# Supplementary material for: Race Disparities in the Contribution of miRNA Isoforms and tRNA-Derived Fragments to Triple-Negative Breast Cancer
Source: Oxford University Press journal article supplement (doi:10.1158/0008-5472.can-17-1947), 2017-12-11
Supplement: 00085472can171947-sup-185602_2_supp_4405681_3zs0x3.xlsx [file 00085472can171947-sup-185602_2_supp_4405681_3zs0x3.xlsx]

## Sheet: S1
Supplementary Table S1: Differentially expressed mRNAs, isomiRs and tRFs
Normal/Black compared to Normal/White				Tumor/White compared to Normal/White				Tumor/Black compared to Normal/Black				Tumor/Black compared to Tumor/White
mRNA	isomiR	tRNA_fragment		mRNA	isomiR	tRNA_fragment		mRNA	isomiR	tRNA_fragment		mRNA	isomiR	tRNA_fragment
Upregulated	Upregulated	Upregulated		Upregulated	Upregulated	Upregulated		Upregulated	Upregulated	Upregulated		Upregulated	Upregulated	Upregulated
LAMP3|27074	MIMAT0000646&MI0000681&hsa-miR-155-5p&offsets|0|-2|TTAATGCTAATCGTGATAGGG	-		TPX2|22974	MIMAT0004494&MI0000077&hsa-miR-21-3p&offsets|0|-1|CAACACCAGTCGATGGGCTG	chr17.trna4-ArgTCT@1.19.19_1_4|Out		EPR1|8475	MIMAT0022727&MI0006444&hsa-miR-1307-5p&offsets|0|0|TCGACCGGACCTCGACCGGCT	chr17.trna23-ArgCCG@1.19.19_1_1|Out		CROCCL1|84809	MIMAT0000099&MI0000103&hsa-miR-101-3p&offsets|0|0,MIMAT0000099&MI0000739&hsa-miR-101-3p&offsets|0|0|TACAGTACTGTGATAACTGAA	chr6.trna152-ValCAC@1.20.20_1_1
INPP5D|3635	MIMAT0000449&MI0000477&hsa-miR-146a-5p&offsets|0|0|TGAGAACTGAATTCCATGGGTT	Downregulated		AURKA|6790	MIMAT0004494&MI0000077&hsa-miR-21-3p&offsets|0|0|CAACACCAGTCGATGGGCTGT	chrMT.trnaMT-ValTAC@45.63.19_1_1|Out		UBE2C|11065	MIMAT0004494&MI0000077&hsa-miR-21-3p&offsets|0|0|CAACACCAGTCGATGGGCTGT	chr1.trna32-MetCAT@34.56.23_1_8		DDX51|317781	MIMAT0000270&MI0000289&hsa-miR-181a-3p&offsets|0|-2|ACCATCGACCGTTGATTGTA	-
PODXL|5420	MIMAT0000646&MI0000681&hsa-miR-155-5p&offsets|0|-1|TTAATGCTAATCGTGATAGGGG	-		PLK1|5347	MIMAT0004494&MI0000077&hsa-miR-21-3p&offsets|0|-2|CAACACCAGTCGATGGGCT	chrMT.trnaMT-ValTAC@42.63.22_1_1|Out		TK1|7083	MIMAT0000617&MI0000650&hsa-miR-200c-3p&offsets|-1|0|CTAATACTGCCGGGTAATGATGGA	chr17.trna4-ArgTCT@1.19.19_1_4|Out		GSTM1|2944	-	Downregulated
CHST2|9435	MIMAT0004682&MI0000760&hsa-miR-361-3p&offsets|0|-3|TCCCCCAGGTGTGATTCTGA	-		HJURP|55355	MIMAT0022727&MI0006444&hsa-miR-1307-5p&offsets|0|0|TCGACCGGACCTCGACCGGCT	chr17.trna23-ArgCCG@1.19.19_1_1|Out		PKMYT1|9088	MIMAT0000432&MI0000457&hsa-miR-141-3p&offsets|0|+1|TAACACTGTCTGGTAAAGATGGC	chr1.trna47-AsnGTT@1.19.19_2_22		ABTB1|80325	Downregulated	chrMT.trnaMT-ValTAC@40.63.24_1_1|Out
TAP1|6890	MIMAT0000449&MI0000477&hsa-miR-146a-5p&offsets|0|-1|TGAGAACTGAATTCCATGGGT	-		CDCA8|55143	MIMAT0022727&MI0006444&hsa-miR-1307-5p&offsets|0|-1|TCGACCGGACCTCGACCGGC	chrMT.trnaMT-ValTAC@43.63.21_1_1|Out		PITX1|5307	MIMAT0004494&MI0000077&hsa-miR-21-3p&offsets|0|-1|CAACACCAGTCGATGGGCTG	chr14.trna18-TyrGTA@1.23.23_1_8|Out		SPON2|10417	MIMAT0000093&MI0000095&hsa-miR-93-5p&offsets|+3|0|AGTGCTGTTCGTGCAGGTAG	chrMT.trnaMT-ValTAC@40.62.23_1_1|Out
PAG1|55824	MIMAT0000646&MI0000681&hsa-miR-155-5p&offsets|0|-3|TTAATGCTAATCGTGATAGG	-		NUF2|83540	MIMAT0000076&MI0000077&hsa-miR-21-5p&offsets|-1|0|GTAGCTTATCAGACTGATGTTGA	chr17.trna19-ArgTCG@1.19.19_1_1		HJURP|55355	MIMAT0004494&MI0000077&hsa-miR-21-3p&offsets|+1|+2|AACACCAGTCGATGGGCTGTCT	chr6.trna152-ValCAC@1.20.20_1_1		ZNF276|92822	MIMAT0000243&MI0000253&hsa-miR-148a-3p&offsets|+4|0|TGCACTACAGAACTTTGT	chrMT.trnaMT-AlaTGC@52.72CCA.21_1_3
IFIH1|64135	MIMAT0000278&MI0000298&hsa-miR-221-3p&offsets|0|-2|AGCTACATTGTCTGCTGGGTT	-		UBE2C|11065	MIMAT0000267&MI0000286&hsa-miR-210-3p&offsets|0|0|CTGTGCGTGTGACAGCGGCTGA	chr1.trna111-HisGTG@9.34.26_1_9		BIRC5|332	MIMAT0000076&MI0000077&hsa-miR-21-5p&offsets|-1|0|GTAGCTTATCAGACTGATGTTGA	chr1.trna111-HisGTG@9.34.26_1_9		RASSF1|11186	MIMAT0000067&MI0000067&hsa-let-7f-5p&offsets|+1|0,MIMAT0000067&MI0000068&hsa-let-7f-5p&offsets|+1|0|GAGGTAGTAGATTGTATAGTT	chrMT.trnaMT-ValTAC@43.63.21_1_1|Out
TAP2|6891	-	-		CDCA3|83461	MIMAT0000076&MI0000077&hsa-miR-21-5p&offsets|-1|-1|GTAGCTTATCAGACTGATGTTG	chr1.trna9-ArgTCT@1.19.19_1_1		NEK2|4751	MIMAT0022727&MI0006444&hsa-miR-1307-5p&offsets|0|-1|TCGACCGGACCTCGACCGGC	chr14.trna1-LeuAAG@37.60.24_2_7		LRFN4|78999	MIMAT0000062&MI0000061&hsa-let-7a-5p&offsets|+1|0,MIMAT0000062&MI0000062&hsa-let-7a-5p&offsets|+1|0,MIMAT0000062&MI0000060&hsa-let-7a-5p&offsets|+1|0|GAGGTAGTAGGTTGTATAGTT	chr1.trna117-GlyTCC@1.23.23_1_7|Out
HCP5|10866	Downregulated	-		CEP55|55165	MIMAT0000617&MI0000650&hsa-miR-200c-3p&offsets|-1|0|CTAATACTGCCGGGTAATGATGGA	chr1.trna47-AsnGTT@1.20.20_2_19		PLK1|5347	MIMAT0022727&MI0006444&hsa-miR-1307-5p&offsets|0|+1|TCGACCGGACCTCGACCGGCTC	chr15.trna7-GlnCTG@23.44.22_1_12|Out		IRF7|3665	MIMAT0000063&MI0000063&hsa-let-7b-5p&offsets|+1|0|GAGGTAGTAGGTTGTGTGGTT	chr15.trna7-GlnCTG@25.41.17_1_13|Out
CXCL9|4283	-	-		FAM83D|81610	MIMAT0000267&MI0000286&hsa-miR-210-3p&offsets|0|+1|CTGTGCGTGTGACAGCGGCTGAT	chr15.trna7-GlnCTG@23.44.22_1_12|Out		CDCA5|113130	MIMAT0000261&MI0000273&hsa-miR-183-5p&offsets|0|0|TATGGCACTGGTAGAATTCACT	chr17.trna19-ArgTCG@1.19.19_1_1		RPS26|6231	MIMAT0000080&MI0000081&hsa-miR-24-3p&offsets|+1|0,MIMAT0000080&MI0000080&hsa-miR-24-3p&offsets|+1|0|GGCTCAGTTCAGCAGGAACAG	chr16.trna11-ProAGG@1.25.25_3_19|Out
RFX5|5993	-	-		KIF4A|24137	MIMAT0000076&MI0000077&hsa-miR-21-5p&offsets|0|+2|TAGCTTATCAGACTGATGTTGACT	chr1.trna47-AsnGTT@1.19.19_2_22		KIFC1|3833	MIMAT0000076&MI0000077&hsa-miR-21-5p&offsets|0|+1|TAGCTTATCAGACTGATGTTGAC	chr15.trna7-GlnCTG@1.30.30_1_7		APOE|348	MIMAT0000082&MI0000750&hsa-miR-26a-5p&offsets|+5|0,MIMAT0000082&MI0000083&hsa-miR-26a-5p&offsets|+5|0|GTAATCCAGGATAGGCT	chr13.trna3-GluTTC@1.16.16_1_2|Out
ISG20|3669	-	-		CDC20|991	MIMAT0000076&MI0000077&hsa-miR-21-5p&offsets|+3|+2|CTTATCAGACTGATGTTGACT	chr17.trna16-GlnTTG@17.33.17_2_12|Out		KIF4A|24137	MIMAT0000617&MI0000650&hsa-miR-200c-3p&offsets|-1|-1|CTAATACTGCCGGGTAATGATGG	chr1.trna35-GlyGCC@1.30.30_1_5		ARHGEF1|9138	MIMAT0000243&MI0000253&hsa-miR-148a-3p&offsets|+1|0|CAGTGCACTACAGAACTTTGT	chr1.trna35-GlyGCC@13.31.19_4_19|Out
ART3|419	-	-		FOXM1|2305	MIMAT0000267&MI0000286&hsa-miR-210-3p&offsets|0|-1|CTGTGCGTGTGACAGCGGCTG	chr17.trna18-ArgCCT@1.19.19_1_3		FOXM1|2305	MIMAT0000432&MI0000457&hsa-miR-141-3p&offsets|0|+2|TAACACTGTCTGGTAAAGATGGCT	chr1.trna47-AsnGTT@1.20.20_2_19		PDLIM2|64236	MIMAT0000062&MI0000061&hsa-let-7a-5p&offsets|+1|-1,MIMAT0000062&MI0000062&hsa-let-7a-5p&offsets|+1|-1,MIMAT0000062&MI0000060&hsa-let-7a-5p&offsets|+1|-1|GAGGTAGTAGGTTGTATAGT	chr17.trna42-LeuTAG@1.16.16_2_9
GBP5|115362	-	-		AURKB|9212	MIMAT0000076&MI0000077&hsa-miR-21-5p&offsets|0|+1|TAGCTTATCAGACTGATGTTGAC	chr1.trna111-HisGTG@9.31.23_1_10		CDC20|991	MIMAT0000259&MI0000272&hsa-miR-182-5p&offsets|0|+1|TTTGGCAATGGTAGAACTCACACTG	chr14.trna18-TyrGTA@1.25.25_1_8|Out		KRT81|3887	MIMAT0000261&MI0000273&hsa-miR-183-5p&offsets|+2|0|TGGCACTGGTAGAATTCACT	chr1.trna117-GlyTCC@1.26.26_1_7|Out
CD2|914	-	-		UBE2T|29089	MIMAT0000680&MI0000734&hsa-miR-106b-5p&offsets|0|0|TAAAGTGCTGACAGTGCAGAT	chr15.trna7-GlnCTG@17.34.18_1_7|Out		E2F1|1869	MIMAT0000076&MI0000077&hsa-miR-21-5p&offsets|0|+2|TAGCTTATCAGACTGATGTTGACT	chr17.trna16-GlnTTG@17.33.17_2_12|Out		GABBR1|2550	MIMAT0000689&MI0000746&hsa-miR-99b-5p&offsets|0|-5|CACCCGTAGAACCGACC	chr17.trna16-GlnTTG@15.30.16_2_13|Out
BTN3A1|11119	-	-		CDK1|983	MIMAT0022727&MI0006444&hsa-miR-1307-5p&offsets|0|+1|TCGACCGGACCTCGACCGGCTC	chr14.trna18-TyrGTA@1.25.25_1_8|Out		CDCA3|83461	MIMAT0000261&MI0000273&hsa-miR-183-5p&offsets|+1|+1|ATGGCACTGGTAGAATTCACTG	chr14.trna7-ArgACG@1.19.19_1_7|Out		PWP2|5822	MIMAT0000261&MI0000273&hsa-miR-183-5p&offsets|+2|+1|TGGCACTGGTAGAATTCACTG	chrMT.trnaMT-ValTAC@42.63.22_1_1|Out
CXCR4|7852	-	-		BUB1|699	MIMAT0000095&MI0000098&hsa-miR-96-5p&offsets|0|0|TTTGGCACTAGCACATTTTTGCT	chr1.trna35-GlyGCC@1.21.21_1_5|Out		UBE2T|29089	MIMAT0000261&MI0000273&hsa-miR-183-5p&offsets|+1|0|ATGGCACTGGTAGAATTCACT	chr1.trna111-HisGTG@9.31.23_1_10		CROCC|9696	MIMAT0000261&MI0000273&hsa-miR-183-5p&offsets|+2|+2|TGGCACTGGTAGAATTCACTGT	chr1.trna35-GlyGCC@9.31.23_4_18|Out
KCNK5|8645	-	-		CCNB2|9133	MIMAT0000261&MI0000273&hsa-miR-183-5p&offsets|+1|+1|ATGGCACTGGTAGAATTCACTG	chr7.trna5-CysGCA@7.34.28_1_6|Out		FAM83D|81610	MIMAT0000267&MI0000286&hsa-miR-210-3p&offsets|0|+1|CTGTGCGTGTGACAGCGGCTGAT	chr15.trna4-ArgTCG@1.19.19_2_4		WASH7P|653635	MIMAT0000245&MI0000255&hsa-miR-30d-5p&offsets|+1|0|GTAAACATCCCCGACTGGAAG	chrMT.trnaMT-ValTAC@43.62.20_1_1|Out
HAPLN3|145864	-	-		MELK|9833	MIMAT0000076&MI0000077&hsa-miR-21-5p&offsets|+3|+1|CTTATCAGACTGATGTTGAC	chr1.trna32-MetCAT@34.56.23_1_8		AURKA|6790	MIMAT0000267&MI0000286&hsa-miR-210-3p&offsets|0|0|CTGTGCGTGTGACAGCGGCTGA	chr1.trna9-ArgTCT@1.19.19_1_1		PITPNM2|57605	MIMAT0000076&MI0000077&hsa-miR-21-5p&offsets|+1|+1|AGCTTATCAGACTGATGTTGAC	chr17.trna42-LeuTAG@1.22.22_2_9
LIMD2|80774	-	-		KIF2C|11004	MIMAT0000680&MI0000734&hsa-miR-106b-5p&offsets|0|+1|TAAAGTGCTGACAGTGCAGATA	chr15.trna4-ArgTCG@1.19.19_2_4		TPX2|22974	MIMAT0000259&MI0000272&hsa-miR-182-5p&offsets|0|0|TTTGGCAATGGTAGAACTCACACT	chr1.trna116-GluCTC@1.28.28_1_8|Out		THBS3|7059	MIMAT0000082&MI0000750&hsa-miR-26a-5p&offsets|+5|-1,MIMAT0000082&MI0000083&hsa-miR-26a-5p&offsets|+5|-1|GTAATCCAGGATAGGC	chr19.trna2-GlyTCC@1.26.26_1_1|Out
E2F3|1871	-	-		NDC80|10403	MIMAT0000617&MI0000650&hsa-miR-200c-3p&offsets|-1|-1|CTAATACTGCCGGGTAATGATGG	chrMT.trnaMT-ValTAC@40.63.24_1_1|Out		AURKB|9212	MIMAT0000076&MI0000077&hsa-miR-21-5p&offsets|0|0|TAGCTTATCAGACTGATGTTGA	chr1.trna111-HisGTG@15.34.20_1_9		SNAPC4|6621	MIMAT0000418&MI0000439&hsa-miR-23b-3p&offsets|+1|+2|TCACATTGCCAGGGATTACCAC	chrMT.trnaMT-GluTTC@39.59.21_1_2
BTN3A2|11118	-	-		CDCA5|113130	MIMAT0004494&MI0000077&hsa-miR-21-3p&offsets|+1|+2|AACACCAGTCGATGGGCTGTCT	chr1.trna111-HisGTG@9.29.21_1_10|Out		UHRF1|29128	MIMAT0000261&MI0000273&hsa-miR-183-5p&offsets|0|+1|TATGGCACTGGTAGAATTCACTG	chr1.trna111-HisGTG@13.34.22_1_9		CHKB-CPT1B|386593	MIMAT0000243&MI0000253&hsa-miR-148a-3p&offsets|+1|+1|CAGTGCACTACAGAACTTTGTC	chr1.trna116-GluCTC@52.75CCA.24_3_13
C21orf91|54149	-	-		IQGAP3|128239	MIMAT0022727&MI0006444&hsa-miR-1307-5p&offsets|0|+2|TCGACCGGACCTCGACCGGCTCG	chr15.trna7-GlnCTG@1.30.30_1_7		NUF2|83540	MIMAT0022727&MI0006444&hsa-miR-1307-5p&offsets|0|+2|TCGACCGGACCTCGACCGGCTCG	chr1.trna35-GlyGCC@1.29.29_1_5		PLCB2|5330	MIMAT0000063&MI0000063&hsa-let-7b-5p&offsets|+1|+1|GAGGTAGTAGGTTGTGTGGTTT	chr11.trna17-ValTAC@1.26.26_1_2
CXCL10|3627	-	-		CCNA2|890	MIMAT0000072&MI0000072&hsa-miR-18a-5p&offsets|0|0|TAAGGTGCATCTAGTGCAGATAG	chr1.trna35-GlyGCC@1.23.23_1_5|Out		CDK1|983	MIMAT0000617&MI0000650&hsa-miR-200c-3p&offsets|0|+1|TAATACTGCCGGGTAATGATGGAG	chrMT.trnaMT-ValTAC@45.63.19_1_1|Out		UCKL1|54963	MIMAT0000259&MI0000272&hsa-miR-182-5p&offsets|+1|-2|TTGGCAATGGTAGAACTCACA	chr17.trna42-LeuTAG@1.26.26_2_9
CCL19|6363	-	-		NEK2|4751	MIMAT0000261&MI0000273&hsa-miR-183-5p&offsets|0|+2|TATGGCACTGGTAGAATTCACTGT	chr1.trna35-GlyGCC@1.30.30_1_5		MELK|9833	MIMAT0000682&MI0000737&hsa-miR-200a-3p&offsets|0|+1|TAACACTGTCTGGTAACGATGTT	chr17.trna18-ArgCCT@1.19.19_1_3		PARP10|84875	MIMAT0000259&MI0000272&hsa-miR-182-5p&offsets|+1|-1|TTGGCAATGGTAGAACTCACAC	chr11.trna17-ValTAC@1.23.23_1_3
TRIM14|9830	-	-		NCAPG|64151	MIMAT0000691&MI0000748&hsa-miR-130b-3p&offsets|0|0|CAGTGCAATGATGAAAGGGCAT	chr1.trna35-GlyGCC@12.32.21_4_18|Out		KIF2C|11004	MIMAT0000261&MI0000273&hsa-miR-183-5p&offsets|0|+2|TATGGCACTGGTAGAATTCACTGT	chr1.trna34-LeuCAG@1.30.30_1_9|Out		C17orf56|146705	MIMAT0000253&MI0000266&hsa-miR-10a-5p&offsets|+2|-1|CCCTGTAGATCCGAATTTGT	chrMT.trnaMT-AlaTGC@53.72CCA.20_1_3
PARP12|64761	-	-		DEPDC1|55635	MIMAT0000261&MI0000273&hsa-miR-183-5p&offsets|+1|0|ATGGCACTGGTAGAATTCACT	chr6.trna152-ValCAC@1.20.20_1_1		MYBL2|4605	MIMAT0000259&MI0000272&hsa-miR-182-5p&offsets|0|+2|TTTGGCAATGGTAGAACTCACACTGG	-		SFRS16|11129	MIMAT0000101&MI0000108&hsa-miR-103a-3p&offsets|+1|-1,MIMAT0000101&MI0000109&hsa-miR-103a-3p&offsets|+1|-1|GCAGCATTGTACAGGGCTATG	chr1.trna85-ValCAC@1.26.26_2_16|Out
PSMB8|5696	-	-		CCNB1|891	MIMAT0000261&MI0000273&hsa-miR-183-5p&offsets|0|+1|TATGGCACTGGTAGAATTCACTG	chr1.trna111-HisGTG@15.34.20_1_9		PTTG1|9232	MIMAT0000617&MI0000650&hsa-miR-200c-3p&offsets|-1|-2|CTAATACTGCCGGGTAATGATG	Downregulated		LMNA|4000	MIMAT0000077&MI0000078&hsa-miR-22-3p&offsets|+2|0|GCTGCCAGTTGAAGAACTGT	chr13.trna3-GluTTC@1.26.26_1_2
ATP2A3|489	-	-		MYBL2|4605	MIMAT0000432&MI0000457&hsa-miR-141-3p&offsets|0|+2|TAACACTGTCTGGTAAAGATGGCT	chr1.trna35-GlyGCC@1.22.22_1_5|Out		KIF23|9493	MIMAT0000259&MI0000272&hsa-miR-182-5p&offsets|0|+3|TTTGGCAATGGTAGAACTCACACTGGT	chr1.trna111-HisGTG@-1A.20.21_1_9		C19orf29|58509	MIMAT0000443&MI0000469&hsa-miR-125a-5p&offsets|+1|-2|CCCTGAGACCCTTTAACCTGT	chr17.trna16-GlnTTG@13.30.18_2_13|Out
CD3E|916	-	-		KIFC1|3833	MIMAT0000070&MI0000071&hsa-miR-17-5p&offsets|0|+1|CAAAGTGCTTACAGTGCAGGTAGT	chr1.trna35-GlyGCC@1.29.29_1_5		HOMER3|9454	MIMAT0004494&MI0000077&hsa-miR-21-3p&offsets|0|-2|CAACACCAGTCGATGGGCT	chr1.trna111-HisGTG@-1A.22.23_1_9		STK11IP|114790	MIMAT0000418&MI0000439&hsa-miR-23b-3p&offsets|+1|0|TCACATTGCCAGGGATTACC	chr1.trna117-GlyTCC@1.24.24_1_7|Out
AQP5|362	-	-		PTTG1|9232	MIMAT0000259&MI0000272&hsa-miR-182-5p&offsets|0|+1|TTTGGCAATGGTAGAACTCACACTG	chr17.trna15-CysGCA@1.29.29_1_5|Out		KIF20A|10112	MIMAT0000071&MI0000071&hsa-miR-17-3p&offsets|0|+1|ACTGCAGTGAAGGCACTTGTAGC	chr1.trna111-HisGTG@-1T.20.21_1_9		HIP1R|9026	MIMAT0000259&MI0000272&hsa-miR-182-5p&offsets|+1|-3|TTGGCAATGGTAGAACTCAC	chr16.trna11-ProAGG@1.16.16_3_20|Out
SPOCK2|9806	-	-		MMP1|4312	MIMAT0000434&MI0000458&hsa-miR-142-3p&offsets|+1|0|GTAGTGTTTCCTACTTTATGGA	chr14.trna7-ArgACG@1.19.19_1_7|Out		IQGAP3|128239	MIMAT0004586&MI0000438&hsa-miR-15b-3p&offsets|0|-1|CGAATCATTATTTGCTGCTCT	chr1.trna111-HisGTG@-1T.21.22_1_9		EDN1|1906	MIMAT0000435&MI0000459&hsa-miR-143-3p&offsets|+1|-1|GAGATGAAGCACTGTAGCT	chr19.trna2-GlyTCC@1.16.16_1_9|Out
DTX3L|151636	-	-		ANLN|54443	MIMAT0000076&MI0000077&hsa-miR-21-5p&offsets|+3|0|CTTATCAGACTGATGTTGA	chrMT.trnaMT-GluTTC@39.61.23_1_2		CEP55|55165	MIMAT0004494&MI0000077&hsa-miR-21-3p&offsets|0|+2|CAACACCAGTCGATGGGCTGTCT	chr15.trna7-GlnCTG@23.40.18_1_13|Out		RASA4|10156	MIMAT0000259&MI0000272&hsa-miR-182-5p&offsets|+1|-4|TTGGCAATGGTAGAACTCA	chr15.trna7-GlnCTG@16.34.19_1_7|Out
CIITA|4261	-	-		KIF20A|10112	MIMAT0000267&MI0000286&hsa-miR-210-3p&offsets|0|-2|CTGTGCGTGTGACAGCGGCT	chr1.trna111-HisGTG@13.34.22_1_9		CDCA8|55143	MIMAT0022692&MI0000270&hsa-miR-181b-3p&offsets|0|-1|CTCACTGAACAATGAATGCA	chr1.trna111-HisGTG@-1T.19.20_1_9		RPS6KA4|8986	MIMAT0000254&MI0000267&hsa-miR-10b-5p&offsets|+2|-1|CCCTGTAGAACCGAATTTGT	chr19.trna2-GlyTCC@1.23.23_1_1|Out
ATP8A1|10396	-	-		PRC1|9055	MIMAT0000259&MI0000272&hsa-miR-182-5p&offsets|0|+3|TTTGGCAATGGTAGAACTCACACTGGT	chr1.trna116-GluCTC@51.75CCA.25_3_11		BUB1|699	MIMAT0000261&MI0000273&hsa-miR-183-5p&offsets|0|-1|TATGGCACTGGTAGAATTCAC	chr1.trna111-HisGTG@-1T.22.23_1_9		NRARP|441478	MIMAT0000080&MI0000081&hsa-miR-24-3p&offsets|+1|-2,MIMAT0000080&MI0000080&hsa-miR-24-3p&offsets|+1|-2|GGCTCAGTTCAGCAGGAAC	chrMT.trnaMT-GluTTC@40.63.24_1_2
RPS26|6231	-	-		CENPF|1063	MIMAT0000261&MI0000273&hsa-miR-183-5p&offsets|+1|+2|ATGGCACTGGTAGAATTCACTGT	chrMT.trnaMT-ProTGG@55.70CC.16_1_1|Out		CCNB2|9133	MIMAT0000093&MI0000095&hsa-miR-93-5p&offsets|0|+1|CAAAGTGCTGTTCGTGCAGGTAGT	chr1.trna111-HisGTG@-1T.18.19_1_9		MAP2K7|5609	MIMAT0000617&MI0000650&hsa-miR-200c-3p&offsets|+1|0|AATACTGCCGGGTAATGATGGA	chr6.trna51-SerTGA@1.25.25_2_11
PARP14|54625	-	-		ASPM|259266	MIMAT0000434&MI0000458&hsa-miR-142-3p&offsets|0|0|TGTAGTGTTTCCTACTTTATGGA	chr1.trna111-HisGTG@13.33.21_1_9		MFAP2|4237	MIMAT0000095&MI0000098&hsa-miR-96-5p&offsets|0|0|TTTGGCACTAGCACATTTTTGCT	chr15.trna7-GlnCTG@34.53.20_1_11		TRABD|80305	MIMAT0000064&MI0000064&hsa-let-7c-5p&offsets|+1|0|GAGGTAGTAGGTTGTATGGTT	chr17.trna16-GlnTTG@10.30.21_2_13|Out
POLR2J3|548644	-	-		DLGAP5|9787	MIMAT0000434&MI0000458&hsa-miR-142-3p&offsets|+1|+1|GTAGTGTTTCCTACTTTATGGAT	chrMT.trnaMT-ValTAC@40.62.23_1_1|Out		CDT1|81620	MIMAT0001536&MI0001641&hsa-miR-429&offsets|0|0|TAATACTGTCTGGTAAAACCGT	chr1.trna111-HisGTG@4.30.27_1_9|Out		C6orf108|10591	MIMAT0000086&MI0000087&hsa-miR-29a-3p&offsets|+1|-1|AGCACCATCTGAAATCGGTT	chr16.trna27-LeuTAG@1.26.26_1_1
TRIM38|10475	-	-		TTK|7272	MIMAT0000432&MI0000457&hsa-miR-141-3p&offsets|0|+1|TAACACTGTCTGGTAAAGATGGC	chrMT.trnaMT-ValTAC@43.62.20_1_1|Out		MCM10|55388	MIMAT0004598&MI0000457&hsa-miR-141-5p&offsets|0|0|CATCTTCCAGTACAGTGTTGGA	chr17.trna18-ArgCCT@35.54.20_1_5		ARHGAP4|393	MIMAT0000438&MI0000462&hsa-miR-152-3p&offsets|+1|0|CAGTGCATGACAGAACTTGG	chr1.trna111-HisGTG@4.33.30_1_9
ARMC10|83787	-	-		MCM10|55388	MIMAT0000261&MI0000273&hsa-miR-183-5p&offsets|0|0|TATGGCACTGGTAGAATTCACT	chr15.trna7-GlnCTG@1.29.29_1_7|Out		RECQL4|9401	MIMAT0000072&MI0000072&hsa-miR-18a-5p&offsets|0|0|TAAGGTGCATCTAGTGCAGATAG	chr12.trna5-AspGTC@32.53.22_1_14		MINK1|50488	MIMAT0004809&MI0003642&hsa-miR-628-5p&offsets|+1|0|TGCTGACATATTTACTAGAGG	chrMT.trnaMT-ValTAC@53.72CCA.20_1_1
FYB|2533	-	-		CENPE|1062	MIMAT0000259&MI0000272&hsa-miR-182-5p&offsets|0|+2|TTTGGCAATGGTAGAACTCACACTGG	chr1.trna111-HisGTG@4.33.30_1_9		RNASEH2A|10535	MIMAT0000680&MI0000734&hsa-miR-106b-5p&offsets|0|0|TAAAGTGCTGACAGTGCAGAT	chr15.trna7-GlnCTG@19.40.22_1_7		HDAC10|83933	MIMAT0000070&MI0000071&hsa-miR-17-5p&offsets|+3|0,MIMAT0000103&MI0000113&hsa-miR-106a-5p&offsets|+3|0|AGTGCTTACAGTGCAGGTAG	chr17.trna42-LeuTAG@1.24.24_2_9
MMP1|4312	-	-		NCAPH|23397	MIMAT0000093&MI0000095&hsa-miR-93-5p&offsets|0|+1|CAAAGTGCTGTTCGTGCAGGTAGT	chr1.trna111-HisGTG@16.34.19_1_9		ASF1B|55723	MIMAT0000095&MI0000098&hsa-miR-96-5p&offsets|0|-1|TTTGGCACTAGCACATTTTTGC	chr19.trna2-GlyTCC@31.53.23_1_8		LENG8|114823	MIMAT0000101&MI0000108&hsa-miR-103a-3p&offsets|+1|0,MIMAT0000101&MI0000109&hsa-miR-103a-3p&offsets|+1|0|GCAGCATTGTACAGGGCTATGA	chrMT.trnaMT-GluTTC@51.72CCA.22_1_2
OAS3|4940	-	-		BIRC5|332	MIMAT0000076&MI0000077&hsa-miR-21-5p&offsets|0|-2|TAGCTTATCAGACTGATGTT	chr1.trna35-GlyGCC@9.32.24_4_18|Out		GPR172A|79581	MIMAT0000261&MI0000273&hsa-miR-183-5p&offsets|+1|+2|ATGGCACTGGTAGAATTCACTGT	chr1.trna111-HisGTG@-1A.23.24_1_9		CSAD|51380	MIMAT0000063&MI0000063&hsa-let-7b-5p&offsets|+1|-1|GAGGTAGTAGGTTGTGTGGT	chrMT.trnaMT-ValTAC@45.63.19_1_1|Out
RAC2|5880	-	-		KPNA2|3838	MIMAT0000259&MI0000272&hsa-miR-182-5p&offsets|0|0|TTTGGCAATGGTAGAACTCACACT	chr15.trna7-GlnCTG@1.23.23_1_7|Out		SLC7A5|8140	MIMAT0002874&MI0003188&hsa-miR-503-5p&offsets|0|0|TAGCAGCGGGAACAGTTCTGCAG	chr15.trna7-GlnCTG@19.41.23_1_7		NEAT1|283131	MIMAT0004809&MI0003642&hsa-miR-628-5p&offsets|+1|-1|TGCTGACATATTTACTAGAG	chr1.trna111-HisGTG@16.31.16_1_10|Out
CKAP2|26586	-	-		TRIP13|9319	MIMAT0004494&MI0000077&hsa-miR-21-3p&offsets|0|+2|CAACACCAGTCGATGGGCTGTCT	chr19.trna10-IleTAT@1.20.20_1_5|Out		HMGB3|3149	MIMAT0000318&MI0000342&hsa-miR-200b-3p&offsets|0|+1|TAATACTGCCTGGTAATGATGAC	chrMT.trnaMT-PheGAA@59.74CCA.16_1_1|Out		MYO15B|80022	MIMAT0000097&MI0000101&hsa-miR-99a-5p&offsets|+1|0|ACCCGTAGATCCGATCTTGTG	chr5.trna15-ValAAC@1.23.23_1_1
HLA-B|3106	-	-		SPAG5|10615	MIMAT0000261&MI0000273&hsa-miR-183-5p&offsets|-2|-1|TGTATGGCACTGGTAGAATTCAC	chr1.trna54-LysTTT@1.30.30_1_6		PPP1R14B|26472	MIMAT0000758&MI0000810&hsa-miR-135b-5p&offsets|0|-1|TATGGCTTTTCATTCCTATGTG	chr17.trna16-GlnTTG@32.53.22_1_4		MIIP|60672	MIMAT0000077&MI0000078&hsa-miR-22-3p&offsets|+1|0|AGCTGCCAGTTGAAGAACTGT	chrMT.trnaMT-GluTTC@39.62.24_1_2
NLRC5|84166	-	-		COL10A1|1300	MIMAT0000617&MI0000650&hsa-miR-200c-3p&offsets|-1|-2|CTAATACTGCCGGGTAATGATG	chr14.trna18-TyrGTA@1.23.23_1_8|Out		UBE2S|27338	MIMAT0004586&MI0000438&hsa-miR-15b-3p&offsets|0|0|CGAATCATTATTTGCTGCTCTA	chr19.trna2-GlyTCC@32.53.22_1_8		CORO1A|11151	MIMAT0000253&MI0000266&hsa-miR-10a-5p&offsets|+4|-1|CTGTAGATCCGAATTTGT	chrMT.trnaMT-GluTTC@39.63.25_1_2
ITGAL|3683	-	-		ASF1B|55723	MIMAT0005951&MI0006444&hsa-miR-1307-3p&offsets|+1|0|CTCGGCGTGGCGTCGGTCGTG	chr1.trna35-GlyGCC@13.32.20_4_19|Out		PRC1|9055	MIMAT0000261&MI0000273&hsa-miR-183-5p&offsets|+1|-1|ATGGCACTGGTAGAATTCAC	chr13.trna5-GluTTC@8.30.23_1_4		DTNBP1|84062	MIMAT0000254&MI0000267&hsa-miR-10b-5p&offsets|0|-8|TACCCTGTAGAACCG	chr1.trna85-ValCAC@1.23.23_2_16|Out
HLA-DRB1|3123	-	-		PKMYT1|9088	MIMAT0000434&MI0000458&hsa-miR-142-3p&offsets|0|-2|TGTAGTGTTTCCTACTTTATG	chr6.trna16-TyrGTA@1.25.25_1_3|Out		ANLN|54443	MIMAT0000432&MI0000457&hsa-miR-141-3p&offsets|0|0|TAACACTGTCTGGTAAAGATGG	chr1.trna69-AspGTC@52.73C.22_1_12		MICAL1|64780	MIMAT0003163&MI0003514&hsa-miR-539-5p&offsets|0|0|GGAGAAATTATCCTTGGTGTGT	chr6.trna110-AlaTGC@1.20.20_5_13
LOC253039|253039	-	-		MMP11|4320	MIMAT0000433&MI0000458&hsa-miR-142-5p&offsets|0|0|CATAAAGTAGAAAGCACTACT	chrMT.trnaMT-ValTAC@39.68.30_1_1|Out		DLGAP5|9787	MIMAT0001620&MI0000737&hsa-miR-200a-5p&offsets|+1|0|ATCTTACCGGACAGTGCTGGA	chr17.trna16-GlnTTG@19.40.22_1_5|Out		JUNB|3726	MIMAT0000069&MI0000070&hsa-miR-16-5p&offsets|+5|0,MIMAT0000069&MI0000115&hsa-miR-16-5p&offsets|+5|0|GCACGTAAATATTGGCG	chr1.trna35-GlyGCC@13.30.18_4_19|Out
POP1|10940	-	-		KIF11|3832	MIMAT0000071&MI0000071&hsa-miR-17-3p&offsets|0|+1|ACTGCAGTGAAGGCACTTGTAGC	chrMT.trnaMT-ProTGG@51.70CC.20_1_1		CCNB1|891	MIMAT0000093&MI0000095&hsa-miR-93-5p&offsets|0|0|CAAAGTGCTGTTCGTGCAGGTAG	chr15.trna7-GlnCTG@20.40.21_1_7|Out		PIM1|5292	MIMAT0000078&MI0000079&hsa-miR-23a-3p&offsets|+1|-2|TCACATTGCCAGGGATTT	chrMT.trnaMT-AlaTGC@54.72CCA.19_1_3
PSMB9|5698	-	-		MKI67|4288	MIMAT0000261&MI0000273&hsa-miR-183-5p&offsets|-2|-2|TGTATGGCACTGGTAGAATTCA	chrMT.trnaMT-ProTGG@49.70CC.22_1_1		PAQR4|124222	MIMAT0000076&MI0000077&hsa-miR-21-5p&offsets|-1|-1|GTAGCTTATCAGACTGATGTTG	chr15.trna7-GlnCTG@20.41.22_1_7		GTPBP5|26164	MIMAT0000254&MI0000267&hsa-miR-10b-5p&offsets|+4|-1|CTGTAGAACCGAATTTGT	chrMT.trnaMT-TyrGTA@13.33.21_1_1|Out
PRR4|11272	-	-		HMGB3|3149	MIMAT0004680&MI0000748&hsa-miR-130b-5p&offsets|0|+1|ACTCTTTCCCTGTTGCACTACT	chr1.trna35-GlyGCC@10.32.23_4_18|Out		NCAPH|23397	MIMAT0000101&MI0000108&hsa-miR-103a-3p&offsets|+2|0,MIMAT0000101&MI0000109&hsa-miR-103a-3p&offsets|+2|0|CAGCATTGTACAGGGCTATGA	chr17.trna16-GlnTTG@12.31.20_2_12|Out		C11orf2|738	MIMAT0000418&MI0000439&hsa-miR-23b-3p&offsets|+1|+1|TCACATTGCCAGGGATTACCA	chr1.trna35-GlyGCC@13.32.20_4_19|Out
CRLF3|51379	-	-		CKS2|1164	MIMAT0000758&MI0000810&hsa-miR-135b-5p&offsets|0|-1|TATGGCTTTTCATTCCTATGTG	chr1.trna116-GluCTC@1.28.28_1_8|Out		ECE2|9718	MIMAT0000434&MI0000458&hsa-miR-142-3p&offsets|0|-2|TGTAGTGTTTCCTACTTTATG	chrMT.trnaMT-GluTTC@41.62.22_1_2		KRT14|3861	MIMAT0003393&MI0001448&hsa-miR-425-5p&offsets|+2|+2|TGACACGATCACTCCCGTTGAGT	chr1.trna85-ValCAC@1.25.25_2_16|Out
HLA-DRB5|3127	-	-		RRM2|6241	MIMAT0000076&MI0000077&hsa-miR-21-5p&offsets|0|0|TAGCTTATCAGACTGATGTTGA	chr17.trna16-GlnTTG@1.19.19_1_3		H2AFX|3014	MIMAT0000434&MI0000458&hsa-miR-142-3p&offsets|+1|+1|GTAGTGTTTCCTACTTTATGGAT	chr17.trna16-GlnTTG@16.31.16_2_12|Out		POLR2J3|548644	MIMAT0000077&MI0000078&hsa-miR-22-3p&offsets|+1|-1|AGCTGCCAGTTGAAGAACTG	chr15.trna4-ArgTCG@1.25.25_2_4
SEMA4D|10507	-	-		NUSAP1|51203	MIMAT0000070&MI0000071&hsa-miR-17-5p&offsets|0|0|CAAAGTGCTTACAGTGCAGGTAG	chr1.trna111-HisGTG@15.33.19_1_9		TACC3|10460	MIMAT0005951&MI0006444&hsa-miR-1307-3p&offsets|0|0|ACTCGGCGTGGCGTCGGTCGTG	chr17.trna16-GlnTTG@23.40.18_1_5|Out		PIM2|11040	MIMAT0000081&MI0000082&hsa-miR-25-3p&offsets|+1|0|ATTGCACTTGTCTCGGTCTGA	chr16.trna34-GlyCCC@1.20.20_1_2
TAPBP|6892	-	-		UBE2S|27338	MIMAT0000101&MI0000108&hsa-miR-103a-3p&offsets|+2|0,MIMAT0000101&MI0000109&hsa-miR-103a-3p&offsets|+2|0|CAGCATTGTACAGGGCTATGA	chr17.trna16-GlnTTG@12.33.22_2_12|Out		RRM2|6241	MIMAT0000441&MI0000466&hsa-miR-9-5p&offsets|0|-1,MIMAT0000441&MI0000468&hsa-miR-9-5p&offsets|0|-1,MIMAT0000441&MI0000467&hsa-miR-9-5p&offsets|0|-1|TCTTTGGTTATCTAGCTGTATG	chrMT.trnaMT-PheGAA@1.20.20_1_1		PIN1|5300	MIMAT0000267&MI0000286&hsa-miR-210-3p&offsets|0|-1|CTGTGCGTGTGACAGCGGCTG	chr1.trna68-GlyGCC@1.25.25_2_10|Out
TRAF1|7185	-	-		STMN1|3925	MIMAT0004784&MI0003513&hsa-miR-455-3p&offsets|0|-1|GCAGTCCATGGGCATATACA	chr17.trna16-GlnTTG@1.30.30_1_3		SPAG5|10615	MIMAT0000417&MI0000438&hsa-miR-15b-5p&offsets|0|0|TAGCAGCACATCATGGTTTACA	chr17.trna16-GlnTTG@11.31.21_2_12|Out		MUS81|80198	MIMAT0000076&MI0000077&hsa-miR-21-5p&offsets|+1|-1|AGCTTATCAGACTGATGTTG	chr6.trna110-AlaTGC@60.75CCA.16_2_5|Out
-	-	-		BUB1B|701	MIMAT0004586&MI0000438&hsa-miR-15b-3p&offsets|0|0|CGAATCATTATTTGCTGCTCTA	chr1.trna111-HisGTG@16.35.20_1_9		CENPF|1063	MIMAT0000222&MI0000234&hsa-miR-192-5p&offsets|+1|+2|TGACCTATGAATTGACAGCCAG	chr1.trna111-HisGTG@-1T.23.24_1_9		FGD3|89846	MIMAT0000254&MI0000267&hsa-miR-10b-5p&offsets|+2|0|CCCTGTAGAACCGAATTTGTG	chr1.trna68-GlyGCC@1.23.23_2_10|Out
Downregulated	-	-		GINS1|9837	MIMAT0000076&MI0000077&hsa-miR-21-5p&offsets|+4|+1|TTATCAGACTGATGTTGAC	chr1.trna35-GlyGCC@13.31.19_4_19|Out		CCNA2|890	MIMAT0000076&MI0000077&hsa-miR-21-5p&offsets|0|-1|TAGCTTATCAGACTGATGTTG	chr1.trna111-HisGTG@2.30.29_1_9		CPT1B|1375	MIMAT0000076&MI0000077&hsa-miR-21-5p&offsets|+2|+1|GCTTATCAGACTGATGTTGAC	chr17.trna42-LeuTAG@1.25.25_2_9
LOC90784|90784	-	-		TACC3|10460	MIMAT0001620&MI0000737&hsa-miR-200a-5p&offsets|+1|0|ATCTTACCGGACAGTGCTGGA	chr1.trna35-GlyGCC@12.34.23_1_13|Out		CDC6|990	MIMAT0000076&MI0000077&hsa-miR-21-5p&offsets|0|-2|TAGCTTATCAGACTGATGTT	chr13.trna5-GluTTC@8.31.24_1_4		ARHGAP27|201176	MIMAT0000757&MI0000809&hsa-miR-151a-3p&offsets|+1|0|TAGACTGAAGCTCCTTGAGG	chr17.trna42-LeuTAG@1.18.18_2_9
-	-	-		ARHGAP11A|9824	MIMAT0000076&MI0000077&hsa-miR-21-5p&offsets|0|-1|TAGCTTATCAGACTGATGTTG	chr1.trna35-GlyGCC@11.34.24_1_13|Out		ASPM|259266	MIMAT0000433&MI0000458&hsa-miR-142-5p&offsets|0|0|CATAAAGTAGAAAGCACTACT	chr17.trna16-GlnTTG@15.31.17_2_12|Out		RBM38|55544	MIMAT0000063&MI0000063&hsa-let-7b-5p&offsets|+1|-2|GAGGTAGTAGGTTGTGTGG	chrMT.trnaMT-GluTTC@40.59.20_1_2
-	-	-		CBX2|84733	MIMAT0000071&MI0000071&hsa-miR-17-3p&offsets|+1|0|CTGCAGTGAAGGCACTTGTAG	chr1.trna111-HisGTG@13.35.23_1_9		TTK|7272	MIMAT0000259&MI0000272&hsa-miR-182-5p&offsets|0|-1|TTTGGCAATGGTAGAACTCACAC	chrMT.trnaMT-ValTAC@56.72CCA.17_1_1		DVL1|1855	MIMAT0000069&MI0000070&hsa-miR-16-5p&offsets|+5|+1,MIMAT0000069&MI0000115&hsa-miR-16-5p&offsets|+5|+1|GCACGTAAATATTGGCGT	chr13.trna5-GluTTC@1.26.26_1_2
-	-	-		TOP2A|7153	MIMAT0000076&MI0000077&hsa-miR-21-5p&offsets|+5|+2|TATCAGACTGATGTTGACT	chr1.trna35-GlyGCC@9.31.23_4_18|Out		NUSAP1|51203	MIMAT0000076&MI0000077&hsa-miR-21-5p&offsets|+3|+2|CTTATCAGACTGATGTTGACT	chr6.trna10-AlaCGC@54.75CCA.22_2_5		DEF6|50619	MIMAT0000232&MI0000281&hsa-miR-199a-3p&offsets|+3|-1,MIMAT0000232&MI0000242&hsa-miR-199a-3p&offsets|+3|-1,MIMAT0004563&MI0000282&hsa-miR-199b-3p&offsets|+3|-1|GTAGTCTGCACATTGGTT	chr16.trna15-ThrCGT@1.24.24_1_2
-	-	-		CENPN|55839	MIMAT0000076&MI0000077&hsa-miR-21-5p&offsets|0|+5|TAGCTTATCAGACTGATGTTGACTGTT	chrMT.trnaMT-ProTGG@50.70CC.21_1_1		DDX39|10212	MIMAT0004494&MI0000077&hsa-miR-21-3p&offsets|0|+1|CAACACCAGTCGATGGGCTGTC	chr1.trna69-AspGTC@52.75CCA.24_1_12		TECPR1|25851	MIMAT0000267&MI0000286&hsa-miR-210-3p&offsets|0|0|CTGTGCGTGTGACAGCGGCTGA	chr1.trna69-AspGTC@52.75CCA.24_1_12
-	-	-		EZH2|2146	MIMAT0001536&MI0001641&hsa-miR-429&offsets|0|0|TAATACTGTCTGGTAAAACCGT	chrMT.trnaMT-GluTTC@39.63.25_1_2		HMGA1|3159	MIMAT0000071&MI0000071&hsa-miR-17-3p&offsets|+1|0|CTGCAGTGAAGGCACTTGTAG	-		HOOK2|29911	MIMAT0000765&MI0000816&hsa-miR-335-5p&offsets|0|-1|TCAAGAGCAATAACGAAAAATG	chrMT.trnaMT-GluTTC@40.61.22_1_2
-	-	-		COL11A1|1301	MIMAT0000095&MI0000098&hsa-miR-96-5p&offsets|0|-1|TTTGGCACTAGCACATTTTTGC	chr7.trna5-CysGCA@9.32.24_2_8|Out		TOP2A|7153	MIMAT0000460&MI0000732&hsa-miR-194-5p&offsets|0|+1|TGTAACAGCAACTCCATGTGGAA	-		DDX54|79039	MIMAT0000689&MI0000746&hsa-miR-99b-5p&offsets|0|-7|CACCCGTAGAACCGA	chrMT.trnaMT-GluTTC@39.61.23_1_2
-	-	-		TUBA1C|84790	MIMAT0022692&MI0000270&hsa-miR-181b-3p&offsets|0|-1|CTCACTGAACAATGAATGCA	chr11.trna17-ValTAC@1.26.26_1_2		ADRM1|11047	MIMAT0005951&MI0006444&hsa-miR-1307-3p&offsets|0|+2|ACTCGGCGTGGCGTCGGTCGTGGT	-		KAT2A|2648	MIMAT0000267&MI0000286&hsa-miR-210-3p&offsets|0|-2|CTGTGCGTGTGACAGCGGCT	chrMT.trnaMT-TyrGTA@13.32.20_1_1|Out
-	-	-		KIF23|9493	MIMAT0004586&MI0000438&hsa-miR-15b-3p&offsets|0|-1|CGAATCATTATTTGCTGCTCT	chr6.trna16-TyrGTA@32.50.19_1_12		ESPL1|9700	MIMAT0000261&MI0000273&hsa-miR-183-5p&offsets|-2|-2|TGTATGGCACTGGTAGAATTCA	-		NOTCH1|4851	MIMAT0002871&MI0003184&hsa-miR-500a-3p&offsets|+1|+1|TGCACCTGGGCAAGGATTCTGA	chr1.trna69-AspGTC@50.75CCA.26_1_12
-	-	-		TK1|7083	MIMAT0000076&MI0000077&hsa-miR-21-5p&offsets|+2|+1|GCTTATCAGACTGATGTTGAC	chrMT.trnaMT-ProTGG@52.70CC.19_1_1|Out		SLC19A1|6573	MIMAT0005951&MI0006444&hsa-miR-1307-3p&offsets|+1|0|CTCGGCGTGGCGTCGGTCGTG	-		ATAD3B|83858	MIMAT0000097&MI0000101&hsa-miR-99a-5p&offsets|+2|-1|CCCGTAGATCCGATCTTGT	chrMT.trnaMT-ValTAC@56.71CC.16_1_1|Out
-	-	-		MAD2L1|4085	MIMAT0000646&MI0000681&hsa-miR-155-5p&offsets|0|+1|TTAATGCTAATCGTGATAGGGGTT	chrMT.trnaMT-GluTTC@40.61.22_1_2		DTL|51514	MIMAT0000267&MI0000286&hsa-miR-210-3p&offsets|0|-1|CTGTGCGTGTGACAGCGGCTG	-		CAPN3|825	MIMAT0000256&MI0000289&hsa-miR-181a-5p&offsets|+1|0,MIMAT0000256&MI0000269&hsa-miR-181a-5p&offsets|+1|0|ACATTCAACGCTGTCGGTGAGT	chrMT.trnaMT-ValTAC@56.72CCA.17_1_1
-	-	-		E2F1|1869	MIMAT0000434&MI0000458&hsa-miR-142-3p&offsets|0|-1|TGTAGTGTTTCCTACTTTATGG	chr1.trna32-MetCAT@35.56.22_1_8		TRIP13|9319	MIMAT0000070&MI0000071&hsa-miR-17-5p&offsets|0|+1|CAAAGTGCTTACAGTGCAGGTAGT	-		SFI1|9814	MIMAT0003393&MI0001448&hsa-miR-425-5p&offsets|+2|0|TGACACGATCACTCCCGTTGA	chrMT.trnaMT-ProTGG@55.70CC.16_1_1|Out
-	-	-		ECE2|9718	MIMAT0004678&MI0000746&hsa-miR-99b-3p&offsets|0|-3|CAAGCTCGTGTCTGTGGGT	chr17.trna16-GlnTTG@10.33.24_2_12|Out		NDC80|10403	MIMAT0000680&MI0000734&hsa-miR-106b-5p&offsets|0|+1|TAAAGTGCTGACAGTGCAGATA	-		PPOX|5498	MIMAT0004502&MI0000086&hsa-miR-28-3p&offsets|+2|0|CTAGATTGTGAGCTCCTGGA	chr15.trna7-GlnCTG@15.34.20_1_7|Out
-	-	-		CDC6|990	MIMAT0000261&MI0000273&hsa-miR-183-5p&offsets|+1|-1|ATGGCACTGGTAGAATTCAC	chr1.trna116-GluCTC@1.29.29_1_8|Out		TUBA1C|84790	MIMAT0000617&MI0000650&hsa-miR-200c-3p&offsets|0|0|TAATACTGCCGGGTAATGATGGA	-		DMPK|1760	MIMAT0000689&MI0000746&hsa-miR-99b-5p&offsets|+2|0|CCCGTAGAACCGACCTTGCG	chrMT.trnaMT-ValTAC@50.72CCA.23_1_1
-	-	-		FANCA|2175	MIMAT0000076&MI0000077&hsa-miR-21-5p&offsets|+1|+1|AGCTTATCAGACTGATGTTGAC	chrMT.trnaMT-ProTGG@48.70CC.23_1_1		HN1|51155	MIMAT0000441&MI0000466&hsa-miR-9-5p&offsets|0|0,MIMAT0000441&MI0000468&hsa-miR-9-5p&offsets|0|0,MIMAT0000441&MI0000467&hsa-miR-9-5p&offsets|0|0|TCTTTGGTTATCTAGCTGTATGA	-		EXTL1|2134	MIMAT0000078&MI0000079&hsa-miR-23a-3p&offsets|+1|0|TCACATTGCCAGGGATTTCC	chr15.trna7-GlnCTG@13.34.22_1_7|Out
-	-	-		STIL|6491	MIMAT0000222&MI0000234&hsa-miR-192-5p&offsets|+1|+2|TGACCTATGAATTGACAGCCAG	chr1.trna85-ValCAC@1.30.30_2_15|Out		TUBB3|10381	MIMAT0000424&MI0000447&hsa-miR-128-3p&offsets|0|0,MIMAT0000424&MI0000727&hsa-miR-128-3p&offsets|0|0|TCACAGTGAACCGGTCTCTTT	-		ANAPC2|29882	MIMAT0000078&MI0000079&hsa-miR-23a-3p&offsets|+2|+1|CACATTGCCAGGGATTTCCA	chr1.trna35-GlyGCC@9.32.24_4_18|Out
-	-	-		LMNB1|4001	MIMAT0000682&MI0000737&hsa-miR-200a-3p&offsets|0|+1|TAACACTGTCTGGTAACGATGTT	chr17.trna42-LeuTAG@1.21.21_2_9		EZH2|2146	MIMAT0000261&MI0000273&hsa-miR-183-5p&offsets|-2|-1|TGTATGGCACTGGTAGAATTCAC	-		PPAN|56342	MIMAT0000259&MI0000272&hsa-miR-182-5p&offsets|+1|0|TTGGCAATGGTAGAACTCACACT	chrMT.trnaMT-ValTAC@43.71CC.29_1_1
-	-	-		UHRF1|29128	MIMAT0000688&MI0000745&hsa-miR-301a-3p&offsets|0|0|CAGTGCAATAGTATTGTCAAAGC	chr1.trna111-HisGTG@8.31.24_1_10		ZWINT|11130	MIMAT0000075&MI0000076&hsa-miR-20a-5p&offsets|0|+1|TAAAGTGCTTATAGTGCAGGTAGT	-		ADAMTSL4|54507	MIMAT0000435&MI0000459&hsa-miR-143-3p&offsets|+1|-3|GAGATGAAGCACTGTAG	chrMT.trnaMT-GluTTC@39.66.28_1_2
-	-	-		DTL|51514	MIMAT0000318&MI0000342&hsa-miR-200b-3p&offsets|0|+1|TAATACTGCCTGGTAATGATGAC	chrMT.trnaMT-GluTTC@40.63.24_1_2		GINS1|9837	MIMAT0000070&MI0000071&hsa-miR-17-5p&offsets|0|0|CAAAGTGCTTACAGTGCAGGTAG	-		DHX37|57647	MIMAT0000099&MI0000103&hsa-miR-101-3p&offsets|+1|-1,MIMAT0000099&MI0000739&hsa-miR-101-3p&offsets|+1|-1|ACAGTACTGTGATAACTGA	chr1.trna69-AspGTC@52.73C.22_1_12
-	-	-		HN1|51155	MIMAT0000076&MI0000077&hsa-miR-21-5p&offsets|0|+4|TAGCTTATCAGACTGATGTTGACTGT	chrMT.trnaMT-ProTGG@54.70CC.17_1_1|Out		LRFN4|78999	MIMAT0000417&MI0000438&hsa-miR-15b-5p&offsets|0|-1|TAGCAGCACATCATGGTTTAC	-		QTRT1|81890	MIMAT0003393&MI0001448&hsa-miR-425-5p&offsets|+1|-2|ATGACACGATCACTCCCGTT	chrMT.trnaMT-GluTTC@39.57.19_1_2
-	-	-		RECQL4|9401	MIMAT0000434&MI0000458&hsa-miR-142-3p&offsets|+1|-1|GTAGTGTTTCCTACTTTATGG	chr1.trna68-GlyGCC@1.23.23_2_10|Out		NCAPG|64151	MIMAT0000075&MI0000076&hsa-miR-20a-5p&offsets|0|0|TAAAGTGCTTATAGTGCAGGTAG	-		IRAK1|3654	MIMAT0000097&MI0000101&hsa-miR-99a-5p&offsets|+1|-1|ACCCGTAGATCCGATCTTGT	chr1.trna68-GlyGCC@1.20.20_2_10|Out
-	-	-		CIT|11113	MIMAT0003258&MI0003602&hsa-miR-590-5p&offsets|0|0|GAGCTTATTCATAAAAGTGCAG	chr1.trna111-HisGTG@15.35.21_1_9		RPL39L|116832	MIMAT0000434&MI0000458&hsa-miR-142-3p&offsets|+1|0|GTAGTGTTTCCTACTTTATGGA	-		ZNF598|90850	MIMAT0000435&MI0000459&hsa-miR-143-3p&offsets|+3|-1|GATGAAGCACTGTAGCT	chr17.trna16-GlnTTG@15.31.17_2_12|Out
-	-	-		PAQR4|124222	MIMAT0000261&MI0000273&hsa-miR-183-5p&offsets|+2|+1|TGGCACTGGTAGAATTCACTG	chr1.trna35-GlyGCC@13.34.22_1_13|Out		LMNB2|84823	MIMAT0000440&MI0000465&hsa-miR-191-5p&offsets|0|+1|CAACGGAATCCCAAAAGCAGCTGT	-		GRK6|2870	MIMAT0000689&MI0000746&hsa-miR-99b-5p&offsets|+1|-1|ACCCGTAGAACCGACCTTGC	chr1.trna69-AspGTC@52.74CC.23_1_12
-	-	-		RACGAP1|29127	MIMAT0000076&MI0000077&hsa-miR-21-5p&offsets|+4|0|TTATCAGACTGATGTTGA	chr1.trna34-LeuCAG@1.30.30_1_9|Out		SLC39A4|55630	MIMAT0004692&MI0000802&hsa-miR-340-5p&offsets|0|-1|TTATAAAGCAATGAGACTGAT	-		WDR46|9277	MIMAT0000092&MI0000093&hsa-miR-92a-3p&offsets|+2|0,MIMAT0000092&MI0000094&hsa-miR-92a-3p&offsets|+2|0|TTGCACTTGTCCCGGCCTGT	chr17.trna42-LeuTAG@1.19.19_2_9
-	-	-		FANCI|55215	MIMAT0000076&MI0000077&hsa-miR-21-5p&offsets|0|-4|TAGCTTATCAGACTGATG	chr1.trna35-GlyGCC@9.34.26_1_13|Out		BUB1B|701	MIMAT0000270&MI0000289&hsa-miR-181a-3p&offsets|0|-2|ACCATCGACCGTTGATTGTA	-		NEURL4|84461	MIMAT0000617&MI0000650&hsa-miR-200c-3p&offsets|+3|0|TACTGCCGGGTAATGATGGA	chr15.trna7-GlnCTG@60.75CCA.16_1_11
-	-	-		ZWINT|11130	MIMAT0000091&MI0000091&hsa-miR-33a-5p&offsets|0|-1|GTGCATTGTAGTTGCATTGC	chr1.trna35-GlyGCC@10.34.25_1_13|Out		PYCR1|5831	MIMAT0000424&MI0000447&hsa-miR-128-3p&offsets|0|+1|TCACAGTGAACCGGTCTCTTTT	-		SULT1A3|6818	MIMAT0000078&MI0000079&hsa-miR-23a-3p&offsets|+1|-1|TCACATTGCCAGGGATTTC	chrMT.trnaMT-ValTAC@40.68.29_1_1|Out
-	-	-		ESPL1|9700	MIMAT0000261&MI0000273&hsa-miR-183-5p&offsets|0|-1|TATGGCACTGGTAGAATTCAC	chr1.trna68-GlyGCC@1.28.28_2_10|Out		HDGF|3068	MIMAT0000691&MI0000748&hsa-miR-130b-3p&offsets|0|0|CAGTGCAATGATGAAAGGGCAT	-		CHTF18|63922	MIMAT0000062&MI0000061&hsa-let-7a-5p&offsets|+3|0,MIMAT0000062&MI0000062&hsa-let-7a-5p&offsets|+3|0,MIMAT0000062&MI0000060&hsa-let-7a-5p&offsets|+3|0|GGTAGTAGGTTGTATAGTT	chr15.trna7-GlnCTG@23.41.19_1_13|Out
-	-	-		CENPW|387103	MIMAT0004494&MI0000077&hsa-miR-21-3p&offsets|0|-5|CAACACCAGTCGATGG	chr1.trna35-GlyGCC@16.31.16_4_21|Out		LSM4|25804	MI0000809&hsa-mir-151a&coords|8|-|141742721|141742743|CTCGAGGAGCTCACAGTCTAGTA	-		MGC29506|51237	MIMAT0000259&MI0000272&hsa-miR-182-5p&offsets|+1|+1|TTGGCAATGGTAGAACTCACACTG	chr1.trna68-GlyGCC@1.24.24_2_10|Out
-	-	-		SMC4|10051	MIMAT0000076&MI0000077&hsa-miR-21-5p&offsets|0|-3|TAGCTTATCAGACTGATGT	chr11.trna17-ValTAC@1.23.23_1_3		FEN1|2237	MIMAT0000081&MI0000082&hsa-miR-25-3p&offsets|0|+1|CATTGCACTTGTCTCGGTCTGAC	-		MYBBP1A|10514	MIMAT0004499&MI0000083&hsa-miR-26a-1-3p&offsets|0|0|CCTATTCTTGGTTACTTGCACG	chr7.trna5-CysGCA@7.32.26_2_7|Out
-	-	-		GJB2|2706	MIMAT0004678&MI0000746&hsa-miR-99b-3p&offsets|0|-2|CAAGCTCGTGTCTGTGGGTC	chr14.trna1-LeuAAG@37.60.24_2_7		MAD2L1|4085	MIMAT0000441&MI0000466&hsa-miR-9-5p&offsets|0|-2,MIMAT0000441&MI0000468&hsa-miR-9-5p&offsets|0|-2,MIMAT0000441&MI0000467&hsa-miR-9-5p&offsets|0|-2|TCTTTGGTTATCTAGCTGTAT	-		TMC8|147138	MIMAT0000253&MI0000266&hsa-miR-10a-5p&offsets|+2|0|CCCTGTAGATCCGAATTTGTG	chr6.trna51-SerTGA@1.23.23_2_12
-	-	-		H2AFZ|3015	MIMAT0000081&MI0000082&hsa-miR-25-3p&offsets|0|+1|CATTGCACTTGTCTCGGTCTGAC	chrMT.trnaMT-ProTGG@47.70CC.24_1_1		THOC4|10189	MIMAT0001620&MI0000737&hsa-miR-200a-5p&offsets|0|0|CATCTTACCGGACAGTGCTGGA	-		ZGPAT|84619	MIMAT0000062&MI0000061&hsa-let-7a-5p&offsets|+1|-2,MIMAT0000062&MI0000062&hsa-let-7a-5p&offsets|+1|-2,MIMAT0000062&MI0000060&hsa-let-7a-5p&offsets|+1|-2|GAGGTAGTAGGTTGTATAG	chr15.trna7-GlnCTG@1.23.23_1_7|Out
-	-	-		CTPS|1503	MIMAT0004494&MI0000077&hsa-miR-21-3p&offsets|0|-4|CAACACCAGTCGATGGG	chr1.trna68-GlyGCC@1.29.29_2_10|Out		SLC16A3|9123	MIMAT0000256&MI0000289&hsa-miR-181a-5p&offsets|0|+1,MIMAT0000256&MI0000269&hsa-miR-181a-5p&offsets|0|+1|AACATTCAACGCTGTCGGTGAGTT	-		KCNAB2|8514	MIMAT0003393&MI0001448&hsa-miR-425-5p&offsets|+2|+1|TGACACGATCACTCCCGTTGAG	chr1.trna35-GlyGCC@9.34.26_1_13|Out
-	-	-		SLC7A5|8140	MIMAT0000259&MI0000272&hsa-miR-182-5p&offsets|+5|0|CAATGGTAGAACTCACACT	chr1.trna111-HisGTG@8.29.22_1_10|Out		DEPDC1|55635	MIMAT0003218&MI0003560&hsa-miR-92b-3p&offsets|0|-2|TATTGCACTCGTCCCGGCCT	-		KIAA1274|27143	MIMAT0000728&MI0000783&hsa-miR-375&offsets|0|-3|TTTGTTCGTTCGGCTCGCG	chr6.trna16-TyrGTA@1.25.25_1_3|Out
-	-	-		DDX39|10212	MIMAT0000259&MI0000272&hsa-miR-182-5p&offsets|+1|+1|TTGGCAATGGTAGAACTCACACTG	chrMT.trnaMT-GluTTC@39.59.21_1_2		LSR|51599	MIMAT0000078&MI0000079&hsa-miR-23a-3p&offsets|0|+2|ATCACATTGCCAGGGATTTCCAA	-		PWWP2B|170394	MIMAT0000078&MI0000079&hsa-miR-23a-3p&offsets|+2|0|CACATTGCCAGGGATTTCC	chrMT.trnaMT-ValTAC@48.72CCA.25_1_1
-	-	-		TUBB3|10381	MIMAT0000440&MI0000465&hsa-miR-191-5p&offsets|0|+1|CAACGGAATCCCAAAAGCAGCTGT	chrMT.trnaMT-ValTAC@50.70C.21_1_1		CFL1|1072	MIMAT0004559&MI0000271&hsa-miR-181c-3p&offsets|+1|+1|ACCATCGACCGTTGAGTGGACC	-		LOC146880|146880	MIMAT0000261&MI0000273&hsa-miR-183-5p&offsets|+1|-3|ATGGCACTGGTAGAATTC	chr7.trna5-CysGCA@7.34.28_1_6|Out
-	-	-		MLF1IP|79682	MIMAT0000093&MI0000095&hsa-miR-93-5p&offsets|0|0|CAAAGTGCTGTTCGTGCAGGTAG	chr16.trna15-ThrCGT@1.24.24_1_2		SCAMP3|10067	MIMAT0000104&MI0000114&hsa-miR-107&offsets|0|-1|AGCAGCATTGTACAGGGCTATC	-		TOP1MT|116447	MIMAT0000254&MI0000267&hsa-miR-10b-5p&offsets|+2|-2|CCCTGTAGAACCGAATTTG	chr1.trna111-HisGTG@16.35.20_1_9
-	-	-		TYMS|7298	MIMAT0000261&MI0000273&hsa-miR-183-5p&offsets|-2|-3|TGTATGGCACTGGTAGAATTC	chr1.trna85-ValCAC@1.20.20_2_17|Out		STMN1|3925	MIMAT0001620&MI0000737&hsa-miR-200a-5p&offsets|+1|+1|ATCTTACCGGACAGTGCTGGAT	-		IER2|9592	MIMAT0000065&MI0000065&hsa-let-7d-5p&offsets|+1|0|GAGGTAGTAGGTTGCATAGTT	chr17.trna16-GlnTTG@16.31.16_2_12|Out
-	-	-		CDT1|81620	MIMAT0000646&MI0000681&hsa-miR-155-5p&offsets|0|0|TTAATGCTAATCGTGATAGGGGT	chrMT.trnaMT-LeuTAA@1.21.21_1_1		PFDN2|5202	MIMAT0000267&MI0000286&hsa-miR-210-3p&offsets|0|-2|CTGTGCGTGTGACAGCGGCT	-		CABC1|56997	MIMAT0018073&MI0016053&hsa-miR-3653&offsets|-2|0|CTCTAAGAAGTTGACTGAAG	chr17.trna16-GlnTTG@16.33.18_2_12|Out
-	-	-		GPR172A|79581	MIMAT0000261&MI0000273&hsa-miR-183-5p&offsets|+2|+2|TGGCACTGGTAGAATTCACTGT	chrMT.trnaMT-ValTAC@50.71CC.22_1_1		CDCA7|83879	MIMAT0004680&MI0000748&hsa-miR-130b-5p&offsets|0|+1|ACTCTTTCCCTGTTGCACTACT	-		AGXT2L2|85007	MIMAT0000084&MI0000085&hsa-miR-27a-3p&offsets|+1|0|TCACAGTGGCTAAGTTCCGC	chrMT.trnaMT-ValTAC@49.72CCA.24_1_1
-	-	-		DCAF13|25879	MIMAT0001536&MI0001641&hsa-miR-429&offsets|0|-1|TAATACTGTCTGGTAAAACCG	chr1.trna68-GlyGCC@1.30.30_2_10|Out		NFKBIL2|4796	MIMAT0000757&MI0000809&hsa-miR-151a-3p&offsets|-2|0|TACTAGACTGAAGCTCCTTGAGG	-		RHPN1|114822	MIMAT0003393&MI0001448&hsa-miR-425-5p&offsets|+1|-1|ATGACACGATCACTCCCGTTG	chrMT.trnaMT-GluTTC@42.71CC.30_1_2
-	-	-		PRAME|23532	MIMAT0000091&MI0000091&hsa-miR-33a-5p&offsets|0|0|GTGCATTGTAGTTGCATTGCA	chrMT.trnaMT-ProTGG@53.70CC.18_1_1|Out		C1orf85|112770	MIMAT0000071&MI0000071&hsa-miR-17-3p&offsets|0|0|ACTGCAGTGAAGGCACTTGTAG	-		TTC38|55020	MIMAT0000243&MI0000253&hsa-miR-148a-3p&offsets|+1|-1|CAGTGCACTACAGAACTTTG	chrMT.trnaMT-ValTAC@53.71CC.19_1_1
-	-	-		DBF4|10926	MIMAT0000261&MI0000273&hsa-miR-183-5p&offsets|+2|0|TGGCACTGGTAGAATTCACT	chr6.trna110-AlaTGC@1.19.19_5_13		BAK1|578	MIMAT0004797&MI0003589&hsa-miR-582-3p&offsets|0|-2|TAACTGGTTGAACAACTGAA	-		CYTH1|9267	MIMAT0000098&MI0000102&hsa-miR-100-5p&offsets|+2|-1|CCCGTAGATCCGAACTTGT	chrMT.trnaMT-ProTGG@49.71CCA.23_1_1
-	-	-		DONSON|29980	MI0000809&hsa-mir-151a&coords|8|-|141742721|141742743|CTCGAGGAGCTCACAGTCTAGTA	chr1.trna116-GluCTC@1.22.22_1_8|Out		CKS2|1164	MIMAT0000757&MI0000809&hsa-miR-151a-3p&offsets|-2|-1|TACTAGACTGAAGCTCCTTGAG	-		ZC3H12A|80149	MIMAT0000063&MI0000063&hsa-let-7b-5p&offsets|+3|+1|GGTAGTAGGTTGTGTGGTTT	chr17.trna16-GlnTTG@15.32.18_2_12|Out
-	-	-		FEN1|2237	MIMAT0004784&MI0003513&hsa-miR-455-3p&offsets|0|0|GCAGTCCATGGGCATATACAC	chrMT.trnaMT-ValTAC@47.71CC.25_1_1		MKI67|4288	MIMAT0000073&MI0000073&hsa-miR-19a-3p&offsets|0|0|TGTGCAAATCTATGCAAAACTGA	-		DFNB31|25861	MIMAT0000254&MI0000267&hsa-miR-10b-5p&offsets|+2|+1|CCCTGTAGAACCGAATTTGTGT	chrMT.trnaMT-ValTAC@48.71CC.24_1_1
-	-	-		HDGF|3068	MIMAT0022692&MI0000270&hsa-miR-181b-3p&offsets|0|0|CTCACTGAACAATGAATGCAA	chr17.trna16-GlnTTG@13.33.21_2_12|Out		MRPL14|64928	MIMAT0000688&MI0000745&hsa-miR-301a-3p&offsets|0|-1|CAGTGCAATAGTATTGTCAAAG	-		MYC|4609	MIMAT0002881&MI0005530&hsa-miR-509-3p&offsets|0|0,MIMAT0002881&MI0005717&hsa-miR-509-3p&offsets|0|0,MIMAT0002881&MI0003196&hsa-miR-509-3p&offsets|0|0|TGATTGGTACGTCTGTGGGTAG	chrMT.trnaMT-ValTAC@52.72CCA.21_1_1
-	-	-		SNRPA1|6627	MIMAT0003218&MI0003560&hsa-miR-92b-3p&offsets|0|-2|TATTGCACTCGTCCCGGCCT	chr1.trna35-GlyGCC@14.34.21_1_13|Out		MMP11|4320	MIMAT0000080&MI0000081&hsa-miR-24-3p&offsets|-1|0,MIMAT0000080&MI0000080&hsa-miR-24-3p&offsets|-1|0|CTGGCTCAGTTCAGCAGGAACAG	-		ALKBH7|84266	MIMAT0000063&MI0000063&hsa-let-7b-5p&offsets|+4|0|GTAGTAGGTTGTGTGGTT	chr1.trna111-HisGTG@4.30.27_1_9|Out
-	-	-		H2AFX|3014	MIMAT0000617&MI0000650&hsa-miR-200c-3p&offsets|0|+1|TAATACTGCCGGGTAATGATGGAG	chr1.trna69-AspGTC@50.75CCA.26_1_12		PSMA7|5688	MIMAT0000257&MI0000270&hsa-miR-181b-5p&offsets|0|+1,MIMAT0000257&MI0000683&hsa-miR-181b-5p&offsets|0|+1|AACATTCATTGCTGTCGGTGGGTT	-		CDK10|8558	MIMAT0000077&MI0000078&hsa-miR-22-3p&offsets|+1|-2|AGCTGCCAGTTGAAGAACT	chr6.trna83-LeuTAA@69.86CCA.18_1_1|Out
-	-	-		HMGA1|3159	MIMAT0001620&MI0000737&hsa-miR-200a-5p&offsets|+1|+1|ATCTTACCGGACAGTGCTGGAT	chr16.trna15-ThrCGT@1.22.22_1_2		KPNA2|3838	MIMAT0000510&MI0000542&hsa-miR-320a&offsets|+2|+2|AAGCTGGGTTGAGAGGGCGAAA	-		NSUN5P2|260294	MIMAT0000253&MI0000266&hsa-miR-10a-5p&offsets|+3|-1|CCTGTAGATCCGAATTTGT	chr1.trna68-GlyGCC@1.22.22_2_10|Out
-	-	-		RNASEH2A|10535	MIMAT0018101&MI0016078&hsa-miR-3677-3p&offsets|0|-1|CTCGTGGGCTCTGGCCACGGC	chr1.trna54-LysTTT@1.25.25_1_6		PLAUR|5329	MIMAT0005951&MI0006444&hsa-miR-1307-3p&offsets|0|+1|ACTCGGCGTGGCGTCGGTCGTGG	-		AHSA2|130872	MIMAT0000447&MI0000474&hsa-miR-134-5p&offsets|0|-1|TGTGACTGGTTGACCAGAGGG	chrMT.trnaMT-GluTTC@40.62.23_1_2
-	-	-		CALR|811	MIMAT0004494&MI0000077&hsa-miR-21-3p&offsets|0|+1|CAACACCAGTCGATGGGCTGTC	chr6.trna110-AlaTGC@1.18.18_5_13|Out		SAMD1|90378	MIMAT0000434&MI0000458&hsa-miR-142-3p&offsets|0|-1|TGTAGTGTTTCCTACTTTATGG	-		ATHL1|80162	MIMAT0001340&MI0001445&hsa-miR-423-3p&offsets|+1|0|GCTCGGTCTGAGGCCCCTCAGT	chrMT.trnaMT-ValTAC@47.71CC.25_1_1
-	-	-		PCNA|5111	MIMAT0000073&MI0000073&hsa-miR-19a-3p&offsets|0|0|TGTGCAAATCTATGCAAAACTGA	chr16.trna11-ProAGG@1.25.25_3_19|Out		CENPW|387103	MIMAT0000076&MI0000077&hsa-miR-21-5p&offsets|+3|0|CTTATCAGACTGATGTTGA	-		ALS2CL|259173	MIMAT0000076&MI0000077&hsa-miR-21-5p&offsets|+2|-1|GCTTATCAGACTGATGTTG	chr13.trna3-GluTTC@1.23.23_1_2
-	-	-		GGH|8836	MIMAT0000259&MI0000272&hsa-miR-182-5p&offsets|0|-1|TTTGGCAATGGTAGAACTCACAC	chr1.trna35-GlyGCC@10.31.22_4_18|Out		GIPC1|10755	MIMAT0005951&MI0006444&hsa-miR-1307-3p&offsets|+1|+1|CTCGGCGTGGCGTCGGTCGTGG	-		TYMP|1890	MI0000469&hsa-mir-125a&coords|19|+|52196501|52196520|CCATGTTGCCAGTCTCTAGG	chr17.trna16-GlnTTG@15.35.21_1_5
-	-	-		NFKBIL2|4796	MIMAT0000264&MI0000283&hsa-miR-203a&offsets|-1|0|TGTGAAATGTTTAGGACCACTAG	chr16.trna11-ProAGG@1.30.30_3_18|Out		SLC35A2|7355	MIMAT0004784&MI0003513&hsa-miR-455-3p&offsets|0|0|GCAGTCCATGGGCATATACAC	-		HMHA1|23526	MIMAT0003393&MI0001448&hsa-miR-425-5p&offsets|+1|0|ATGACACGATCACTCCCGTTGA	chrMT.trnaMT-GluTTC@49.72CCA.24_1_2
-	-	-		PPP1R14B|26472	MIMAT0000772&MI0000825&hsa-miR-345-5p&offsets|0|-1|GCTGACTCCTAGTCCAGGGCT	chr1.trna35-GlyGCC@15.34.20_1_13|Out		PAFAH1B3|5050	MIMAT0000692&MI0000749&hsa-miR-30e-5p&offsets|0|+2|TGTAAACATCCTTGACTGGAAGCT	-		LOC150776|150776	MIMAT0004604&MI0000472&hsa-miR-127-5p&offsets|0|-2|CTGAAGCTCAGAGGGCTCTG	chr1.trna54-LysTTT@1.25.25_1_6
-	-	-		FAM111B|374393	MIMAT0000262&MI0000274&hsa-miR-187-3p&offsets|0|0|TCGTGTCTTGTGTTGCAGCCGG	chr1.trna34-LeuCAG@71.86CCA.16_1_7|Out		SMOX|54498	MIMAT0000257&MI0000270&hsa-miR-181b-5p&offsets|0|-3,MIMAT0000257&MI0000683&hsa-miR-181b-5p&offsets|0|-3|AACATTCATTGCTGTCGGTG	-		DNASE1L1|1774	MIMAT0017985&MI0015997&hsa-miR-3607-3p&offsets|+1|0|CTGTAAACGCTTTCTGATG	chr15.trna4-ArgTCG@1.24.24_2_4
-	-	-		MCM2|4171	MIMAT0000646&MI0000681&hsa-miR-155-5p&offsets|0|-1|TTAATGCTAATCGTGATAGGGG	chr11.trna16-ValTAC@1.20.20_1_1		FLAD1|80308	MIMAT0002821&MI0003139&hsa-miR-181d-5p&offsets|0|-2|AACATTCATTGTTGTCGGTGG	-		SCRIB|23513	MIMAT0000231&MI0000281&hsa-miR-199a-5p&offsets|+1|0,MIMAT0000231&MI0000242&hsa-miR-199a-5p&offsets|+1|0|CCAGTGTTCAGACTACCTGTTC	chrMT.trnaMT-ValTAC@42.71CC.30_1_1
-	-	-		SUV39H2|79723	MIMAT0000076&MI0000077&hsa-miR-21-5p&offsets|+2|0|GCTTATCAGACTGATGTTGA	chr6.trna83-LeuTAA@1.25.25_1_1		RHBDF2|79651	MIMAT0000257&MI0000270&hsa-miR-181b-5p&offsets|0|-2,MIMAT0000257&MI0000683&hsa-miR-181b-5p&offsets|0|-2|AACATTCATTGCTGTCGGTGG	-		WDR85|92715	MIMAT0000728&MI0000783&hsa-miR-375&offsets|0|-4|TTTGTTCGTTCGGCTCGC	chrMT.trnaMT-ValTAC@47.72CCA.26_1_1
-	-	-		GINS4|84296	MIMAT0000692&MI0000749&hsa-miR-30e-5p&offsets|+1|+4|GTAAACATCCTTGACTGGAAGCTGT	chrMT.trnaMT-ValTAC@45.71CC.27_1_1		FANCA|2175	MIMAT0004799&MI0003599&hsa-miR-589-5p&offsets|0|+1|TGAGAACCACGTCTGCTCTGAGC	-		PSMD9|5715	MIMAT0000259&MI0000272&hsa-miR-182-5p&offsets|+5|-2|CAATGGTAGAACTCACA	chr17.trna16-GlnTTG@13.33.21_2_12|Out
-	-	-		MCM4|4173	MIMAT0000759&MI0000811&hsa-miR-148b-3p&offsets|0|-1|TCAGTGCATCACAGAACTTTG	chr1.trna111-HisGTG@9.32.24_1_9		KIF11|3832	MIMAT0000750&MI0000802&hsa-miR-340-3p&offsets|0|0|TCCGTCTCAGTTACTTTATAGC	-		RUNX3|864	MIMAT0000076&MI0000077&hsa-miR-21-5p&offsets|+2|0|GCTTATCAGACTGATGTTGA	chr16.trna15-ThrCGT@1.22.22_1_2
-	-	-		RCC2|55920	MIMAT0000646&MI0000681&hsa-miR-155-5p&offsets|0|+2|TTAATGCTAATCGTGATAGGGGTTT	chr1.trna68-GlyGCC@1.27.27_2_10|Out		H2AFZ|3015	MIMAT0000433&MI0000458&hsa-miR-142-5p&offsets|0|-2|CATAAAGTAGAAAGCACTA	-		ARHGEF2|9181	MIMAT0000772&MI0000825&hsa-miR-345-5p&offsets|0|0|GCTGACTCCTAGTCCAGGGCTC	chr15.trna7-GlnCTG@10.34.25_1_7|Out
-	-	-		ALG3|10195	MIMAT0000090&MI0000090&hsa-miR-32-5p&offsets|0|-1|TATTGCACATTACTAAGTTGC	chr1.trna116-GluCTC@1.26.26_1_8|Out		CCDC137|339230	MIMAT0005951&MI0006444&hsa-miR-1307-3p&offsets|+1|+2|CTCGGCGTGGCGTCGGTCGTGGT	-		FRMD8|83786	MIMAT0000076&MI0000077&hsa-miR-21-5p&offsets|0|-7|TAGCTTATCAGACTG	chr17.trna16-GlnTTG@19.40.22_1_5|Out
-	-	-		PLAUR|5329	MIMAT0000076&MI0000077&hsa-miR-21-5p&offsets|+1|0|AGCTTATCAGACTGATGTTGA	chr1.trna68-GlyGCC@1.20.20_2_10|Out		MAZ|4150	MIMAT0004784&MI0003513&hsa-miR-455-3p&offsets|0|-1|GCAGTCCATGGGCATATACA	-		TICAM1|148022	MIMAT0004502&MI0000086&hsa-miR-28-3p&offsets|+2|+1|CTAGATTGTGAGCTCCTGGAG	chr17.trna16-GlnTTG@14.30.17_2_13|Out
-	-	-		TPM3|7170	MIMAT0000261&MI0000273&hsa-miR-183-5p&offsets|+1|-3|ATGGCACTGGTAGAATTC	chr17.trna42-LeuTAG@1.20.20_2_9		MRPL12|6182	MIMAT0000261&MI0000273&hsa-miR-183-5p&offsets|-2|-3|TGTATGGCACTGGTAGAATTC	-		DHX30|22907	MIMAT0000267&MI0000286&hsa-miR-210-3p&offsets|0|+1|CTGTGCGTGTGACAGCGGCTGAT	chr1.trna68-GlyGCC@1.21.21_2_10|Out
-	-	-		ATAD2|29028	MIMAT0000101&MI0000108&hsa-miR-103a-3p&offsets|+2|-1,MIMAT0000101&MI0000109&hsa-miR-103a-3p&offsets|+2|-1|CAGCATTGTACAGGGCTATG	chr19.trna10-IleTAT@1.19.19_1_5|Out		PSMB4|5692	MIMAT0000455&MI0000482&hsa-miR-185-5p&offsets|0|0|TGGAGAGAAAGGCAGTTCCTGA	-		KIAA0664|23277	MIMAT0000077&MI0000078&hsa-miR-22-3p&offsets|+1|+1|AGCTGCCAGTTGAAGAACTGTT	chrMT.trnaMT-ValTAC@50.69.20_1_1|Out
-	-	-		DNAJB11|51726	MIMAT0017990&MI0016003&hsa-miR-3613-5p&offsets|0|-1|TGTTGTACTTTTTTTTTTGTT	chr1.trna85-ValCAC@1.26.26_2_16|Out		ARMC6|93436	MIMAT0000101&MI0000108&hsa-miR-103a-3p&offsets|+2|-1,MIMAT0000101&MI0000109&hsa-miR-103a-3p&offsets|+2|-1|CAGCATTGTACAGGGCTATG	-		DAPK3|1613	MIMAT0000423&MI0000446&hsa-miR-125b-5p&offsets|+1|0,MIMAT0000423&MI0000470&hsa-miR-125b-5p&offsets|+1|0|CCCTGAGACCCTAACTTGTGA	chr1.trna111-HisGTG@16.33.18_1_9
-	-	-		NUDT5|11164	MIMAT0000757&MI0000809&hsa-miR-151a-3p&offsets|-2|0|TACTAGACTGAAGCTCCTTGAGG	chr1.trna68-GlyGCC@1.22.22_2_10|Out		RFC4|5984	MIMAT0000757&MI0000809&hsa-miR-151a-3p&offsets|-1|0|ACTAGACTGAAGCTCCTTGAGG	-		BAHCC1|57597	MIMAT0000728&MI0000783&hsa-miR-375&offsets|+1|-1|TTGTTCGTTCGGCTCGCGTG	chr1.trna35-GlyGCC@9.30.22_4_18|Out
-	-	-		MTHFD2|10797	MIMAT0000104&MI0000114&hsa-miR-107&offsets|0|-1|AGCAGCATTGTACAGGGCTATC	chrMT.trnaMT-ValTAC@48.71CC.24_1_1		RBM38|55544	MIMAT0000424&MI0000447&hsa-miR-128-3p&offsets|0|-1,MIMAT0000424&MI0000727&hsa-miR-128-3p&offsets|0|-1|TCACAGTGAACCGGTCTCTT	-		ARMC6|93436	MIMAT0000447&MI0000474&hsa-miR-134-5p&offsets|0|0|TGTGACTGGTTGACCAGAGGGG	chr6.trna16-TyrGTA@32.50.19_1_12
-	-	-		RPL39L|116832	MIMAT0004784&MI0003513&hsa-miR-455-3p&offsets|0|-2|GCAGTCCATGGGCATATAC	chr5.trna15-ValAAC@1.20.20_1_1		CTPS|1503	MIMAT0000261&MI0000273&hsa-miR-183-5p&offsets|0|-2|TATGGCACTGGTAGAATTCA	-		TUBGCP6|85378	MIMAT0002819&MI0003137&hsa-miR-193b-3p&offsets|+1|0|ACTGGCCCTCAAAGTCCCGCT	chr1.trna116-GluCTC@1.26.26_1_8|Out
-	-	-		CCT3|7203	MIMAT0000434&MI0000458&hsa-miR-142-3p&offsets|+1|-2|GTAGTGTTTCCTACTTTATG	chr2.trna3-AlaAGC@60.76CCA.17_1_2|Out		STIL|6491	MIMAT0000222&MI0000234&hsa-miR-192-5p&offsets|0|+2|CTGACCTATGAATTGACAGCCAG	-		GTPBP3|84705	MIMAT0000710&MI0000767&hsa-miR-365a-3p&offsets|0|-2,MIMAT0022834&MI0000769&hsa-miR-365b-3p&offsets|0|-2|TAATGCCCCTAAAAATCCTT	chr19.trna2-GlyTCC@1.18.18_1_9|Out
-	-	-		MFAP2|4237	MIMAT0005951&MI0006444&hsa-miR-1307-3p&offsets|0|0|ACTCGGCGTGGCGTCGGTCGTG	chr1.trna32-MetCAT@34.53.20_1_9|Out		RPP21|79897	MIMAT0000258&MI0000271&hsa-miR-181c-5p&offsets|0|+1|AACATTCAACCTGTCGGTGAGTT	-		MAPK8IP3|23162	MIMAT0000076&MI0000077&hsa-miR-21-5p&offsets|+5|+2|TATCAGACTGATGTTGACT	chr1.trna116-GluCTC@51.75CCA.25_3_11
-	-	-		C6orf115|58527	MIMAT0003298&MI0003643&hsa-miR-629-3p&offsets|0|-1|GTTCTCCCAACGTAAGCCCAG	chr1.trna35-GlyGCC@12.30.19_4_18|Out		BOP1|23246	MIMAT0000078&MI0000079&hsa-miR-23a-3p&offsets|+1|+3|TCACATTGCCAGGGATTTCCAAC	-		PNPLA6|10908	MIMAT0000063&MI0000063&hsa-let-7b-5p&offsets|+4|+1|GTAGTAGGTTGTGTGGTTT	chr13.trna3-GluTTC@1.24.24_1_2
-	-	-		MRPL14|64928	MIMAT0000226&MI0000279&hsa-miR-196a-5p&offsets|0|0,MIMAT0000226&MI0000238&hsa-miR-196a-5p&offsets|0|0|TAGGTAGTTTCATGTTGTTGGG	chr1.trna111-HisGTG@4.28.25_1_9|Out		GGH|8836	MIMAT0000759&MI0000811&hsa-miR-148b-3p&offsets|0|-1|TCAGTGCATCACAGAACTTTG	-		SNRNP70|6625	MIMAT0018101&MI0016078&hsa-miR-3677-3p&offsets|0|-1|CTCGTGGGCTCTGGCCACGGC	chrMT.trnaMT-ValTAC@50.71CC.22_1_1
-	-	-		NME1|4830	MIMAT0000688&MI0000745&hsa-miR-301a-3p&offsets|0|-1|CAGTGCAATAGTATTGTCAAAG	chr17.trna16-GlnTTG@15.35.21_1_5		CIT|11113	MIMAT0000646&MI0000681&hsa-miR-155-5p&offsets|0|+1|TTAATGCTAATCGTGATAGGGGTT	-		UNC93B1|81622	MIMAT0000244&MI0000736&hsa-miR-30c-5p&offsets|0|-3,MIMAT0000244&MI0000254&hsa-miR-30c-5p&offsets|0|-3|TGTAAACATCCTACACTCTC	chr15.trna7-GlnCTG@23.40.18_1_13|Out
-	-	-		MMP13|4322	MIMAT0000080&MI0000081&hsa-miR-24-3p&offsets|-1|0,MIMAT0000080&MI0000080&hsa-miR-24-3p&offsets|-1|0|CTGGCTCAGTTCAGCAGGAACAG	chrMT.trnaMT-ValTAC@50.69.20_1_1|Out		BOLA2|552900	MIMAT0004927&MI0005543&hsa-miR-708-3p&offsets|0|+1|CAACTAGACTGTGAGCTTCTAGA	-		PILRB|29990	MIMAT0000765&MI0000816&hsa-miR-335-5p&offsets|0|0|TCAAGAGCAATAACGAAAAATGT	chrMT.trnaMT-GluTTC@40.57.18_1_2
-	-	-		LAGE3|8270	MIMAT0000432&MI0000457&hsa-miR-141-3p&offsets|0|0|TAACACTGTCTGGTAAAGATGG	chrMT.trnaMT-ValTAC@48.70C.23_1_1		NR2C2AP|126382	MIMAT0000434&MI0000458&hsa-miR-142-3p&offsets|+1|-1|GTAGTGTTTCCTACTTTATGG	-		PGS1|9489	MIMAT0000418&MI0000439&hsa-miR-23b-3p&offsets|+1|-1|TCACATTGCCAGGGATTAC	chrMT.trnaMT-ValTAC@53.70C.18_1_1
-	-	-		SLC35A2|7355	MIMAT0000264&MI0000283&hsa-miR-203a&offsets|+1|0|TGAAATGTTTAGGACCACTAG	chr15.trna7-GlnCTG@12.34.23_1_7|Out		CBX2|84733	MIMAT0000076&MI0000077&hsa-miR-21-5p&offsets|0|+5|TAGCTTATCAGACTGATGTTGACTGTT	-		WDR81|124997	MIMAT0004494&MI0000077&hsa-miR-21-3p&offsets|0|-5|CAACACCAGTCGATGG	chr17.trna42-LeuTAG@1.20.20_2_9
-	-	-		CDCA4|55038	MIMAT0000257&MI0000270&hsa-miR-181b-5p&offsets|0|-3,MIMAT0000257&MI0000683&hsa-miR-181b-5p&offsets|0|-3|AACATTCATTGCTGTCGGTG	chr1.trna111-HisGTG@16.33.18_1_9		C20orf20|55257	MIMAT0000091&MI0000091&hsa-miR-33a-5p&offsets|0|0|GTGCATTGTAGTTGCATTGCA	-		TRAF2|7186	MIMAT0000063&MI0000063&hsa-let-7b-5p&offsets|+3|0|GGTAGTAGGTTGTGTGGTT	chr17.trna41-SerCGA@1.25.25_1_2
-	-	-		C15orf23|90417	MIMAT0000757&MI0000809&hsa-miR-151a-3p&offsets|-1|-1|ACTAGACTGAAGCTCCTTGAG	chr1.trna68-GlyGCC@1.19.19_2_10|Out		SLC6A9|6536	MIMAT0000434&MI0000458&hsa-miR-142-3p&offsets|0|0|TGTAGTGTTTCCTACTTTATGGA	-		NBEAL2|23218	MIMAT0000254&MI0000267&hsa-miR-10b-5p&offsets|0|-7|TACCCTGTAGAACCGA	chr7.trna5-CysGCA@9.32.24_2_8|Out
-	-	-		TUBB|203068	MIMAT0000259&MI0000272&hsa-miR-182-5p&offsets|0|-6|TTTGGCAATGGTAGAACT	chr17.trna42-LeuTAG@1.24.24_2_9		RACGAP1|29127	MIMAT0001620&MI0000737&hsa-miR-200a-5p&offsets|0|-2|CATCTTACCGGACAGTGCTG	-		TAF1C|9013	MIMAT0000062&MI0000061&hsa-let-7a-5p&offsets|+4|0,MIMAT0000062&MI0000062&hsa-let-7a-5p&offsets|+4|0,MIMAT0000062&MI0000060&hsa-let-7a-5p&offsets|+4|0|GTAGTAGGTTGTATAGTT	chr14.trna13-LysCTT@1.25.25_1_9
-	-	-		KIAA1199|57214	MIMAT0000222&MI0000234&hsa-miR-192-5p&offsets|0|+2|CTGACCTATGAATTGACAGCCAG	chr17.trna42-LeuTAG@1.26.26_2_9		TOMM40|10452	MIMAT0000084&MI0000085&hsa-miR-27a-3p&offsets|0|-1|TTCACAGTGGCTAAGTTCCG	-		C17orf68|80169	MIMAT0000078&MI0000079&hsa-miR-23a-3p&offsets|+1|+1|TCACATTGCCAGGGATTTCCA	chr17.trna16-GlnTTG@13.31.19_2_12|Out
-	-	-		BAK1|578	MIMAT0000757&MI0000809&hsa-miR-151a-3p&offsets|-2|-1|TACTAGACTGAAGCTCCTTGAG	chr1.trna116-GluCTC@1.23.23_1_8|Out		BCL2L12|83596	MIMAT0000433&MI0000458&hsa-miR-142-5p&offsets|0|-1|CATAAAGTAGAAAGCACTAC	-		PLSCR3|57048	MIMAT0000689&MI0000746&hsa-miR-99b-5p&offsets|+1|0|ACCCGTAGAACCGACCTTGCG	chr17.trna16-GlnTTG@15.33.19_2_12|Out
-	-	-		SNRPG|6637	MIMAT0000646&MI0000681&hsa-miR-155-5p&offsets|0|-2|TTAATGCTAATCGTGATAGGG	chrMT.trnaMT-ValTAC@46.71CC.26_1_1		LRWD1|222229	MIMAT0004611&MI0000482&hsa-miR-185-3p&offsets|0|-2|AGGGGCTGGCTTTCCTCTGG	-		GSTM2|2946	MIMAT0000450&MI0000478&hsa-miR-149-5p&offsets|0|0|TCTGGCTCCGTGTCTTCACTCCC	chr15.trna7-GlnCTG@23.44.22_1_12|Out
-	-	-		ILF2|3608	MIMAT0005951&MI0006444&hsa-miR-1307-3p&offsets|+1|+1|CTCGGCGTGGCGTCGGTCGTGG	chr1.trna85-ValCAC@1.19.19_2_18|Out		ARHGAP11A|9824	MIMAT0000264&MI0000283&hsa-miR-203a&offsets|-1|0|TGTGAAATGTTTAGGACCACTAG	-		EN1|2019	MIMAT0000728&MI0000783&hsa-miR-375&offsets|-1|-3|TTTTGTTCGTTCGGCTCGCG	chr6.trna31-SerGCT@1.24.24_1_7
-	-	-		C20orf20|55257	MIMAT0001620&MI0000737&hsa-miR-200a-5p&offsets|0|-2|CATCTTACCGGACAGTGCTG	chr7.trna5-CysGCA@7.32.26_2_7|Out		ATP6V0B|533	MIMAT0000068&MI0000069&hsa-miR-15a-5p&offsets|0|+2|TAGCAGCACATAATGGTTTGTGGA	-		LRWD1|222229	MIMAT0000254&MI0000267&hsa-miR-10b-5p&offsets|-1|-1|ATACCCTGTAGAACCGAATTTGT	chrMT.trnaMT-LysTTT@58.73CCA.16_1_2
-	-	-		RFC4|5984	MIMAT0000424&MI0000447&hsa-miR-128-3p&offsets|0|0,MIMAT0000424&MI0000727&hsa-miR-128-3p&offsets|0|0|TCACAGTGAACCGGTCTCTTT	chr1.trna69-AspGTC@51.75CCA.25_1_12		LMNB1|4001	MIMAT0000259&MI0000272&hsa-miR-182-5p&offsets|+5|0|CAATGGTAGAACTCACACT	-		LOC100288778|100288778	MIMAT0000076&MI0000077&hsa-miR-21-5p&offsets|+3|+1|CTTATCAGACTGATGTTGAC	chrMT.trnaMT-ValTAC@49.71CC.23_1_1
-	-	-		SNRPD1|6632	MIMAT0000071&MI0000071&hsa-miR-17-3p&offsets|0|0|ACTGCAGTGAAGGCACTTGTAG	chr6.trna110-AlaTGC@59.75CCA.17_2_5		CENPE|1062	MIMAT0004598&MI0000457&hsa-miR-141-5p&offsets|0|-1|CATCTTCCAGTACAGTGTTGG	-		AMPD2|271	MIMAT0000244&MI0000736&hsa-miR-30c-5p&offsets|0|-1,MIMAT0000244&MI0000254&hsa-miR-30c-5p&offsets|0|-1|TGTAAACATCCTACACTCTCAG	chr15.trna7-GlnCTG@15.35.21_1_7|Out
-	-	-		CCT5|22948	MIMAT0000264&MI0000283&hsa-miR-203a&offsets|0|-1|GTGAAATGTTTAGGACCACTA	chr17.trna42-LeuTAG@1.22.22_2_9		APOA1BP|128240	MIMAT0001620&MI0000737&hsa-miR-200a-5p&offsets|0|-1|CATCTTACCGGACAGTGCTGG	-		HR|55806	MIMAT0004502&MI0000086&hsa-miR-28-3p&offsets|+2|-1|CTAGATTGTGAGCTCCTGG	chr2.trna3-AlaAGC@61.76CCA.16_1_2|Out
-	-	-		C16orf61|56942	MIMAT0004598&MI0000457&hsa-miR-141-5p&offsets|0|0|CATCTTCCAGTACAGTGTTGGA	chrMT.trnaMT-ValTAC@52.70C.19_1_1		CHAF1A|10036	MIMAT0000259&MI0000272&hsa-miR-182-5p&offsets|0|-6|TTTGGCAATGGTAGAACT	-		C8orf85|441376	MIMAT0000232&MI0000281&hsa-miR-199a-3p&offsets|+1|-1,MIMAT0000232&MI0000242&hsa-miR-199a-3p&offsets|+1|-1,MIMAT0004563&MI0000282&hsa-miR-199b-3p&offsets|+1|-1|CAGTAGTCTGCACATTGGTT	chr6.trna110-AlaTGC@1.24.24_5_13
-	-	-		UCK2|7371	MIMAT0001620&MI0000737&hsa-miR-200a-5p&offsets|0|+1|CATCTTACCGGACAGTGCTGGAT	chr1.trna54-LysTTT@1.19.19_1_6		POP7|10248	MIMAT0004692&MI0000802&hsa-miR-340-5p&offsets|0|0|TTATAAAGCAATGAGACTGATT	-		NISCH|11188	MIMAT0000772&MI0000825&hsa-miR-345-5p&offsets|0|-1|GCTGACTCCTAGTCCAGGGCT	chrMT.trnaMT-GluTTC@40.68.29_1_2
-	-	-		GAPDH|2597	MIMAT0022692&MI0000270&hsa-miR-181b-3p&offsets|0|-2|CTCACTGAACAATGAATGC	chr11.trna17-ValTAC@1.20.20_1_3|Out		MIF|4282	MIMAT0000259&MI0000272&hsa-miR-182-5p&offsets|0|-3|TTTGGCAATGGTAGAACTCAC	-		SIRT7|51547	MIMAT0000692&MI0000749&hsa-miR-30e-5p&offsets|+1|-3|GTAAACATCCTTGACTGG	chr1.trna35-GlyGCC@1.21.21_1_5|Out
-	-	-		LMNB2|84823	MIMAT0000226&MI0000279&hsa-miR-196a-5p&offsets|0|-1,MIMAT0000226&MI0000238&hsa-miR-196a-5p&offsets|0|-1|TAGGTAGTTTCATGTTGTTGG	chr17.trna16-GlnTTG@15.33.19_2_12|Out		YDJC|150223	MIMAT0000646&MI0000681&hsa-miR-155-5p&offsets|0|+2|TTAATGCTAATCGTGATAGGGGTTT	-		LOC96610|96610	MIMAT0017985&MI0015997&hsa-miR-3607-3p&offsets|0|0|ACTGTAAACGCTTTCTGATG	chr1.trna35-GlyGCC@13.34.22_1_13|Out
-	-	-		BYSL|705	MI0000077&hsa-mir-21&coords|17|+|57918617|57918633|TGTACCACCTTGTCGGG	chr15.trna7-GlnCTG@21.44.24_1_12|Out		DHCR7|1717	MIMAT0000091&MI0000091&hsa-miR-33a-5p&offsets|0|-1|GTGCATTGTAGTTGCATTGC	-		FBRSL1|57666	MIMAT0000098&MI0000102&hsa-miR-100-5p&offsets|+1|0|ACCCGTAGATCCGAACTTGTG	chr1.trna35-GlyGCC@10.31.22_4_18|Out
-	-	-		E2F3|1871	MIMAT0000257&MI0000270&hsa-miR-181b-5p&offsets|0|-2,MIMAT0000257&MI0000683&hsa-miR-181b-5p&offsets|0|-2|AACATTCATTGCTGTCGGTGG	chrMT.trnaMT-ValTAC@49.71CC.23_1_1		ATAD3A|55210	MIMAT0000076&MI0000077&hsa-miR-21-5p&offsets|0|-4|TAGCTTATCAGACTGATG	-		ABCD1|215	MIMAT0000076&MI0000077&hsa-miR-21-5p&offsets|+4|+1|TTATCAGACTGATGTTGAC	chrMT.trnaMT-TyrGTA@12.32.21_1_1|Out
-	-	-		PYCR1|5831	MIMAT0000261&MI0000273&hsa-miR-183-5p&offsets|+1|-2|ATGGCACTGGTAGAATTCA	chr1.trna35-GlyGCC@10.30.21_4_18|Out		LPAR2|9170	MIMAT0004784&MI0003513&hsa-miR-455-3p&offsets|0|+1|GCAGTCCATGGGCATATACACT	-		RRP1|8568	MIMAT0000689&MI0000746&hsa-miR-99b-5p&offsets|0|-4|CACCCGTAGAACCGACCT	chr7.trna5-CysGCA@13.30.18_2_8|Out
-	-	-		ADAM19|8728	MIMAT0000096&MI0000100&hsa-miR-98-5p&offsets|0|0|TGAGGTAGTAAGTTGTATTGTT	chrMT.trnaMT-ValTAC@40.68.29_1_1|Out		PFN1|5216	MIMAT0003393&MI0001448&hsa-miR-425-5p&offsets|0|+1|AATGACACGATCACTCCCGTTGAG	-		PIM3|415116	MIMAT0000232&MI0000281&hsa-miR-199a-3p&offsets|+3|0,MIMAT0000232&MI0000242&hsa-miR-199a-3p&offsets|+3|0,MIMAT0004563&MI0000282&hsa-miR-199b-3p&offsets|+3|0|GTAGTCTGCACATTGGTTA	chr15.trna7-GlnCTG@19.40.22_1_7
-	-	-		MRPL13|28998	MIMAT0000226&MI0000279&hsa-miR-196a-5p&offsets|0|-2,MIMAT0000226&MI0000238&hsa-miR-196a-5p&offsets|0|-2|TAGGTAGTTTCATGTTGTTG	chrMT.trnaMT-GluTTC@39.62.24_1_2		NACC1|112939	MIMAT0000068&MI0000069&hsa-miR-15a-5p&offsets|0|0|TAGCAGCACATAATGGTTTGTG	-		SENP3|26168	MIMAT0004494&MI0000077&hsa-miR-21-3p&offsets|0|-4|CAACACCAGTCGATGGG	chr6.trna83-LeuTAA@1.25.25_1_1
-	-	-		TPI1|7167	MIMAT0000259&MI0000272&hsa-miR-182-5p&offsets|+1|0|TTGGCAATGGTAGAACTCACACT	chrMT.trnaMT-ValTAC@49.70C.22_1_1		VPS72|6944	MIMAT0000264&MI0000283&hsa-miR-203a&offsets|+1|0|TGAAATGTTTAGGACCACTAG	-		ZNF335|63925	MIMAT0000062&MI0000062&hsa-let-7a-5p&offsets|-1|0|GTGAGGTAGTAGGTTGTATAGTT	chr1.trna111-HisGTG@15.31.17_1_10|Out
-	-	-		HPRT1|3251	MIMAT0000264&MI0000283&hsa-miR-203a&offsets|0|-2|GTGAAATGTTTAGGACCACT	chr16.trna27-LeuTAG@1.26.26_1_1		GLT25D1|79709	MIMAT0002888&MI0003205&hsa-miR-532-5p&offsets|0|-1|CATGCCTTGAGTGTAGGACCG	-		TNFRSF14|8764	MIMAT0005920&MI0006403&hsa-miR-1266-5p&offsets|0|0|CCTCAGGGCTGTAGAACAGGGCT	chr15.trna7-GlnCTG@11.34.24_1_7|Out
-	-	-		EPR1|8475	MIMAT0005951&MI0006444&hsa-miR-1307-3p&offsets|+1|+2|CTCGGCGTGGCGTCGGTCGTGGT	chrMT.trnaMT-ProTGG@49.71CCA.23_1_1		SNRPC|6631	MIMAT0004697&MI0000809&hsa-miR-151a-5p&offsets|0|+2|TCGAGGAGCTCACAGTCTAGTAT	-		NR2C2AP|126382	MIMAT0000689&MI0000746&hsa-miR-99b-5p&offsets|0|-3|CACCCGTAGAACCGACCTT	chr1.trna111-HisGTG@16.34.19_1_9
-	-	-		SQLE|6713	MIMAT0000264&MI0000283&hsa-miR-203a&offsets|0|0|GTGAAATGTTTAGGACCACTAG	chr17.trna16-GlnTTG@12.30.19_2_13|Out		DNAJB11|51726	MIMAT0000076&MI0000077&hsa-miR-21-5p&offsets|0|-3|TAGCTTATCAGACTGATGT	-		CTDP1|9150	MIMAT0000261&MI0000273&hsa-miR-183-5p&offsets|+1|-2|ATGGCACTGGTAGAATTCA	chrMT.trnaMT-ProTGG@55.71CCA.17_1_1|Out
-	-	-		SCNM1|79005	MIMAT0000065&MI0000065&hsa-let-7d-5p&offsets|0|0|AGAGGTAGTAGGTTGCATAGTT	chr1.trna111-HisGTG@15.31.17_1_10|Out		SCNM1|79005	MIMAT0000692&MI0000749&hsa-miR-30e-5p&offsets|+1|+4|GTAAACATCCTTGACTGGAAGCTGT	-		CNTROB|116840	MIMAT0000253&MI0000266&hsa-miR-10a-5p&offsets|+2|-2|CCCTGTAGATCCGAATTTG	chr1.trna111-HisGTG@15.33.19_1_9
-	-	-		GARS|2617	MIMAT0000617&MI0000650&hsa-miR-200c-3p&offsets|+3|0|TACTGCCGGGTAATGATGGA	chr17.trna16-GlnTTG@15.32.18_2_12|Out		MCM2|4171	MIMAT0000262&MI0000274&hsa-miR-187-3p&offsets|0|0|TCGTGTCTTGTGTTGCAGCCGG	-		ANKRD13D|338692	MIMAT0000076&MI0000077&hsa-miR-21-5p&offsets|+3|+2|CTTATCAGACTGATGTTGACT	chr17.trna16-GlnTTG@11.33.23_2_12|Out
-	-	-		MRPL47|57129	MIMAT0004926&MI0005543&hsa-miR-708-5p&offsets|0|-2|AAGGAGCTTACAATCTAGCTG	chr1.trna35-GlyGCC@13.30.18_4_19|Out		SMG5|23381	MIMAT0018101&MI0016078&hsa-miR-3677-3p&offsets|0|-1|CTCGTGGGCTCTGGCCACGGC	-		ERCC3|2071	MIMAT0000259&MI0000272&hsa-miR-182-5p&offsets|+5|0|CAATGGTAGAACTCACACT	chr1.trna35-GlyGCC@12.30.19_4_18|Out
-	-	-		UBQLN4|56893	MIMAT0004509&MI0000095&hsa-miR-93-3p&offsets|0|0|ACTGCTGAGCTAGCACTTCCCG	chr16.trna34-GlyCCC@1.29.29_1_2		YIF1B|90522	MIMAT0000692&MI0000749&hsa-miR-30e-5p&offsets|+1|+3|GTAAACATCCTTGACTGGAAGCTG	-		KLF16|83855	MIMAT0000765&MI0000816&hsa-miR-335-5p&offsets|0|-2|TCAAGAGCAATAACGAAAAAT	chr1.trna111-HisGTG@16.32.17_1_9
-	-	-		TOMM40|10452	MIMAT0004559&MI0000271&hsa-miR-181c-3p&offsets|+1|0|ACCATCGACCGTTGAGTGGAC	chr13.trna3-GluTTC@1.30.30_1_2		CCNF|899	MIMAT0000070&MI0000071&hsa-miR-17-5p&offsets|0|-3|CAAAGTGCTTACAGTGCAGG	-		PUS1|80324	MIMAT0026472&MI0000064&hsa-let-7c-3p&offsets|0|-1|CTGTACAACCTTCTAGCTTTC	chr6.trna10-AlaCGC@60.75CCA.16_2_7|Out
-	-	-		RFC2|5982	MIMAT0000076&MI0000077&hsa-miR-21-5p&offsets|+2|-1|GCTTATCAGACTGATGTTG	chrMT.trnaMT-ValTAC@51.70C.20_1_1		DPP3|10072	MIMAT0000757&MI0000809&hsa-miR-151a-3p&offsets|-1|-1|ACTAGACTGAAGCTCCTTGAG	-		GOLGA8A|23015	MIMAT0000693&MI0000749&hsa-miR-30e-3p&offsets|+1|-1|TTTCAGTCGGATGTTTACAG	chr1.trna68-GlyGCC@1.18.18_2_10|Out
-	-	-		CXCL10|3627	MIMAT0000417&MI0000438&hsa-miR-15b-5p&offsets|0|-1|TAGCAGCACATCATGGTTTAC	chr1.trna69-AspGTC@51.71.21_1_12		COL10A1|1300	MIMAT0000090&MI0000090&hsa-miR-32-5p&offsets|0|-1|TATTGCACATTACTAAGTTGC	-		C1orf38|9473	MIMAT0000101&MI0000108&hsa-miR-103a-3p&offsets|+4|-1,MIMAT0000101&MI0000109&hsa-miR-103a-3p&offsets|+4|-1|GCATTGTACAGGGCTATG	chrMT.trnaMT-ValTAC@52.71CC.20_1_1
-	-	-		POP1|10940	MIMAT0004481&MI0000062&hsa-let-7a-3p&offsets|0|-1,MIMAT0004481&MI0000060&hsa-let-7a-3p&offsets|0|-1|CTATACAATCTACTGTCTTT	chr15.trna7-GlnCTG@10.34.25_1_7|Out		SNRPB|6628	MIMAT0000318&MI0000342&hsa-miR-200b-3p&offsets|0|0|TAATACTGCCTGGTAATGATGA	-		CDC25B|994	MIMAT0000693&MI0000749&hsa-miR-30e-3p&offsets|0|-5,MIMAT0000088&MI0000088&hsa-miR-30a-3p&offsets|0|-5|CTTTCAGTCGGATGTTT	chrMT.trnaMT-ValTAC@54.70C.17_1_1
-	-	-		LRRC59|55379	MIMAT0000069&MI0000070&hsa-miR-16-5p&offsets|0|+1,MIMAT0000069&MI0000115&hsa-miR-16-5p&offsets|0|+1|TAGCAGCACGTAAATATTGGCGT	chr1.trna117-GlyTCC@1.23.23_1_7|Out		ACOT7|11332	MIMAT0000259&MI0000272&hsa-miR-182-5p&offsets|0|-2|TTTGGCAATGGTAGAACTCACA	-		GCDH|2639	MIMAT0000067&MI0000067&hsa-let-7f-5p&offsets|+3|0,MIMAT0000067&MI0000068&hsa-let-7f-5p&offsets|+3|0|GGTAGTAGATTGTATAGTT	chrMT.trnaMT-GluTTC@39.58.20_1_2
-	-	-		PDIA6|10130	MIMAT0004784&MI0003513&hsa-miR-455-3p&offsets|0|+1|GCAGTCCATGGGCATATACACT	chr17.trna16-GlnTTG@11.33.23_2_12|Out		CENPN|55839	MI0000077&hsa-mir-21&coords|17|+|57918617|57918633|TGTACCACCTTGTCGGG	-		AKAP8|10270	MIMAT0000088&MI0000088&hsa-miR-30a-3p&offsets|+1|-3|TTTCAGTCGGATGTTTGC	chrMT.trnaMT-GluTTC@40.58.19_1_2
-	-	-		CKAP2|26586	MIMAT0003886&MI0003834&hsa-miR-769-5p&offsets|-1|-1|CTGAGACCTCTGGGTTCTGAGC	chr6.trna110-AlaTGC@58.75CCA.18_2_5		NME1|4830	MIMAT0003298&MI0003643&hsa-miR-629-3p&offsets|0|-1|GTTCTCCCAACGTAAGCCCAG	-		IFRD2|7866	MIMAT0000062&MI0000061&hsa-let-7a-5p&offsets|+3|-1,MIMAT0000062&MI0000062&hsa-let-7a-5p&offsets|+3|-1,MIMAT0000062&MI0000060&hsa-let-7a-5p&offsets|+3|-1|GGTAGTAGGTTGTATAGT	chr1.trna34-LeuCAG@1.26.26_1_9|Out
-	-	-		SNRPC|6631	MIMAT0000257&MI0000270&hsa-miR-181b-5p&offsets|+1|-2,MIMAT0000257&MI0000683&hsa-miR-181b-5p&offsets|+1|-2|ACATTCATTGCTGTCGGTGG	chr14.trna13-LysCTT@1.25.25_1_9		S100A11|6282	MIMAT0000076&MI0000077&hsa-miR-21-5p&offsets|+1|0|AGCTTATCAGACTGATGTTGA	-		SPSB3|90864	MIMAT0004776&MI0003190&hsa-miR-505-5p&offsets|0|0|GGGAGCCAGGAAGTATTGATGT	chrMT.trnaMT-PheGAA@59.74CCA.16_1_1|Out
-	-	-		TIMM17A|10440	MIMAT0000441&MI0000466&hsa-miR-9-5p&offsets|0|-1,MIMAT0000441&MI0000468&hsa-miR-9-5p&offsets|0|-1,MIMAT0000441&MI0000467&hsa-miR-9-5p&offsets|0|-1|TCTTTGGTTATCTAGCTGTATG	chr17.trna16-GlnTTG@59.75CCA.17_1_5|Out		DONSON|29980	MIMAT0000257&MI0000270&hsa-miR-181b-5p&offsets|0|0,MIMAT0000257&MI0000683&hsa-miR-181b-5p&offsets|0|0|AACATTCATTGCTGTCGGTGGGT	-		SCAMP3|10067	MIMAT0000232&MI0000281&hsa-miR-199a-3p&offsets|+1|0,MIMAT0000232&MI0000242&hsa-miR-199a-3p&offsets|+1|0,MIMAT0004563&MI0000282&hsa-miR-199b-3p&offsets|+1|0|CAGTAGTCTGCACATTGGTTA	chr1.trna85-ValCAC@1.22.22_2_17|Out
-	-	-		ARF1|375	MIMAT0001620&MI0000737&hsa-miR-200a-5p&offsets|0|0|CATCTTACCGGACAGTGCTGGA	chr17.trna42-LeuTAG@69.85CCA.17_2_11		REEP4|80346	MIMAT0000076&MI0000077&hsa-miR-21-5p&offsets|+3|+1|CTTATCAGACTGATGTTGAC	-		TSPO|706	MIMAT0000243&MI0000253&hsa-miR-148a-3p&offsets|0|-4|TCAGTGCACTACAGAACT	chrMT.trnaMT-ValTAC@42.69.28_1_1|Out
-	-	-		LSM4|25804	MIMAT0000075&MI0000076&hsa-miR-20a-5p&offsets|0|+1|TAAAGTGCTTATAGTGCAGGTAGT	chrMT.trnaMT-LysTTT@1.21.21_1_2		MRPS12|6183	MIMAT0004559&MI0000271&hsa-miR-181c-3p&offsets|+1|0|ACCATCGACCGTTGAGTGGAC	-		SF4|57794	MIMAT0003163&MI0003514&hsa-miR-539-5p&offsets|0|+1|GGAGAAATTATCCTTGGTGTGTT	chr17.trna16-GlnTTG@14.31.18_2_12|Out
-	-	-		GMPS|8833	MIMAT0000073&MI0000073&hsa-miR-19a-3p&offsets|0|-1|TGTGCAAATCTATGCAAAACTG	chrMT.trnaMT-ValTAC@49.69.21_1_1|Out		SLC39A7|7922	MIMAT0000692&MI0000749&hsa-miR-30e-5p&offsets|0|0|TGTAAACATCCTTGACTGGAAG	-		SELO|83642	MIMAT0000078&MI0000079&hsa-miR-23a-3p&offsets|+1|+2|TCACATTGCCAGGGATTTCCAA	chrMT.trnaMT-ValTAC@52.70C.19_1_1
-	-	-		TTYH3|80727	MIMAT0001620&MI0000737&hsa-miR-200a-5p&offsets|0|-1|CATCTTACCGGACAGTGCTGG	chrMT.trnaMT-GluTTC@40.59.20_1_2		FBXL6|26233	MIMAT0004678&MI0000746&hsa-miR-99b-3p&offsets|0|-3|CAAGCTCGTGTCTGTGGGT	-		IKBKE|9641	MIMAT0000418&MI0000439&hsa-miR-23b-3p&offsets|+1|+3|TCACATTGCCAGGGATTACCACG	chr17.trna16-GlnTTG@11.30.20_2_13|Out
-	-	-		HSPE1|3336	MIMAT0004657&MI0000650&hsa-miR-200c-5p&offsets|0|0|CGTCTTACCCAGCAGTGTTTGG	chrMT.trnaMT-ValTAC@53.71CC.19_1_1		RANGAP1|5905	MIMAT0004657&MI0000650&hsa-miR-200c-5p&offsets|0|0|CGTCTTACCCAGCAGTGTTTGG	-		ERF|2077	MIMAT0000693&MI0000749&hsa-miR-30e-3p&offsets|0|-1|CTTTCAGTCGGATGTTTACAG	chrMT.trnaMT-ValTAC@41.70C.30_1_1
-	-	-		TBC1D7|51256	MIMAT0002874&MI0003188&hsa-miR-503-5p&offsets|0|0|TAGCAGCGGGAACAGTTCTGCAG	chr1.trna85-ValCAC@1.25.25_2_16|Out		TYMS|7298	MIMAT0000757&MI0000809&hsa-miR-151a-3p&offsets|-2|-2|TACTAGACTGAAGCTCCTTGA	-		RUSC1|23623	MIMAT0000077&MI0000078&hsa-miR-22-3p&offsets|0|-6|AAGCTGCCAGTTGAAG	chr1.trna85-ValCAC@1.18.18_2_18|Out
-	-	-		C20orf24|55969	MIMAT0002174&MI0002468&hsa-miR-484&offsets|0|0|TCAGGCTCAGTCCCCTCCCGAT	chr17.trna41-SerCGA@1.25.25_1_2		PCNA|5111	MIMAT0000261&MI0000273&hsa-miR-183-5p&offsets|+1|-3|ATGGCACTGGTAGAATTC	-		NPEPL1|79716	MIMAT0000226&MI0000279&hsa-miR-196a-5p&offsets|0|-2,MIMAT0000226&MI0000238&hsa-miR-196a-5p&offsets|0|-2|TAGGTAGTTTCATGTTGTTG	chrMT.trnaMT-ValTAC@50.70C.21_1_1
-	-	-		PITX1|5307	MIMAT0000772&MI0000825&hsa-miR-345-5p&offsets|0|0|GCTGACTCCTAGTCCAGGGCTC	chr13.trna5-GluTTC@1.30.30_1_2		SNRPA1|6627	MIMAT0000682&MI0000737&hsa-miR-200a-3p&offsets|0|0|TAACACTGTCTGGTAACGATGT	-		TGFB1|7040	MIMAT0000232&MI0000281&hsa-miR-199a-3p&offsets|+1|-3,MIMAT0000232&MI0000242&hsa-miR-199a-3p&offsets|+1|-3,MIMAT0004563&MI0000282&hsa-miR-199b-3p&offsets|+1|-3|CAGTAGTCTGCACATTGG	chr1.trna111-HisGTG@15.35.21_1_9
-	-	-		RHBDF2|79651	MIMAT0000074&MI0000074&hsa-miR-19b-3p&offsets|0|0,MIMAT0000074&MI0000075&hsa-miR-19b-3p&offsets|0|0|TGTGCAAATCCATGCAAAACTGA	chr1.trna69-AspGTC@51.73C.23_1_12		SLC12A8|84561	MIMAT0000646&MI0000681&hsa-miR-155-5p&offsets|0|0|TTAATGCTAATCGTGATAGGGGT	-		C20orf27|54976	MIMAT0004703&MI0000816&hsa-miR-335-3p&offsets|-1|0|GTTTTTCATTATTGCTCCTGACC	chrMT.trnaMT-GluTTC@50.72CCA.23_1_2
-	-	-		ACTL6A|86	MIMAT0000433&MI0000458&hsa-miR-142-5p&offsets|0|-2|CATAAAGTAGAAAGCACTA	chr1.trna34-LeuCAG@69.86CCA.18_1_7|Out		MLF1IP|79682	MIMAT0000270&MI0000289&hsa-miR-181a-3p&offsets|0|-1|ACCATCGACCGTTGATTGTAC	-		NRBP2|340371	MIMAT0000437&MI0000461&hsa-miR-145-5p&offsets|+1|-1|TCCAGTTTTCCCAGGAATCCC	chrMT.trnaMT-ValTAC@46.72CCA.27_1_1
-	-	-		TSTA3|7264	MIMAT0000243&MI0000253&hsa-miR-148a-3p&offsets|0|+1|TCAGTGCACTACAGAACTTTGTC	chr1.trna54-LysTTT@14.32.19_1_8		PSMD4|5710	MIMAT0003393&MI0001448&hsa-miR-425-5p&offsets|0|+2|AATGACACGATCACTCCCGTTGAGT	-		CCDC9|26093	MIMAT0000689&MI0000746&hsa-miR-99b-5p&offsets|0|-1|CACCCGTAGAACCGACCTTGC	chrMT.trnaMT-ValTAC@57.72CCA.16_1_1
-	-	-		PARP1|142	MIMAT0000433&MI0000458&hsa-miR-142-5p&offsets|0|-1|CATAAAGTAGAAAGCACTAC	chrMT.trnaMT-ProTGG@55.71CCA.17_1_1|Out		PRDX4|10549	MIMAT0002871&MI0003184&hsa-miR-500a-3p&offsets|0|+1|ATGCACCTGGGCAAGGATTCTGA	-		TCIRG1|10312	MIMAT0026738&MI0006349&hsa-miR-1287-3p&offsets|0|-1|CTCTAGCCACAGATGCAGTGA	chr13.trna3-GluTTC@1.28.28_1_2
-	-	-		YARS|8565	MIMAT0000417&MI0000438&hsa-miR-15b-5p&offsets|0|0|TAGCAGCACATCATGGTTTACA	chrMT.trnaMT-ValTAC@52.71CC.20_1_1		IMPDH1|3614	MIMAT0004571&MI0000342&hsa-miR-200b-5p&offsets|0|0|CATCTTACTGGGCAGCATTGGA	-		IMPA2|3613	MIMAT0000254&MI0000267&hsa-miR-10b-5p&offsets|0|-6|TACCCTGTAGAACCGAA	chr17.trna16-GlnTTG@10.33.24_2_12|Out
-	-	-		RANBP1|5902	MIMAT0000070&MI0000071&hsa-miR-17-5p&offsets|+3|0,MIMAT0000103&MI0000113&hsa-miR-106a-5p&offsets|+3|0|AGTGCTTACAGTGCAGGTAG	chr6.trna110-AlaTGC@60.75CCA.16_2_5|Out		ALG3|10195	MIMAT0000424&MI0000447&hsa-miR-128-3p&offsets|0|-2,MIMAT0000424&MI0000727&hsa-miR-128-3p&offsets|0|-2|TCACAGTGAACCGGTCTCT	-		GGA3|23163	MIMAT0000693&MI0000749&hsa-miR-30e-3p&offsets|0|-6,MIMAT0000088&MI0000088&hsa-miR-30a-3p&offsets|0|-6|CTTTCAGTCGGATGTT	chr1.trna35-GlyGCC@10.30.21_4_18|Out
-	-	-		C8orf30A|51236	MIMAT0000070&MI0000071&hsa-miR-17-5p&offsets|0|-2|CAAAGTGCTTACAGTGCAGGT	chr15.trna7-GlnCTG@32.52.21_1_11		DUSP23|54935	MIMAT0000065&MI0000065&hsa-let-7d-5p&offsets|0|+1|AGAGGTAGTAGGTTGCATAGTTT	-		RRS1|23212	MIMAT0002174&MI0002468&hsa-miR-484&offsets|0|-2|TCAGGCTCAGTCCCCTCCCG	chr6.trna51-SerTGA@1.24.24_2_12
-	-	-		XPO5|57510	MIMAT0000692&MI0000749&hsa-miR-30e-5p&offsets|0|+1|TGTAAACATCCTTGACTGGAAGC	chr6.trna51-SerTGA@1.25.25_2_11		RTKN|6242	MIMAT0003338&MI0003684&hsa-miR-660-5p&offsets|0|0|TACCCATTGCATATCGGAGTTG	-		FES|2242	MIMAT0000432&MI0000457&hsa-miR-141-3p&offsets|0|-4|TAACACTGTCTGGTAAAG	chrMT.trnaMT-GluTTC@42.62.21_1_2
-	-	-		PDIA4|9601	MIMAT0004598&MI0000457&hsa-miR-141-5p&offsets|0|-2|CATCTTCCAGTACAGTGTTG	chr6.trna110-AlaTGC@1.24.24_5_13		RUSC1|23623	MIMAT0004494&MI0000077&hsa-miR-21-3p&offsets|0|-5|CAACACCAGTCGATGG	-		CSNK1G2|1455	MIMAT0000415&MI0000434&hsa-let-7i-5p&offsets|0|0|TGAGGTAGTAGTTTGTGCTGTT	chrMT.trnaMT-ProTGG@49.70CC.22_1_1
-	-	-		SLC16A3|9123	MIMAT0000080&MI0000081&hsa-miR-24-3p&offsets|-1|-1,MIMAT0000080&MI0000080&hsa-miR-24-3p&offsets|-1|-1|CTGGCTCAGTTCAGCAGGAACA	chr17.trna42-LeuTAG@1.25.25_2_9		GINS4|84296	MIMAT0000261&MI0000273&hsa-miR-183-5p&offsets|0|-3|TATGGCACTGGTAGAATTC	-		CLPP|8192	MIMAT0000244&MI0000736&hsa-miR-30c-5p&offsets|0|-5,MIMAT0000244&MI0000254&hsa-miR-30c-5p&offsets|0|-5,MIMAT0000420&MI0000441&hsa-miR-30b-5p&offsets|0|-4|TGTAAACATCCTACACTC	chr15.trna7-GlnCTG@17.34.18_1_7|Out
-	-	-		MEMO1|51072	MIMAT0000078&MI0000079&hsa-miR-23a-3p&offsets|0|-2|ATCACATTGCCAGGGATTT	chr13.trna3-GluTTC@1.28.28_1_2		CKS1B|1163	MIMAT0004678&MI0000746&hsa-miR-99b-3p&offsets|0|-2|CAAGCTCGTGTCTGTGGGTC	-		GTF3C5|9328	MIMAT0000437&MI0000461&hsa-miR-145-5p&offsets|+1|0|TCCAGTTTTCCCAGGAATCCCT	chr14.trna18-TyrGTA@1.25.25_1_8|Out
-	-	-		CBS|875	MIMAT0000084&MI0000085&hsa-miR-27a-3p&offsets|0|-1|TTCACAGTGGCTAAGTTCCG	chr1.trna111-HisGTG@13.30.18_1_10|Out		C11orf83|790955	MIMAT0000222&MI0000234&hsa-miR-192-5p&offsets|0|+1|CTGACCTATGAATTGACAGCCA	-		OPLAH|26873	MIMAT0004502&MI0000086&hsa-miR-28-3p&offsets|0|-1|CACTAGATTGTGAGCTCCTGG	chr1.trna111-HisGTG@15.32.18_1_9
-	-	-		THOC4|10189	MIMAT0000075&MI0000076&hsa-miR-20a-5p&offsets|0|0|TAAAGTGCTTATAGTGCAGGTAG	chr5.trna15-ValAAC@1.23.23_1_1		UQCRHL|440567	MIMAT0002871&MI0003184&hsa-miR-500a-3p&offsets|0|0|ATGCACCTGGGCAAGGATTCTG	-		TNNT3|7140	MIMAT0000440&MI0000465&hsa-miR-191-5p&offsets|0|-5|CAACGGAATCCCAAAAGC	chrMT.trnaMT-TyrGTA@13.31.19_1_1|Out
-	-	-		PSMB4|5692	MIMAT0000424&MI0000447&hsa-miR-128-3p&offsets|0|-1,MIMAT0000424&MI0000727&hsa-miR-128-3p&offsets|0|-1|TCACAGTGAACCGGTCTCTT	chr6.trna31-SerGCT@1.24.24_1_7		JTB|10899	MIMAT0000688&MI0000745&hsa-miR-301a-3p&offsets|0|0|CAGTGCAATAGTATTGTCAAAGC	-		PKD1|5310	MIMAT0000098&MI0000102&hsa-miR-100-5p&offsets|+1|-1|ACCCGTAGATCCGAACTTGT	chrMT.trnaMT-ValTAC@45.71CC.27_1_1
-	-	-		CKS1B|1163	MIMAT0000076&MI0000077&hsa-miR-21-5p&offsets|+1|-1|AGCTTATCAGACTGATGTTG	chrMT.trnaMT-AlaTGC@52.72CCA.21_1_3		TMEM132A|54972	MIMAT0000750&MI0000802&hsa-miR-340-3p&offsets|0|+1|TCCGTCTCAGTTACTTTATAGCC	-		OGFR|11054	MIMAT0000710&MI0000767&hsa-miR-365a-3p&offsets|0|+1,MIMAT0022834&MI0000769&hsa-miR-365b-3p&offsets|0|+1|TAATGCCCCTAAAAATCCTTATT	chr1.trna111-HisGTG@4.28.25_1_9|Out
-	-	-		ECT2|1894	MIMAT0000646&MI0000681&hsa-miR-155-5p&offsets|0|-3|TTAATGCTAATCGTGATAGG	chr11.trna15-PheGAA@60.76CCA.17_1_9|Out		LAGE3|8270	MIMAT0000093&MI0000095&hsa-miR-93-5p&offsets|+2|0|AAGTGCTGTTCGTGCAGGTAG	-		PFKL|5211	MIMAT0000099&MI0000103&hsa-miR-101-3p&offsets|-1|-2,MIMAT0000099&MI0000739&hsa-miR-101-3p&offsets|-1|-2|GTACAGTACTGTGATAACTG	chrMT.trnaMT-ValTAC@39.68.30_1_1|Out
-	-	-		LPCAT1|79888	MIMAT0002888&MI0003205&hsa-miR-532-5p&offsets|0|-1|CATGCCTTGAGTGTAGGACCG	chr15.trna7-GlnCTG@59.75CCA.17_1_11		TIMM44|10469	MIMAT0000222&MI0000234&hsa-miR-192-5p&offsets|0|0|CTGACCTATGAATTGACAGCC	-		PIK3CD|5293	MIMAT0000447&MI0000474&hsa-miR-134-5p&offsets|0|-2|TGTGACTGGTTGACCAGAGG	chr1.trna68-GlyGCC@1.19.19_2_10|Out
-	-	-		ENY2|56943	MIMAT0000093&MI0000095&hsa-miR-93-5p&offsets|+2|0|AAGTGCTGTTCGTGCAGGTAG	chr1.trna35-GlyGCC@9.30.22_4_18|Out		FARSA|2193	MIMAT0000076&MI0000077&hsa-miR-21-5p&offsets|0|+4|TAGCTTATCAGACTGATGTTGACTGT	-		GIGYF1|64599	MIMAT0004774&MI0003185&hsa-miR-501-3p&offsets|+1|+1|ATGCACCCGGGCAAGGATTCTG	chr1.trna111-HisGTG@8.31.24_1_10
-	-	-		CABLES2|81928	MIMAT0002809&MI0003129&hsa-miR-146b-5p&offsets|0|+2|TGAGAACTGAATTCCATAGGCTGT	chr17.trna16-GlnTTG@13.30.18_2_13|Out		RANBP1|5902	MIMAT0000280&MI0000300&hsa-miR-223-3p&offsets|0|-3|TGTCAGTTTGTCAAATACC	-		FBXW5|54461	MIMAT0000227&MI0000239&hsa-miR-197-3p&offsets|+1|0|TCACCACCTTCTCCACCCAGC	chr1.trna35-GlyGCC@1.22.22_1_5|Out
-	-	-		CDC25B|994	MIMAT0002876&MI0003190&hsa-miR-505-3p&offsets|0|-1|CGTCAACACTTGCTGGTTTCC	chr6.trna80-IleAAT@1.20.20_3_15|Out		PRCC|5546	MIMAT0000646&MI0000681&hsa-miR-155-5p&offsets|0|-3|TTAATGCTAATCGTGATAGG	-		XAB2|56949	MIMAT0000231&MI0000281&hsa-miR-199a-5p&offsets|+1|-1,MIMAT0000231&MI0000242&hsa-miR-199a-5p&offsets|+1|-1|CCAGTGTTCAGACTACCTGTT	chrMT.trnaMT-ValTAC@54.71CC.18_1_1
-	-	-		FBXL6|26233	MIMAT0003393&MI0001448&hsa-miR-425-5p&offsets|0|0|AATGACACGATCACTCCCGTTGA	chr17.trna23-ArgCCG@1.24.24_1_1		MCM5|4174	MIMAT0004927&MI0005543&hsa-miR-708-3p&offsets|+1|+1|AACTAGACTGTGAGCTTCTAGA	-		CALML5|51806	MIMAT0003283&MI0003628&hsa-miR-615-3p&offsets|0|-1|TCCGAGCCTGGGTCTCCCTCT	chr6.trna10-AlaCGC@59.75CCA.17_2_7
-	-	-		CHAF1B|8208	MIMAT0000261&MI0000273&hsa-miR-183-5p&offsets|0|-3|TATGGCACTGGTAGAATTC	chr6.trna10-AlaCGC@1.19.19_3_8		PPAN|56342	MIMAT0000617&MI0000650&hsa-miR-200c-3p&offsets|0|-1|TAATACTGCCGGGTAATGATGG	-		FAM160B2|64760	MIMAT0004604&MI0000472&hsa-miR-127-5p&offsets|0|-1|CTGAAGCTCAGAGGGCTCTGA	chr1.trna111-HisGTG@8.30.23_1_10|Out
-	-	-		FAM136A|84908	MIMAT0004797&MI0003589&hsa-miR-582-3p&offsets|0|-2|TAACTGGTTGAACAACTGAA	chrMT.trnaMT-GluTTC@50.72CCA.23_1_2		SF3B4|10262	MIMAT0000646&MI0000681&hsa-miR-155-5p&offsets|0|-1|TTAATGCTAATCGTGATAGGGG	-		MAN2C1|4123	MIMAT0001631&MI0001729&hsa-miR-451a&offsets|+1|-1|AACCGTTACCATTACTGAGT	chr15.trna7-GlnCTG@14.34.21_1_7|Out
-	-	-		GPSM2|29899	MIMAT0000222&MI0000234&hsa-miR-192-5p&offsets|0|-2|CTGACCTATGAATTGACAG	chr17.trna16-GlnTTG@9.33.25_2_12|Out		CTHRC1|115908	MIMAT0000261&MI0000273&hsa-miR-183-5p&offsets|+1|-2|ATGGCACTGGTAGAATTCA	-		KLF2|10365	MIMAT0004502&MI0000086&hsa-miR-28-3p&offsets|+1|-1|ACTAGATTGTGAGCTCCTGG	chrMT.trnaMT-ValTAC@49.69.21_1_1|Out
-	-	-		TEAD4|7004	MIMAT0004692&MI0000802&hsa-miR-340-5p&offsets|0|0|TTATAAAGCAATGAGACTGATT	chrMT.trnaMT-ValTAC@45.72CCA.28_1_1		EXOSC4|54512	MIMAT0004491&MI0000074&hsa-miR-19b-1-5p&offsets|0|-1|AGTTTTGCAGGTTTGCATCCAG	-		PUF60|22827	MIMAT0000254&MI0000267&hsa-miR-10b-5p&offsets|+4|0|CTGTAGAACCGAATTTGTG	chr15.trna4-ArgTCG@1.19.19_2_4
-	-	-		NFE2L3|9603	MIMAT0000270&MI0000289&hsa-miR-181a-3p&offsets|0|-2|ACCATCGACCGTTGATTGTA	chrMT.trnaMT-ValTAC@51.71CC.21_1_1		ZNF598|90850	MIMAT0000257&MI0000270&hsa-miR-181b-5p&offsets|0|-1,MIMAT0000257&MI0000683&hsa-miR-181b-5p&offsets|0|-1|AACATTCATTGCTGTCGGTGGG	-		GMIP|51291	MIMAT0000261&MI0000273&hsa-miR-183-5p&offsets|+1|-1|ATGGCACTGGTAGAATTCAC	chrMT.trnaMT-ValTAC@46.71CC.26_1_1
-	-	-		PNP|4860	MIMAT0004518&MI0000115&hsa-miR-16-2-3p&offsets|-1|-1|ACCAATATTACTGTGCTGCTTT	chr6.trna51-SerTGA@68.85CCA.18_2_11		DTYMK|1841	MIMAT0003150&MI0003513&hsa-miR-455-5p&offsets|0|0|TATGTGCCTTTGGACTACATCG	-		CD83|9308	MIMAT0001341&MI0001446&hsa-miR-424-5p&offsets|0|-1|CAGCAGCAATTCATGTTTTGA	chrMT.trnaMT-ProTGG@51.71CCA.21_1_1
-	-	-		PRCC|5546	MIMAT0004584&MI0000433&hsa-let-7g-3p&offsets|0|0|CTGTACAGGCCACTGCCTTGC	chr15.trna7-GlnCTG@13.34.22_1_7|Out		GBAP1|2630	MIMAT0004509&MI0000095&hsa-miR-93-3p&offsets|0|0|ACTGCTGAGCTAGCACTTCCCG	-		ZBTB22|9278	MIMAT0000692&MI0000749&hsa-miR-30e-5p&offsets|+1|+1|GTAAACATCCTTGACTGGAAGC	chr15.trna7-GlnCTG@21.44.24_1_12|Out
-	-	-		B4GALT3|8703	MIMAT0000692&MI0000749&hsa-miR-30e-5p&offsets|0|+2|TGTAAACATCCTTGACTGGAAGCT	chr1.trna117-GlyTCC@1.26.26_1_7|Out		PFDN6|10471	MIMAT0000076&MI0000077&hsa-miR-21-5p&offsets|+5|+2|TATCAGACTGATGTTGACT	-		STX10|8677	MIMAT0000259&MI0000272&hsa-miR-182-5p&offsets|0|-5|TTTGGCAATGGTAGAACTC	chrMT.trnaMT-ValTAC@44.72CCA.29_1_1
-	-	-		C1orf31|388753	MIMAT0000068&MI0000069&hsa-miR-15a-5p&offsets|0|0|TAGCAGCACATAATGGTTTGTG	chrMT.trnaMT-ValTAC@53.70C.18_1_1		B4GALT2|8704	MIMAT0004926&MI0005543&hsa-miR-708-5p&offsets|0|0|AAGGAGCTTACAATCTAGCTGGG	-		LPIN3|64900	MIMAT0000261&MI0000273&hsa-miR-183-5p&offsets|0|-3|TATGGCACTGGTAGAATTC	chr17.trna42-LeuTAG@69.85CCA.17_2_11
-	-	-		VPS72|6944	MIMAT0000750&MI0000802&hsa-miR-340-3p&offsets|0|0|TCCGTCTCAGTTACTTTATAGC	chr1.trna68-GlyGCC@1.24.24_2_10|Out		TPM3|7170	MIMAT0000065&MI0000065&hsa-let-7d-5p&offsets|0|0|AGAGGTAGTAGGTTGCATAGTT	-		TRMT1|55621	MIMAT0000728&MI0000783&hsa-miR-375&offsets|+1|0|TTGTTCGTTCGGCTCGCGTGA	chr17.trna15-CysGCA@1.29.29_1_5|Out
-	-	-		REEP4|80346	MIMAT0000085&MI0000086&hsa-miR-28-5p&offsets|0|0|AAGGAGCTCACAGTCTATTGAG	chr1.trna34-LeuCAG@1.25.25_1_9|Out		COPE|11316	MIMAT0004571&MI0000342&hsa-miR-200b-5p&offsets|0|-1|CATCTTACTGGGCAGCATTGG	-		GOLGA8B|440270	MIMAT0000081&MI0000082&hsa-miR-25-3p&offsets|0|-6|CATTGCACTTGTCTCG	chrMT.trnaMT-GluTTC@41.70C.30_1_2
-	-	-		DSN1|79980	MIMAT0000078&MI0000079&hsa-miR-23a-3p&offsets|0|-3,MIMAT0000418&MI0000439&hsa-miR-23b-3p&offsets|0|-3|ATCACATTGCCAGGGATT	chr15.trna7-GlnCTG@15.35.21_1_7|Out		RAG1AP1|55974	MIMAT0003393&MI0001448&hsa-miR-425-5p&offsets|0|0|AATGACACGATCACTCCCGTTGA	-		HLA-F|3134	MI0000469&hsa-mir-125a&coords|19|+|52196503|52196520|ATGTTGCCAGTCTCTAGG	chr17.trna19-ArgTCG@1.19.19_1_1
-	-	-		FLAD1|80308	MIMAT0000222&MI0000234&hsa-miR-192-5p&offsets|0|+1|CTGACCTATGAATTGACAGCCA	-		PYCRL|65263	MIMAT0004799&MI0003599&hsa-miR-589-5p&offsets|0|0|TGAGAACCACGTCTGCTCTGAG	-		KRT16|3868	MIMAT0022726&MI0006443&hsa-miR-1306-5p&offsets|0|-1|CCACCTCCCCTGCAAACGTCC	chr1.trna111-HisGTG@8.29.22_1_10|Out
-	-	-		TMEM132A|54972	MIMAT0000280&MI0000300&hsa-miR-223-3p&offsets|0|-3|TGTCAGTTTGTCAAATACC	Downregulated		GADD45GIP1|90480	MIMAT0004688&MI0000782&hsa-miR-374a-3p&offsets|0|0|CTTATCAGATTGTATTGTAATT	-		ZFP64|55734	MIMAT0003393&MI0001448&hsa-miR-425-5p&offsets|+1|+2|ATGACACGATCACTCCCGTTGAGT	chrMT.trnaMT-ValTAC@51.70C.20_1_1
-	-	-		C6orf153|88745	MIMAT0004559&MI0000271&hsa-miR-181c-3p&offsets|+1|+1|ACCATCGACCGTTGAGTGGACC	chr1.trna111-HisGTG@-1T.20.21_1_9		MCM7|4176	MIMAT0004484&MI0000065&hsa-let-7d-3p&offsets|+1|-1|TATACGACCTGCTGCCTTTC	-		HDGFRP2|84717	MIMAT0000447&MI0000474&hsa-miR-134-5p&offsets|0|-3|TGTGACTGGTTGACCAGAG	chr1.trna111-HisGTG@13.33.21_1_9
-	-	-		IDH2|3418	MIMAT0000757&MI0000809&hsa-miR-151a-3p&offsets|-2|-2|TACTAGACTGAAGCTCCTTGA	chr1.trna111-HisGTG@-1T.21.22_1_9		BAX|581	MIMAT0002876&MI0003190&hsa-miR-505-3p&offsets|0|-1|CGTCAACACTTGCTGGTTTCC	-		USP19|10869	MIMAT0004502&MI0000086&hsa-miR-28-3p&offsets|+1|0|ACTAGATTGTGAGCTCCTGGA	chr15.trna7-GlnCTG@1.29.29_1_7|Out
-	-	-		STIP1|10963	MIMAT0000222&MI0000234&hsa-miR-192-5p&offsets|0|0|CTGACCTATGAATTGACAGCC	chr1.trna111-HisGTG@-1A.20.21_1_9		ZSWIM4|65249	MIMAT0004926&MI0005543&hsa-miR-708-5p&offsets|0|-2|AAGGAGCTTACAATCTAGCTG	-		TBC1D22A|25771	MIMAT0026472&MI0000064&hsa-let-7c-3p&offsets|0|0|CTGTACAACCTTCTAGCTTTCC	chrMT.trnaMT-ValTAC@55.72CCA.18_1_1
-	-	-		RAG1AP1|55974	MIMAT0000080&MI0000081&hsa-miR-24-3p&offsets|-1|-2,MIMAT0000080&MI0000080&hsa-miR-24-3p&offsets|-1|-2|CTGGCTCAGTTCAGCAGGAAC	chr1.trna111-HisGTG@-1A.22.23_1_9		ATAD2|29028	MIMAT0005792&MI0003776&hsa-miR-320b&offsets|0|-2,MIMAT0005792&MI0003839&hsa-miR-320b&offsets|0|-2,MIMAT0000510&MI0000542&hsa-miR-320a&offsets|0|-2|AAAAGCTGGGTTGAGAGGGC	-		CMAH|8418	MIMAT0000728&MI0000783&hsa-miR-375&offsets|0|-1|TTTGTTCGTTCGGCTCGCGTG	-
-	-	-		CDCA7|83879	MIMAT0000256&MI0000289&hsa-miR-181a-5p&offsets|0|+1,MIMAT0000256&MI0000269&hsa-miR-181a-5p&offsets|0|+1|AACATTCAACGCTGTCGGTGAGTT	chr1.trna111-HisGTG@-1T.19.20_1_9		PPP1CA|5499	MIMAT0000460&MI0000488&hsa-miR-194-5p&offsets|0|0,MIMAT0000460&MI0000732&hsa-miR-194-5p&offsets|0|0|TGTAACAGCAACTCCATGTGGA	-		ASB6|140459	MIMAT0000450&MI0000478&hsa-miR-149-5p&offsets|0|-2|TCTGGCTCCGTGTCTTCACTC	-
-	-	-		CXCL11|6373	MI0000077&hsa-mir-21&coords|17|+|57918616|57918633|CTGTACCACCTTGTCGGG	chr1.trna111-HisGTG@-1T.22.23_1_9		C20orf24|55969	MIMAT0000264&MI0000283&hsa-miR-203a&offsets|0|0|GTGAAATGTTTAGGACCACTAG	-		RRP9|9136	MIMAT0000440&MI0000465&hsa-miR-191-5p&offsets|+1|-1|AACGGAATCCCAAAAGCAGCT	-
-	-	-		ADAM8|101	MIMAT0000065&MI0000065&hsa-let-7d-5p&offsets|0|+1|AGAGGTAGTAGGTTGCATAGTTT	chr1.trna111-HisGTG@-1T.18.19_1_9		LSM7|51690	MIMAT0000692&MI0000749&hsa-miR-30e-5p&offsets|0|+1|TGTAAACATCCTTGACTGGAAGC	-		RILPL1|353116	MIMAT0019208&MI0014181&hsa-miR-3074-5p&offsets|0|+1|GTTCCTGCTGAACTGAGCCAGT	-
-	-	-		CACYBP|27101	MIMAT0000682&MI0000737&hsa-miR-200a-3p&offsets|0|0|TAACACTGTCTGGTAACGATGT	chr1.trna111-HisGTG@-1A.23.24_1_9		CCT3|7203	MIMAT0004509&MI0000095&hsa-miR-93-3p&offsets|0|+1|ACTGCTGAGCTAGCACTTCCCGA	-		ARHGEF19|128272	MIMAT0000069&MI0000070&hsa-miR-16-5p&offsets|0|0,MIMAT0000069&MI0000115&hsa-miR-16-5p&offsets|0|0|TAGCAGCACGTAAATATTGGCG	-
-	-	-		PRDX4|10549	MIMAT0004697&MI0000809&hsa-miR-151a-5p&offsets|0|+1|TCGAGGAGCTCACAGTCTAGTA	chr1.trna111-HisGTG@-1T.23.24_1_9		CHAF1B|8208	MIMAT0004558&MI0000269&hsa-miR-181a-2-3p&offsets|-1|-2|AACCACTGACCGTTGACTGTA	-		MIB2|142678	MIMAT0000710&MI0000767&hsa-miR-365a-3p&offsets|0|-1,MIMAT0022834&MI0000769&hsa-miR-365b-3p&offsets|0|-1|TAATGCCCCTAAAAATCCTTA	-
-	-	-		CCNF|899	MIMAT0004493&MI0000076&hsa-miR-20a-3p&offsets|+1|+1|CTGCATTATGAGCACTTAAAGT	chr15.trna7-GlnCTG@19.41.23_1_7		CHTF18|63922	MIMAT0022692&MI0000270&hsa-miR-181b-3p&offsets|0|0|CTCACTGAACAATGAATGCAA	-		ELL|8178	MIMAT0000256&MI0000289&hsa-miR-181a-5p&offsets|+1|-1,MIMAT0000256&MI0000269&hsa-miR-181a-5p&offsets|+1|-1|ACATTCAACGCTGTCGGTGAG	-
-	-	-		NUP93|9688	MIMAT0000441&MI0000466&hsa-miR-9-5p&offsets|0|0,MIMAT0000441&MI0000468&hsa-miR-9-5p&offsets|0|0,MIMAT0000441&MI0000467&hsa-miR-9-5p&offsets|0|0|TCTTTGGTTATCTAGCTGTATGA	chr17.trna18-ArgCCT@35.54.20_1_5		PMF1|11243	MIMAT0000104&MI0000114&hsa-miR-107&offsets|0|-2,MIMAT0000101&MI0000108&hsa-miR-103a-3p&offsets|0|-2,MIMAT0000101&MI0000109&hsa-miR-103a-3p&offsets|0|-2|AGCAGCATTGTACAGGGCTAT	-		C1orf63|57035	MIMAT0000728&MI0000783&hsa-miR-375&offsets|-1|0|TTTTGTTCGTTCGGCTCGCGTGA	-
-	-	-		NOP2|4839	MIMAT0000617&MI0000650&hsa-miR-200c-3p&offsets|+1|0|AATACTGCCGGGTAATGATGGA	chr15.trna7-GlnCTG@20.41.22_1_7		TCF19|6941	MIMAT0000692&MI0000749&hsa-miR-30e-5p&offsets|0|-1|TGTAAACATCCTTGACTGGAA	-		C9orf69|90120	MIMAT0022692&MI0000270&hsa-miR-181b-3p&offsets|0|-2|CTCACTGAACAATGAATGC	-
-	-	-		PFDN2|5202	MIMAT0000692&MI0000749&hsa-miR-30e-5p&offsets|+1|+3|GTAAACATCCTTGACTGGAAGCTG	chr15.trna7-GlnCTG@19.40.22_1_7		SIRT7|51547	MIMAT0000104&MI0000114&hsa-miR-107&offsets|0|0|AGCAGCATTGTACAGGGCTATCA	-		LSP1|4046	MIMAT0001341&MI0001446&hsa-miR-424-5p&offsets|0|0|CAGCAGCAATTCATGTTTTGAA	-
-	-	-		SRPK1|6732	MIMAT0000257&MI0000270&hsa-miR-181b-5p&offsets|0|+1,MIMAT0000257&MI0000683&hsa-miR-181b-5p&offsets|0|+1|AACATTCATTGCTGTCGGTGGGTT	chr1.trna111-HisGTG@4.30.27_1_9|Out		MTHFD1L|25902	MIMAT0000101&MI0000108&hsa-miR-103a-3p&offsets|+2|+1,MIMAT0000101&MI0000109&hsa-miR-103a-3p&offsets|+2|+1|CAGCATTGTACAGGGCTATGAA	-		CCDC92|80212	MIMAT0000088&MI0000088&hsa-miR-30a-3p&offsets|+1|-2|TTTCAGTCGGATGTTTGCA	-
-	-	-		C8orf76|84933	MIMAT0000760&MI0000812&hsa-miR-331-3p&offsets|0|0|GCCCCTGGGCCTATCCTAGAA	chr14.trna3-ProTGG@54.75CCA.22_3_21		TUBA1B|10376	MIMAT0004697&MI0000809&hsa-miR-151a-5p&offsets|0|+1|TCGAGGAGCTCACAGTCTAGTA	-		ANKZF1|55139	MIMAT0000253&MI0000266&hsa-miR-10a-5p&offsets|-1|-1|ATACCCTGTAGATCCGAATTTGT	-
-	-	-		TIMELESS|8914	MIMAT0000243&MI0000253&hsa-miR-148a-3p&offsets|0|-3|TCAGTGCACTACAGAACTT	chr15.trna7-GlnCTG@20.40.21_1_7|Out		C8orf30A|51236	MIMAT0000076&MI0000077&hsa-miR-21-5p&offsets|+2|0|GCTTATCAGACTGATGTTGA	-		REXO1|57455	MIMAT0000076&MI0000077&hsa-miR-21-5p&offsets|+1|0|AGCTTATCAGACTGATGTTGA	-
-	-	-		LAPTM4B|55353	MIMAT0000104&MI0000114&hsa-miR-107&offsets|0|0|AGCAGCATTGTACAGGGCTATCA	chr17.trna16-GlnTTG@19.40.22_1_5|Out		C6orf108|10591	MIMAT0003338&MI0003684&hsa-miR-660-5p&offsets|0|+1|TACCCATTGCATATCGGAGTTGT	-		ADRBK1|156	MIMAT0000244&MI0000736&hsa-miR-30c-5p&offsets|0|0,MIMAT0000244&MI0000254&hsa-miR-30c-5p&offsets|0|0|TGTAAACATCCTACACTCTCAGC	-
-	-	-		C21orf45|54069	MIMAT0003393&MI0001448&hsa-miR-425-5p&offsets|0|+2|AATGACACGATCACTCCCGTTGAGT	chr13.trna5-GluTTC@8.30.23_1_4		LEMD2|221496	MIMAT0000222&MI0000234&hsa-miR-192-5p&offsets|0|-2|CTGACCTATGAATTGACAG	-		ARFRP1|10139	MIMAT0000099&MI0000103&hsa-miR-101-3p&offsets|0|-2,MIMAT0000099&MI0000739&hsa-miR-101-3p&offsets|0|-2|TACAGTACTGTGATAACTG	-
-	-	-		LIMD2|80774	MIMAT0004611&MI0000482&hsa-miR-185-3p&offsets|0|-2|AGGGGCTGGCTTTCCTCTGG	chr17.trna23-ArgCCG@35.54.20_1_1		YIF1A|10897	MIMAT0000222&MI0000234&hsa-miR-192-5p&offsets|+1|0|TGACCTATGAATTGACAGCC	-		AP4B1|10717	MIMAT0000226&MI0000279&hsa-miR-196a-5p&offsets|0|+1|TAGGTAGTTTCATGTTGTTGGGA	-
-	-	-		MEX3A|92312	MIMAT0004797&MI0003589&hsa-miR-582-3p&offsets|0|-3|TAACTGGTTGAACAACTGA	chr19.trna2-GlyTCC@32.53.22_1_8		TAGLN2|8407	MIMAT0000078&MI0000079&hsa-miR-23a-3p&offsets|0|-2|ATCACATTGCCAGGGATTT	-		NPIP|9284	MI0000469&hsa-mir-125a&coords|19|+|52196502|52196520|CATGTTGCCAGTCTCTAGG	-
-	-	-		PSMD14|10213	MIMAT0000440&MI0000465&hsa-miR-191-5p&offsets|0|0|CAACGGAATCCCAAAAGCAGCTG	chr12.trna5-AspGTC@32.53.22_1_14		DRAP1|10589	MIMAT0003218&MI0003560&hsa-miR-92b-3p&offsets|0|-1|TATTGCACTCGTCCCGGCCTC	-		LAMA5|3911	MIMAT0000693&MI0000749&hsa-miR-30e-3p&offsets|-1|-1|GCTTTCAGTCGGATGTTTACAG	-
-	-	-		RCC1|1104	MIMAT0000243&MI0000253&hsa-miR-148a-3p&offsets|0|0|TCAGTGCACTACAGAACTTTGT	chr13.trna5-GluTTC@8.31.24_1_4		TUBB|203068	MIMAT0000074&MI0000074&hsa-miR-19b-3p&offsets|0|0,MIMAT0000074&MI0000075&hsa-miR-19b-3p&offsets|0|0|TGTGCAAATCCATGCAAAACTGA	-		ZNF512B|57473	MIMAT0000445&MI0000471&hsa-miR-126-3p&offsets|+1|-1|CGTACCGTGAGTAATAATGC	-
-	-	-		YIF1B|90522	MIMAT0000257&MI0000270&hsa-miR-181b-5p&offsets|+1|-1,MIMAT0000257&MI0000683&hsa-miR-181b-5p&offsets|+1|-1|ACATTCATTGCTGTCGGTGGG	chr17.trna16-GlnTTG@19.41.23_1_5|Out		C9orf140|89958	MIMAT0000270&MI0000289&hsa-miR-181a-3p&offsets|0|0|ACCATCGACCGTTGATTGTACC	-		LONP1|9361	MIMAT0000689&MI0000746&hsa-miR-99b-5p&offsets|0|-2|CACCCGTAGAACCGACCTTG	-
-	-	-		CDC123|8872	MIMAT0017990&MI0016003&hsa-miR-3613-5p&offsets|0|0|TGTTGTACTTTTTTTTTTGTTC	chr14.trna3-ProTGG@58.75CCA.18_3_21|Out		ATP13A1|57130	MIMAT0000096&MI0000100&hsa-miR-98-5p&offsets|0|+1|TGAGGTAGTAAGTTGTATTGTTG	-		C19orf66|55337	MIMAT0003258&MI0003602&hsa-miR-590-5p&offsets|0|0|GAGCTTATTCATAAAAGTGCAG	-
-	-	-		MCM6|4175	MIMAT0004672&MI0000734&hsa-miR-106b-3p&offsets|0|-1|CCGCACTGTGGGTACTTGCTG	chr17.trna36-ThrAGT@56.77CCA.22_1_4		DAZAP1|26528	MIMAT0000417&MI0000438&hsa-miR-15b-5p&offsets|0|-2|TAGCAGCACATCATGGTTTA	-		TSSC4|10078	MIMAT0000253&MI0000266&hsa-miR-10a-5p&offsets|0|-7|TACCCTGTAGATCCGA	-
-	-	-		TOR3A|64222	MIMAT0000243&MI0000253&hsa-miR-148a-3p&offsets|+1|+1|CAGTGCACTACAGAACTTTGTC	chr19.trna2-GlyTCC@31.53.23_1_8		FAM100B|283991	MIMAT0000270&MI0000289&hsa-miR-181a-3p&offsets|0|-3|ACCATCGACCGTTGATTGT	-		C17orf49|124944	MIMAT0003283&MI0003628&hsa-miR-615-3p&offsets|0|0|TCCGAGCCTGGGTCTCCCTCTT	-
-	-	-		PFN1|5216	MIMAT0000510&MI0000542&hsa-miR-320a&offsets|+2|+2|AAGCTGGGTTGAGAGGGCGAAA	chr1.trna111-HisGTG@2.30.29_1_9		HGS|9146	MIMAT0000757&MI0000809&hsa-miR-151a-3p&offsets|-1|-2|ACTAGACTGAAGCTCCTTGA	-		TTLL12|23170	MIMAT0000266&MI0000285&hsa-miR-205-5p&offsets|0|-5|TCCTTCATTCCACCGGA	-
-	-	-		PSMB2|5690	MIMAT0000243&MI0000253&hsa-miR-148a-3p&offsets|-1|0|GTCAGTGCACTACAGAACTTTGT	chr6.trna10-AlaCGC@54.75CCA.22_2_5		C1orf31|388753	MIMAT0000432&MI0000457&hsa-miR-141-3p&offsets|0|-1|TAACACTGTCTGGTAAAGATG	-		RTEL1|51750	MIMAT0000226&MI0000279&hsa-miR-196a-5p&offsets|0|0,MIMAT0000226&MI0000238&hsa-miR-196a-5p&offsets|0|0|TAGGTAGTTTCATGTTGTTGGG	-
-	-	-		MTERFD1|51001	MIMAT0000432&MI0000457&hsa-miR-141-3p&offsets|0|-2|TAACACTGTCTGGTAAAGAT	chr15.trna7-GlnCTG@23.40.18_1_13|Out		CCDC124|115098	MIMAT0000080&MI0000081&hsa-miR-24-3p&offsets|-1|-1,MIMAT0000080&MI0000080&hsa-miR-24-3p&offsets|-1|-1|CTGGCTCAGTTCAGCAGGAACA	-		FCHSD1|89848	MIMAT0001080&MI0001150&hsa-miR-196b-5p&offsets|0|0|TAGGTAGTTTCCTGTTGTTGGG	-
-	-	-		PAFAH1B3|5050	MIMAT0002809&MI0003129&hsa-miR-146b-5p&offsets|0|+1|TGAGAACTGAATTCCATAGGCTG	chr16.trna11-ProAGG@8.30.23_3_18|Out		MIIP|60672	MIMAT0004558&MI0000269&hsa-miR-181a-2-3p&offsets|0|+1|ACCACTGACCGTTGACTGTACCT	-		SHANK3|85358	MIMAT0000689&MI0000746&hsa-miR-99b-5p&offsets|0|0|CACCCGTAGAACCGACCTTGCG	-
-	-	-		TCF19|6941	MIMAT0004481&MI0000062&hsa-let-7a-3p&offsets|0|0,MIMAT0004481&MI0000060&hsa-let-7a-3p&offsets|0|0|CTATACAATCTACTGTCTTTC	chr6.trna101-AlaAGC@54.75CCA.22_1_3		RALY|22913	MIMAT0000434&MI0000458&hsa-miR-142-3p&offsets|+1|-2|GTAGTGTTTCCTACTTTATG	-		PGAM5|192111	MIMAT0000093&MI0000095&hsa-miR-93-5p&offsets|+2|0|AAGTGCTGTTCGTGCAGGTAG	-
-	-	-		MAZ|4150	MIMAT0000757&MI0000809&hsa-miR-151a-3p&offsets|-1|0|ACTAGACTGAAGCTCCTTGAGG	chrMT.trnaMT-PheGAA@59.74CCA.16_1_1|Out		WDR34|89891	MIMAT0000093&MI0000095&hsa-miR-93-5p&offsets|+1|0|AAAGTGCTGTTCGTGCAGGTAG	-		CD37|951	MIMAT0017990&MI0016003&hsa-miR-3613-5p&offsets|0|0|TGTTGTACTTTTTTTTTTGTTC	-
-	-	-		RPN1|6184	MIMAT0000222&MI0000234&hsa-miR-192-5p&offsets|0|-1|CTGACCTATGAATTGACAGC	chr17.trna16-GlnTTG@12.31.20_2_12|Out		S100P|6286	MIMAT0001536&MI0001641&hsa-miR-429&offsets|0|-1|TAATACTGTCTGGTAAAACCG	-		ICOSLG|23308	MIMAT0000254&MI0000267&hsa-miR-10b-5p&offsets|+3|-1|CCTGTAGAACCGAATTTGT	-
-	-	-		KCTD5|54442	MIMAT0000243&MI0000253&hsa-miR-148a-3p&offsets|0|-2|TCAGTGCACTACAGAACTTT	chr15.trna7-GlnCTG@34.53.20_1_11		TPI1|7167	MIMAT0000646&MI0000681&hsa-miR-155-5p&offsets|0|-2|TTAATGCTAATCGTGATAGGG	-		RNF44|22838	MIMAT0000710&MI0000767&hsa-miR-365a-3p&offsets|0|0,MIMAT0022834&MI0000769&hsa-miR-365b-3p&offsets|0|0|TAATGCCCCTAAAAATCCTTAT	-
-	-	-		GLT25D1|79709	MIMAT0004692&MI0000802&hsa-miR-340-5p&offsets|0|-1|TTATAAAGCAATGAGACTGAT	chr17.trna16-GlnTTG@8.30.23_2_13|Out		HIST2H2AA3|8337	MIMAT0001620&MI0000737&hsa-miR-200a-5p&offsets|0|+1|CATCTTACCGGACAGTGCTGGAT	-		NFKBIL2|4796	MIMAT0000243&MI0000253&hsa-miR-148a-3p&offsets|0|+1|TCAGTGCACTACAGAACTTTGTC	-
-	-	-		PPM1G|5496	MIMAT0000617&MI0000650&hsa-miR-200c-3p&offsets|0|0|TAATACTGCCGGGTAATGATGGA	chrMT.trnaMT-GluTTC@41.62.22_1_2		FAM111B|374393	MIMAT0000226&MI0000279&hsa-miR-196a-5p&offsets|0|-1,MIMAT0000226&MI0000238&hsa-miR-196a-5p&offsets|0|-1|TAGGTAGTTTCATGTTGTTGG	-		COBRA1|25920	MIMAT0000754&MI0000806&hsa-miR-337-3p&offsets|0|0|CTCCTATATGATGCCTTTCTTC	-
-	-	-		HNRNPAB|3182	MIMAT0003150&MI0003513&hsa-miR-455-5p&offsets|0|0|TATGTGCCTTTGGACTACATCG	chr17.trna16-GlnTTG@32.53.22_1_4		ANAPC11|51529	MIMAT0004584&MI0000433&hsa-let-7g-3p&offsets|0|0|CTGTACAGGCCACTGCCTTGC	-		ATP2A3|489	MIMAT0000253&MI0000266&hsa-miR-10a-5p&offsets|0|-5|TACCCTGTAGATCCGAAT	-
-	-	-		SMS|6611	MIMAT0000510&MI0000542&hsa-miR-320a&offsets|+2|+1|AAGCTGGGTTGAGAGGGCGAA	chr17.trna16-GlnTTG@11.31.21_2_12|Out		MRPL9|65005	MIMAT0004810&MI0003643&hsa-miR-629-5p&offsets|0|+1|TGGGTTTACGTTGGGAGAACTT	-		MRPL4|51073	MIMAT0004481&MI0000062&hsa-let-7a-3p&offsets|0|0,MIMAT0004481&MI0000060&hsa-let-7a-3p&offsets|0|0|CTATACAATCTACTGTCTTTC	-
-	-	-		PSMC4|5704	MIMAT0004774&MI0003185&hsa-miR-501-3p&offsets|+1|+1|ATGCACCCGGGCAAGGATTCTG	chr17.trna16-GlnTTG@8.31.24_2_12|Out		CALR|811	MIMAT0002809&MI0003129&hsa-miR-146b-5p&offsets|0|+2|TGAGAACTGAATTCCATAGGCTGT	-		DUS3L|56931	MIMAT0000253&MI0000266&hsa-miR-10a-5p&offsets|+2|+1|CCCTGTAGATCCGAATTTGTGT	-
-	-	-		NCAPG2|54892	MIMAT0000761&MI0000813&hsa-miR-324-5p&offsets|0|-1|CGCATCCCCTAGGGCATTGGTG	chr17.trna16-GlnTTG@9.30.22_2_13|Out		ARFGAP1|55738	MIMAT0015378&MI0014228&hsa-miR-3065-3p&offsets|0|-1|TCAGCACCAGGATATTGTTGGA	-		LIMD2|80774	MIMAT0000232&MI0000281&hsa-miR-199a-3p&offsets|+1|-2,MIMAT0000232&MI0000242&hsa-miR-199a-3p&offsets|+1|-2,MIMAT0004563&MI0000282&hsa-miR-199b-3p&offsets|+1|-2|CAGTAGTCTGCACATTGGT	-
-	-	-		TCEB1|6921	MIMAT0000259&MI0000272&hsa-miR-182-5p&offsets|0|-3|TTTGGCAATGGTAGAACTCAC	chr16.trna17-LeuCAG@70.86CCA.17_2_7|Out		RPUSD1|113000	MIMAT0000068&MI0000069&hsa-miR-15a-5p&offsets|0|+1|TAGCAGCACATAATGGTTTGTGG	-		KLHDC8B|200942	MIMAT0000692&MI0000749&hsa-miR-30e-5p&offsets|0|-4|TGTAAACATCCTTGACTG	-
-	-	-		ZWILCH|55055	MIMAT0000689&MI0000746&hsa-miR-99b-5p&offsets|+1|0|ACCCGTAGAACCGACCTTGCG	chrMT.trnaMT-TyrGTA@11.32.22_1_1|Out		SDC1|6382	MIMAT0000256&MI0000289&hsa-miR-181a-5p&offsets|0|0,MIMAT0000256&MI0000269&hsa-miR-181a-5p&offsets|0|0|AACATTCAACGCTGTCGGTGAGT	-		DUSP23|54935	MIMAT0001631&MI0001729&hsa-miR-451a&offsets|+1|-2|AACCGTTACCATTACTGAG	-
-	-	-		BCL2L12|83596	MIMAT0000070&MI0000071&hsa-miR-17-5p&offsets|0|-1|CAAAGTGCTTACAGTGCAGGTA	chr6.trna51-SerTGA@1.18.18_2_12		PRDX1|5052	MIMAT0000222&MI0000234&hsa-miR-192-5p&offsets|0|-1|CTGACCTATGAATTGACAGC	-		LSMD1|84316	MIMAT0001631&MI0001729&hsa-miR-451a&offsets|+1|0|AACCGTTACCATTACTGAGTT	-
-	-	-		C9orf140|89958	MIMAT0004697&MI0000809&hsa-miR-151a-5p&offsets|0|+2|TCGAGGAGCTCACAGTCTAGTAT	chr17.trna15-CysGCA@58.75CCA.18_1_10		TSTA3|7264	MIMAT0000070&MI0000071&hsa-miR-17-5p&offsets|0|-1|CAAAGTGCTTACAGTGCAGGTA	-		FAM73B|84895	MIMAT0004776&MI0003190&hsa-miR-505-5p&offsets|0|+1|GGGAGCCAGGAAGTATTGATGTT	-
-	-	-		RIPK2|8767	MIMAT0000259&MI0000272&hsa-miR-182-5p&offsets|+1|-1|TTGGCAATGGTAGAACTCACAC	chr17.trna16-GlnTTG@16.31.16_2_12|Out		CARM1|10498	MIMAT0000076&MI0000077&hsa-miR-21-5p&offsets|+4|0|TTATCAGACTGATGTTGA	-		AXIN1|8312	MIMAT0000445&MI0000471&hsa-miR-126-3p&offsets|+1|-2|CGTACCGTGAGTAATAATG	-
-	-	-		PDCD5|9141	MIMAT0000432&MI0000457&hsa-miR-141-3p&offsets|0|-4|TAACACTGTCTGGTAAAG	chr6.trna14-TyrGTA@55.76CCA.22_1_2		C15orf23|90417	MIMAT0004494&MI0000077&hsa-miR-21-3p&offsets|0|-4|CAACACCAGTCGATGGG	-		IMP4|92856	MIMAT0004774&MI0003185&hsa-miR-501-3p&offsets|0|+1|AATGCACCCGGGCAAGGATTCTG	-
-	-	-		SF3B4|10262	MIMAT0000065&MI0000065&hsa-let-7d-5p&offsets|+1|0|GAGGTAGTAGGTTGCATAGTT	chrMT.trnaMT-TyrGTA@12.32.21_1_1|Out		TBCB|1155	MIMAT0000222&MI0000234&hsa-miR-192-5p&offsets|+1|+3|TGACCTATGAATTGACAGCCAGT	-		MAPKBP1|23005	MIMAT0000243&MI0000253&hsa-miR-148a-3p&offsets|0|0|TCAGTGCACTACAGAACTTTGT	-
-	-	-		NCAPD2|9918	MIMAT0002876&MI0003190&hsa-miR-505-3p&offsets|0|0|CGTCAACACTTGCTGGTTTCCT	chr16.trna17-LeuCAG@65.86CCA.22_2_7		CAPG|822	MIMAT0004810&MI0003643&hsa-miR-629-5p&offsets|0|-1|TGGGTTTACGTTGGGAGAAC	-		RHOT2|89941	MIMAT0004819&MI0003760&hsa-miR-671-3p&offsets|0|0|TCCGGTTCTCAGGGCTCCACC	-
-	-	-		LIMK1|3984	MIMAT0000692&MI0000749&hsa-miR-30e-5p&offsets|0|0|TGTAAACATCCTTGACTGGAAG	chrMT.trnaMT-GluTTC@41.70C.30_1_2		IMPA2|3613	MIMAT0000227&MI0000239&hsa-miR-197-3p&offsets|0|-1|TTCACCACCTTCTCCACCCAG	-		CEBPD|1052	MIMAT0000101&MI0000108&hsa-miR-103a-3p&offsets|+4|0,MIMAT0000101&MI0000109&hsa-miR-103a-3p&offsets|+4|0|GCATTGTACAGGGCTATGA	-
-	-	-		APOBEC3B|9582	MIMAT0003218&MI0003560&hsa-miR-92b-3p&offsets|0|-1|TATTGCACTCGTCCCGGCCTC	chr17.trna16-GlnTTG@23.40.18_1_5|Out		SDF2L1|23753	MIMAT0004497&MI0000081&hsa-miR-24-2-5p&offsets|-1|0|GTGCCTACTGAGCTGAAACACAG	-		FAM3A|60343	MIMAT0000266&MI0000285&hsa-miR-205-5p&offsets|0|-4|TCCTTCATTCCACCGGAG	-
-	-	-		MCM3|4172	MIMAT0000257&MI0000270&hsa-miR-181b-5p&offsets|0|-1,MIMAT0000257&MI0000683&hsa-miR-181b-5p&offsets|0|-1|AACATTCATTGCTGTCGGTGGG	chr2.trna2-TyrGTA@59.76CCA.18_1_7		RCC1|1104	MIMAT0000090&MI0000090&hsa-miR-32-5p&offsets|0|-2|TATTGCACATTACTAAGTTG	-		MFNG|4242	MIMAT0004481&MI0000062&hsa-let-7a-3p&offsets|0|-1,MIMAT0004481&MI0000060&hsa-let-7a-3p&offsets|0|-1|CTATACAATCTACTGTCTTT	-
-	-	-		RABIF|5877	MIMAT0000257&MI0000270&hsa-miR-181b-5p&offsets|+1|0,MIMAT0000257&MI0000683&hsa-miR-181b-5p&offsets|+1|0|ACATTCATTGCTGTCGGTGGGT	chr11.trna12-ProTGG@32.53.22_1_1		ARF1|375	MIMAT0003258&MI0003602&hsa-miR-590-5p&offsets|0|0|GAGCTTATTCATAAAAGTGCAG	-		CDC42EP3|10602	MIMAT0000450&MI0000478&hsa-miR-149-5p&offsets|0|-1|TCTGGCTCCGTGTCTTCACTCC	-
-	-	-		ASNS|440	MIMAT0003393&MI0001448&hsa-miR-425-5p&offsets|0|+1|AATGACACGATCACTCCCGTTGAG	chrMT.trnaMT-ValTAC@56.72CCA.17_1_1		ILF2|3608	MIMAT0000101&MI0000108&hsa-miR-103a-3p&offsets|0|+1,MIMAT0000101&MI0000109&hsa-miR-103a-3p&offsets|0|+1|AGCAGCATTGTACAGGGCTATGAA	-		MAFK|7975	MIMAT0000254&MI0000267&hsa-miR-10b-5p&offsets|0|-5|TACCCTGTAGAACCGAAT	-
-	-	-		RAN|5901	MIMAT0000227&MI0000239&hsa-miR-197-3p&offsets|0|-1|TTCACCACCTTCTCCACCCAG	chr2.trna2-TyrGTA@55.76CCA.22_1_6		EBP|10682	MIMAT0000073&MI0000073&hsa-miR-19a-3p&offsets|0|-1|TGTGCAAATCTATGCAAAACTG	-		CPSF3L|54973	MIMAT0000617&MI0000650&hsa-miR-200c-3p&offsets|0|-5|TAATACTGCCGGGTAATG	-
-	-	-		MRPS12|6183	MIMAT0000259&MI0000272&hsa-miR-182-5p&offsets|0|-2|TTTGGCAATGGTAGAACTCACA	chr1.trna69-AspGTC@52.73C.22_1_12		TMEM54|113452	MIMAT0000243&MI0000253&hsa-miR-148a-3p&offsets|-1|0|GTCAGTGCACTACAGAACTTTGT	-		ICAM3|3385	MIMAT0000693&MI0000749&hsa-miR-30e-3p&offsets|0|-4|CTTTCAGTCGGATGTTTA	-
-	-	-		CFL1|1072	MI0000077&hsa-mir-21&coords|17|+|57918615|57918633|GCTGTACCACCTTGTCGGG	chr1.trna32-MetCAT@35.57.23_1_8		STRA13|201254	MIMAT0000510&MI0000542&hsa-miR-320a&offsets|+2|+1|AAGCTGGGTTGAGAGGGCGAA	-		MEF2D|4209	MIMAT0000256&MI0000289&hsa-miR-181a-5p&offsets|+1|-2,MIMAT0000256&MI0000269&hsa-miR-181a-5p&offsets|+1|-2|ACATTCAACGCTGTCGGTGA	-
-	-	-		CTHRC1|115908	MIMAT0000680&MI0000734&hsa-miR-106b-5p&offsets|0|-2|TAAAGTGCTGACAGTGCAG	chrMT.trnaMT-ValTAC@51.72CCA.22_1_1		NT5DC2|64943	MIMAT0004927&MI0005543&hsa-miR-708-3p&offsets|0|0|CAACTAGACTGTGAGCTTCTAG	-		ZDHHC8|29801	MIMAT0000759&MI0000811&hsa-miR-148b-3p&offsets|0|0|TCAGTGCATCACAGAACTTTGT	-
-	-	-		MAGED1|9500	MIMAT0000761&MI0000813&hsa-miR-324-5p&offsets|0|0|CGCATCCCCTAGGGCATTGGTGT	chr17.trna16-GlnTTG@11.30.20_2_13|Out		TRAF2|7186	MIMAT0005825&MI0006273&hsa-miR-1180-3p&offsets|0|0|TTTCCGGCTCGCGTGGGTGTGT	-		AKNA|80709	MIMAT0000510&MI0000542&hsa-miR-320a&offsets|+1|-1|AAAGCTGGGTTGAGAGGGCG	-
-	-	-		ANP32E|81611	MIMAT0000261&MI0000273&hsa-miR-183-5p&offsets|0|-2|TATGGCACTGGTAGAATTCA	chr1.trna35-GlyGCC@16.35.20_1_13|Out		FANCI|55215	MIMAT0004810&MI0003643&hsa-miR-629-5p&offsets|0|0|TGGGTTTACGTTGGGAGAACT	-		FTHL3|2498	MI0000469&hsa-mir-125a&coords|19|+|52196504|52196520|TGTTGCCAGTCTCTAGG	-
-	-	-		LAMP3|27074	MIMAT0000264&MI0000283&hsa-miR-203a&offsets|+1|-2|TGAAATGTTTAGGACCACT	chr6.trna10-AlaCGC@1.21.21_3_8		IRAK1|3654	MIMAT0000096&MI0000100&hsa-miR-98-5p&offsets|0|-1|TGAGGTAGTAAGTTGTATTGT	-		CPSF1|29894	MIMAT0000088&MI0000088&hsa-miR-30a-3p&offsets|+1|-1|TTTCAGTCGGATGTTTGCAG	-
-	-	-		CDK2AP1|8099	MIMAT0002888&MI0003205&hsa-miR-532-5p&offsets|0|-2|CATGCCTTGAGTGTAGGACC	chr17.trna42-LeuTAG@64.85CCA.22_2_9		CYC1|1537	MIMAT0000256&MI0000289&hsa-miR-181a-5p&offsets|0|-1,MIMAT0000256&MI0000269&hsa-miR-181a-5p&offsets|0|-1|AACATTCAACGCTGTCGGTGAG	-		CCDC130|81576	MIMAT0001080&MI0001150&hsa-miR-196b-5p&offsets|0|-1|TAGGTAGTTTCCTGTTGTTGG	-
-	-	-		JTB|10899	MIMAT0000424&MI0000447&hsa-miR-128-3p&offsets|0|-2,MIMAT0000424&MI0000727&hsa-miR-128-3p&offsets|0|-2|TCACAGTGAACCGGTCTCT	chr14.trna3-ProTGG@32.53.22_1_6		PGP|283871	MIMAT0000264&MI0000283&hsa-miR-203a&offsets|0|-1|GTGAAATGTTTAGGACCACTA	-		TMC6|11322	MIMAT0000261&MI0000273&hsa-miR-183-5p&offsets|+1|+1|ATGGCACTGGTAGAATTCACTG	-
-	-	-		POLR2H|5437	MIMAT0000692&MI0000749&hsa-miR-30e-5p&offsets|0|-1|TGTAAACATCCTTGACTGGAA	chr15.trna7-GlnCTG@8.34.27_1_7|Out		MMP9|4318	MIMAT0004799&MI0003599&hsa-miR-589-5p&offsets|0|-1|TGAGAACCACGTCTGCTCTGA	-		SOLH|6650	MIMAT0004502&MI0000086&hsa-miR-28-3p&offsets|0|0|CACTAGATTGTGAGCTCCTGGA	-
-	-	-		INTS7|25896	MIMAT0000093&MI0000095&hsa-miR-93-5p&offsets|+1|0|AAAGTGCTGTTCGTGCAGGTAG	chr6.trna14-TyrGTA@59.76CCA.18_1_2		RRP1|8568	MIMAT0003885&MI0003820&hsa-miR-454-3p&offsets|0|0|TAGTGCAATATTGCTTATAGGGT	-		SPEG|10290	MIMAT0026738&MI0006349&hsa-miR-1287-3p&offsets|0|0|CTCTAGCCACAGATGCAGTGAT	-
-	-	-		NFKBIE|4794	MIMAT0000243&MI0000253&hsa-miR-148a-3p&offsets|0|-4|TCAGTGCACTACAGAACT	chr6.trna10-AlaCGC@60.75CCA.16_2_7|Out		TRIM11|81559	MIMAT0000440&MI0000465&hsa-miR-191-5p&offsets|+1|-1|AACGGAATCCCAAAAGCAGCT	-		TRIM65|201292	MIMAT0000254&MI0000267&hsa-miR-10b-5p&offsets|+1|-5|ACCCTGTAGAACCGAAT	-
-	-	-		ACOT7|11332	MIMAT0002876&MI0003190&hsa-miR-505-3p&offsets|+1|0|GTCAACACTTGCTGGTTTCCT	chr1.trna35-GlyGCC@19.38.20_1_12		KIF22|3835	-	-		DOK1|1796	MIMAT0000443&MI0000469&hsa-miR-125a-5p&offsets|0|-4|TCCCTGAGACCCTTTAACCT	-
-	-	-		S100A11|6282	MIMAT0000750&MI0000802&hsa-miR-340-3p&offsets|0|+1|TCCGTCTCAGTTACTTTATAGCC	chr17.trna16-GlnTTG@14.31.18_2_12|Out		ENY2|56943	Downregulated	-		PMVK|10654	MIMAT0000088&MI0000088&hsa-miR-30a-3p&offsets|0|-3|CTTTCAGTCGGATGTTTGC	-
-	-	-		DNAJC9|23234	MIMAT0000449&MI0000477&hsa-miR-146a-5p&offsets|0|-1|TGAGAACTGAATTCCATGGGT	chr1.trna69-AspGTC@52.75CCA.24_1_12		SSR2|6746	MIMAT0000250&MI0000261&hsa-miR-139-5p&offsets|0|-3|TCTACAGTGCACGTGTCTCC	-		DUSP2|1844	MIMAT0000437&MI0000461&hsa-miR-145-5p&offsets|+1|-2|TCCAGTTTTCCCAGGAATCC	-
-	-	-		MTHFD1L|25902	MIMAT0000101&MI0000108&hsa-miR-103a-3p&offsets|+3|0,MIMAT0000101&MI0000109&hsa-miR-103a-3p&offsets|+3|0|AGCATTGTACAGGGCTATGA	-		CDCA4|55038	MIMAT0000250&MI0000261&hsa-miR-139-5p&offsets|0|-2|TCTACAGTGCACGTGTCTCCA	-		MFSD10|10227	MIMAT0004502&MI0000086&hsa-miR-28-3p&offsets|0|+1|CACTAGATTGTGAGCTCCTGGAG	-
-	-	-		BGN|633	MIMAT0004946&MI0005559&hsa-miR-744-3p&offsets|0|-1|CTGTTGCCACTAACCTCAACC	-		KLC2|64837	MIMAT0000250&MI0000261&hsa-miR-139-5p&offsets|0|0|TCTACAGTGCACGTGTCTCCAGT	-		SBF1|6305	MIMAT0000062&MI0000062&hsa-let-7a-5p&offsets|-1|-2|GTGAGGTAGTAGGTTGTATAG	-
-	-	-		SHMT2|6472	MIMAT0004502&MI0000086&hsa-miR-28-3p&offsets|+2|0|CTAGATTGTGAGCTCCTGGA	-		SERPINH1|871	MIMAT0004552&MI0000261&hsa-miR-139-3p&offsets|0|-2|TGGAGACGCGGCCCTGTTGGA	-		GSTM4|2948	MIMAT0000076&MI0000077&hsa-miR-21-5p&offsets|0|-5|TAGCTTATCAGACTGAT	-
-	-	-		MANF|7873	MIMAT0000076&MI0000077&hsa-miR-21-5p&offsets|0|-5|TAGCTTATCAGACTGAT	-		UQCRH|7388	MIMAT0000254&MI0000267&hsa-miR-10b-5p&offsets|0|-5|TACCCTGTAGAACCGAAT	-		TNIP2|79155	MIMAT0000259&MI0000272&hsa-miR-182-5p&offsets|0|-3|TTTGGCAATGGTAGAACTCAC	-
-	-	-		PRDX1|5052	MIMAT0000096&MI0000100&hsa-miR-98-5p&offsets|0|-1|TGAGGTAGTAAGTTGTATTGT	-		ADAM8|101	MIMAT0000254&MI0000267&hsa-miR-10b-5p&offsets|+2|-1|CCCTGTAGAACCGAATTTGT	-		CD79A|973	MIMAT0000445&MI0000471&hsa-miR-126-3p&offsets|-1|-1|CTCGTACCGTGAGTAATAATGC	-
-	-	-		APOA1BP|128240	MIMAT0004571&MI0000342&hsa-miR-200b-5p&offsets|0|-1|CATCTTACTGGGCAGCATTGG	-		RPS6KB2|6199	MIMAT0000250&MI0000261&hsa-miR-139-5p&offsets|0|-1|TCTACAGTGCACGTGTCTCCAG	-		RAB35|11021	MIMAT0000764&MI0000815&hsa-miR-339-5p&offsets|0|-3|TCCCTGTCCTCCAGGAGCTC	-
-	-	-		MRPL9|65005	MIMAT0004509&MI0000095&hsa-miR-93-3p&offsets|0|+1|ACTGCTGAGCTAGCACTTCCCGA	-		SH3BP1|23616	MIMAT0000754&MI0000806&hsa-miR-337-3p&offsets|0|0|CTCCTATATGATGCCTTTCTTC	-		CCDC64B|146439	MIMAT0000728&MI0000783&hsa-miR-375&offsets|0|0|TTTGTTCGTTCGGCTCGCGTGA	-
-	-	-		CCDC99|54908	MIMAT0001340&MI0001445&hsa-miR-423-3p&offsets|0|-2|AGCTCGGTCTGAGGCCCCTCA	-		MOGS|7841	MIMAT0000254&MI0000267&hsa-miR-10b-5p&offsets|+1|-1|ACCCTGTAGAACCGAATTTGT	-		LRCH4|4034	MIMAT0004808&MI0003639&hsa-miR-625-3p&offsets|+1|0|ACTATAGAACTTTCCCCCTCA	-
-	-	-		POP7|10248	MIMAT0000258&MI0000271&hsa-miR-181c-5p&offsets|0|+1|AACATTCAACCTGTCGGTGAGTT	-		MMP13|4322	MIMAT0000254&MI0000267&hsa-miR-10b-5p&offsets|+2|0|CCCTGTAGAACCGAATTTGTG	-		RAMP3|10268	MIMAT0000414&MI0000433&hsa-let-7g-5p&offsets|+3|0|GGTAGTAGTTTGTACAGTT	-
-	-	-		LSR|51599	MIMAT0000441&MI0000466&hsa-miR-9-5p&offsets|0|-2,MIMAT0000441&MI0000468&hsa-miR-9-5p&offsets|0|-2,MIMAT0000441&MI0000467&hsa-miR-9-5p&offsets|0|-2|TCTTTGGTTATCTAGCTGTAT	-		SLC39A1|27173	MIMAT0000437&MI0000461&hsa-miR-145-5p&offsets|+1|-1|TCCAGTTTTCCCAGGAATCCC	-		HOMER3|9454	MIMAT0000261&MI0000273&hsa-miR-183-5p&offsets|+1|+2|ATGGCACTGGTAGAATTCACTGT	-
-	-	-		ATP6V0B|533	MIMAT0004491&MI0000074&hsa-miR-19b-1-5p&offsets|0|-1|AGTTTTGCAGGTTTGCATCCAG	-		INCENP|3619	MIMAT0000437&MI0000461&hsa-miR-145-5p&offsets|+1|0|TCCAGTTTTCCCAGGAATCCCT	-		KLC4|89953	MIMAT0000720&MI0000776&hsa-miR-376c-3p&offsets|0|0|AACATAGAGGAAATTCCACGT	-
-	-	-		DKC1|1736	MIMAT0003338&MI0003684&hsa-miR-660-5p&offsets|0|0|TACCCATTGCATATCGGAGTTG	-		FDPS|2224	MIMAT0000254&MI0000267&hsa-miR-10b-5p&offsets|+2|+1|CCCTGTAGAACCGAATTTGTGT	-		TELO2|9894	MIMAT0004814&MI0003676&hsa-miR-654-3p&offsets|0|-2|TATGTCTGCTGACCATCACC	-
-	-	-		SLC25A39|51629	MIMAT0000762&MI0000813&hsa-miR-324-3p&offsets|-2|0|CCACTGCCCCAGGTGCTGCTGG	-		POLD1|5424	MIMAT0000254&MI0000267&hsa-miR-10b-5p&offsets|+4|-1|CTGTAGAACCGAATTTGT	-		SNHG7|84973	MIMAT0000456&MI0000483&hsa-miR-186-5p&offsets|0|0|CAAAGAATTCTCCTTTTGGGCT	-
-	-	-		CBX3|11335	MIMAT0005951&MI0006444&hsa-miR-1307-3p&offsets|0|+2|ACTCGGCGTGGCGTCGGTCGTGGT	-		C8orf76|84933	MIMAT0000254&MI0000267&hsa-miR-10b-5p&offsets|+1|-4|ACCCTGTAGAACCGAATT	-		DVL2|1856	MIMAT0000244&MI0000736&hsa-miR-30c-5p&offsets|0|-4,MIMAT0000244&MI0000254&hsa-miR-30c-5p&offsets|0|-4|TGTAAACATCCTACACTCT	-
-	-	-		MRPL15|29088	MIMAT0000456&MI0000483&hsa-miR-186-5p&offsets|0|-1|CAAAGAATTCTCCTTTTGGGC	-		UBQLN4|56893	MIMAT0000254&MI0000267&hsa-miR-10b-5p&offsets|0|-3|TACCCTGTAGAACCGAATTT	-		ZBTB7B|51043	MIMAT0000452&MI0000480&hsa-miR-154-5p&offsets|0|0|TAGGTTATCCGTGTTGCCTTCG	-
-	-	-		POLA2|23649	MIMAT0000759&MI0000811&hsa-miR-148b-3p&offsets|0|0|TCAGTGCATCACAGAACTTTGT	-		STX10|8677	MIMAT0000254&MI0000267&hsa-miR-10b-5p&offsets|-1|-1|ATACCCTGTAGAACCGAATTTGT	-		CAPS|828	MIMAT0000086&MI0000087&hsa-miR-29a-3p&offsets|0|-5|TAGCACCATCTGAAATC	-
-	-	-		SNRPB|6628	MIMAT0002871&MI0003184&hsa-miR-500a-3p&offsets|0|0|ATGCACCTGGGCAAGGATTCTG	-		DNAJC9|23234	MIMAT0000254&MI0000267&hsa-miR-10b-5p&offsets|0|-2|TACCCTGTAGAACCGAATTTG	-		TSEN54|283989	MIMAT0000752&MI0000804&hsa-miR-328-3p&offsets|0|0|CTGGCCCTCTCTGCCCTTCCGT	-
-	-	-		HM13|81502	MIMAT0001343&MI0001448&hsa-miR-425-3p&offsets|-1|-2|CATCGGGAATGTCGTGTCCGC	-		MRPL15|29088	MIMAT0000254&MI0000267&hsa-miR-10b-5p&offsets|0|-1|TACCCTGTAGAACCGAATTTGT	-		CCDC85B|11007	MIMAT0000764&MI0000815&hsa-miR-339-5p&offsets|0|0|TCCCTGTCCTCCAGGAGCTCACG	-
-	-	-		PSMA5|5686	MIMAT0004571&MI0000342&hsa-miR-200b-5p&offsets|0|0|CATCTTACTGGGCAGCATTGGA	-		COTL1|23406	MIMAT0000437&MI0000461&hsa-miR-145-5p&offsets|0|-1|GTCCAGTTTTCCCAGGAATCCC	-		MSLN|10232	MIMAT0000232&MI0000281&hsa-miR-199a-3p&offsets|0|-1,MIMAT0000232&MI0000242&hsa-miR-199a-3p&offsets|0|-1,MIMAT0004563&MI0000282&hsa-miR-199b-3p&offsets|0|-1|ACAGTAGTCTGCACATTGGTT	-
-	-	-		NUDT3|11165	MIMAT0004598&MI0000457&hsa-miR-141-5p&offsets|0|-1|CATCTTCCAGTACAGTGTTGG	-		EFNA4|1945	MIMAT0000097&MI0000101&hsa-miR-99a-5p&offsets|0|-3|AACCCGTAGATCCGATCTT	-		TRADD|8717	MIMAT0004586&MI0000438&hsa-miR-15b-3p&offsets|0|-1|CGAATCATTATTTGCTGCTCT	-
-	-	-		SHFM1|7979	MIMAT0000069&MI0000070&hsa-miR-16-5p&offsets|0|0,MIMAT0000069&MI0000115&hsa-miR-16-5p&offsets|0|0|TAGCAGCACGTAAATATTGGCG	-		YIPF2|78992	MIMAT0000254&MI0000267&hsa-miR-10b-5p&offsets|+1|-3|ACCCTGTAGAACCGAATTT	-		KIAA0907|22889	MIMAT0000693&MI0000749&hsa-miR-30e-3p&offsets|0|-3|CTTTCAGTCGGATGTTTAC	-
-	-	-		RUVBL1|8607	MIMAT0002809&MI0003129&hsa-miR-146b-5p&offsets|0|-2|TGAGAACTGAATTCCATAGG	-		WDR46|9277	MIMAT0004552&MI0000261&hsa-miR-139-3p&offsets|0|0|TGGAGACGCGGCCCTGTTGGAGT	-		CCDC12|151903	MIMAT0000088&MI0000088&hsa-miR-30a-3p&offsets|0|-4|CTTTCAGTCGGATGTTTG	-
-	-	-		FAM189B|10712	MIMAT0000090&MI0000090&hsa-miR-32-5p&offsets|0|-2|TATTGCACATTACTAAGTTG	-		IGSF9|57549	MIMAT0000254&MI0000267&hsa-miR-10b-5p&offsets|0|-4|TACCCTGTAGAACCGAATT	-		MYEOV|26579	MIMAT0000689&MI0000746&hsa-miR-99b-5p&offsets|0|+1|CACCCGTAGAACCGACCTTGCGG	-
-	-	-		C9orf30|91283	MIMAT0000076&MI0000077&hsa-miR-21-5p&offsets|0|-7|TAGCTTATCAGACTG	-		STIP1|10963	MIMAT0000254&MI0000267&hsa-miR-10b-5p&offsets|+1|0|ACCCTGTAGAACCGAATTTGTG	-		GBP5|115362	MIMAT0000261&MI0000273&hsa-miR-183-5p&offsets|-2|-3|TGTATGGCACTGGTAGAATTC	-
-	-	-		XIRP1|165904	MIMAT0000432&MI0000457&hsa-miR-141-3p&offsets|0|-1|TAACACTGTCTGGTAAAGATG	-		EN1|2019	MIMAT0000254&MI0000267&hsa-miR-10b-5p&offsets|0|-8|TACCCTGTAGAACCG	-		ATG2A|23130	MIMAT0000440&MI0000465&hsa-miR-191-5p&offsets|+1|0|AACGGAATCCCAAAAGCAGCTG	-
-	-	-		MCM7|4176	MIMAT0000078&MI0000079&hsa-miR-23a-3p&offsets|0|+2|ATCACATTGCCAGGGATTTCCAA	-		PSMB5|5693	MIMAT0000254&MI0000267&hsa-miR-10b-5p&offsets|+1|-2|ACCCTGTAGAACCGAATTTG	-		RFX5|5993	MIMAT0004601&MI0000461&hsa-miR-145-3p&offsets|0|0|GGATTCCTGGAAATACTGTTCT	-
-	-	-		P4HB|5034	MIMAT0000078&MI0000079&hsa-miR-23a-3p&offsets|+1|-2|TCACATTGCCAGGGATTT	-		C1orf35|79169	MIMAT0000254&MI0000267&hsa-miR-10b-5p&offsets|0|-7|TACCCTGTAGAACCGA	-		LGR6|59352	MIMAT0000435&MI0000459&hsa-miR-143-3p&offsets|0|-3|TGAGATGAAGCACTGTAG	-
-	-	-		ALDH18A1|5832	MIMAT0004558&MI0000269&hsa-miR-181a-2-3p&offsets|-1|-2|AACCACTGACCGTTGACTGTA	-		MTX1|4580	MIMAT0000097&MI0000101&hsa-miR-99a-5p&offsets|0|0|AACCCGTAGATCCGATCTTGTG	-		RAB40B|10966	MIMAT0000244&MI0000736&hsa-miR-30c-5p&offsets|0|+1,MIMAT0000244&MI0000254&hsa-miR-30c-5p&offsets|0|+1|TGTAAACATCCTACACTCTCAGCT	-
-	-	-		NACC1|112939	MIMAT0000433&MI0000458&hsa-miR-142-5p&offsets|-2|-2|CCCATAAAGTAGAAAGCACTA	-		HSPE1|3336	MIMAT0000097&MI0000101&hsa-miR-99a-5p&offsets|0|-2|AACCCGTAGATCCGATCTTG	-		OBSCN|84033	MIMAT0000091&MI0000091&hsa-miR-33a-5p&offsets|0|-1|GTGCATTGTAGTTGCATTGC	-
-	-	-		KIF22|3835	MIMAT0005951&MI0006444&hsa-miR-1307-3p&offsets|0|+1|ACTCGGCGTGGCGTCGGTCGTGG	-		ROBLD3|28956	MIMAT0004552&MI0000261&hsa-miR-139-3p&offsets|0|-1|TGGAGACGCGGCCCTGTTGGAG	-		BZRAP1|9256	MIMAT0019208&MI0014181&hsa-miR-3074-5p&offsets|0|0|GTTCCTGCTGAACTGAGCCAG	-
-	-	-		MAGOHB|55110	MIMAT0004945&MI0005559&hsa-miR-744-5p&offsets|0|0|TGCGGGGCTAGGGCTAACAGCA	-		TTLL12|23170	MIMAT0000097&MI0000101&hsa-miR-99a-5p&offsets|+1|-1|ACCCGTAGATCCGATCTTGT	-		TIMM44|10469	MIMAT0000754&MI0000806&hsa-miR-337-3p&offsets|+1|0|TCCTATATGATGCCTTTCTTC	-
-	-	-		PPP4C|5531	MIMAT0000070&MI0000071&hsa-miR-17-5p&offsets|0|-3|CAAAGTGCTTACAGTGCAGG	-		FAM83H|286077	MIMAT0000437&MI0000461&hsa-miR-145-5p&offsets|0|0|GTCCAGTTTTCCCAGGAATCCCT	-		FAM100A|124402	MIMAT0001080&MI0001150&hsa-miR-196b-5p&offsets|0|-2|TAGGTAGTTTCCTGTTGTTG	-
-	-	-		INCENP|3619	MIMAT0000100&MI0000107&hsa-miR-29b-3p&offsets|0|0,MIMAT0000100&MI0000105&hsa-miR-29b-3p&offsets|0|0|TAGCACCATTTGAAATCAGTGTT	-		PWP2|5822	MIMAT0000423&MI0000446&hsa-miR-125b-5p&offsets|0|-2,MIMAT0000423&MI0000470&hsa-miR-125b-5p&offsets|0|-2|TCCCTGAGACCCTAACTTGT	-		EHBP1L1|254102	MI0000809&hsa-mir-151a&coords|8|-|141742721|141742743|CTCGAGGAGCTCACAGTCTAGTA	-
-	-	-		STX6|10228	MIMAT0000257&MI0000270&hsa-miR-181b-5p&offsets|0|0,MIMAT0000257&MI0000683&hsa-miR-181b-5p&offsets|0|0|AACATTCATTGCTGTCGGTGGGT	-		DBNDD1|79007	MIMAT0000097&MI0000101&hsa-miR-99a-5p&offsets|0|-1|AACCCGTAGATCCGATCTTGT	-		FXR2|9513	MIMAT0000414&MI0000433&hsa-let-7g-5p&offsets|-1|0|CTGAGGTAGTAGTTTGTACAGTT	-
-	-	-		FN1|2335	MIMAT0000093&MI0000095&hsa-miR-93-5p&offsets|0|-2|CAAAGTGCTGTTCGTGCAGGT	-		PSMD14|10213	MIMAT0000254&MI0000267&hsa-miR-10b-5p&offsets|0|0|TACCCTGTAGAACCGAATTTGTG	-		NR4A1|3164	MIMAT0000445&MI0000471&hsa-miR-126-3p&offsets|-1|0|CTCGTACCGTGAGTAATAATGCG	-
-	-	-		ARPC5L|81873	MIMAT0000440&MI0000465&hsa-miR-191-5p&offsets|+1|0|AACGGAATCCCAAAAGCAGCTG	-		PPP4C|5531	MIMAT0000254&MI0000267&hsa-miR-10b-5p&offsets|0|-6|TACCCTGTAGAACCGAA	-		C1orf35|79169	MIMAT0002174&MI0002468&hsa-miR-484&offsets|0|0|TCAGGCTCAGTCCCCTCCCGAT	-
-	-	-		SOX11|6664	MIMAT0005792&MI0003776&hsa-miR-320b&offsets|0|-2,MIMAT0005792&MI0003839&hsa-miR-320b&offsets|0|-2,MIMAT0000510&MI0000542&hsa-miR-320a&offsets|0|-2|AAAAGCTGGGTTGAGAGGGC	-		TTYH3|80727	MIMAT0000437&MI0000461&hsa-miR-145-5p&offsets|0|-2|GTCCAGTTTTCCCAGGAATCC	-		C19orf60|55049	MIMAT0000099&MI0000103&hsa-miR-101-3p&offsets|+2|-1,MIMAT0000099&MI0000739&hsa-miR-101-3p&offsets|+2|-1|CAGTACTGTGATAACTGA	-
-	-	-		GEN1|348654	MIMAT0000757&MI0000809&hsa-miR-151a-3p&offsets|0|0|CTAGACTGAAGCTCCTTGAGG	-		HSF1|3297	MIMAT0000064&MI0000064&hsa-let-7c-5p&offsets|0|-1|TGAGGTAGTAGGTTGTATGGT	-		GALK1|2584	MIMAT0004500&MI0000084&hsa-miR-26b-3p&offsets|0|0|CCTGTTCTCCATTACTTGGCTC	-
-	-	-		SCAMP3|10067	MIMAT0000259&MI0000272&hsa-miR-182-5p&offsets|+5|-2|CAATGGTAGAACTCACA	-		CRTC2|200186	MIMAT0000254&MI0000267&hsa-miR-10b-5p&offsets|+1|+1|ACCCTGTAGAACCGAATTTGTGT	-		FAM198A|729085	MIMAT0000064&MI0000064&hsa-let-7c-5p&offsets|0|-3|TGAGGTAGTAGGTTGTATG	-
-	-	-		NUTF2|10204	MIMAT0000456&MI0000483&hsa-miR-186-5p&offsets|0|-2|CAAAGAATTCTCCTTTTGGG	-		C16orf61|56942	MIMAT0004556&MI0000267&hsa-miR-10b-3p&offsets|0|0|ACAGATTCGATTCTAGGGGAAT	-		JPH2|57158	MIMAT0000757&MI0000809&hsa-miR-151a-3p&offsets|0|-3|CTAGACTGAAGCTCCTTG	-
-	-	-		DPP3|10072	MIMAT0000449&MI0000477&hsa-miR-146a-5p&offsets|0|0|TGAGAACTGAATTCCATGGGTT	-		TSEN54|283989	MIMAT0000254&MI0000267&hsa-miR-10b-5p&offsets|+1|-5|ACCCTGTAGAACCGAAT	-		MAP7D1|55700	MIMAT0001635&MI0001733&hsa-miR-452-5p&offsets|+2|+1|CTGTTTGCAGAGGAAACTGAG	-
-	-	-		SRPRB|58477	MIMAT0000101&MI0000108&hsa-miR-103a-3p&offsets|+2|+1,MIMAT0000101&MI0000109&hsa-miR-103a-3p&offsets|+2|+1|CAGCATTGTACAGGGCTATGAA	-		EIF4EBP1|1978	MIMAT0000088&MI0000088&hsa-miR-30a-3p&offsets|+1|+2|TTTCAGTCGGATGTTTGCAGCTG	-		MED22|6837	MIMAT0000437&MI0000461&hsa-miR-145-5p&offsets|0|-2|GTCCAGTTTTCCCAGGAATCC	-
-	-	-		PSMA4|5685	MIMAT0000757&MI0000809&hsa-miR-151a-3p&offsets|-1|-2|ACTAGACTGAAGCTCCTTGA	-		PDAP1|11333	MIMAT0000254&MI0000267&hsa-miR-10b-5p&offsets|-1|-2|ATACCCTGTAGAACCGAATTTG	-		KLC2|64837	MIMAT0000232&MI0000281&hsa-miR-199a-3p&offsets|0|0,MIMAT0000232&MI0000242&hsa-miR-199a-3p&offsets|0|0,MIMAT0004563&MI0000282&hsa-miR-199b-3p&offsets|0|0|ACAGTAGTCTGCACATTGGTTA	-
-	-	-		HMGB2|3148	MIMAT0000433&MI0000458&hsa-miR-142-5p&offsets|-2|-3|CCCATAAAGTAGAAAGCACT	-		TIMELESS|8914	MIMAT0001631&MI0001729&hsa-miR-451a&offsets|+1|0|AACCGTTACCATTACTGAGTT	-		ENO3|2027	MIMAT0004493&MI0000076&hsa-miR-20a-3p&offsets|+1|+1|CTGCATTATGAGCACTTAAAGT	-
-	-	-		TUBA1B|10376	MIMAT0000318&MI0000342&hsa-miR-200b-3p&offsets|0|0|TAATACTGCCTGGTAATGATGA	-		CBS|875	MIMAT0000265&MI0000284&hsa-miR-204-5p&offsets|0|0|TTCCCTTTGTCATCCTATGCCT	-		CIITA|4261	MIMAT0000450&MI0000478&hsa-miR-149-5p&offsets|0|-3|TCTGGCTCCGTGTCTTCACT	-
-	-	-		PFDN6|10471	MIMAT0003885&MI0003820&hsa-miR-454-3p&offsets|0|0|TAGTGCAATATTGCTTATAGGGT	-		NFKBIB|4793	MIMAT0000710&MI0000767&hsa-miR-365a-3p&offsets|0|-2,MIMAT0022834&MI0000769&hsa-miR-365b-3p&offsets|0|-2|TAATGCCCCTAAAAATCCTT	-		STK11|6794	MIMAT0004515&MI0000107&hsa-miR-29b-2-5p&offsets|0|0|CTGGTTTCACATGGTGGCTTAG	-
-	-	-		C11orf84|144097	MIMAT0002821&MI0003139&hsa-miR-181d-5p&offsets|0|-2|AACATTCATTGTTGTCGGTGG	-		SRD5A1|6715	MIMAT0000423&MI0000446&hsa-miR-125b-5p&offsets|0|-1,MIMAT0000423&MI0000470&hsa-miR-125b-5p&offsets|0|-1|TCCCTGAGACCCTAACTTGTG	-		LTBP4|8425	MIMAT0000253&MI0000266&hsa-miR-10a-5p&offsets|+1|-4|ACCCTGTAGATCCGAATT	-
-	-	-		CDK16|5127	MIMAT0003888&MI0003836&hsa-miR-766-3p&offsets|0|0|ACTCCAGCCCCACAGCCTCAGC	-		ATAD3B|83858	MIMAT0000254&MI0000267&hsa-miR-10b-5p&offsets|+1|-7|ACCCTGTAGAACCGA	-		TYK2|7297	MIMAT0000728&MI0000783&hsa-miR-375&offsets|-1|-1|TTTTGTTCGTTCGGCTCGCGTG	-
-	-	-		DNMT3A|1788	MIMAT0000075&MI0000076&hsa-miR-20a-5p&offsets|0|-2|TAAAGTGCTTATAGTGCAGGT	-		PSMG3|84262	MIMAT0000254&MI0000267&hsa-miR-10b-5p&offsets|+2|-2|CCCTGTAGAACCGAATTTG	-		TRIP10|9322	MIMAT0000067&MI0000067&hsa-let-7f-5p&offsets|0|-4,MIMAT0000067&MI0000068&hsa-let-7f-5p&offsets|0|-4|TGAGGTAGTAGATTGTAT	-
-	-	-		SH3BP1|23616	MIMAT0000692&MI0000749&hsa-miR-30e-5p&offsets|+1|0|GTAAACATCCTTGACTGGAAG	-		C6orf153|88745	MIMAT0002817&MI0003135&hsa-miR-495-3p&offsets|0|0|AAACAAACATGGTGCACTTCTT	-		FABP7|2173	MIMAT0004946&MI0005559&hsa-miR-744-3p&offsets|0|-1|CTGTTGCCACTAACCTCAACC	-
-	-	-		TFG|10342	MIMAT0000256&MI0000289&hsa-miR-181a-5p&offsets|0|-5,MIMAT0000256&MI0000269&hsa-miR-181a-5p&offsets|0|-5|AACATTCAACGCTGTCGG	-		MEMO1|51072	MIMAT0000756&MI0000808&hsa-miR-326&offsets|0|+1|CCTCTGGGCCCTTCCTCCAGC	-		ACADS|35	MIMAT0000692&MI0000749&hsa-miR-30e-5p&offsets|+1|-2|GTAAACATCCTTGACTGGA	-
-	-	-		TMSB10|9168	MIMAT0000065&MI0000065&hsa-let-7d-5p&offsets|0|-1|AGAGGTAGTAGGTTGCATAGT	-		GTPBP3|84705	MIMAT0000064&MI0000064&hsa-let-7c-5p&offsets|0|-2|TGAGGTAGTAGGTTGTATGG	-		RGS16|6004	MIMAT0000266&MI0000285&hsa-miR-205-5p&offsets|0|-3|TCCTTCATTCCACCGGAGT	-
-	-	-		C1orf59|113802	MIMAT0000068&MI0000069&hsa-miR-15a-5p&offsets|0|+2|TAGCAGCACATAATGGTTTGTGGA	-		TYMP|1890	MIMAT0001631&MI0001729&hsa-miR-451a&offsets|+1|-1|AACCGTTACCATTACTGAGT	-		KIFC2|90990	MIMAT0000076&MI0000077&hsa-miR-21-5p&offsets|+4|0|TTATCAGACTGATGTTGA	-
-	-	-		PLOD1|5351	MIMAT0000096&MI0000100&hsa-miR-98-5p&offsets|0|+1|TGAGGTAGTAAGTTGTATTGTTG	-		RPS19BP1|91582	MIMAT0000064&MI0000064&hsa-let-7c-5p&offsets|0|-3|TGAGGTAGTAGGTTGTATG	-		GADD45B|4616	MIMAT0004797&MI0003589&hsa-miR-582-3p&offsets|0|0|TAACTGGTTGAACAACTGAACC	-
-	-	-		A2ML1|144568	MIMAT0015378&MI0014228&hsa-miR-3065-3p&offsets|0|-1|TCAGCACCAGGATATTGTTGGA	-		NDUFB9|4715	MIMAT0000254&MI0000267&hsa-miR-10b-5p&offsets|+3|-1|CCTGTAGAACCGAATTTGT	-		DCAF15|90379	MIMAT0000088&MI0000088&hsa-miR-30a-3p&offsets|0|-1|CTTTCAGTCGGATGTTTGCAG	-
-	-	-		EBP|10682	MIMAT0001341&MI0001446&hsa-miR-424-5p&offsets|0|0|CAGCAGCAATTCATGTTTTGAA	-		NCLN|56926	MIMAT0003163&MI0003514&hsa-miR-539-5p&offsets|0|0|GGAGAAATTATCCTTGGTGTGT	-		MLL4|9757	MIMAT0000266&MI0000285&hsa-miR-205-5p&offsets|0|-2|TCCTTCATTCCACCGGAGTC	-
-	-	-		LSM2|57819	MIMAT0004774&MI0003185&hsa-miR-501-3p&offsets|0|+1|AATGCACCCGGGCAAGGATTCTG	-		FAM89B|23625	MIMAT0002177&MI0002470&hsa-miR-486-5p&offsets|0|-2,MI0023622&hsa-mir-486-2&coords|8|+|41517962|41517981|TCCTGTACTGAGCTGCCCCG	-		C9orf142|286257	MIMAT0000259&MI0000272&hsa-miR-182-5p&offsets|0|-4|TTTGGCAATGGTAGAACTCA	-
-	-	-		TMEM63B|55362	MIMAT0000243&MI0000253&hsa-miR-148a-3p&offsets|0|-1|TCAGTGCACTACAGAACTTTG	-		SHFM1|7979	MIMAT0002177&MI0002470&hsa-miR-486-5p&offsets|0|0,MI0023622&hsa-mir-486-2&coords|8|+|41517962|41517983|TCCTGTACTGAGCTGCCCCGAG	-		ARHGEF18|23370	MIMAT0000440&MI0000465&hsa-miR-191-5p&offsets|0|-2|CAACGGAATCCCAAAAGCAGC	-
-	-	-		EIF4EBP1|1978	MIMAT0003241&MI0003583&hsa-miR-576-5p&offsets|0|+1|ATTCTAATTTCTCCACGTCTTTG	-		C6orf115|58527	MIMAT0000765&MI0000816&hsa-miR-335-5p&offsets|0|-1|TCAAGAGCAATAACGAAAAATG	-		PTGES2|80142	MIMAT0003886&MI0003834&hsa-miR-769-5p&offsets|-1|-1|CTGAGACCTCTGGGTTCTGAGC	-
-	-	-		MOGS|7841	MIMAT0003393&MI0001448&hsa-miR-425-5p&offsets|0|-1|AATGACACGATCACTCCCGTTG	-		FAM189B|10712	MIMAT0000754&MI0000806&hsa-miR-337-3p&offsets|+1|0|TCCTATATGATGCCTTTCTTC	-		FBXO44|93611	MIMAT0000254&MI0000267&hsa-miR-10b-5p&offsets|+1|-7|ACCCTGTAGAACCGA	-
-	-	-		FANCD2|2177	MIMAT0000433&MI0000458&hsa-miR-142-5p&offsets|-2|-1|CCCATAAAGTAGAAAGCACTAC	-		C19orf28|126321	MIMAT0000097&MI0000101&hsa-miR-99a-5p&offsets|0|-4|AACCCGTAGATCCGATCT	-		IKBKG|8517	MIMAT0000443&MI0000469&hsa-miR-125a-5p&offsets|0|-2|TCCCTGAGACCCTTTAACCTGT	-
-	-	-		FOXK2|3607	MIMAT0000692&MI0000749&hsa-miR-30e-5p&offsets|+1|-1|GTAAACATCCTTGACTGGAA	-		BANF1|8815	MIMAT0000254&MI0000267&hsa-miR-10b-5p&offsets|0|+1|TACCCTGTAGAACCGAATTTGTGT	-		ANO8|57719	MIMAT0022721&MI0006382&hsa-miR-1247-3p&offsets|+3|0|CGGGAACGTCGAGACTGGAGC	-
-	-	-		BAX|581	MIMAT0000759&MI0000811&hsa-miR-148b-3p&offsets|0|-2|TCAGTGCATCACAGAACTTT	-		FUS|2521	MIMAT0000754&MI0000806&hsa-miR-337-3p&offsets|+1|-1|TCCTATATGATGCCTTTCTT	-		SCAMP5|192683	MIMAT0004680&MI0000748&hsa-miR-130b-5p&offsets|0|+1|ACTCTTTCCCTGTTGCACTACT	-
-	-	-		GTPBP4|23560	MI0000077&hsa-mir-21&coords|17|+|57918614|57918633|GGCTGTACCACCTTGTCGGG	-		GATAD2A|54815	MIMAT0000064&MI0000064&hsa-let-7c-5p&offsets|+1|0|GAGGTAGTAGGTTGTATGGTT	-		EZH1|2145	MIMAT0001638&MI0001735&hsa-miR-409-5p&offsets|0|-2|AGGTTACCCGAGCAACTTTGC	-
-	-	-		BAIAP2L1|55971	MIMAT0000424&MI0000447&hsa-miR-128-3p&offsets|0|+1|TCACAGTGAACCGGTCTCTTTT	-		DPM3|54344	MIMAT0002820&MI0003138&hsa-miR-497-5p&offsets|0|0|CAGCAGCACACTGTGGTTTGT	-		MTG1|92170	MIMAT0000069&MI0000070&hsa-miR-16-5p&offsets|0|+1,MIMAT0000069&MI0000115&hsa-miR-16-5p&offsets|0|+1|TAGCAGCACGTAAATATTGGCGT	-
-	-	-		AP1S1|1174	MIMAT0000617&MI0000650&hsa-miR-200c-3p&offsets|0|-2|TAATACTGCCGGGTAATGATG	-		TSPO|706	MIMAT0001631&MI0001729&hsa-miR-451a&offsets|+1|-2|AACCGTTACCATTACTGAG	-		GIPC1|10755	MIMAT0004797&MI0003589&hsa-miR-582-3p&offsets|0|+1|TAACTGGTTGAACAACTGAACCC	-
-	-	-		MAGOH|4116	MIMAT0000757&MI0000809&hsa-miR-151a-3p&offsets|+1|0|TAGACTGAAGCTCCTTGAGG	-		KIAA1199|57214	MIMAT0000254&MI0000267&hsa-miR-10b-5p&offsets|+4|0|CTGTAGAACCGAATTTGTG	-		NFKBIL1|4795	MIMAT0000757&MI0000809&hsa-miR-151a-3p&offsets|0|-2|CTAGACTGAAGCTCCTTGA	-
-	-	-		GBAP1|2630	MIMAT0000318&MI0000342&hsa-miR-200b-3p&offsets|0|-1|TAATACTGCCTGGTAATGATG	-		AP1S1|1174	MIMAT0000461&MI0000489&hsa-miR-195-5p&offsets|0|-1|TAGCAGCACAGAAATATTGG	-		SLC25A25|114789	MIMAT0000087&MI0000088&hsa-miR-30a-5p&offsets|+1|-1|GTAAACATCCTCGACTGGAA	-
-	-	-		PMM2|5373	MIMAT0000080&MI0000081&hsa-miR-24-3p&offsets|0|-1,MIMAT0000080&MI0000080&hsa-miR-24-3p&offsets|0|-1|TGGCTCAGTTCAGCAGGAACA	-		LSM2|57819	MIMAT0004556&MI0000267&hsa-miR-10b-3p&offsets|+1|0|CAGATTCGATTCTAGGGGAAT	-		JMJD7-PLA2G4B|8681	MIMAT0000243&MI0000253&hsa-miR-148a-3p&offsets|-1|0|GTCAGTGCACTACAGAACTTTGT	-
-	-	-		HOMER3|9454	MIMAT0000069&MI0000070&hsa-miR-16-5p&offsets|+5|+1,MIMAT0000069&MI0000115&hsa-miR-16-5p&offsets|+5|+1|GCACGTAAATATTGGCGT	-		PSMD2|5708	MIMAT0002177&MI0002470&hsa-miR-486-5p&offsets|0|-1,MI0023622&hsa-mir-486-2&coords|8|+|41517962|41517982|TCCTGTACTGAGCTGCCCCGA	-		FERMT3|83706	MIMAT0004502&MI0000086&hsa-miR-28-3p&offsets|0|-2|CACTAGATTGTGAGCTCCTG	-
-	-	-		TTC13|79573	MIMAT0000617&MI0000650&hsa-miR-200c-3p&offsets|0|-1|TAATACTGCCGGGTAATGATGG	-		PGAM5|192111	MIMAT0022721&MI0006382&hsa-miR-1247-3p&offsets|+3|0|CGGGAACGTCGAGACTGGAGC	-		SASH3|54440	MIMAT0000456&MI0000483&hsa-miR-186-5p&offsets|0|+1|CAAAGAATTCTCCTTTTGGGCTT	-
-	-	-		SLC2A1|6513	MIMAT0000692&MI0000749&hsa-miR-30e-5p&offsets|+1|+2|GTAAACATCCTTGACTGGAAGCT	-		SMARCB1|6598	MIMAT0000064&MI0000064&hsa-let-7c-5p&offsets|0|0|TGAGGTAGTAGGTTGTATGGTT	-		DSG3|1830	MIMAT0000456&MI0000483&hsa-miR-186-5p&offsets|0|-1|CAAAGAATTCTCCTTTTGGGC	-
-	-	-		PSMG1|8624	MIMAT0000760&MI0000812&hsa-miR-331-3p&offsets|0|-1|GCCCCTGGGCCTATCCTAGA	-		DDX49|54555	MIMAT0000754&MI0000806&hsa-miR-337-3p&offsets|0|-1|CTCCTATATGATGCCTTTCTT	-		ADRM1|11047	MIMAT0000259&MI0000272&hsa-miR-182-5p&offsets|0|-2|TTTGGCAATGGTAGAACTCACA	-
-	-	-		EXOSC4|54512	MIMAT0000080&MI0000081&hsa-miR-24-3p&offsets|0|0,MIMAT0000080&MI0000080&hsa-miR-24-3p&offsets|0|0|TGGCTCAGTTCAGCAGGAACAG	-		METTL11A|28989	MIMAT0000423&MI0000446&hsa-miR-125b-5p&offsets|0|0,MIMAT0000423&MI0000470&hsa-miR-125b-5p&offsets|0|0|TCCCTGAGACCCTAACTTGTGA	-		JAG2|3714	MIMAT0001341&MI0001446&hsa-miR-424-5p&offsets|0|-2|CAGCAGCAATTCATGTTTTG	-
-	-	-		RTKN|6242	MIMAT0004484&MI0000065&hsa-let-7d-3p&offsets|+1|0|TATACGACCTGCTGCCTTTCT	-		TCF3|6929	MIMAT0000443&MI0000469&hsa-miR-125a-5p&offsets|0|-4|TCCCTGAGACCCTTTAACCT	-		DPH1|1801	MIMAT0000688&MI0000745&hsa-miR-301a-3p&offsets|0|0|CAGTGCAATAGTATTGTCAAAGC	-
-	-	-		ISG15|9636	MIMAT0004776&MI0003190&hsa-miR-505-5p&offsets|0|+1|GGGAGCCAGGAAGTATTGATGTT	-		C1orf122|127687	MIMAT0000263&MI0000282&hsa-miR-199b-5p&offsets|0|-2|CCCAGTGTTTAGACTATCTGT	-		CHST2|9435	MIMAT0000243&MI0000253&hsa-miR-148a-3p&offsets|0|-2|TCAGTGCACTACAGAACTTT	-
-	-	-		NUP62|23636	MIMAT0004678&MI0000746&hsa-miR-99b-3p&offsets|0|-1|CAAGCTCGTGTCTGTGGGTCC	-		MRPS34|65993	MIMAT0000423&MI0000446&hsa-miR-125b-5p&offsets|0|-3,MIMAT0000423&MI0000470&hsa-miR-125b-5p&offsets|0|-3|TCCCTGAGACCCTAACTTG	-		C19orf6|91304	MIMAT0000440&MI0000465&hsa-miR-191-5p&offsets|0|-1|CAACGGAATCCCAAAAGCAGCT	-
-	-	-		IFI30|10437	MIMAT0000259&MI0000272&hsa-miR-182-5p&offsets|0|-5|TTTGGCAATGGTAGAACTC	-		LRRC59|55379	MIMAT0000064&MI0000064&hsa-let-7c-5p&offsets|-1|-2|TTGAGGTAGTAGGTTGTATGG	-		CCNL2|81669	MIMAT0000261&MI0000273&hsa-miR-183-5p&offsets|0|-2|TATGGCACTGGTAGAATTCA	-
-	-	-		SEC13|6396	MIMAT0004549&MI0000253&hsa-miR-148a-5p&offsets|0|-2|AAAGTTCTGAGACACTCCGA	-		NUDT5|11164	MIMAT0004814&MI0003676&hsa-miR-654-3p&offsets|0|-1|TATGTCTGCTGACCATCACCT	-		KLK10|5655	MIMAT0000261&MI0000273&hsa-miR-183-5p&offsets|-2|-2|TGTATGGCACTGGTAGAATTCA	-
-	-	-		CHAF1A|10036	MIMAT0000689&MI0000746&hsa-miR-99b-5p&offsets|0|0|CACCCGTAGAACCGACCTTGCG	-		KCTD5|54442	MIMAT0000445&MI0000471&hsa-miR-126-3p&offsets|+1|-1|CGTACCGTGAGTAATAATGC	-		TCAP|8557	MIMAT0000461&MI0000489&hsa-miR-195-5p&offsets|0|-2|TAGCAGCACAGAAATATTG	-
-	-	-		HDAC2|3066	MIMAT0004558&MI0000269&hsa-miR-181a-2-3p&offsets|0|-2|ACCACTGACCGTTGACTGTA	-		FBXL19|54620	MIMAT0000461&MI0000489&hsa-miR-195-5p&offsets|0|+1|TAGCAGCACAGAAATATTGGCA	-		LRRC14|9684	MIMAT0000253&MI0000266&hsa-miR-10a-5p&offsets|+1|-7|ACCCTGTAGATCCGA	-
-	-	-		DNAJC2|27000	MIMAT0002871&MI0003184&hsa-miR-500a-3p&offsets|0|+1|ATGCACCTGGGCAAGGATTCTGA	-		CLPP|8192	MIMAT0000446&MI0000472&hsa-miR-127-3p&offsets|0|-3|TCGGATCCGTCTGAGCTTG	-		DIRAS1|148252	MIMAT0000760&MI0000812&hsa-miR-331-3p&offsets|0|0|GCCCCTGGGCCTATCCTAGAA	-
-	-	-		TRIM11|81559	MIMAT0004797&MI0003589&hsa-miR-582-3p&offsets|0|-1|TAACTGGTTGAACAACTGAAC	-		BRMS1|25855	MIMAT0000461&MI0000489&hsa-miR-195-5p&offsets|0|0|TAGCAGCACAGAAATATTGGC	-		BTNL9|153579	MIMAT0004564&MI0000290&hsa-miR-214-5p&offsets|+1|0|GCCTGTCTACACTTGCTGTGC	-
-	-	-		GTF3C6|112495	MIMAT0000062&MI0000062&hsa-let-7a-5p&offsets|-1|0|GTGAGGTAGTAGGTTGTATAGTT	-		MMP1|4312	MIMAT0000253&MI0000266&hsa-miR-10a-5p&offsets|+4|-1|CTGTAGATCCGAATTTGT	-		QSOX2|169714	-	-
-	-	-		UBAP2L|9898	MIMAT0000449&MI0000477&hsa-miR-146a-5p&offsets|0|+1|TGAGAACTGAATTCCATGGGTTG	-		NUDT3|11165	MIMAT0002817&MI0003135&hsa-miR-495-3p&offsets|0|+1|AAACAAACATGGTGCACTTCTTT	-		MMP7|4316	-	-
-	-	-		COPA|1314	MIMAT0000270&MI0000289&hsa-miR-181a-3p&offsets|0|-3|ACCATCGACCGTTGATTGT	-		RPUSD3|285367	MIMAT0000263&MI0000282&hsa-miR-199b-5p&offsets|0|-1|CCCAGTGTTTAGACTATCTGTT	-		ABCC10|89845	-	-
-	-	-		APH1A|51107	MIMAT0002813&MI0003132&hsa-miR-493-5p&offsets|0|0|TTGTACATGGTAGGCTTTCATT	-		RAVER1|125950	MIMAT0000097&MI0000101&hsa-miR-99a-5p&offsets|+1|0|ACCCGTAGATCCGATCTTGTG	-		TWF2|11344	-	-
-	-	-		CARM1|10498	MI0000469&hsa-mir-125a&coords|19|+|52196500|52196520|ACCATGTTGCCAGTCTCTAGG	-		MCM4|4173	MIMAT0000452&MI0000480&hsa-miR-154-5p&offsets|0|0|TAGGTTATCCGTGTTGCCTTCG	-		IER5L|389792	-	-
-	-	-		INTS8|55656	MIMAT0002809&MI0003129&hsa-miR-146b-5p&offsets|0|0|TGAGAACTGAATTCCATAGGCT	-		ATP5J2|9551	MIMAT0000253&MI0000266&hsa-miR-10a-5p&offsets|+1|-3|ACCCTGTAGATCCGAATTT	-		H1FX|8971	-	-
-	-	-		ATP5J2|9551	MI0000469&hsa-mir-125a&coords|19|+|52196504|52196520|TGTTGCCAGTCTCTAGG	-		LLGL2|3993	MIMAT0000446&MI0000472&hsa-miR-127-3p&offsets|0|-2|TCGGATCCGTCTGAGCTTGG	-		TRPM2|7226	-	-
-	-	-		SERPINH1|871	MIMAT0002876&MI0003190&hsa-miR-505-3p&offsets|0|+2|CGTCAACACTTGCTGGTTTCCTCT	-		ASPSCR1|79058	MIMAT0000445&MI0000471&hsa-miR-126-3p&offsets|0|-5|TCGTACCGTGAGTAATA	-		PRIC285|85441	-	-
-	-	-		RANGAP1|5905	MIMAT0000243&MI0000253&hsa-miR-148a-3p&offsets|0|+2|TCAGTGCACTACAGAACTTTGTCT	-		TMEM161A|54929	MIMAT0000445&MI0000471&hsa-miR-126-3p&offsets|+1|0|CGTACCGTGAGTAATAATGCG	-		PLEKHG5|57449	-	-
-	-	-		MCM5|4174	MIMAT0004682&MI0000760&hsa-miR-361-3p&offsets|0|+1|TCCCCCAGGTGTGATTCTGATTTG	-		CDK2AP1|8099	MIMAT0000266&MI0000285&hsa-miR-205-5p&offsets|0|-5|TCCTTCATTCCACCGGA	-		SLC6A9|6536	-	-
-	-	-		PPP1CA|5499	MIMAT0004559&MI0000271&hsa-miR-181c-3p&offsets|+1|-1|ACCATCGACCGTTGAGTGGA	-		RFC2|5982	MIMAT0000253&MI0000266&hsa-miR-10a-5p&offsets|0|-7|TACCCTGTAGATCCGA	-		C12orf44|60673	-	-
-	-	-		C6orf125|84300	MIMAT0022726&MI0006443&hsa-miR-1306-5p&offsets|0|-1|CCACCTCCCCTGCAAACGTCC	-		RCC2|55920	MIMAT0000447&MI0000474&hsa-miR-134-5p&offsets|0|0|TGTGACTGGTTGACCAGAGGGG	-		STK25|10494	-	-
-	-	-		TSEN15|116461	MIMAT0000270&MI0000289&hsa-miR-181a-3p&offsets|0|-1|ACCATCGACCGTTGATTGTAC	-		RAE1|8480	MIMAT0000088&MI0000088&hsa-miR-30a-3p&offsets|0|-3|CTTTCAGTCGGATGTTTGC	-		FAM193B|54540	-	-
-	-	-		DTYMK|1841	MIMAT0019208&MI0014181&hsa-miR-3074-5p&offsets|0|0|GTTCCTGCTGAACTGAGCCAG	-		POLR2H|5437	MIMAT0000263&MI0000282&hsa-miR-199b-5p&offsets|0|0|CCCAGTGTTTAGACTATCTGTTC	-		ABCA7|10347	-	-
-	-	-		PVR|5817	MIMAT0002888&MI0003205&hsa-miR-532-5p&offsets|+1|0|ATGCCTTGAGTGTAGGACCGT	-		TSEN34|79042	MIMAT0000098&MI0000102&hsa-miR-100-5p&offsets|+1|0|ACCCGTAGATCCGAACTTGTG	-		RNH1|6050	-	-
-	-	-		APOO|79135	MIMAT0002809&MI0003129&hsa-miR-146b-5p&offsets|0|-1|TGAGAACTGAATTCCATAGGC	-		GAPDH|2597	MIMAT0000733&MI0000787&hsa-miR-379-5p&offsets|0|-3|TGGTAGACTATGGAACGT	-		TRAF5|7188	-	-
-	-	-		HIST1H2BK|85236	MIMAT0000101&MI0000108&hsa-miR-103a-3p&offsets|+4|0,MIMAT0000101&MI0000109&hsa-miR-103a-3p&offsets|+4|0|GCATTGTACAGGGCTATGA	-		CTSD|1509	MIMAT0004601&MI0000461&hsa-miR-145-3p&offsets|0|0|GGATTCCTGGAAATACTGTTCT	-		ADCY4|196883	-	-
-	-	-		FAM58A|92002	MIMAT0000227&MI0000239&hsa-miR-197-3p&offsets|0|-2|TTCACCACCTTCTCCACCCA	-		C20orf27|54976	MIMAT0000253&MI0000266&hsa-miR-10a-5p&offsets|+1|-4|ACCCTGTAGATCCGAATT	-		SCO2|9997	-	-
-	-	-		DBNDD1|79007	MIMAT0004693&MI0000803&hsa-miR-330-5p&offsets|0|-1|TCTCTGGGCCTGTGTCTTAGG	-		RAC3|5881	MI0000459&hsa-mir-143&coords|5|+|148808540|148808562|CTGAGATGAAGCACTGTAGCTCA	-		NICN1|84276	-	-
-	-	-		TBCB|1155	MIMAT0000068&MI0000069&hsa-miR-15a-5p&offsets|0|+1|TAGCAGCACATAATGGTTTGTGG	-		IER5L|389792	MIMAT0026472&MI0000064&hsa-let-7c-3p&offsets|0|0|CTGTACAACCTTCTAGCTTTCC	-		COL27A1|85301	-	-
-	-	-		YWHAZ|7534	MIMAT0000093&MI0000095&hsa-miR-93-5p&offsets|+3|0|AGTGCTGTTCGTGCAGGTAG	-		CHPF|79586	MIMAT0000733&MI0000787&hsa-miR-379-5p&offsets|0|-1|TGGTAGACTATGGAACGTAG	-		FBLN2|2199	-	-
-	-	-		CKAP4|10970	MIMAT0000078&MI0000079&hsa-miR-23a-3p&offsets|+1|+3|TCACATTGCCAGGGATTTCCAAC	-		GPSM2|29899	MIMAT0004603&MI0000470&hsa-miR-125b-2-3p&offsets|+2|+1|ACAAGTCAGGCTCTTGGGACC	-		SURF6|6838	-	-
-	-	-		DCUN1D5|84259	MIMAT0004808&MI0003639&hsa-miR-625-3p&offsets|0|-2|GACTATAGAACTTTCCCCCT	-		PUF60|22827	MIMAT0000445&MI0000471&hsa-miR-126-3p&offsets|0|-1|TCGTACCGTGAGTAATAATGC	-		TMEM120B|144404	-	-
-	-	-		DAZAP1|26528	MIMAT0000440&MI0000465&hsa-miR-191-5p&offsets|+1|-1|AACGGAATCCCAAAAGCAGCT	-		MCM3|4172	MIMAT0004603&MI0000470&hsa-miR-125b-2-3p&offsets|+2|+2|ACAAGTCAGGCTCTTGGGACCT	-		MEGF6|1953	-	-
-	-	-		TMEM8A|58986	MIMAT0000689&MI0000746&hsa-miR-99b-5p&offsets|+2|0|CCCGTAGAACCGACCTTGCG	-		DSN1|79980	MIMAT0000266&MI0000285&hsa-miR-205-5p&offsets|0|-1|TCCTTCATTCCACCGGAGTCT	-		PTK2B|2185	-	-
-	-	-		PSMG3|84262	MIMAT0000067&MI0000067&hsa-let-7f-5p&offsets|+3|0,MIMAT0000067&MI0000068&hsa-let-7f-5p&offsets|+3|0|GGTAGTAGATTGTATAGTT	-		MRPL13|28998	MIMAT0000765&MI0000816&hsa-miR-335-5p&offsets|0|-2|TCAAGAGCAATAACGAAAAAT	-		RANBP3|8498	-	-
-	-	-		C12orf32|83695	MIMAT0003888&MI0003836&hsa-miR-766-3p&offsets|0|-1|ACTCCAGCCCCACAGCCTCAG	-		NDUFA11|126328	MIMAT0002820&MI0003138&hsa-miR-497-5p&offsets|0|+1|CAGCAGCACACTGTGGTTTGTA	-		IL16|3603	-	-
-	-	-		MRPL12|6182	MIMAT0004799&MI0003599&hsa-miR-589-5p&offsets|0|0|TGAGAACCACGTCTGCTCTGAG	-		SCO2|9997	MIMAT0000253&MI0000266&hsa-miR-10a-5p&offsets|0|-3|TACCCTGTAGATCCGAATTT	-		SPI1|6688	-	-
-	-	-		SLC6A9|6536	MIMAT0019208&MI0014181&hsa-miR-3074-5p&offsets|0|+1|GTTCCTGCTGAACTGAGCCAGT	-		ZC3H3|23144	MIMAT0000765&MI0000816&hsa-miR-335-5p&offsets|0|0|TCAAGAGCAATAACGAAAAATGT	-		MBOAT1|154141	-	-
-	-	-		ARPC5|10092	MIMAT0000259&MI0000272&hsa-miR-182-5p&offsets|0|-4|TTTGGCAATGGTAGAACTCA	-		GPS1|2873	MIMAT0000447&MI0000474&hsa-miR-134-5p&offsets|0|-1|TGTGACTGGTTGACCAGAGGG	-		RPS9|6203	-	-
-	-	-		RAVER1|125950	MIMAT0004484&MI0000065&hsa-let-7d-3p&offsets|+1|-1|TATACGACCTGCTGCCTTTC	-		NOP2|4839	MIMAT0000088&MI0000088&hsa-miR-30a-3p&offsets|0|-1|CTTTCAGTCGGATGTTTGCAG	-		SIK1|150094	-	-
-	-	-		SLC12A8|84561	MIMAT0000093&MI0000095&hsa-miR-93-5p&offsets|0|-4|CAAAGTGCTGTTCGTGCAG	-		C1orf106|55765	MIMAT0000098&MI0000102&hsa-miR-100-5p&offsets|+1|-1|ACCCGTAGATCCGAACTTGT	-		-	-	-
-	-	-		TAGLN2|8407	MIMAT0000270&MI0000289&hsa-miR-181a-3p&offsets|0|0|ACCATCGACCGTTGATTGTACC	-		C1orf59|113802	MIMAT0000064&MI0000064&hsa-let-7c-5p&offsets|-1|-1|TTGAGGTAGTAGGTTGTATGGT	-		Downregulated	-	-
-	-	-		HSPA14|51182	MIMAT0000104&MI0000114&hsa-miR-107&offsets|0|-2,MIMAT0000101&MI0000108&hsa-miR-103a-3p&offsets|0|-2,MIMAT0000101&MI0000109&hsa-miR-103a-3p&offsets|0|-2|AGCAGCATTGTACAGGGCTAT	-		TRIM65|201292	MIMAT0000446&MI0000472&hsa-miR-127-3p&offsets|0|-1|TCGGATCCGTCTGAGCTTGGC	-		LOC90784|90784	-	-
-	-	-		TCF3|6929	MIMAT0000443&MI0000469&hsa-miR-125a-5p&offsets|0|0|TCCCTGAGACCCTTTAACCTGTGA	-		LOC388152|388152	MIMAT0000720&MI0000776&hsa-miR-376c-3p&offsets|0|0|AACATAGAGGAAATTCCACGT	-		RBPJ|3516	-	-
-	-	-		SEC61A1|29927	MIMAT0000692&MI0000749&hsa-miR-30e-5p&offsets|+1|+1|GTAAACATCCTTGACTGGAAGC	-		SMARCA4|6597	MIMAT0004601&MI0000461&hsa-miR-145-3p&offsets|+2|+1|ATTCCTGGAAATACTGTTCTT	-		C14orf167|55449	-	-
-	-	-		PSMA7|5688	MIMAT0004503&MI0000087&hsa-miR-29a-5p&offsets|0|0|ACTGATTTCTTTTGGTGTTCAG	-		NFKBIE|4794	MIMAT0000731&MI0000786&hsa-miR-378a-5p&offsets|0|0|CTCCTGACTCCAGGTCCTGTGT	-		-	-	-
-	-	-		PODXL2|50512	MIMAT0004688&MI0000782&hsa-miR-374a-3p&offsets|0|0|CTTATCAGATTGTATTGTAATT	-		PTMA|5757	MIMAT0000263&MI0000282&hsa-miR-199b-5p&offsets|0|-3|CCCAGTGTTTAGACTATCTG	-		-	-	-
-	-	-		C12orf11|55726	MIMAT0000084&MI0000085&hsa-miR-27a-3p&offsets|0|-2|TTCACAGTGGCTAAGTTCC	-		CLIC1|1192	MIMAT0000253&MI0000266&hsa-miR-10a-5p&offsets|+2|-1|CCCTGTAGATCCGAATTTGT	-		-	-	-
-	-	-		KIF1A|547	MIMAT0002888&MI0003205&hsa-miR-532-5p&offsets|0|0|CATGCCTTGAGTGTAGGACCGT	-		TMEM63B|55362	MIMAT0000446&MI0000472&hsa-miR-127-3p&offsets|0|0|TCGGATCCGTCTGAGCTTGGCT	-		-	-	-
-	-	-		FBXL19|54620	MIMAT0003283&MI0003628&hsa-miR-615-3p&offsets|0|-1|TCCGAGCCTGGGTCTCCCTCT	-		EIF5A|1984	MIMAT0000266&MI0000285&hsa-miR-205-5p&offsets|0|-4|TCCTTCATTCCACCGGAG	-		-	-	-
-	-	-		WDR77|79084	MIMAT0004502&MI0000086&hsa-miR-28-3p&offsets|+1|+1|ACTAGATTGTGAGCTCCTGGAG	-		TALDO1|6888	MIMAT0000253&MI0000266&hsa-miR-10a-5p&offsets|+1|-1|ACCCTGTAGATCCGAATTTGT	-		-	-	-
-	-	-		DAP3|7818	MIMAT0000086&MI0000087&hsa-miR-29a-3p&offsets|-1|0|CTAGCACCATCTGAAATCGGTTA	-		MPV17L2|84769	MIMAT0000733&MI0000787&hsa-miR-379-5p&offsets|0|0|TGGTAGACTATGGAACGTAGG	-		-	-	-
-	-	-		IRAK1|3654	MIMAT0000757&MI0000809&hsa-miR-151a-3p&offsets|-2|-3|TACTAGACTGAAGCTCCTTG	-		C11orf84|144097	MIMAT0000444&MI0000471&hsa-miR-126-5p&offsets|0|+1|CATTATTACTTTTGGTACGCGC	-		-	-	-
-	-	-		MIF|4282	MIMAT0000068&MI0000069&hsa-miR-15a-5p&offsets|0|-1|TAGCAGCACATAATGGTTTGT	-		SCRIB|23513	MIMAT0000253&MI0000266&hsa-miR-10a-5p&offsets|0|-5|TACCCTGTAGATCCGAAT	-		-	-	-
-	-	-		SLAMF8|56833	MIMAT0004810&MI0003643&hsa-miR-629-5p&offsets|0|+1|TGGGTTTACGTTGGGAGAACTT	-		TRABD|80305	MIMAT0000088&MI0000088&hsa-miR-30a-3p&offsets|0|-4|CTTTCAGTCGGATGTTTG	-		-	-	-
-	-	-		SRC|6714	MIMAT0004553&MI0000263&hsa-miR-7-1-3p&offsets|0|0|CAACAAATCACAGTCTGCCATA	-		SQLE|6713	MIMAT0004601&MI0000461&hsa-miR-145-3p&offsets|+2|0|ATTCCTGGAAATACTGTTCT	-		-	-	-
-	-	-		CSK|1445	MIMAT0001340&MI0001445&hsa-miR-423-3p&offsets|+1|0|GCTCGGTCTGAGGCCCCTCAGT	-		ECT2|1894	MIMAT0000253&MI0000266&hsa-miR-10a-5p&offsets|0|-4|TACCCTGTAGATCCGAATT	-		-	-	-
-	-	-		POGK|57645	MIMAT0000078&MI0000079&hsa-miR-23a-3p&offsets|0|-1|ATCACATTGCCAGGGATTTC	-		PLCB3|5331	MIMAT0000446&MI0000472&hsa-miR-127-3p&offsets|0|+1|TCGGATCCGTCTGAGCTTGGCTG	-		-	-	-
-	-	-		MAD2L2|10459	MIMAT0004497&MI0000081&hsa-miR-24-2-5p&offsets|-1|0|GTGCCTACTGAGCTGAAACACAG	-		SLC25A10|1468	MIMAT0002814&MI0003133&hsa-miR-432-5p&offsets|0|0|TCTTGGAGTAGGTCATTGGGTGG	-		-	-	-
-	-	-		PTDSS1|9791	MIMAT0000070&MI0000071&hsa-miR-17-5p&offsets|-1|-2|TCAAAGTGCTTACAGTGCAGGT	-		DAP3|7818	MIMAT0000088&MI0000088&hsa-miR-30a-3p&offsets|0|-2|CTTTCAGTCGGATGTTTGCA	-		-	-	-
-	-	-		ACTR3|10096	MIMAT0000076&MI0000077&hsa-miR-21-5p&offsets|+5|+6|TATCAGACTGATGTTGACTGTTG	-		SHMT2|6472	MIMAT0004601&MI0000461&hsa-miR-145-3p&offsets|+1|0|GATTCCTGGAAATACTGTTCT	-		-	-	-
-	-	-		ELAVL1|1994	MIMAT0000101&MI0000108&hsa-miR-103a-3p&offsets|+4|-1,MIMAT0000101&MI0000109&hsa-miR-103a-3p&offsets|+4|-1|GCATTGTACAGGGCTATG	-		COL11A1|1301	MIMAT0000444&MI0000471&hsa-miR-126-5p&offsets|0|-1|CATTATTACTTTTGGTACGC	-		-	-	-
-	-	-		DPY30|84661	MIMAT0003393&MI0001448&hsa-miR-425-5p&offsets|0|-2|AATGACACGATCACTCCCGTT	-		C6orf125|84300	MIMAT0004614&MI0000487&hsa-miR-193a-5p&offsets|0|-3|TGGGTCTTTGCGGGCGAGA	-		-	-	-
-	-	-		SLC39A4|55630	MIMAT0000259&MI0000272&hsa-miR-182-5p&offsets|+1|-3|TTGGCAATGGTAGAACTCAC	-		MRPL38|64978	MIMAT0000435&MI0000459&hsa-miR-143-3p&offsets|0|+2|TGAGATGAAGCACTGTAGCTCAG	-		-	-	-
-	-	-		PLOD3|8985	MIMAT0000093&MI0000095&hsa-miR-93-5p&offsets|0|-3|CAAAGTGCTGTTCGTGCAGG	-		MRPL4|51073	MIMAT0000435&MI0000459&hsa-miR-143-3p&offsets|+1|-3|GAGATGAAGCACTGTAG	-		-	-	-
-	-	-		UBE2Q1|55585	MIMAT0004484&MI0000065&hsa-let-7d-3p&offsets|0|-1|CTATACGACCTGCTGCCTTTC	-		BGN|633	MIMAT0001631&MI0001729&hsa-miR-451a&offsets|0|0|AAACCGTTACCATTACTGAGTT	-		-	-	-
-	-	-		COMP|1311	MIMAT0000084&MI0000085&hsa-miR-27a-3p&offsets|0|-3,MIMAT0000419&MI0000440&hsa-miR-27b-3p&offsets|0|-3|TTCACAGTGGCTAAGTTC	-		MTHFD2|10797	MIMAT0000450&MI0000478&hsa-miR-149-5p&offsets|0|0|TCTGGCTCCGTGTCTTCACTCCC	-		-	-	-
-	-	-		TBCE|6905	MIMAT0004926&MI0005543&hsa-miR-708-5p&offsets|0|0|AAGGAGCTTACAATCTAGCTGGG	-		C11orf24|53838	MIMAT0002173&MI0002467&hsa-miR-483-3p&offsets|+1|+2|CACTCCTCTCCTCCCGTCTTCT	-		-	-	-
-	-	-		TBRG4|9238	MIMAT0000415&MI0000434&hsa-let-7i-5p&offsets|0|-1|TGAGGTAGTAGTTTGTGCTGT	-		PGK1|5230	MIMAT0001631&MI0001729&hsa-miR-451a&offsets|0|-2|AAACCGTTACCATTACTGAG	-		-	-	-
-	-	-		GATAD2A|54815	MIMAT0004774&MI0003185&hsa-miR-501-3p&offsets|0|0|AATGCACCCGGGCAAGGATTCT	-		ROMO1|140823	MIMAT0000710&MI0000767&hsa-miR-365a-3p&offsets|0|-1,MIMAT0022834&MI0000769&hsa-miR-365b-3p&offsets|0|-1|TAATGCCCCTAAAAATCCTTA	-		-	-	-
-	-	-		ATAD3A|55210	MIMAT0000414&MI0000433&hsa-let-7g-5p&offsets|-1|0|CTGAGGTAGTAGTTTGTACAGTT	-		TEAD4|7004	MIMAT0000435&MI0000459&hsa-miR-143-3p&offsets|-1|0|CTGAGATGAAGCACTGTAGCTC	-		-	-	-
-	-	-		SAMD1|90378	MIMAT0000680&MI0000734&hsa-miR-106b-5p&offsets|0|-1|TAAAGTGCTGACAGTGCAGA	-		PSMG1|8624	MIMAT0003879&MI0003757&hsa-miR-758-3p&offsets|0|0|TTTGTGACCTGGTCCACTAACC	-		-	-	-
-	-	-		CHPF|79586	MIMAT0002876&MI0003190&hsa-miR-505-3p&offsets|0|+1|CGTCAACACTTGCTGGTTTCCTC	-		DCTPP1|79077	MIMAT0000253&MI0000266&hsa-miR-10a-5p&offsets|+1|-7|ACCCTGTAGATCCGA	-		-	-	-
-	-	-		YDJC|150223	MIMAT0000080&MI0000081&hsa-miR-24-3p&offsets|0|-3,MIMAT0000080&MI0000080&hsa-miR-24-3p&offsets|0|-3|TGGCTCAGTTCAGCAGGAA	-		GJB2|2706	MIMAT0004511&MI0000101&hsa-miR-99a-3p&offsets|0|0|CAAGCTCGCTTCTATGGGTCTG	-		-	-	-
-	-	-		MMP9|4318	MIMAT0004799&MI0003599&hsa-miR-589-5p&offsets|0|+1|TGAGAACCACGTCTGCTCTGAGC	-		PTGES2|80142	MIMAT0004515&MI0000107&hsa-miR-29b-2-5p&offsets|0|0|CTGGTTTCACATGGTGGCTTAG	-		-	-	-
-	-	-		HYOU1|10525	MIMAT0001413&MI0001519&hsa-miR-20b-5p&offsets|0|0|CAAAGTGCTCATAGTGCAGGTAG	-		ABCD1|215	MIMAT0001631&MI0001729&hsa-miR-451a&offsets|0|-1|AAACCGTTACCATTACTGAGT	-		-	-	-
-	-	-		PPIH|10465	MIMAT0000414&MI0000433&hsa-let-7g-5p&offsets|0|0|TGAGGTAGTAGTTTGTACAGTT	-		KIFC2|90990	MIMAT0000098&MI0000102&hsa-miR-100-5p&offsets|0|-3|AACCCGTAGATCCGAACTT	-		-	-	-
-	-	-		HIST2H2AA3|8337	MIMAT0000081&MI0000082&hsa-miR-25-3p&offsets|+1|0|ATTGCACTTGTCTCGGTCTGA	-		DBF4|10926	MIMAT0000443&MI0000469&hsa-miR-125a-5p&offsets|0|-2|TCCCTGAGACCCTTTAACCTGT	-		-	-	-
-	-	-		MARCKSL1|65108	MI0000081&hsa-mir-24-2&coords|19|-|13947139|13947162|GTGCCTACTGAGCTGAAACACAGT	-		GRAMD1A|57655	MIMAT0000266&MI0000285&hsa-miR-205-5p&offsets|0|0|TCCTTCATTCCACCGGAGTCTG	-		-	-	-
-	-	-		TAPBP|6892	MIMAT0026738&MI0006349&hsa-miR-1287-3p&offsets|0|0|CTCTAGCCACAGATGCAGTGAT	-		PFKL|5211	MIMAT0000266&MI0000285&hsa-miR-205-5p&offsets|0|-2|TCCTTCATTCCACCGGAGTC	-		-	-	-
-	-	-		ACAN|176	MIMAT0000456&MI0000483&hsa-miR-186-5p&offsets|0|+2|CAAAGAATTCTCCTTTTGGGCTTT	-		KRTCAP2|200185	MIMAT0000435&MI0000459&hsa-miR-143-3p&offsets|-2|-3|TCTGAGATGAAGCACTGTAG	-		-	-	-
-	-	-		BOLA2|552900	MIMAT0000093&MI0000095&hsa-miR-93-5p&offsets|0|-1|CAAAGTGCTGTTCGTGCAGGTA	-		NCAPD2|9918	MIMAT0022721&MI0006382&hsa-miR-1247-3p&offsets|+3|-1|CGGGAACGTCGAGACTGGAG	-		-	-	-
-	-	-		RPP25|54913	MIMAT0000682&MI0000737&hsa-miR-200a-3p&offsets|0|-1|TAACACTGTCTGGTAACGATG	-		CDC25B|994	MIMAT0000100&MI0000107&hsa-miR-29b-3p&offsets|-1|-2,MIMAT0000100&MI0000105&hsa-miR-29b-3p&offsets|-1|-2|CTAGCACCATTTGAAATCAGTG	-		-	-	-
-	-	-		C19orf28|126321	MIMAT0004780&MI0003205&hsa-miR-532-3p&offsets|0|0|CCTCCCACACCCAAGGCTTGCA	-		ARHGDIA|396	MIMAT0000756&MI0000808&hsa-miR-326&offsets|0|0|CCTCTGGGCCCTTCCTCCAG	-		-	-	-
-	-	-		PTBP1|5725	MIMAT0000075&MI0000076&hsa-miR-20a-5p&offsets|0|-1|TAAAGTGCTTATAGTGCAGGTA	-		HMGB2|3148	MIMAT0000088&MI0000088&hsa-miR-30a-3p&offsets|+1|-3|TTTCAGTCGGATGTTTGC	-		-	-	-
-	-	-		KDELR3|11015	MIMAT0000414&MI0000433&hsa-let-7g-5p&offsets|+3|0|GGTAGTAGTTTGTACAGTT	-		TCEB1|6921	MIMAT0000435&MI0000459&hsa-miR-143-3p&offsets|-1|-3|CTGAGATGAAGCACTGTAG	-		-	-	-
-	-	-		PYCRL|65263	MIMAT0000081&MI0000082&hsa-miR-25-3p&offsets|0|-5|CATTGCACTTGTCTCGG	-		MGAT4B|11282	MIMAT0000275&MI0000294&hsa-miR-218-5p&offsets|0|+2,MIMAT0000275&MI0000295&hsa-miR-218-5p&offsets|0|+2|TTGTGCTTGATCTAACCATGTGG	-		-	-	-
-	-	-		POLD1|5424	MIMAT0022726&MI0006443&hsa-miR-1306-5p&offsets|0|0|CCACCTCCCCTGCAAACGTCCA	-		DCAF13|25879	MIMAT0000437&MI0000461&hsa-miR-145-5p&offsets|0|+1|GTCCAGTTTTCCCAGGAATCCCTT	-		-	-	-
-	-	-		RBM34|23029	MIMAT0000226&MI0000279&hsa-miR-196a-5p&offsets|0|+1|TAGGTAGTTTCATGTTGTTGGGA	-		GPI|2821	MIMAT0000443&MI0000469&hsa-miR-125a-5p&offsets|0|-3|TCCCTGAGACCCTTTAACCTG	-		-	-	-
-	-	-		SLC25A22|79751	MIMAT0004495&MI0000078&hsa-miR-22-5p&offsets|0|-1|AGTTCTTCAGTGGCAAGCTTT	-		GALK1|2584	MIMAT0000416&MI0000437&hsa-miR-1&offsets|0|0,MIMAT0000416&MI0000651&hsa-miR-1&offsets|0|0|TGGAATGTAAAGAAGTATGTAT	-		-	-	-
-	-	-		C16orf57|79650	MIMAT0004678&MI0000746&hsa-miR-99b-3p&offsets|0|0|CAAGCTCGTGTCTGTGGGTCCG	-		SEC13|6396	MIMAT0002176&MI0002469&hsa-miR-485-3p&offsets|0|0|GTCATACACGGCTCTCCTCTCT	-		-	-	-
-	-	-		RPP21|79897	MIMAT0004797&MI0003589&hsa-miR-582-3p&offsets|+1|0|AACTGGTTGAACAACTGAACC	-		ARPC5L|81873	MIMAT0000435&MI0000459&hsa-miR-143-3p&offsets|0|+1|TGAGATGAAGCACTGTAGCTCA	-		-	-	-
-	-	-		SUV39H1|6839	MIMAT0000101&MI0000108&hsa-miR-103a-3p&offsets|+1|-1,MIMAT0000101&MI0000109&hsa-miR-103a-3p&offsets|+1|-1|GCAGCATTGTACAGGGCTATG	-		TMSB10|9168	MIMAT0000253&MI0000266&hsa-miR-10a-5p&offsets|0|-1|TACCCTGTAGATCCGAATTTGT	-		-	-	-
-	-	-		TMEM147|10430	MIMAT0003241&MI0003583&hsa-miR-576-5p&offsets|0|0|ATTCTAATTTCTCCACGTCTTT	-		NDUFS2|4720	MIMAT0004814&MI0003676&hsa-miR-654-3p&offsets|0|-2|TATGTCTGCTGACCATCACC	-		-	-	-
-	-	-		PTP4A3|11156	MIMAT0000692&MI0000749&hsa-miR-30e-5p&offsets|0|-2|TGTAAACATCCTTGACTGGA	-		ERI3|79033	MIMAT0000097&MI0000101&hsa-miR-99a-5p&offsets|-1|-1|AAACCCGTAGATCCGATCTTGT	-		-	-	-
-	-	-		RUSC1|23623	MIMAT0000617&MI0000650&hsa-miR-200c-3p&offsets|0|-3|TAATACTGCCGGGTAATGAT	-		ATP6V1F|9296	MIMAT0000087&MI0000088&hsa-miR-30a-5p&offsets|0|-3|TGTAAACATCCTCGACTGG	-		-	-	-
-	-	-		LRWD1|222229	MIMAT0004797&MI0003589&hsa-miR-582-3p&offsets|0|0|TAACTGGTTGAACAACTGAACC	-		PNP|4860	MIMAT0000736&MI0000789&hsa-miR-381-3p&offsets|0|0|TATACAAGGGCAAGCTCTCTGT	-		-	-	-
-	-	-		PSMD2|5708	MIMAT0017985&MI0015997&hsa-miR-3607-3p&offsets|0|0|ACTGTAAACGCTTTCTGATG	-		TBC1D7|51256	MIMAT0005899&MI0006382&hsa-miR-1247-5p&offsets|0|0|ACCCGTCCCGTTCGTCCCCGGA	-		-	-	-
-	-	-		MRPL17|63875	MIMAT0000279&MI0000299&hsa-miR-222-3p&offsets|0|0|AGCTACATCTGGCTACTGGGT	-		SNRPD1|6632	MIMAT0000275&MI0000294&hsa-miR-218-5p&offsets|0|0,MIMAT0000275&MI0000295&hsa-miR-218-5p&offsets|0|0|TTGTGCTTGATCTAACCATGT	-		-	-	-
-	-	-		SMG5|23381	MIMAT0000455&MI0000482&hsa-miR-185-5p&offsets|0|0|TGGAGAGAAAGGCAGTTCCTGA	-		LONP1|9361	MIMAT0000443&MI0000469&hsa-miR-125a-5p&offsets|0|-5|TCCCTGAGACCCTTTAACC	-		-	-	-
-	-	-		SLC35F2|54733	MIMAT0002821&MI0003139&hsa-miR-181d-5p&offsets|0|-1|AACATTCATTGTTGTCGGTGGG	-		AXIN1|8312	MIMAT0000077&MI0000078&hsa-miR-22-3p&offsets|+1|0|AGCTGCCAGTTGAAGAACTGT	-		-	-	-
-	-	-		TMEM79|84283	MIMAT0004926&MI0005543&hsa-miR-708-5p&offsets|0|-1|AAGGAGCTTACAATCTAGCTGG	-		POR|5447	MIMAT0004600&MI0000460&hsa-miR-144-5p&offsets|0|0|GGATATCATCATATACTGTAAG	-		-	-	-
-	-	-		RPUSD1|113000	MIMAT0000243&MI0000253&hsa-miR-148a-3p&offsets|+1|0|CAGTGCACTACAGAACTTTGT	-		HIST1H1C|3006	MIMAT0022929&MI0003757&hsa-miR-758-5p&offsets|+1|+1|ATGGTTGACCAGAGAGCACACG	-		-	-	-
-	-	-		MRPL37|51253	MIMAT0001341&MI0001446&hsa-miR-424-5p&offsets|0|-1|CAGCAGCAATTCATGTTTTGA	-		GUK1|2987	MIMAT0000266&MI0000285&hsa-miR-205-5p&offsets|0|-3|TCCTTCATTCCACCGGAGT	-		-	-	-
-	-	-		SPP1|6696	MIMAT0004810&MI0003643&hsa-miR-629-5p&offsets|+4|+6|TTTACGTTGGGAGAACTTTTACG	-		TMEM79|84283	MIMAT0000064&MI0000064&hsa-let-7c-5p&offsets|0|+1|TGAGGTAGTAGGTTGTATGGTTT	-		-	-	-
-	-	-		TMEM183A|92703	MIMAT0004507&MI0000093&hsa-miR-92a-1-5p&offsets|0|0|AGGTTGGGATCGGTTGCAATGCT	-		MRPL55|128308	MIMAT0000444&MI0000471&hsa-miR-126-5p&offsets|0|0|CATTATTACTTTTGGTACGCG	-		-	-	-
-	-	-		EIF5AL1|143244	MIMAT0000092&MI0000093&hsa-miR-92a-3p&offsets|0|-2,MIMAT0000092&MI0000094&hsa-miR-92a-3p&offsets|0|-2|TATTGCACTTGTCCCGGCCT	-		ARPC1B|10095	MIMAT0000088&MI0000088&hsa-miR-30a-3p&offsets|+1|-1|TTTCAGTCGGATGTTTGCAG	-		-	-	-
-	-	-		MRPL3|11222	MIMAT0000417&MI0000438&hsa-miR-15b-5p&offsets|0|-2|TAGCAGCACATCATGGTTTA	-		B4GALT3|8703	MIMAT0004500&MI0000084&hsa-miR-26b-3p&offsets|0|0|CCTGTTCTCCATTACTTGGCTC	-		-	-	-
-	-	-		FBXO45|200933	MIMAT0004484&MI0000065&hsa-let-7d-3p&offsets|0|-2|CTATACGACCTGCTGCCTTT	-		DDX11|1663	MIMAT0000722&MI0000778&hsa-miR-370-3p&offsets|0|-1|GCCTGCTGGGGTGGAACCTGG	-		-	-	-
-	-	-		RGS19|10287	MIMAT0000757&MI0000809&hsa-miR-151a-3p&offsets|0|+1|CTAGACTGAAGCTCCTTGAGGA	-		NFE2L3|9603	MIMAT0000263&MI0000282&hsa-miR-199b-5p&offsets|0|+1|CCCAGTGTTTAGACTATCTGTTCA	-		-	-	-
-	-	-		ZC3H3|23144	MIMAT0000074&MI0000074&hsa-miR-19b-3p&offsets|0|-1,MIMAT0000074&MI0000075&hsa-miR-19b-3p&offsets|0|-1|TGTGCAAATCCATGCAAAACTG	-		DAXX|1616	MIMAT0003163&MI0003514&hsa-miR-539-5p&offsets|0|+1|GGAGAAATTATCCTTGGTGTGTT	-		-	-	-
-	-	-		GRAMD1A|57655	MIMAT0003338&MI0003684&hsa-miR-660-5p&offsets|0|+1|TACCCATTGCATATCGGAGTTGT	-		AZI1|22994	MIMAT0003329&MI0003675&hsa-miR-411-5p&offsets|-1|0|ATAGTAGACCGTATAGCGTACG	-		-	-	-
-	-	-		SNRPE|6635	MIMAT0000080&MI0000081&hsa-miR-24-3p&offsets|+1|0,MIMAT0000080&MI0000080&hsa-miR-24-3p&offsets|+1|0|GGCTCAGTTCAGCAGGAACAG	-		PPIL1|51645	MIMAT0000450&MI0000478&hsa-miR-149-5p&offsets|0|-1|TCTGGCTCCGTGTCTTCACTCC	-		-	-	-
-	-	-		EIF5A|1984	MIMAT0000081&MI0000082&hsa-miR-25-3p&offsets|0|-1|CATTGCACTTGTCTCGGTCTG	-		C9orf142|286257	MIMAT0000098&MI0000102&hsa-miR-100-5p&offsets|0|-4|AACCCGTAGATCCGAACT	-		-	-	-
-	-	-		TIMM17B|10245	MIMAT0004927&MI0005543&hsa-miR-708-3p&offsets|0|+1|CAACTAGACTGTGAGCTTCTAGA	-		GIYD2|79008	MIMAT0026483&MI0000778&hsa-miR-370-5p&offsets|0|0|CAGGTCACGTCTCTGCAGTTAC	-		-	-	-
-	-	-		MORC2|22880	MIMAT0004493&MI0000076&hsa-miR-20a-3p&offsets|0|+1|ACTGCATTATGAGCACTTAAAGT	-		PYGO2|90780	MIMAT0000737&MI0000790&hsa-miR-382-5p&offsets|0|0|GAAGTTGTTCGTGGTGGATTCG	-		-	-	-
-	-	-		SEC61G|23480	MIMAT0000753&MI0000805&hsa-miR-342-3p&offsets|0|-1|TCTCACACAGAAATCGCACCCG	-		FAM127B|26071	MIMAT0000690&MI0000747&hsa-miR-296-5p&offsets|0|0|AGGGCCCCCCCTCAATCCTGT	-		-	-	-
-	-	-		TSPAN33|340348	MIMAT0000078&MI0000079&hsa-miR-23a-3p&offsets|+1|+2|TCACATTGCCAGGGATTTCCAA	-		SNRNP25|79622	MIMAT0000437&MI0000461&hsa-miR-145-5p&offsets|0|-3|GTCCAGTTTTCCCAGGAATC	-		-	-	-
-	-	-		SDF2L1|23753	MIMAT0000440&MI0000465&hsa-miR-191-5p&offsets|0|-1|CAACGGAATCCCAAAAGCAGCT	-		CDK2AP2|10263	MIMAT0000423&MI0000446&hsa-miR-125b-5p&offsets|+1|0,MIMAT0000423&MI0000470&hsa-miR-125b-5p&offsets|+1|0|CCCTGAGACCCTAACTTGTGA	-		-	-	-
-	-	-		EBNA1BP2|10969	MIMAT0000067&MI0000067&hsa-let-7f-5p&offsets|+1|0,MIMAT0000067&MI0000068&hsa-let-7f-5p&offsets|+1|0|GAGGTAGTAGATTGTATAGTT	-		ST14|6768	MIMAT0000098&MI0000102&hsa-miR-100-5p&offsets|0|-1|AACCCGTAGATCCGAACTTGT	-		-	-	-
-	-	-		CSE1L|1434	MIMAT0000761&MI0000813&hsa-miR-324-5p&offsets|0|-2|CGCATCCCCTAGGGCATTGGT	-		CSTB|1476	MIMAT0000098&MI0000102&hsa-miR-100-5p&offsets|0|-2|AACCCGTAGATCCGAACTTG	-		-	-	-
-	-	-		NOP56|10528	MIMAT0004810&MI0003643&hsa-miR-629-5p&offsets|0|0|TGGGTTTACGTTGGGAGAACT	-		RRS1|23212	MIMAT0000088&MI0000088&hsa-miR-30a-3p&offsets|0|+1|CTTTCAGTCGGATGTTTGCAGCT	-		-	-	-
-	-	-		FAM49B|51571	MIMAT0000318&MI0000342&hsa-miR-200b-3p&offsets|0|-4|TAATACTGCCTGGTAATG	-		ELAVL1|1994	MIMAT0004603&MI0000470&hsa-miR-125b-2-3p&offsets|+2|0|ACAAGTCAGGCTCTTGGGAC	-		-	-	-
-	-	-		H2AFY|9555	MIMAT0000255&MI0000268&hsa-miR-34a-5p&offsets|0|-1|TGGCAGTGTCTTAGCTGGTTG	-		SBK1|388228	MIMAT0004703&MI0000816&hsa-miR-335-3p&offsets|-1|0|GTTTTTCATTATTGCTCCTGACC	-		-	-	-
-	-	-		WBSCR22|114049	MIMAT0000438&MI0000462&hsa-miR-152-3p&offsets|+1|0|CAGTGCATGACAGAACTTGG	-		HNRNPAB|3182	MIMAT0000710&MI0000767&hsa-miR-365a-3p&offsets|0|0,MIMAT0022834&MI0000769&hsa-miR-365b-3p&offsets|0|0|TAATGCCCCTAAAAATCCTTAT	-		-	-	-
-	-	-		NT5DC2|64943	MIMAT0000256&MI0000289&hsa-miR-181a-5p&offsets|+1|0,MIMAT0000256&MI0000269&hsa-miR-181a-5p&offsets|+1|0|ACATTCAACGCTGTCGGTGAGT	-		MGC70857|414919	MIMAT0004614&MI0000487&hsa-miR-193a-5p&offsets|0|-4|TGGGTCTTTGCGGGCGAG	-		-	-	-
-	-	-		EFNA4|1945	MIMAT0004809&MI0003642&hsa-miR-628-5p&offsets|+1|-1|TGCTGACATATTTACTAGAG	-		XIRP1|165904	MIMAT0000752&MI0000804&hsa-miR-328-3p&offsets|0|0|CTGGCCCTCTCTGCCCTTCCGT	-		-	-	-
-	-	-		TAP1|6890	MI0000469&hsa-mir-125a&coords|19|+|52196503|52196520|ATGTTGCCAGTCTCTAGG	-		PLXNA3|55558	MIMAT0000231&MI0000281&hsa-miR-199a-5p&offsets|0|-4,MIMAT0000231&MI0000242&hsa-miR-199a-5p&offsets|0|-4|CCCAGTGTTCAGACTACCT	-		-	-	-
-	-	-		WDR34|89891	MIMAT0000281&MI0000301&hsa-miR-224-5p&offsets|0|0|CAAGTCACTAGTGGTTCCGTT	-		MED26|9441	MIMAT0000435&MI0000459&hsa-miR-143-3p&offsets|0|0|TGAGATGAAGCACTGTAGCTC	-		-	-	-
-	-	-		GGCT|79017	MIMAT0000256&MI0000289&hsa-miR-181a-5p&offsets|0|0,MIMAT0000256&MI0000269&hsa-miR-181a-5p&offsets|0|0|AACATTCAACGCTGTCGGTGAGT	-		FRMD8|83786	MIMAT0000445&MI0000471&hsa-miR-126-3p&offsets|-1|-1|CTCGTACCGTGAGTAATAATGC	-		-	-	-
-	-	-		JMJD4|65094	MIMAT0000753&MI0000805&hsa-miR-342-3p&offsets|0|+1|TCTCACACAGAAATCGCACCCGTC	-		TRPM2|7226	MIMAT0000064&MI0000064&hsa-let-7c-5p&offsets|-1|0|TTGAGGTAGTAGGTTGTATGGTT	-		-	-	-
-	-	-		POLR3K|51728	MIMAT0004502&MI0000086&hsa-miR-28-3p&offsets|+1|0|ACTAGATTGTGAGCTCCTGGA	-		COX8A|1351	MIMAT0000064&MI0000064&hsa-let-7c-5p&offsets|-1|-3|TTGAGGTAGTAGGTTGTATG	-		-	-	-
-	-	-		FANCG|2189	MIMAT0000222&MI0000234&hsa-miR-192-5p&offsets|+1|0|TGACCTATGAATTGACAGCC	-		LRRC45|201255	MIMAT0000244&MI0000736&hsa-miR-30c-5p&offsets|0|-3,MIMAT0000244&MI0000254&hsa-miR-30c-5p&offsets|0|-3|TGTAAACATCCTACACTCTC	-		-	-	-
-	-	-		RAP2B|5912	MIMAT0004588&MI0000440&hsa-miR-27b-5p&offsets|0|0|AGAGCTTAGCTGATTGGTGAAC	-		MAD2L2|10459	MIMAT0004614&MI0000487&hsa-miR-193a-5p&offsets|0|-2|TGGGTCTTTGCGGGCGAGAT	-		-	-	-
-	-	-		MLLT11|10962	MIMAT0001340&MI0001445&hsa-miR-423-3p&offsets|0|0|AGCTCGGTCTGAGGCCCCTCAGT	-		CDK16|5127	MIMAT0000244&MI0000736&hsa-miR-30c-5p&offsets|0|-2,MIMAT0000244&MI0000254&hsa-miR-30c-5p&offsets|0|-2|TGTAAACATCCTACACTCTCA	-		-	-	-
-	-	-		CCT6A|908	MIMAT0002876&MI0003190&hsa-miR-505-3p&offsets|+1|+1|GTCAACACTTGCTGGTTTCCTC	-		PKP3|11187	MIMAT0000418&MI0000439&hsa-miR-23b-3p&offsets|+1|0|TCACATTGCCAGGGATTACC	-		-	-	-
-	-	-		C11orf24|53838	MIMAT0000259&MI0000272&hsa-miR-182-5p&offsets|+1|-2|TTGGCAATGGTAGAACTCACA	-		EIF6|3692	MIMAT0000087&MI0000088&hsa-miR-30a-5p&offsets|0|-2|TGTAAACATCCTCGACTGGA	-		-	-	-
-	-	-		NDUFB9|4715	MIMAT0000460&MI0000732&hsa-miR-194-5p&offsets|0|+1|TGTAACAGCAACTCCATGTGGAA	-		MMP14|4323	MIMAT0000266&MI0000285&hsa-miR-205-5p&offsets|0|+1|TCCTTCATTCCACCGGAGTCTGT	-		-	-	-
-	-	-		MARS|4141	MIMAT0003389&MI0003686&hsa-miR-542-3p&offsets|0|+1|TGTGACAGATTGATAACTGAAAG	-		PUS1|80324	MIMAT0000098&MI0000102&hsa-miR-100-5p&offsets|0|0|AACCCGTAGATCCGAACTTGTG	-		-	-	-
-	-	-		TARS|6897	MIMAT0000757&MI0000809&hsa-miR-151a-3p&offsets|0|-1|CTAGACTGAAGCTCCTTGAG	-		MVD|4597	MIMAT0001631&MI0001729&hsa-miR-451a&offsets|+1|+1|AACCGTTACCATTACTGAGTTT	-		-	-	-
-	-	-		CSNK2B|1460	MIMAT0004672&MI0000734&hsa-miR-106b-3p&offsets|-1|-1|ACCGCACTGTGGGTACTTGCTG	-		TRMU|55687	MIMAT0002808&MI0003127&hsa-miR-511-5p&offsets|0|0,MIMAT0002808&MI0003127&hsa-miR-511-5p&offsets|0|0|GTGTCTTTTGCTCTGCAGTCA	-		-	-	-
-	-	-		DPH2|1802	MIMAT0000456&MI0000483&hsa-miR-186-5p&offsets|0|0|CAAAGAATTCTCCTTTTGGGCT	-		TIMM17A|10440	MIMAT0000435&MI0000459&hsa-miR-143-3p&offsets|-1|-2|CTGAGATGAAGCACTGTAGC	-		-	-	-
-	-	-		C19orf48|84798	MIMAT0000081&MI0000082&hsa-miR-25-3p&offsets|0|-2|CATTGCACTTGTCTCGGTCT	-		RGS19|10287	MIMAT0003329&MI0003675&hsa-miR-411-5p&offsets|0|0|TAGTAGACCGTATAGCGTACG	-		-	-	-
-	-	-		TMEM158|25907	MIMAT0000074&MI0000074&hsa-miR-19b-3p&offsets|0|-3,MIMAT0000074&MI0000075&hsa-miR-19b-3p&offsets|0|-3|TGTGCAAATCCATGCAAAAC	-		EFNA1|1942	MIMAT0000088&MI0000088&hsa-miR-30a-3p&offsets|+1|+1|TTTCAGTCGGATGTTTGCAGCT	-		-	-	-
-	-	-		PSMD4|5710	MIMAT0000078&MI0000079&hsa-miR-23a-3p&offsets|+2|+1|CACATTGCCAGGGATTTCCA	-		MOSPD3|64598	MIMAT0001639&MI0001735&hsa-miR-409-3p&offsets|0|0|GAATGTTGCTCGGTGAACCCCT	-		-	-	-
-	-	-		SEPHS1|22929	MIMAT0002871&MI0003184&hsa-miR-500a-3p&offsets|+1|+1|TGCACCTGGGCAAGGATTCTGA	-		TNFRSF12A|51330	MIMAT0004513&MI0000103&hsa-miR-101-5p&offsets|-1|-1|TCAGTTATCACAGTGCTGATGC	-		-	-	-
-	-	-		PAICS|10606	MIMAT0000101&MI0000108&hsa-miR-103a-3p&offsets|+1|0,MIMAT0000101&MI0000109&hsa-miR-103a-3p&offsets|+1|0|GCAGCATTGTACAGGGCTATGA	-		CSNK2B|1460	MIMAT0000437&MI0000461&hsa-miR-145-5p&offsets|+1|-2|TCCAGTTTTCCCAGGAATCC	-		-	-	-
-	-	-		COPG|22820	MIMAT0000757&MI0000809&hsa-miR-151a-3p&offsets|0|-3|CTAGACTGAAGCTCCTTG	-		VARS|7407	MIMAT0000445&MI0000471&hsa-miR-126-3p&offsets|-1|-2|CTCGTACCGTGAGTAATAATG	-		-	-	-
-	-	-		PSAT1|29968	MIMAT0003218&MI0003560&hsa-miR-92b-3p&offsets|0|0|TATTGCACTCGTCCCGGCCTCC	-		IDH2|3418	MIMAT0000245&MI0000255&hsa-miR-30d-5p&offsets|0|-2|TGTAAACATCCCCGACTGGA	-		-	-	-
-	-	-		UQCRHL|440567	MIMAT0000222&MI0000234&hsa-miR-192-5p&offsets|+1|+3|TGACCTATGAATTGACAGCCAGT	-		BAIAP2L1|55971	MIMAT0001631&MI0001729&hsa-miR-451a&offsets|0|+1|AAACCGTTACCATTACTGAGTTT	-		-	-	-
-	-	-		CLEC7A|64581	MIMAT0004819&MI0003760&hsa-miR-671-3p&offsets|0|0|TCCGGTTCTCAGGGCTCCACC	-		TCEB2|6923	MIMAT0000435&MI0000459&hsa-miR-143-3p&offsets|+1|-1|GAGATGAAGCACTGTAGCT	-		-	-	-
-	-	-		C1QTNF6|114904	MIMAT0000103&MI0000113&hsa-miR-106a-5p&offsets|0|0|AAAAGTGCTTACAGTGCAGGTAG	-		HMBS|3145	MIMAT0004603&MI0000470&hsa-miR-125b-2-3p&offsets|-1|0|ATCACAAGTCAGGCTCTTGGGAC	-		-	-	-
-	-	-		GBP5|115362	MIMAT0000243&MI0000253&hsa-miR-148a-3p&offsets|+1|-1|CAGTGCACTACAGAACTTTG	-		C21orf45|54069	MIMAT0000083&MI0000084&hsa-miR-26b-5p&offsets|0|+2|TTCAAGTAATTCAGGATAGGTTG	-		-	-	-
-	-	-		KNTC1|9735	MIMAT0004564&MI0000290&hsa-miR-214-5p&offsets|+1|0|GCCTGTCTACACTTGCTGTGC	-		MTP18|51537	MIMAT0004615&MI0000489&hsa-miR-195-3p&offsets|0|0|CCAATATTGGCTGTGCTGCTCC	-		-	-	-
-	-	-		LRRC15|131578	MIMAT0004672&MI0000734&hsa-miR-106b-3p&offsets|-2|-3|TACCGCACTGTGGGTACTTGC	-		MCM6|4175	MIMAT0000253&MI0000266&hsa-miR-10a-5p&offsets|+3|-1|CCTGTAGATCCGAATTTGT	-		-	-	-
-	-	-		UCHL5|51377	MIMAT0000077&MI0000078&hsa-miR-22-3p&offsets|+2|0|GCTGCCAGTTGAAGAACTGT	-		TOR3A|64222	MIMAT0004603&MI0000470&hsa-miR-125b-2-3p&offsets|-1|-1|ATCACAAGTCAGGCTCTTGGGA	-		-	-	-
-	-	-		RRS1|23212	MIMAT0000078&MI0000079&hsa-miR-23a-3p&offsets|-1|-1|AATCACATTGCCAGGGATTTC	-		WIZ|58525	MIMAT0000435&MI0000459&hsa-miR-143-3p&offsets|0|-3|TGAGATGAAGCACTGTAG	-		-	-	-
-	-	-		DNMT1|1786	MIMAT0000069&MI0000070&hsa-miR-16-5p&offsets|0|-3,MIMAT0000069&MI0000115&hsa-miR-16-5p&offsets|0|-3|TAGCAGCACGTAAATATTG	-		JMJD4|65094	MIMAT0004482&MI0000063&hsa-let-7b-3p&offsets|0|-1|CTATACAACCTACTGCCTTCC	-		-	-	-
-	-	-		SLC35B1|10237	MIMAT0001340&MI0001445&hsa-miR-423-3p&offsets|0|-1|AGCTCGGTCTGAGGCCCCTCAG	-		MRPS7|51081	MIMAT0000731&MI0000786&hsa-miR-378a-5p&offsets|+1|0|TCCTGACTCCAGGTCCTGTGT	-		-	-	-
-	-	-		MASTL|84930	MIMAT0003389&MI0003686&hsa-miR-542-3p&offsets|-1|-1|TTGTGACAGATTGATAACTGAA	-		LRRC15|131578	MIMAT0000737&MI0000790&hsa-miR-382-5p&offsets|+1|0|AAGTTGTTCGTGGTGGATTCG	-		-	-	-
-	-	-		RPUSD3|285367	MIMAT0004810&MI0003643&hsa-miR-629-5p&offsets|0|-1|TGGGTTTACGTTGGGAGAAC	-		TBRG4|9238	MIMAT0001639&MI0001735&hsa-miR-409-3p&offsets|-1|0|CGAATGTTGCTCGGTGAACCCCT	-		-	-	-
-	-	-		APEX2|27301	MIMAT0000689&MI0000746&hsa-miR-99b-5p&offsets|+1|-1|ACCCGTAGAACCGACCTTGC	-		IGSF8|93185	MIMAT0000435&MI0000459&hsa-miR-143-3p&offsets|+3|+1|GATGAAGCACTGTAGCTCA	-		-	-	-
-	-	-		C1orf131|128061	MIMAT0000243&MI0000253&hsa-miR-148a-3p&offsets|+4|0|TGCACTACAGAACTTTGT	-		GMPPA|29926	MIMAT0000752&MI0000804&hsa-miR-328-3p&offsets|0|-1|CTGGCCCTCTCTGCCCTTCCG	-		-	-	-
-	-	-		UBE2V2|7336	MIMAT0000757&MI0000809&hsa-miR-151a-3p&offsets|0|-2|CTAGACTGAAGCTCCTTGA	-		FAM58A|92002	MIMAT0026472&MI0000064&hsa-let-7c-3p&offsets|0|-1|CTGTACAACCTTCTAGCTTTC	-		-	-	-
-	-	-		FAM96A|84191	MIMAT0004549&MI0000253&hsa-miR-148a-5p&offsets|0|0|AAAGTTCTGAGACACTCCGACT	-		FADS2|9415	MIMAT0000710&MI0000767&hsa-miR-365a-3p&offsets|0|+1,MIMAT0022834&MI0000769&hsa-miR-365b-3p&offsets|0|+1|TAATGCCCCTAAAAATCCTTATT	-		-	-	-
-	-	-		ENTPD7|57089	MIMAT0002888&MI0003205&hsa-miR-532-5p&offsets|0|+1|CATGCCTTGAGTGTAGGACCGTT	-		MEX3A|92312	MIMAT0000722&MI0000778&hsa-miR-370-3p&offsets|0|0|GCCTGCTGGGGTGGAACCTGGT	-		-	-	-
-	-	-		YKT6|10652	MIMAT0000440&MI0000465&hsa-miR-191-5p&offsets|0|-5|CAACGGAATCCCAAAAGC	-		POLR2F|5435	MIMAT0000681&MI0000735&hsa-miR-29c-3p&offsets|0|+1|TAGCACCATTTGAAATCGGTTAT	-		-	-	-
-	-	-		HSPA5|3309	MIMAT0000692&MI0000749&hsa-miR-30e-5p&offsets|+1|-2|GTAAACATCCTTGACTGGA	-		DCAF15|90379	MIMAT0003393&MI0001448&hsa-miR-425-5p&offsets|+1|-2|ATGACACGATCACTCCCGTT	-		-	-	-
-	-	-		LRFN4|78999	MIMAT0004558&MI0000269&hsa-miR-181a-2-3p&offsets|-1|-3|AACCACTGACCGTTGACTGT	-		CXCL11|6373	MIMAT0000692&MI0000749&hsa-miR-30e-5p&offsets|+1|-3|GTAAACATCCTTGACTGG	-		-	-	-
-	-	-		BANF1|8815	MIMAT0000510&MI0000542&hsa-miR-320a&offsets|+1|-1|AAAGCTGGGTTGAGAGGGCG	-		PES1|23481	MIMAT0000686&MI0000743&hsa-miR-34c-5p&offsets|0|0|AGGCAGTGTAGTTAGCTGATTGC	-		-	-	-
-	-	-		TMEM54|113452	MIMAT0000081&MI0000082&hsa-miR-25-3p&offsets|0|0|CATTGCACTTGTCTCGGTCTGA	-		FAM49B|51571	MIMAT0000733&MI0000787&hsa-miR-379-5p&offsets|0|+1|TGGTAGACTATGGAACGTAGGC	-		-	-	-
-	-	-		DHCR7|1717	MIMAT0004502&MI0000086&hsa-miR-28-3p&offsets|+1|-1|ACTAGATTGTGAGCTCCTGG	-		DDA1|79016	MIMAT0000736&MI0000789&hsa-miR-381-3p&offsets|0|-1|TATACAAGGGCAAGCTCTCTG	-		-	-	-
-	-	-		PSME4|23198	MIMAT0001341&MI0001446&hsa-miR-424-5p&offsets|0|-2|CAGCAGCAATTCATGTTTTG	-		UBE2Q1|55585	MIMAT0004911&MI0005532&hsa-miR-874-3p&offsets|0|+1|CTGCCCTGGCCCGAGGGACCGAC	-		-	-	-
-	-	-		CSTB|1476	MIMAT0000460&MI0000488&hsa-miR-194-5p&offsets|0|0,MIMAT0000460&MI0000732&hsa-miR-194-5p&offsets|0|0|TGTAACAGCAACTCCATGTGGA	-		GNB2|2783	MIMAT0000063&MI0000063&hsa-let-7b-5p&offsets|+1|-2|GAGGTAGTAGGTTGTGTGG	-		-	-	-
-	-	-		C1orf85|112770	MIMAT0000440&MI0000465&hsa-miR-191-5p&offsets|0|-2|CAACGGAATCCCAAAAGCAGC	-		TIMM17B|10245	MIMAT0000461&MI0000489&hsa-miR-195-5p&offsets|0|-2|TAGCAGCACAGAAATATTG	-		-	-	-
-	-	-		MRPL51|51258	MIMAT0002821&MI0003139&hsa-miR-181d-5p&offsets|0|0|AACATTCATTGTTGTCGGTGGGT	-		PLOD3|8985	MIMAT0000077&MI0000078&hsa-miR-22-3p&offsets|+1|-1|AGCTGCCAGTTGAAGAACTG	-		-	-	-
-	-	-		PGK1|5230	MIMAT0000280&MI0000300&hsa-miR-223-3p&offsets|+1|0|GTCAGTTTGTCAAATACCCCA	-		KRT16|3868	MIMAT0000087&MI0000088&hsa-miR-30a-5p&offsets|+1|0|GTAAACATCCTCGACTGGAAG	-		-	-	-
-	-	-		CBFB|865	MIMAT0000256&MI0000289&hsa-miR-181a-5p&offsets|0|-1,MIMAT0000256&MI0000269&hsa-miR-181a-5p&offsets|0|-1|AACATTCAACGCTGTCGGTGAG	-		HAX1|10456	MIMAT0002171&MI0002465&hsa-miR-410-3p&offsets|0|0|AATATAACACAGATGGCCTGT	-		-	-	-
-	-	-		HSF1|3297	MIMAT0000062&MI0000061&hsa-let-7a-5p&offsets|+4|0,MIMAT0000062&MI0000062&hsa-let-7a-5p&offsets|+4|0,MIMAT0000062&MI0000060&hsa-let-7a-5p&offsets|+4|0|GTAGTAGGTTGTATAGTT	-		NDUFA13|51079	MIMAT0000100&MI0000107&hsa-miR-29b-3p&offsets|-1|-3,MIMAT0000100&MI0000105&hsa-miR-29b-3p&offsets|-1|-3|CTAGCACCATTTGAAATCAGT	-		-	-	-
-	-	-		TSEN34|79042	MIMAT0003283&MI0003628&hsa-miR-615-3p&offsets|0|0|TCCGAGCCTGGGTCTCCCTCTT	-		NARF|26502	MIMAT0000063&MI0000063&hsa-let-7b-5p&offsets|+1|0|GAGGTAGTAGGTTGTGTGGTT	-		-	-	-
-	-	-		MGAT4B|11282	MIMAT0000617&MI0000650&hsa-miR-200c-3p&offsets|0|-5|TAATACTGCCGGGTAATG	-		CDKN2A|1029	MIMAT0000232&MI0000281&hsa-miR-199a-3p&offsets|0|0,MIMAT0000232&MI0000242&hsa-miR-199a-3p&offsets|0|0,MIMAT0004563&MI0000282&hsa-miR-199b-3p&offsets|0|0|ACAGTAGTCTGCACATTGGTTA	-		-	-	-
-	-	-		EXOSC3|51010	MIMAT0000080&MI0000081&hsa-miR-24-3p&offsets|0|-4,MIMAT0000080&MI0000080&hsa-miR-24-3p&offsets|0|-4|TGGCTCAGTTCAGCAGGA	-		SMC4|10051	MIMAT0000087&MI0000088&hsa-miR-30a-5p&offsets|+1|-1|GTAAACATCCTCGACTGGAA	-		-	-	-
-	-	-		TSEN54|283989	MIMAT0004558&MI0000269&hsa-miR-181a-2-3p&offsets|0|-1|ACCACTGACCGTTGACTGTAC	-		MRPL23|6150	MIMAT0000088&MI0000088&hsa-miR-30a-3p&offsets|+1|-2|TTTCAGTCGGATGTTTGCA	-		-	-	-
-	-	-		TAF11|6882	MIMAT0000279&MI0000299&hsa-miR-222-3p&offsets|0|-2|AGCTACATCTGGCTACTGG	-		SPNS1|83985	MIMAT0000088&MI0000088&hsa-miR-30a-3p&offsets|0|0|CTTTCAGTCGGATGTTTGCAGC	-		-	-	-
-	-	-		EIF2C2|27161	MIMAT0000074&MI0000074&hsa-miR-19b-3p&offsets|0|-2,MIMAT0000074&MI0000075&hsa-miR-19b-3p&offsets|0|-2|TGTGCAAATCCATGCAAAACT	-		NOC2L|26155	MIMAT0004585&MI0000434&hsa-let-7i-3p&offsets|0|-1|CTGCGCAAGCTACTGCCTTGC	-		-	-	-
-	-	-		VARS|7407	MIMAT0000450&MI0000478&hsa-miR-149-5p&offsets|0|-3|TCTGGCTCCGTGTCTTCACT	-		ABCB8|11194	MIMAT0000231&MI0000281&hsa-miR-199a-5p&offsets|0|-1,MIMAT0000231&MI0000242&hsa-miR-199a-5p&offsets|0|-1|CCCAGTGTTCAGACTACCTGTT	-		-	-	-
-	-	-		S100P|6286	MIMAT0004927&MI0005543&hsa-miR-708-3p&offsets|+2|+1|ACTAGACTGTGAGCTTCTAGA	-		PACSIN3|29763	MIMAT0000232&MI0000281&hsa-miR-199a-3p&offsets|0|+1,MIMAT0000232&MI0000242&hsa-miR-199a-3p&offsets|0|+1,MIMAT0004563&MI0000282&hsa-miR-199b-3p&offsets|0|+1|ACAGTAGTCTGCACATTGGTTAG	-		-	-	-
-	-	-		NR2F6|2063	MIMAT0000076&MI0000077&hsa-miR-21-5p&offsets|+5|+5|TATCAGACTGATGTTGACTGTT	-		TPD52L2|7165	MIMAT0000082&MI0000750&hsa-miR-26a-5p&offsets|0|+1,MIMAT0000082&MI0000083&hsa-miR-26a-5p&offsets|0|+1|TTCAAGTAATCCAGGATAGGCTG	-		-	-	-
-	-	-		DDOST|1650	MIMAT0000100&MI0000107&hsa-miR-29b-3p&offsets|0|-2,MIMAT0000100&MI0000105&hsa-miR-29b-3p&offsets|0|-2|TAGCACCATTTGAAATCAGTG	-		C1orf43|25912	MIMAT0002819&MI0003137&hsa-miR-193b-3p&offsets|0|+1|AACTGGCCCTCAAAGTCCCGCTT	-		-	-	-
-	-	-		ARPC1B|10095	MIMAT0000459&MI0000487&hsa-miR-193a-3p&offsets|0|0|AACTGGCCTACAAAGTCCCAGT	-		CCDC86|79080	MIMAT0003879&MI0003757&hsa-miR-758-3p&offsets|0|-1|TTTGTGACCTGGTCCACTAAC	-		-	-	-
-	-	-		NOP58|51602	MIMAT0000092&MI0000093&hsa-miR-92a-3p&offsets|0|-1,MIMAT0000092&MI0000094&hsa-miR-92a-3p&offsets|0|-1|TATTGCACTTGTCCCGGCCTG	-		ESRP1|54845	MIMAT0004682&MI0000760&hsa-miR-361-3p&offsets|+1|0|CCCCCAGGTGTGATTCTGATTT	-		-	-	-
-	-	-		MYO19|80179	MIMAT0004604&MI0000472&hsa-miR-127-5p&offsets|0|0|CTGAAGCTCAGAGGGCTCTGAT	-		AURKAIP1|54998	MIMAT0004606&MI0000475&hsa-miR-136-3p&offsets|0|0|CATCATCGTCTCAAATGAGTCT	-		-	-	-
-	-	-		PDIA3P|171423	MIMAT0004945&MI0005559&hsa-miR-744-5p&offsets|0|-1|TGCGGGGCTAGGGCTAACAGC	-		C19orf10|56005	MIMAT0000445&MI0000471&hsa-miR-126-3p&offsets|0|0|TCGTACCGTGAGTAATAATGCG	-		-	-	-
-	-	-		TBL2|26608	MIMAT0000419&MI0000440&hsa-miR-27b-3p&offsets|0|-1|TTCACAGTGGCTAAGTTCTG	-		TIMM10|26519	MIMAT0000062&MI0000061&hsa-let-7a-5p&offsets|+1|-1,MIMAT0000062&MI0000062&hsa-let-7a-5p&offsets|+1|-1,MIMAT0000062&MI0000060&hsa-let-7a-5p&offsets|+1|-1|GAGGTAGTAGGTTGTATAGT	-		-	-	-
-	-	-		ELK1|2002	MIMAT0000459&MI0000487&hsa-miR-193a-3p&offsets|0|-1|AACTGGCCTACAAAGTCCCAG	-		NOP56|10528	MIMAT0000445&MI0000471&hsa-miR-126-3p&offsets|0|-2|TCGTACCGTGAGTAATAATG	-		-	-	-
-	-	-		SLC39A1|27173	MIMAT0000092&MI0000093&hsa-miR-92a-3p&offsets|0|0,MIMAT0000092&MI0000094&hsa-miR-92a-3p&offsets|0|0|TATTGCACTTGTCCCGGCCTGT	-		MED8|112950	MIMAT0004482&MI0000063&hsa-let-7b-3p&offsets|0|-2|CTATACAACCTACTGCCTTC	-		-	-	-
-	-	-		BOP1|23246	MIMAT0004799&MI0003599&hsa-miR-589-5p&offsets|0|-1|TGAGAACCACGTCTGCTCTGA	-		SOLH|6650	MIMAT0004614&MI0000487&hsa-miR-193a-5p&offsets|0|-1|TGGGTCTTTGCGGGCGAGATG	-		-	-	-
-	-	-		RRP1|8568	MIMAT0004502&MI0000086&hsa-miR-28-3p&offsets|+2|+1|CTAGATTGTGAGCTCCTGGAG	-		UCK2|7371	MIMAT0000447&MI0000474&hsa-miR-134-5p&offsets|0|-2|TGTGACTGGTTGACCAGAGG	-		-	-	-
-	-	-		ADRM1|11047	MIMAT0000415&MI0000434&hsa-let-7i-5p&offsets|0|0|TGAGGTAGTAGTTTGTGCTGTT	-		RAN|5901	MIMAT0000443&MI0000469&hsa-miR-125a-5p&offsets|+1|-2|CCCTGAGACCCTTTAACCTGT	-		-	-	-
-	-	-		PKM2|5315	MIMAT0000318&MI0000342&hsa-miR-200b-3p&offsets|0|-2|TAATACTGCCTGGTAATGAT	-		PDCD5|9141	MIMAT0000253&MI0000266&hsa-miR-10a-5p&offsets|+1|-2|ACCCTGTAGATCCGAATTTG	-		-	-	-
-	-	-		CAPZA1|829	MIMAT0000066&MI0000066&hsa-let-7e-5p&offsets|0|0|TGAGGTAGGAGGTTGTATAGTT	-		CABLES2|81928	MIMAT0000425&MI0000448&hsa-miR-130a-3p&offsets|0|-2|CAGTGCAATGTTAAAAGGGC	-		-	-	-
-	-	-		SNRPF|6636	MIMAT0000689&MI0000746&hsa-miR-99b-5p&offsets|0|-2|CACCCGTAGAACCGACCTTG	-		RIPK2|8767	MIMAT0004597&MI0000456&hsa-miR-140-3p&offsets|+2|+3|CCACAGGGTAGAACCACGGACA	-		-	-	-
-	-	-		RBM38|55544	MIMAT0004780&MI0003205&hsa-miR-532-3p&offsets|0|-1|CCTCCCACACCCAAGGCTTGC	-		DPH2|1802	MIMAT0000731&MI0000786&hsa-miR-378a-5p&offsets|0|-2|CTCCTGACTCCAGGTCCTGT	-		-	-	-
-	-	-		COX4NB|10328	MIMAT0000077&MI0000078&hsa-miR-22-3p&offsets|0|-1|AAGCTGCCAGTTGAAGAACTG	-		PSMC2|5701	MIMAT0000245&MI0000255&hsa-miR-30d-5p&offsets|0|-3|TGTAAACATCCCCGACTGG	-		-	-	-
-	-	-		TIMM50|92609	MIMAT0000077&MI0000078&hsa-miR-22-3p&offsets|0|-4|AAGCTGCCAGTTGAAGAA	-		AUP1|550	MIMAT0000063&MI0000063&hsa-let-7b-5p&offsets|0|-1|TGAGGTAGTAGGTTGTGTGGT	-		-	-	-
-	-	-		NOP16|51491	MIMAT0000259&MI0000272&hsa-miR-182-5p&offsets|+1|-4|TTGGCAATGGTAGAACTCA	-		MANF|7873	MIMAT0004515&MI0000107&hsa-miR-29b-2-5p&offsets|0|+1|CTGGTTTCACATGGTGGCTTAGA	-		-	-	-
-	-	-		FBN2|2201	MIMAT0004909&MI0005531&hsa-miR-450b-5p&offsets|0|-1|TTTTGCAATATGTTCCTGAAT	-		HIST1H2BK|85236	MIMAT0000063&MI0000063&hsa-let-7b-5p&offsets|0|-2|TGAGGTAGTAGGTTGTGTGG	-		-	-	-
-	-	-		XPO6|23214	MIMAT0004927&MI0005543&hsa-miR-708-3p&offsets|0|0|CAACTAGACTGTGAGCTTCTAG	-		PHKG2|5261	MIMAT0000097&MI0000101&hsa-miR-99a-5p&offsets|+2|-1|CCCGTAGATCCGATCTTGT	-		-	-	-
-	-	-		B4GALT2|8704	MIMAT0000415&MI0000434&hsa-let-7i-5p&offsets|0|-2|TGAGGTAGTAGTTTGTGCTG	-		C19orf53|28974	MIMAT0000253&MI0000266&hsa-miR-10a-5p&offsets|+1|+1|ACCCTGTAGATCCGAATTTGTGT	-		-	-	-
-	-	-		RPS6KB2|6199	MIMAT0000692&MI0000749&hsa-miR-30e-5p&offsets|0|-4|TGTAAACATCCTTGACTG	-		TOMM40L|84134	MIMAT0004703&MI0000816&hsa-miR-335-3p&offsets|0|0|TTTTTCATTATTGCTCCTGACC	-		-	-	-
-	-	-		HNRNPL|3191	MIMAT0000092&MI0000093&hsa-miR-92a-3p&offsets|+1|+1|ATTGCACTTGTCCCGGCCTGTT	-		SRC|6714	MIMAT0004606&MI0000475&hsa-miR-136-3p&offsets|+1|0|ATCATCGTCTCAAATGAGTCT	-		-	-	-
-	-	-		TOMM34|10953	MIMAT0000069&MI0000070&hsa-miR-16-5p&offsets|0|-1,MIMAT0000069&MI0000115&hsa-miR-16-5p&offsets|0|-1|TAGCAGCACGTAAATATTGGC	-		SRRT|51593	MIMAT0000063&MI0000063&hsa-let-7b-5p&offsets|0|0|TGAGGTAGTAGGTTGTGTGGTT	-		-	-	-
-	-	-		SLC39A7|7922	MIMAT0000068&MI0000069&hsa-miR-15a-5p&offsets|0|-2|TAGCAGCACATAATGGTTTG	-		USP5|8078	MIMAT0000253&MI0000266&hsa-miR-10a-5p&offsets|-1|-3|ATACCCTGTAGATCCGAATTT	-		-	-	-
-	-	-		YIF1A|10897	MIMAT0000101&MI0000108&hsa-miR-103a-3p&offsets|0|0,MIMAT0000101&MI0000109&hsa-miR-103a-3p&offsets|0|0|AGCAGCATTGTACAGGGCTATGA	-		RPS6KA4|8986	MIMAT0000253&MI0000266&hsa-miR-10a-5p&offsets|0|-2|TACCCTGTAGATCCGAATTTG	-		-	-	-
-	-	-		CHTF18|63922	MIMAT0000092&MI0000093&hsa-miR-92a-3p&offsets|0|+1|TATTGCACTTGTCCCGGCCTGTT	-		TMEM189|387521	MIMAT0000418&MI0000439&hsa-miR-23b-3p&offsets|+1|+2|TCACATTGCCAGGGATTACCAC	-		-	-	-
-	-	-		MEA1|4201	MIMAT0004955&MI0005566&hsa-miR-374b-5p&offsets|0|0|ATATAATACAACCTGCTAAGTG	-		CDC123|8872	MIMAT0000253&MI0000266&hsa-miR-10a-5p&offsets|0|0|TACCCTGTAGATCCGAATTTGTG	-		-	-	-
-	-	-		ZNF598|90850	MIMAT0002881&MI0005530&hsa-miR-509-3p&offsets|0|0,MIMAT0002881&MI0005717&hsa-miR-509-3p&offsets|0|0,MIMAT0002881&MI0003196&hsa-miR-509-3p&offsets|0|0|TGATTGGTACGTCTGTGGGTAG	-		BCL7C|9274	MIMAT0000244&MI0000736&hsa-miR-30c-5p&offsets|0|-1,MIMAT0000244&MI0000254&hsa-miR-30c-5p&offsets|0|-1|TGTAAACATCCTACACTCTCAG	-		-	-	-
-	-	-		STRA13|201254	MIMAT0003393&MI0001448&hsa-miR-425-5p&offsets|+1|+2|ATGACACGATCACTCCCGTTGAGT	-		SAE1|10055	MIMAT0000435&MI0000459&hsa-miR-143-3p&offsets|0|-2|TGAGATGAAGCACTGTAGC	-		-	-	-
-	-	-		C11orf75|56935	MIMAT0004927&MI0005543&hsa-miR-708-3p&offsets|+1|+1|AACTAGACTGTGAGCTTCTAGA	-		COMMD5|28991	MIMAT0000078&MI0000079&hsa-miR-23a-3p&offsets|+1|0|TCACATTGCCAGGGATTTCC	-		-	-	-
-	-	-		PSMC2|5701	MIMAT0004549&MI0000253&hsa-miR-148a-5p&offsets|-1|-2|CAAAGTTCTGAGACACTCCGA	-		DUS1L|64118	MIMAT0004601&MI0000461&hsa-miR-145-3p&offsets|0|-1|GGATTCCTGGAAATACTGTTC	-		-	-	-
-	-	-		GPR89A|653519	MIMAT0004809&MI0003642&hsa-miR-628-5p&offsets|+1|0|TGCTGACATATTTACTAGAGG	-		SH3BGRL3|83442	MIMAT0004597&MI0000456&hsa-miR-140-3p&offsets|+1|+3|ACCACAGGGTAGAACCACGGACA	-		-	-	-
-	-	-		NOL10|79954	MIMAT0000414&MI0000433&hsa-let-7g-5p&offsets|0|+1|TGAGGTAGTAGTTTGTACAGTTT	-		DTX2|113878	MIMAT0000435&MI0000459&hsa-miR-143-3p&offsets|+3|-1|GATGAAGCACTGTAGCT	-		-	-	-
-	-	-		ZSWIM4|65249	MIMAT0000227&MI0000239&hsa-miR-197-3p&offsets|0|0|TTCACCACCTTCTCCACCCAGC	-		SCAND1|51282	MIMAT0000088&MI0000088&hsa-miR-30a-3p&offsets|+1|0|TTTCAGTCGGATGTTTGCAGC	-		-	-	-
-	-	-		CYCS|54205	MIMAT0001343&MI0001448&hsa-miR-425-3p&offsets|-1|-1|CATCGGGAATGTCGTGTCCGCC	-		HSD17B10|3028	MIMAT0000763&MI0000814&hsa-miR-338-3p&offsets|0|-2|TCCAGCATCAGTGATTTTGT	-		-	-	-
-	-	-		C11orf48|79081	MIMAT0002174&MI0002468&hsa-miR-484&offsets|0|-1|TCAGGCTCAGTCCCCTCCCGA	-		IFI30|10437	MIMAT0000232&MI0000281&hsa-miR-199a-3p&offsets|0|-4,MIMAT0000232&MI0000242&hsa-miR-199a-3p&offsets|0|-4,MIMAT0004563&MI0000282&hsa-miR-199b-3p&offsets|0|-4|ACAGTAGTCTGCACATTG	-		-	-	-
-	-	-		ZMYND19|116225	MIMAT0000084&MI0000085&hsa-miR-27a-3p&offsets|0|0|TTCACAGTGGCTAAGTTCCGC	-		MEN1|4221	MIMAT0000063&MI0000063&hsa-let-7b-5p&offsets|+1|+1|GAGGTAGTAGGTTGTGTGGTTT	-		-	-	-
-	-	-		SLC19A1|6573	MIMAT0001340&MI0001445&hsa-miR-423-3p&offsets|-1|-2|AAGCTCGGTCTGAGGCCCCTCA	-		ABHD12|26090	MIMAT0000077&MI0000078&hsa-miR-22-3p&offsets|+1|-2|AGCTGCCAGTTGAAGAACT	-		-	-	-
-	-	-		CLN6|54982	MIMAT0000447&MI0000474&hsa-miR-134-5p&offsets|0|-3|TGTGACTGGTTGACCAGAG	-		SUV39H1|6839	MIMAT0000253&MI0000266&hsa-miR-10a-5p&offsets|-1|-1|ATACCCTGTAGATCCGAATTTGT	-		-	-	-
-	-	-		CTSL2|1515	MIMAT0003389&MI0003686&hsa-miR-542-3p&offsets|-1|0|TTGTGACAGATTGATAACTGAAA	-		NDUFB2|4708	MIMAT0003393&MI0001448&hsa-miR-425-5p&offsets|+1|0|ATGACACGATCACTCCCGTTGA	-		-	-	-
-	-	-		PGAM5|192111	MIMAT0004604&MI0000472&hsa-miR-127-5p&offsets|0|-2|CTGAAGCTCAGAGGGCTCTG	-		GTF2H4|2968	MIMAT0000689&MI0000746&hsa-miR-99b-5p&offsets|0|-3|CACCCGTAGAACCGACCTT	-		-	-	-
-	-	-		TOMM6|100188893	MIMAT0004502&MI0000086&hsa-miR-28-3p&offsets|+2|-1|CTAGATTGTGAGCTCCTGG	-		EIF5AL1|143244	MIMAT0000693&MI0000749&hsa-miR-30e-3p&offsets|0|-3|CTTTCAGTCGGATGTTTAC	-		-	-	-
-	-	-		UQCRH|7388	MIMAT0002174&MI0002468&hsa-miR-484&offsets|0|-2|TCAGGCTCAGTCCCCTCCCG	-		DHX34|9704	MIMAT0000693&MI0000749&hsa-miR-30e-3p&offsets|0|+1|CTTTCAGTCGGATGTTTACAGCG	-		-	-	-
-	-	-		PPIL1|51645	MIMAT0000244&MI0000736&hsa-miR-30c-5p&offsets|0|+1,MIMAT0000244&MI0000254&hsa-miR-30c-5p&offsets|0|+1|TGTAAACATCCTACACTCTCAGCT	-		BOLA1|51027	MIMAT0000418&MI0000439&hsa-miR-23b-3p&offsets|+1|+1|TCACATTGCCAGGGATTACCA	-		-	-	-
-	-	-		YIPF2|78992	MIMAT0000245&MI0000255&hsa-miR-30d-5p&offsets|0|+2|TGTAAACATCCCCGACTGGAAGCT	-		MED25|81857	MIMAT0004604&MI0000472&hsa-miR-127-5p&offsets|0|-1|CTGAAGCTCAGAGGGCTCTGA	-		-	-	-
-	-	-		ATF5|22809	MIMAT0004672&MI0000734&hsa-miR-106b-3p&offsets|0|-3|CCGCACTGTGGGTACTTGC	-		GARS|2617	MIMAT0004597&MI0000456&hsa-miR-140-3p&offsets|+4|+6|ACAGGGTAGAACCACGGACAGGA	-		-	-	-
-	-	-		CRELD2|79174	MIMAT0004558&MI0000269&hsa-miR-181a-2-3p&offsets|0|-3|ACCACTGACCGTTGACTGT	-		ACBD6|84320	MIMAT0000689&MI0000746&hsa-miR-99b-5p&offsets|0|-5|CACCCGTAGAACCGACC	-		-	-	-
-	-	-		PSMD12|5718	MIMAT0004688&MI0000782&hsa-miR-374a-3p&offsets|0|-3|CTTATCAGATTGTATTGTA	-		APOO|79135	MIMAT0000087&MI0000088&hsa-miR-30a-5p&offsets|0|-4|TGTAAACATCCTCGACTG	-		-	-	-
-	-	-		BRIX1|55299	MIMAT0004553&MI0000263&hsa-miR-7-1-3p&offsets|0|-1|CAACAAATCACAGTCTGCCAT	-		EPCAM|4072	MIMAT0000445&MI0000471&hsa-miR-126-3p&offsets|+1|-2|CGTACCGTGAGTAATAATG	-		-	-	-
-	-	-		POLR2D|5433	MIMAT0003389&MI0003686&hsa-miR-542-3p&offsets|-1|-2|TTGTGACAGATTGATAACTGA	-		SRM|6723	MIMAT0000510&MI0000542&hsa-miR-320a&offsets|-1|0|GAAAAGCTGGGTTGAGAGGGCGA	-		-	-	-
-	-	-		MYBL1|4603	MIMAT0003886&MI0003834&hsa-miR-769-5p&offsets|0|0|TGAGACCTCTGGGTTCTGAGCT	-		HDGFRP2|84717	MIMAT0004766&MI0003129&hsa-miR-146b-3p&offsets|+1|0|GCCCTGTGGACTCAGTTCTGG	-		-	-	-
-	-	-		C6orf108|10591	MIMAT0000078&MI0000079&hsa-miR-23a-3p&offsets|+2|0|CACATTGCCAGGGATTTCC	-		SNRPG|6637	MIMAT0000099&MI0000103&hsa-miR-101-3p&offsets|+1|-1,MIMAT0000099&MI0000739&hsa-miR-101-3p&offsets|+1|-1|ACAGTACTGTGATAACTGA	-		-	-	-
-	-	-		PYGO2|90780	MIMAT0003886&MI0003834&hsa-miR-769-5p&offsets|0|-1|TGAGACCTCTGGGTTCTGAGC	-		NCAPH2|29781	MIMAT0000693&MI0000749&hsa-miR-30e-3p&offsets|0|-4|CTTTCAGTCGGATGTTTA	-		-	-	-
-	-	-		SSX2IP|117178	MIMAT0000078&MI0000079&hsa-miR-23a-3p&offsets|+1|-1|TCACATTGCCAGGGATTTC	-		TMEM147|10430	MIMAT0000063&MI0000063&hsa-let-7b-5p&offsets|0|+1|TGAGGTAGTAGGTTGTGTGGTTT	-		-	-	-
-	-	-		SSBP1|6742	MIMAT0000099&MI0000103&hsa-miR-101-3p&offsets|+2|-1,MIMAT0000099&MI0000739&hsa-miR-101-3p&offsets|+2|-1|CAGTACTGTGATAACTGA	-		SH3GL1|6455	MIMAT0000253&MI0000266&hsa-miR-10a-5p&offsets|0|+1|TACCCTGTAGATCCGAATTTGTGT	-		-	-	-
-	-	-		SNX22|79856	MIMAT0000069&MI0000070&hsa-miR-16-5p&offsets|+5|0,MIMAT0000069&MI0000115&hsa-miR-16-5p&offsets|+5|0|GCACGTAAATATTGGCG	-		FXYD5|53827	MIMAT0000693&MI0000749&hsa-miR-30e-3p&offsets|0|-5,MIMAT0000088&MI0000088&hsa-miR-30a-3p&offsets|0|-5|CTTTCAGTCGGATGTTT	-		-	-	-
-	-	-		GTF2IRD1|9569	MIMAT0000432&MI0000457&hsa-miR-141-3p&offsets|0|-3|TAACACTGTCTGGTAAAGA	-		MARS|4141	MIMAT0000082&MI0000750&hsa-miR-26a-5p&offsets|0|0,MIMAT0000082&MI0000083&hsa-miR-26a-5p&offsets|0|0|TTCAAGTAATCCAGGATAGGCT	-		-	-	-
-	-	-		TFDP1|7027	MIMAT0000264&MI0000283&hsa-miR-203a&offsets|+1|+1|TGAAATGTTTAGGACCACTAGA	-		CXCL10|3627	MIMAT0000082&MI0000750&hsa-miR-26a-5p&offsets|0|-1,MIMAT0000082&MI0000083&hsa-miR-26a-5p&offsets|0|-1|TTCAAGTAATCCAGGATAGGC	-		-	-	-
-	-	-		HSPD1|3329	MIMAT0000279&MI0000299&hsa-miR-222-3p&offsets|0|+1|AGCTACATCTGGCTACTGGGTC	-		RBM42|79171	MI0000469&hsa-mir-125a&coords|19|+|52196502|52196520|CATGTTGCCAGTCTCTAGG	-		-	-	-
-	-	-		TTLL4|9654	MIMAT0000092&MI0000093&hsa-miR-92a-3p&offsets|+1|0,MIMAT0000092&MI0000094&hsa-miR-92a-3p&offsets|+1|0|ATTGCACTTGTCCCGGCCTGT	-		SART1|9092	MIMAT0003393&MI0001448&hsa-miR-425-5p&offsets|+2|+2|TGACACGATCACTCCCGTTGAGT	-		-	-	-
-	-	-		PDCL3|79031	MIMAT0000278&MI0000298&hsa-miR-221-3p&offsets|0|-2|AGCTACATTGTCTGCTGGGTT	-		EHMT2|10919	MIMAT0004499&MI0000083&hsa-miR-26a-1-3p&offsets|0|0|CCTATTCTTGGTTACTTGCACG	-		-	-	-
-	-	-		NCS1|23413	MIMAT0001080&MI0001150&hsa-miR-196b-5p&offsets|0|-1|TAGGTAGTTTCCTGTTGTTGG	-		SPP1|6696	MIMAT0000062&MI0000061&hsa-let-7a-5p&offsets|0|-1,MIMAT0000062&MI0000062&hsa-let-7a-5p&offsets|0|-1,MIMAT0000062&MI0000060&hsa-let-7a-5p&offsets|0|-1|TGAGGTAGTAGGTTGTATAGT	-		-	-	-
-	-	-		PTMA|5757	MIMAT0004484&MI0000065&hsa-let-7d-3p&offsets|0|0|CTATACGACCTGCTGCCTTTCT	-		SCYL1|57410	MIMAT0000098&MI0000102&hsa-miR-100-5p&offsets|0|+1|AACCCGTAGATCCGAACTTGTGG	-		-	-	-
-	-	-		PSENEN|55851	MIMAT0004694&MI0000805&hsa-miR-342-5p&offsets|0|+1|AGGGGTGCTATCTGTGATTGAG	-		LSM14B|149986	MIMAT0000086&MI0000087&hsa-miR-29a-3p&offsets|0|+1|TAGCACCATCTGAAATCGGTTAT	-		-	-	-
-	-	-		CXCL9|4283	MIMAT0004558&MI0000269&hsa-miR-181a-2-3p&offsets|+1|0|CCACTGACCGTTGACTGTACC	-		MLF2|8079	MIMAT0001638&MI0001735&hsa-miR-409-5p&offsets|0|-2|AGGTTACCCGAGCAACTTTGC	-		-	-	-
-	-	-		CPSF3|51692	MIMAT0000420&MI0000441&hsa-miR-30b-5p&offsets|0|-2|TGTAAACATCCTACACTCAG	-		PPM1G|5496	MIMAT0000693&MI0000749&hsa-miR-30e-3p&offsets|0|-1|CTTTCAGTCGGATGTTTACAG	-		-	-	-
-	-	-		HNRNPA2B1|3181	MIMAT0004558&MI0000269&hsa-miR-181a-2-3p&offsets|-1|-1|AACCACTGACCGTTGACTGTAC	-		ABCC10|89845	MIMAT0018073&MI0016053&hsa-miR-3653&offsets|-2|0|CTCTAAGAAGTTGACTGAAG	-		-	-	-
-	-	-		GMDS|2762	MIMAT0000264&MI0000283&hsa-miR-203a&offsets|0|+1|GTGAAATGTTTAGGACCACTAGA	-		VKORC1|79001	MIMAT0000438&MI0000462&hsa-miR-152-3p&offsets|0|+1|TCAGTGCATGACAGAACTTGGG	-		-	-	-
-	-	-		PPIB|5479	MIMAT0000256&MI0000289&hsa-miR-181a-5p&offsets|+1|-1,MIMAT0000256&MI0000269&hsa-miR-181a-5p&offsets|+1|-1|ACATTCAACGCTGTCGGTGAG	-		APH1A|51107	MIMAT0000062&MI0000060&hsa-let-7a-5p&offsets|-1|-1|ATGAGGTAGTAGGTTGTATAGT	-		-	-	-
-	-	-		FTSJ1|24140	MIMAT0000441&MI0000466&hsa-miR-9-5p&offsets|+2|0,MIMAT0000441&MI0000468&hsa-miR-9-5p&offsets|+2|0,MIMAT0000441&MI0000467&hsa-miR-9-5p&offsets|+2|0|TTTGGTTATCTAGCTGTATGA	-		YKT6|10652	MIMAT0000087&MI0000088&hsa-miR-30a-5p&offsets|0|0|TGTAAACATCCTCGACTGGAAG	-		-	-	-
-	-	-		PSME2|5721	MIMAT0001545&MI0001652&hsa-miR-450a-5p&offsets|0|-2,MIMAT0001545&MI0003187&hsa-miR-450a-5p&offsets|0|-2|TTTTGCGATGTGTTCCTAAT	-		UNC93B1|81622	MIMAT0003393&MI0001448&hsa-miR-425-5p&offsets|+1|-1|ATGACACGATCACTCCCGTTG	-		-	-	-
-	-	-		TXNDC17|84817	MIMAT0000707&MI0000764&hsa-miR-363-3p&offsets|0|0|AATTGCACGGTATCCATCTGTA	-		PSMC3|5702	MIMAT0000063&MI0000063&hsa-let-7b-5p&offsets|0|-4|TGAGGTAGTAGGTTGTGT	-		-	-	-
-	-	-		PDAP1|11333	MIMAT0000101&MI0000108&hsa-miR-103a-3p&offsets|0|-1,MIMAT0000101&MI0000109&hsa-miR-103a-3p&offsets|0|-1|AGCAGCATTGTACAGGGCTATG	-		MRPS5|64969	MIMAT0004614&MI0000487&hsa-miR-193a-5p&offsets|0|0|TGGGTCTTTGCGGGCGAGATGA	-		-	-	-
-	-	-		TIPRL|261726	MIMAT0004597&MI0000456&hsa-miR-140-3p&offsets|+1|-1|ACCACAGGGTAGAACCACG	-		VARS2|57176	MIMAT0000082&MI0000750&hsa-miR-26a-5p&offsets|+5|0,MIMAT0000082&MI0000083&hsa-miR-26a-5p&offsets|+5|0|GTAATCCAGGATAGGCT	-		-	-	-
-	-	-		MED8|112950	MIMAT0001080&MI0001150&hsa-miR-196b-5p&offsets|0|0|TAGGTAGTTTCCTGTTGTTGGG	-		PSMC4|5704	MIMAT0000280&MI0000300&hsa-miR-223-3p&offsets|0|+1|TGTCAGTTTGTCAAATACCCCAA	-		-	-	-
-	-	-		PTS|5805	MIMAT0000232&MI0000281&hsa-miR-199a-3p&offsets|+1|-2,MIMAT0000232&MI0000242&hsa-miR-199a-3p&offsets|+1|-2,MIMAT0004563&MI0000282&hsa-miR-199b-3p&offsets|+1|-2|CAGTAGTCTGCACATTGGT	-		POLR3K|51728	MIMAT0000231&MI0000281&hsa-miR-199a-5p&offsets|+1|0,MIMAT0000231&MI0000242&hsa-miR-199a-5p&offsets|+1|0|CCAGTGTTCAGACTACCTGTTC	-		-	-	-
-	-	-		PRELID1|27166	MIMAT0004497&MI0000081&hsa-miR-24-2-5p&offsets|-1|-1|GTGCCTACTGAGCTGAAACACA	-		NAA10|8260	MIMAT0000253&MI0000266&hsa-miR-10a-5p&offsets|+1|0|ACCCTGTAGATCCGAATTTGTG	-		-	-	-
-	-	-		EN1|2019	TJU_CMC_MD2.ID02736.5p-miR&MI0000109&hsa-mir-103a-1&offsets|0|0|GGCTTCTTTACAGTGCTGCCTTG	-		APOBEC3B|9582	MIMAT0000244&MI0000736&hsa-miR-30c-5p&offsets|0|-4,MIMAT0000244&MI0000254&hsa-miR-30c-5p&offsets|0|-4|TGTAAACATCCTACACTCT	-		-	-	-
-	-	-		SNRPD3|6634	MIMAT0000080&MI0000081&hsa-miR-24-3p&offsets|+1|-2,MIMAT0000080&MI0000080&hsa-miR-24-3p&offsets|+1|-2|GGCTCAGTTCAGCAGGAAC	-		AIMP2|7965	MIMAT0004500&MI0000084&hsa-miR-26b-3p&offsets|0|-1|CCTGTTCTCCATTACTTGGCT	-		-	-	-
-	-	-		PSMB5|5693	MIMAT0000062&MI0000061&hsa-let-7a-5p&offsets|+1|0,MIMAT0000062&MI0000062&hsa-let-7a-5p&offsets|+1|0,MIMAT0000062&MI0000060&hsa-let-7a-5p&offsets|+1|0|GAGGTAGTAGGTTGTATAGTT	-		BSG|682	MIMAT0000086&MI0000087&hsa-miR-29a-3p&offsets|-1|-3|CTAGCACCATCTGAAATCGG	-		-	-	-
-	-	-		DHTKD1|55526	MIMAT0000727&MI0000782&hsa-miR-374a-5p&offsets|0|0|TTATAATACAACCTGATAAGTG	-		RCN3|57333	MIMAT0003393&MI0001448&hsa-miR-425-5p&offsets|+2|+1|TGACACGATCACTCCCGTTGAG	-		-	-	-
-	-	-		RPN2|6185	MIMAT0000092&MI0000093&hsa-miR-92a-3p&offsets|+2|0,MIMAT0000092&MI0000094&hsa-miR-92a-3p&offsets|+2|0|TTGCACTTGTCCCGGCCTGT	-		CPSF1|29894	MIMAT0004955&MI0005566&hsa-miR-374b-5p&offsets|0|-1|ATATAATACAACCTGCTAAGT	-		-	-	-
-	-	-		CIAPIN1|57019	MIMAT0000510&MI0000542&hsa-miR-320a&offsets|+1|0|AAAGCTGGGTTGAGAGGGCGA	-		PNKD|25953	MIMAT0003239&MI0003581&hsa-miR-574-3p&offsets|0|-1|CACGCTCATGCACACACCCAC	-		-	-	-
-	-	-		RNPS1|10921	MIMAT0004558&MI0000269&hsa-miR-181a-2-3p&offsets|0|+1|ACCACTGACCGTTGACTGTACCT	-		RPN1|6184	MIMAT0000245&MI0000255&hsa-miR-30d-5p&offsets|+1|0|GTAAACATCCCCGACTGGAAG	-		-	-	-
-	-	-		NUP85|79902	MIMAT0000065&MI0000065&hsa-let-7d-5p&offsets|0|-2|AGAGGTAGTAGGTTGCATAG	-		BAT3|7917	MIMAT0000232&MI0000281&hsa-miR-199a-3p&offsets|+1|0,MIMAT0000232&MI0000242&hsa-miR-199a-3p&offsets|+1|0,MIMAT0004563&MI0000282&hsa-miR-199b-3p&offsets|+1|0|CAGTAGTCTGCACATTGGTTA	-		-	-	-
-	-	-		WDR12|55759	MIMAT0005878&MI0006349&hsa-miR-1287-5p&offsets|0|-2|TGCTGGATCAGTGGTTCGAG	-		PTS|5805	MIMAT0000275&MI0000294&hsa-miR-218-5p&offsets|0|+1,MIMAT0000275&MI0000295&hsa-miR-218-5p&offsets|0|+1|TTGTGCTTGATCTAACCATGTG	-		-	-	-
-	-	-		ART3|419	MIMAT0005825&MI0006273&hsa-miR-1180-3p&offsets|0|0|TTTCCGGCTCGCGTGGGTGTGT	-		ISG15|9636	MIMAT0004911&MI0005532&hsa-miR-874-3p&offsets|0|0|CTGCCCTGGCCCGAGGGACCGA	-		-	-	-
-	-	-		SMC6|79677	MIMAT0000256&MI0000289&hsa-miR-181a-5p&offsets|0|-4,MIMAT0000256&MI0000269&hsa-miR-181a-5p&offsets|0|-4|AACATTCAACGCTGTCGGT	-		CRELD2|79174	MIMAT0000232&MI0000281&hsa-miR-199a-3p&offsets|0|-3,MIMAT0000232&MI0000242&hsa-miR-199a-3p&offsets|0|-3,MIMAT0004563&MI0000282&hsa-miR-199b-3p&offsets|0|-3|ACAGTAGTCTGCACATTGG	-		-	-	-
-	-	-		?|10431	MIMAT0004604&MI0000472&hsa-miR-127-5p&offsets|0|+1|CTGAAGCTCAGAGGGCTCTGATT	-		OTUB1|55611	MIMAT0000086&MI0000087&hsa-miR-29a-3p&offsets|+1|-1|AGCACCATCTGAAATCGGTT	-		-	-	-
-	-	-		USP39|10713	MIMAT0004495&MI0000078&hsa-miR-22-5p&offsets|0|0|AGTTCTTCAGTGGCAAGCTTTA	-		OBFC2B|79035	MIMAT0000318&MI0000342&hsa-miR-200b-3p&offsets|0|-3|TAATACTGCCTGGTAATGA	-		-	-	-
-	-	-		WHSC1|7468	MIMAT0000101&MI0000108&hsa-miR-103a-3p&offsets|0|+1,MIMAT0000101&MI0000109&hsa-miR-103a-3p&offsets|0|+1|AGCAGCATTGTACAGGGCTATGAA	-		XPO5|57510	MIMAT0000443&MI0000469&hsa-miR-125a-5p&offsets|0|-1|TCCCTGAGACCCTTTAACCTGTG	-		-	-	-
-	-	-		SAE1|10055	MIMAT0000417&MI0000438&hsa-miR-15b-5p&offsets|0|-3|TAGCAGCACATCATGGTTT	-		RBM28|55131	MIMAT0000062&MI0000061&hsa-let-7a-5p&offsets|0|-3,MIMAT0000062&MI0000062&hsa-let-7a-5p&offsets|0|-3,MIMAT0000062&MI0000060&hsa-let-7a-5p&offsets|0|-3|TGAGGTAGTAGGTTGTATA	-		-	-	-
-	-	-		EPRS|2058	MIMAT0004766&MI0003129&hsa-miR-146b-3p&offsets|0|+1|TGCCCTGTGGACTCAGTTCTGGT	-		YARS|8565	MIMAT0000425&MI0000448&hsa-miR-130a-3p&offsets|0|-1|CAGTGCAATGTTAAAAGGGCA	-		-	-	-
-	-	-		TOMM5|401505	MIMAT0000081&MI0000082&hsa-miR-25-3p&offsets|0|-6|CATTGCACTTGTCTCG	-		RRP12|23223	MIMAT0000253&MI0000266&hsa-miR-10a-5p&offsets|-1|-2|ATACCCTGTAGATCCGAATTTG	-		-	-	-
-	-	-		PDIA3|2923	MIMAT0004558&MI0000269&hsa-miR-181a-2-3p&offsets|0|0|ACCACTGACCGTTGACTGTACC	-		NUP93|9688	MIMAT0000253&MI0000266&hsa-miR-10a-5p&offsets|+2|+1|CCCTGTAGATCCGAATTTGTGT	-		-	-	-
-	-	-		TTLL12|23170	MIMAT0004809&MI0003642&hsa-miR-628-5p&offsets|0|0|ATGCTGACATATTTACTAGAGG	-		PARP1|142	MIMAT0000435&MI0000459&hsa-miR-143-3p&offsets|0|-4|TGAGATGAAGCACTGTA	-		-	-	-
-	-	-		PSMD11|5717	MIMAT0000069&MI0000070&hsa-miR-16-5p&offsets|0|-2,MIMAT0000069&MI0000115&hsa-miR-16-5p&offsets|0|-2|TAGCAGCACGTAAATATTGG	-		TMED9|54732	MIMAT0000244&MI0000736&hsa-miR-30c-5p&offsets|0|-5,MIMAT0000244&MI0000254&hsa-miR-30c-5p&offsets|0|-5,MIMAT0000420&MI0000441&hsa-miR-30b-5p&offsets|0|-4|TGTAAACATCCTACACTC	-		-	-	-
-	-	-		FADS2|9415	MIMAT0000232&MI0000281&hsa-miR-199a-3p&offsets|+3|-1,MIMAT0000232&MI0000242&hsa-miR-199a-3p&offsets|+3|-1,MIMAT0004563&MI0000282&hsa-miR-199b-3p&offsets|+3|-1|GTAGTCTGCACATTGGTT	-		MRPL37|51253	MIMAT0000245&MI0000255&hsa-miR-30d-5p&offsets|0|-1|TGTAAACATCCCCGACTGGAA	-		-	-	-
-	-	-		FAM57A|79850	MIMAT0000062&MI0000061&hsa-let-7a-5p&offsets|+3|0,MIMAT0000062&MI0000062&hsa-let-7a-5p&offsets|+3|0,MIMAT0000062&MI0000060&hsa-let-7a-5p&offsets|+3|0|GGTAGTAGGTTGTATAGTT	-		DCUN1D5|84259	MIMAT0000253&MI0000266&hsa-miR-10a-5p&offsets|+2|0|CCCTGTAGATCCGAATTTGTG	-		-	-	-
-	-	-		PPPDE1|51029	MIMAT0000280&MI0000300&hsa-miR-223-3p&offsets|0|-2|TGTCAGTTTGTCAAATACCC	-		SNRPA|6626	MIMAT0000681&MI0000735&hsa-miR-29c-3p&offsets|0|0|TAGCACCATTTGAAATCGGTTA	-		-	-	-
-	-	-		MTP18|51537	MIMAT0000703&MI0000760&hsa-miR-361-5p&offsets|0|-1|TTATCAGAATCTCCAGGGGTA	-		PSAT1|29968	MIMAT0000099&MI0000739&hsa-miR-101-3p&offsets|0|+2|TACAGTACTGTGATAACTGAAGA	-		-	-	-
-	-	-		RNF187|149603	MIMAT0004748&MI0001445&hsa-miR-423-5p&offsets|0|-4|TGAGGGGCAGAGAGCGAGA	-		DNASE2|1777	MIMAT0000728&MI0000783&hsa-miR-375&offsets|0|-3|TTTGTTCGTTCGGCTCGCG	-		-	-	-
-	-	-		KCNK5|8645	MIMAT0003389&MI0003686&hsa-miR-542-3p&offsets|0|-1|TGTGACAGATTGATAACTGAA	-		GTPBP4|23560	MIMAT0000231&MI0000281&hsa-miR-199a-5p&offsets|0|+1,MIMAT0000231&MI0000242&hsa-miR-199a-5p&offsets|0|+1|CCCAGTGTTCAGACTACCTGTTCA	-		-	-	-
-	-	-		ABTB2|25841	MIMAT0004672&MI0000734&hsa-miR-106b-3p&offsets|0|-2|CCGCACTGTGGGTACTTGCT	-		PLEKHO1|51177	MIMAT0004615&MI0000489&hsa-miR-195-3p&offsets|0|+1|CCAATATTGGCTGTGCTGCTCCA	-		-	-	-
-	-	-		NVL|4931	MIMAT0000062&MI0000060&hsa-let-7a-5p&offsets|0|+2|TGAGGTAGTAGGTTGTATAGTTTT	-		CCDC9|26093	MIMAT0000082&MI0000750&hsa-miR-26a-5p&offsets|+5|-1,MIMAT0000082&MI0000083&hsa-miR-26a-5p&offsets|+5|-1|GTAATCCAGGATAGGC	-		-	-	-
-	-	-		MYO10|4651	MIMAT0000258&MI0000271&hsa-miR-181c-5p&offsets|0|0|AACATTCAACCTGTCGGTGAGT	-		TMEM208|29100	MIMAT0000435&MI0000459&hsa-miR-143-3p&offsets|+3|0|GATGAAGCACTGTAGCTC	-		-	-	-
-	-	-		SLBP|7884	MIMAT0004797&MI0003589&hsa-miR-582-3p&offsets|+1|+1|AACTGGTTGAACAACTGAACCC	-		TMEM8A|58986	MIMAT0000693&MI0000749&hsa-miR-30e-3p&offsets|0|-6,MIMAT0000088&MI0000088&hsa-miR-30a-3p&offsets|0|-6|CTTTCAGTCGGATGTT	-		-	-	-
-	-	-		AMMECR1|9949	MIMAT0004586&MI0000438&hsa-miR-15b-3p&offsets|0|-3|CGAATCATTATTTGCTGCT	-		HSPBP1|23640	MIMAT0000435&MI0000459&hsa-miR-143-3p&offsets|-1|-1|CTGAGATGAAGCACTGTAGCT	-		-	-	-
-	-	-		GSK3A|2931	MIMAT0000455&MI0000482&hsa-miR-185-5p&offsets|0|-1|TGGAGAGAAAGGCAGTTCCTG	-		PTK7|5754	MIMAT0002808&MI0003127&hsa-miR-511-5p&offsets|0|+1,MIMAT0002808&MI0003127&hsa-miR-511-5p&offsets|0|+1|GTGTCTTTTGCTCTGCAGTCAG	-		-	-	-
-	-	-		TRAF7|84231	MIMAT0004945&MI0005559&hsa-miR-744-5p&offsets|0|-2|TGCGGGGCTAGGGCTAACAG	-		LOC152217|152217	MIMAT0004911&MI0005532&hsa-miR-874-3p&offsets|0|+2|CTGCCCTGGCCCGAGGGACCGACT	-		-	-	-
-	-	-		SMARCA4|6597	MIMAT0009451&MI0009986&hsa-miR-1976&offsets|0|+2|CCTCCTGCCCTCCTTGCTGTAG	-		PPP1R16A|84988	MIMAT0000231&MI0000281&hsa-miR-199a-5p&offsets|0|-2,MIMAT0000231&MI0000242&hsa-miR-199a-5p&offsets|0|-2|CCCAGTGTTCAGACTACCTGT	-		-	-	-
-	-	-		PUF60|22827	MIMAT0000703&MI0000760&hsa-miR-361-5p&offsets|0|-5|TTATCAGAATCTCCAGG	-		WDR77|79084	MIMAT0000063&MI0000063&hsa-let-7b-5p&offsets|+1|-1|GAGGTAGTAGGTTGTGTGGT	-		-	-	-
-	-	-		PSPH|5723	MIMAT0000689&MI0000746&hsa-miR-99b-5p&offsets|0|+1|CACCCGTAGAACCGACCTTGCGG	-		UFC1|51506	MIMAT0001635&MI0001733&hsa-miR-452-5p&offsets|0|0|AACTGTTTGCAGAGGAAACTGA	-		-	-	-
-	-	-		DYNLT1|6993	MIMAT0000705&MI0000762&hsa-miR-362-5p&offsets|0|0|AATCCTTGGAACCTAGGTGTGAGT	-		C9orf30|91283	MIMAT0004673&MI0000735&hsa-miR-29c-5p&offsets|+2|+2|ACCGATTTCTCCTGGTGTTCAG	-		-	-	-
-	-	-		SSR2|6746	MIMAT0004688&MI0000782&hsa-miR-374a-3p&offsets|0|-1|CTTATCAGATTGTATTGTAAT	-		CDC34|997	MIMAT0000728&MI0000783&hsa-miR-375&offsets|0|+1|TTTGTTCGTTCGGCTCGCGTGAG	-		-	-	-
-	-	-		RBM8A|9939	MIMAT0000728&MI0000783&hsa-miR-375&offsets|0|-3|TTTGTTCGTTCGGCTCGCG	-		PRAME|23532	MIMAT0004682&MI0000760&hsa-miR-361-3p&offsets|+1|+1|CCCCCAGGTGTGATTCTGATTTG	-		-	-	-
-	-	-		FDPS|2224	MIMAT0004927&MI0005543&hsa-miR-708-3p&offsets|+1|0|AACTAGACTGTGAGCTTCTAG	-		MRPS26|64949	MIMAT0000086&MI0000087&hsa-miR-29a-3p&offsets|0|-1|TAGCACCATCTGAAATCGGTT	-		-	-	-
-	-	-		SFPQ|6421	MIMAT0000232&MI0000281&hsa-miR-199a-3p&offsets|0|-2,MIMAT0000232&MI0000242&hsa-miR-199a-3p&offsets|0|-2,MIMAT0004563&MI0000282&hsa-miR-199b-3p&offsets|0|-2|ACAGTAGTCTGCACATTGGT	-		NDUFS6|4726	MIMAT0002807&MI0003126&hsa-miR-491-5p&offsets|0|0|AGTGGGGAACCCTTCCATGAGG	-		-	-	-
-	-	-		MTFR1|9650	MIMAT0000753&MI0000805&hsa-miR-342-3p&offsets|+2|+1|TCACACAGAAATCGCACCCGTC	-		CHMP1A|5119	MIMAT0000099&MI0000103&hsa-miR-101-3p&offsets|-1|-3,MIMAT0000099&MI0000739&hsa-miR-101-3p&offsets|-1|-3|GTACAGTACTGTGATAACT	-		-	-	-
-	-	-		GNG5|2787	MIMAT0005878&MI0006349&hsa-miR-1287-5p&offsets|0|-1|TGCTGGATCAGTGGTTCGAGT	-		SHARPIN|81858	MIMAT0000087&MI0000088&hsa-miR-30a-5p&offsets|0|-1|TGTAAACATCCTCGACTGGAA	-		-	-	-
-	-	-		CCDC137|339230	MIMAT0002174&MI0002468&hsa-miR-484&offsets|0|+1|TCAGGCTCAGTCCCCTCCCGATA	-		ISOC2|79763	MIMAT0026480&MI0000464&hsa-miR-153-5p&offsets|-1|-2|GTCATTTTTGTGATGTTGCAG	-		-	-	-
-	-	-		H3F3A|3020	MIMAT0003322&MI0003667&hsa-miR-652-3p&offsets|0|0|AATGGCGCCACTAGGGTTGTG	-		ABCF1|23	MIMAT0003393&MI0001448&hsa-miR-425-5p&offsets|+2|0|TGACACGATCACTCCCGTTGA	-		-	-	-
-	-	-		FSCN1|6624	MIMAT0000104&MI0000114&hsa-miR-107&offsets|0|-4,MIMAT0000101&MI0000108&hsa-miR-103a-3p&offsets|0|-4,MIMAT0000101&MI0000109&hsa-miR-103a-3p&offsets|0|-4|AGCAGCATTGTACAGGGCT	-		NR2F6|2063	MIMAT0000459&MI0000487&hsa-miR-193a-3p&offsets|0|-2|AACTGGCCTACAAAGTCCCA	-		-	-	-
-	-	-		HSD17B10|3028	MIMAT0000689&MI0000746&hsa-miR-99b-5p&offsets|0|-1|CACCCGTAGAACCGACCTTGC	-		PTBP1|5725	-	-		-	-	-
-	-	-		PTK7|5754	MIMAT0000418&MI0000439&hsa-miR-23b-3p&offsets|0|-2|ATCACATTGCCAGGGATTA	-		SLC3A2|6520	-	-		-	-	-
-	-	-		SBK1|388228	MIMAT0001340&MI0001445&hsa-miR-423-3p&offsets|-1|0|AAGCTCGGTCTGAGGCCCCTCAGT	-		ASNA1|439	-	-		-	-	-
-	-	-		UNC13D|201294	MIMAT0005920&MI0006403&hsa-miR-1266-5p&offsets|0|0|CCTCAGGGCTGTAGAACAGGGCT	-		APOE|348	-	-		-	-	-
-	-	-		TMED9|54732	MIMAT0004688&MI0000782&hsa-miR-374a-3p&offsets|0|-2|CTTATCAGATTGTATTGTAA	-		MDH2|4191	-	-		-	-	-
-	-	-		DARS2|55157	MIMAT0000419&MI0000440&hsa-miR-27b-3p&offsets|0|-2|TTCACAGTGGCTAAGTTCT	-		C19orf62|29086	-	-		-	-	-
-	-	-		ANAPC11|51529	MIMAT0004678&MI0000746&hsa-miR-99b-3p&offsets|0|+1|CAAGCTCGTGTCTGTGGGTCCGT	-		TMEM93|83460	-	-		-	-	-
-	-	-		LRRC61|65999	MIMAT0002819&MI0003137&hsa-miR-193b-3p&offsets|+1|0|ACTGGCCCTCAAAGTCCCGCT	-		PSMB3|5691	-	-		-	-	-
-	-	-		TMEM45A|55076	MIMAT0003322&MI0003667&hsa-miR-652-3p&offsets|0|-1|AATGGCGCCACTAGGGTTGT	-		CAPS|828	-	-		-	-	-
-	-	-		AIMP2|7965	MIMAT0000066&MI0000066&hsa-let-7e-5p&offsets|0|+1|TGAGGTAGGAGGTTGTATAGTTG	-		EBNA1BP2|10969	-	-		-	-	-
-	-	-		MLF2|8079	MIMAT0002876&MI0003190&hsa-miR-505-3p&offsets|+1|+2|GTCAACACTTGCTGGTTTCCTCT	-		FN1|2335	-	-		-	-	-
-	-	-		ROBLD3|28956	MIMAT0000077&MI0000078&hsa-miR-22-3p&offsets|+3|0|CTGCCAGTTGAAGAACTGT	-		PKM2|5315	-	-		-	-	-
-	-	-		C1orf106|55765	MIMAT0004672&MI0000734&hsa-miR-106b-3p&offsets|0|0|CCGCACTGTGGGTACTTGCTGC	-		ICT1|3396	-	-		-	-	-
-	-	-		ARHGAP39|80728	MIMAT0002871&MI0003184&hsa-miR-500a-3p&offsets|-1|0|AATGCACCTGGGCAAGGATTCTG	-		NOP16|51491	-	-		-	-	-
-	-	-		ST3GAL4|6484	MIMAT0000077&MI0000078&hsa-miR-22-3p&offsets|0|-2|AAGCTGCCAGTTGAAGAACT	-		PDCL3|79031	-	-		-	-	-
-	-	-		LSM7|51690	MIMAT0000456&MI0000483&hsa-miR-186-5p&offsets|0|+1|CAAAGAATTCTCCTTTTGGGCTT	-		U2AF2|11338	-	-		-	-	-
-	-	-		TUBG1|7283	MIMAT0000085&MI0000086&hsa-miR-28-5p&offsets|0|-2|AAGGAGCTCACAGTCTATTG	-		MAGOH|4116	-	-		-	-	-
-	-	-		CUTA|51596	MIMAT0000728&MI0000783&hsa-miR-375&offsets|0|-4|TTTGTTCGTTCGGCTCGC	-		MEA1|4201	-	-		-	-	-
-	-	-		FARSA|2193	MIMAT0000693&MI0000749&hsa-miR-30e-3p&offsets|+1|0|TTTCAGTCGGATGTTTACAGC	-		ASNS|440	-	-		-	-	-
-	-	-		CYC1|1537	MIMAT0000232&MI0000281&hsa-miR-199a-3p&offsets|+1|-1,MIMAT0000232&MI0000242&hsa-miR-199a-3p&offsets|+1|-1,MIMAT0004563&MI0000282&hsa-miR-199b-3p&offsets|+1|-1|CAGTAGTCTGCACATTGGTT	-		NSUN5|55695	-	-		-	-	-
-	-	-		TSSC1|7260	MIMAT0003393&MI0001448&hsa-miR-425-5p&offsets|+2|0|TGACACGATCACTCCCGTTGA	-		MEX3D|399664	-	-		-	-	-
-	-	-		C16orf88|400506	MIMAT0000448&MI0000475&hsa-miR-136-5p&offsets|0|-1|ACTCCATTTGTTTTGATGATGG	-		HM13|81502	-	-		-	-	-
-	-	-		ZBED4|9889	MIMAT0000764&MI0000815&hsa-miR-339-5p&offsets|0|-3|TCCCTGTCCTCCAGGAGCTC	-		C19orf48|84798	-	-		-	-	-
-	-	-		DCPS|28960	MIMAT0001545&MI0001652&hsa-miR-450a-5p&offsets|0|0,MIMAT0001545&MI0003187&hsa-miR-450a-5p&offsets|0|0|TTTTGCGATGTGTTCCTAATAT	-		SLC25A22|79751	-	-		-	-	-
-	-	-		HMBS|3145	MIMAT0000705&MI0000762&hsa-miR-362-5p&offsets|0|-1|AATCCTTGGAACCTAGGTGTGAG	-		CCHCR1|54535	-	-		-	-	-
-	-	-		SIRT7|51547	MIMAT0000258&MI0000271&hsa-miR-181c-5p&offsets|0|-1|AACATTCAACCTGTCGGTGAG	-		CKLF|51192	-	-		-	-	-
-	-	-		PPIA|5478	MIMAT0004502&MI0000086&hsa-miR-28-3p&offsets|0|-2|CACTAGATTGTGAGCTCCTG	-		C17orf49|124944	-	-		-	-	-
-	-	-		DCTPP1|79077	MIMAT0004703&MI0000816&hsa-miR-335-3p&offsets|0|-2|TTTTTCATTATTGCTCCTGA	-		H2AFY|9555	-	-		-	-	-
-	-	-		PDIA5|10954	MI0000085&hsa-mir-27a&coords|19|-|13947323|13947342|CTGTGCCTGGCCTGAGGAGC	-		MRPL24|79590	-	-		-	-	-
-	-	-		CHORDC1|26973	MI0000081&hsa-mir-24-2&coords|19|-|13947163|13947182|CTCCCTGGGCTCTGCCTCCC	-		NUBP2|10101	-	-		-	-	-
-	-	-		TMEM208|29100	MIMAT0000085&MI0000086&hsa-miR-28-5p&offsets|0|-1|AAGGAGCTCACAGTCTATTGA	-		PSMA5|5686	-	-		-	-	-
-	-	-		IL32|9235	MIMAT0000440&MI0000465&hsa-miR-191-5p&offsets|0|-4|CAACGGAATCCCAAAAGCA	-		DNMT1|1786	-	-		-	-	-
-	-	-		RFWD3|55159	MIMAT0000728&MI0000783&hsa-miR-375&offsets|-1|-1|TTTTGTTCGTTCGGCTCGCGTG	-		UBAP2L|9898	-	-		-	-	-
-	-	-		VANGL1|81839	MIMAT0000728&MI0000783&hsa-miR-375&offsets|-1|-3|TTTTGTTCGTTCGGCTCGCG	-		PCYT2|5833	-	-		-	-	-
-	-	-		POLR1C|9533	MIMAT0004955&MI0005566&hsa-miR-374b-5p&offsets|0|+1|ATATAATACAACCTGCTAAGTGT	-		F11R|50848	-	-		-	-	-
-	-	-		AP2M1|1173	-	-		MUS81|80198	-	-		-	-	-
-	-	-		RELB|5971	Downregulated	-		PSMD8|5714	-	-		-	-	-
-	-	-		FOXRED2|80020	MIMAT0004552&MI0000261&hsa-miR-139-3p&offsets|0|-2|TGGAGACGCGGCCCTGTTGGA	-		FAM128B|80097	-	-		-	-	-
-	-	-		ERI3|79033	MIMAT0000254&MI0000267&hsa-miR-10b-5p&offsets|+1|-1|ACCCTGTAGAACCGAATTTGT	-		CUTA|51596	-	-		-	-	-
-	-	-		CNIH4|29097	MIMAT0000250&MI0000261&hsa-miR-139-5p&offsets|0|-1|TCTACAGTGCACGTGTCTCCAG	-		RHBDD3|25807	-	-		-	-	-
-	-	-		LOC84740|84740	MIMAT0000254&MI0000267&hsa-miR-10b-5p&offsets|0|-1|TACCCTGTAGAACCGAATTTGT	-		CTSB|1508	-	-		-	-	-
-	-	-		TMEM65|157378	MIMAT0000250&MI0000261&hsa-miR-139-5p&offsets|0|-3|TCTACAGTGCACGTGTCTCC	-		RNF8|9025	-	-		-	-	-
-	-	-		MTCH2|23788	MIMAT0000250&MI0000261&hsa-miR-139-5p&offsets|0|0|TCTACAGTGCACGTGTCTCCAGT	-		TMUB1|83590	-	-		-	-	-
-	-	-		RGS10|6001	MIMAT0000250&MI0000261&hsa-miR-139-5p&offsets|0|-2|TCTACAGTGCACGTGTCTCCA	-		ZMYND19|116225	-	-		-	-	-
-	-	-		PRPS2|5634	MIMAT0000254&MI0000267&hsa-miR-10b-5p&offsets|+1|-4|ACCCTGTAGAACCGAATT	-		PTMS|5763	-	-		-	-	-
-	-	-		IFI6|2537	MIMAT0000254&MI0000267&hsa-miR-10b-5p&offsets|-1|-1|ATACCCTGTAGAACCGAATTTGT	-		P4HB|5034	-	-		-	-	-
-	-	-		KDM1A|23028	MIMAT0000254&MI0000267&hsa-miR-10b-5p&offsets|0|-2|TACCCTGTAGAACCGAATTTG	-		GPAA1|8733	-	-		-	-	-
-	-	-		CKAP5|9793	MIMAT0000254&MI0000267&hsa-miR-10b-5p&offsets|+1|0|ACCCTGTAGAACCGAATTTGTG	-		GPATCH4|54865	-	-		-	-	-
-	-	-		CALU|813	MIMAT0000254&MI0000267&hsa-miR-10b-5p&offsets|0|-3|TACCCTGTAGAACCGAATTT	-		SSSCA1|10534	-	-		-	-	-
-	-	-		MRPS17|51373	MIMAT0000254&MI0000267&hsa-miR-10b-5p&offsets|0|-5|TACCCTGTAGAACCGAAT	-		NUP62|23636	-	-		-	-	-
-	-	-		IER5L|389792	MIMAT0000254&MI0000267&hsa-miR-10b-5p&offsets|+1|+1|ACCCTGTAGAACCGAATTTGTGT	-		RASSF7|8045	-	-		-	-	-
-	-	-		MEN1|4221	MIMAT0004552&MI0000261&hsa-miR-139-3p&offsets|0|-1|TGGAGACGCGGCCCTGTTGGAG	-		PWWP2B|170394	-	-		-	-	-
-	-	-		DUS1L|64118	MIMAT0004552&MI0000261&hsa-miR-139-3p&offsets|0|0|TGGAGACGCGGCCCTGTTGGAGT	-		GTF3C6|112495	-	-		-	-	-
-	-	-		CHRAC1|54108	MIMAT0000254&MI0000267&hsa-miR-10b-5p&offsets|0|0|TACCCTGTAGAACCGAATTTGTG	-		FBN2|2201	-	-		-	-	-
-	-	-		USF1|7391	MIMAT0000254&MI0000267&hsa-miR-10b-5p&offsets|0|-4|TACCCTGTAGAACCGAATT	-		PFKP|5214	-	-		-	-	-
-	-	-		C11orf10|746	MIMAT0000437&MI0000461&hsa-miR-145-5p&offsets|0|-1|GTCCAGTTTTCCCAGGAATCCC	-		DPY30|84661	-	-		-	-	-
-	-	-		LYPLA2|11313	MIMAT0000254&MI0000267&hsa-miR-10b-5p&offsets|+1|-3|ACCCTGTAGAACCGAATTT	-		OLFM2|93145	-	-		-	-	-
-	-	-		AP2S1|1175	MIMAT0000254&MI0000267&hsa-miR-10b-5p&offsets|+1|-2|ACCCTGTAGAACCGAATTTG	-		RCE1|9986	-	-		-	-	-
-	-	-		NRM|11270	MIMAT0000435&MI0000459&hsa-miR-143-3p&offsets|0|+2|TGAGATGAAGCACTGTAGCTCAG	-		MRPL51|51258	-	-		-	-	-
-	-	-		OSTC|58505	MIMAT0000254&MI0000267&hsa-miR-10b-5p&offsets|0|+1|TACCCTGTAGAACCGAATTTGTGT	-		SRPK1|6732	-	-		-	-	-
-	-	-		NSUN5|55695	MI0000459&hsa-mir-143&coords|5|+|148808540|148808562|CTGAGATGAAGCACTGTAGCTCA	-		ZDHHC18|84243	-	-		-	-	-
-	-	-		C1orf43|25912	MIMAT0000435&MI0000459&hsa-miR-143-3p&offsets|0|+1|TGAGATGAAGCACTGTAGCTCA	-		RNPS1|10921	-	-		-	-	-
-	-	-		URB2|9816	MIMAT0000437&MI0000461&hsa-miR-145-5p&offsets|0|0|GTCCAGTTTTCCCAGGAATCCCT	-		ATP6V0C|527	-	-		-	-	-
-	-	-		TMEM97|27346	MIMAT0000254&MI0000267&hsa-miR-10b-5p&offsets|+1|-5|ACCCTGTAGAACCGAAT	-		SLAMF8|56833	-	-		-	-	-
-	-	-		CD276|80381	MIMAT0000097&MI0000101&hsa-miR-99a-5p&offsets|0|-1|AACCCGTAGATCCGATCTTGT	-		NAT9|26151	-	-		-	-	-
-	-	-		NUDCD1|84955	MIMAT0004556&MI0000267&hsa-miR-10b-3p&offsets|+1|0|CAGATTCGATTCTAGGGGAAT	-		DAPK3|1613	-	-		-	-	-
-	-	-		KDELR2|11014	MIMAT0000254&MI0000267&hsa-miR-10b-5p&offsets|+2|+1|CCCTGTAGAACCGAATTTGTGT	-		UCKL1|54963	-	-		-	-	-
-	-	-		NUP210|23225	MIMAT0000265&MI0000284&hsa-miR-204-5p&offsets|0|0|TTCCCTTTGTCATCCTATGCCT	-		FANCD2|2177	-	-		-	-	-
-	-	-		COTL1|23406	MIMAT0002177&MI0002470&hsa-miR-486-5p&offsets|0|0,MI0023622&hsa-mir-486-2&coords|8|+|41517962|41517983|TCCTGTACTGAGCTGCCCCGAG	-		DBN1|1627	-	-		-	-	-
-	-	-		DVL3|1857	MIMAT0000437&MI0000461&hsa-miR-145-5p&offsets|+1|0|TCCAGTTTTCCCAGGAATCCCT	-		GTF2IRD1|9569	-	-		-	-	-
-	-	-		PIK3R2|5296	MIMAT0000097&MI0000101&hsa-miR-99a-5p&offsets|0|0|AACCCGTAGATCCGATCTTGTG	-		PDIA4|9601	-	-		-	-	-
-	-	-		GNL2|29889	MIMAT0002177&MI0002470&hsa-miR-486-5p&offsets|0|-1,MI0023622&hsa-mir-486-2&coords|8|+|41517962|41517982|TCCTGTACTGAGCTGCCCCGA	-		BYSL|705	-	-		-	-	-
-	-	-		THOC6|79228	MIMAT0000097&MI0000101&hsa-miR-99a-5p&offsets|0|-3|AACCCGTAGATCCGATCTT	-		MARCKSL1|65108	-	-		-	-	-
-	-	-		EIF2AK1|27102	MIMAT0000254&MI0000267&hsa-miR-10b-5p&offsets|0|-8|TACCCTGTAGAACCG	-		TWF2|11344	-	-		-	-	-
-	-	-		NIPSNAP1|8508	MIMAT0004601&MI0000461&hsa-miR-145-3p&offsets|+2|0|ATTCCTGGAAATACTGTTCT	-		ARF5|381	-	-		-	-	-
-	-	-		TRABD|80305	MIMAT0000097&MI0000101&hsa-miR-99a-5p&offsets|0|-2|AACCCGTAGATCCGATCTTG	-		MRPL47|57129	-	-		-	-	-
-	-	-		KCNK1|3775	MIMAT0000254&MI0000267&hsa-miR-10b-5p&offsets|0|-6|TACCCTGTAGAACCGAA	-		RFXANK|8625	-	-		-	-	-
-	-	-		TYMP|1890	MIMAT0004556&MI0000267&hsa-miR-10b-3p&offsets|0|0|ACAGATTCGATTCTAGGGGAAT	-		TRAPPC5|126003	-	-		-	-	-
-	-	-		PNO1|56902	MIMAT0000254&MI0000267&hsa-miR-10b-5p&offsets|-1|-2|ATACCCTGTAGAACCGAATTTG	-		PIN1|5300	-	-		-	-	-
-	-	-		RBM28|55131	MIMAT0000254&MI0000267&hsa-miR-10b-5p&offsets|0|-7|TACCCTGTAGAACCGA	-		PLOD1|5351	-	-		-	-	-
-	-	-		LPAR2|9170	MIMAT0000423&MI0000446&hsa-miR-125b-5p&offsets|0|-1,MIMAT0000423&MI0000470&hsa-miR-125b-5p&offsets|0|-1|TCCCTGAGACCCTAACTTGTG	-		USF1|7391	-	-		-	-	-
-	-	-		HSP90B1|7184	MIMAT0002177&MI0002470&hsa-miR-486-5p&offsets|0|-2,MI0023622&hsa-mir-486-2&coords|8|+|41517962|41517981|TCCTGTACTGAGCTGCCCCG	-		FAM50A|9130	-	-		-	-	-
-	-	-		GBA|2629	MIMAT0000254&MI0000267&hsa-miR-10b-5p&offsets|+1|-7|ACCCTGTAGAACCGA	-		EIF4G1|1981	-	-		-	-	-
-	-	-		AHSA1|10598	MIMAT0000254&MI0000267&hsa-miR-10b-5p&offsets|+2|-1|CCCTGTAGAACCGAATTTGT	-		GBA|2629	-	-		-	-	-
-	-	-		NARF|26502	MIMAT0000263&MI0000282&hsa-miR-199b-5p&offsets|0|+1|CCCAGTGTTTAGACTATCTGTTCA	-		DNM2|1785	-	-		-	-	-
-	-	-		GALNS|2588	MIMAT0004615&MI0000489&hsa-miR-195-3p&offsets|0|0|CCAATATTGGCTGTGCTGCTCC	-		MAN2B1|4125	-	-		-	-	-
-	-	-		OCIAD2|132299	MIMAT0000437&MI0000461&hsa-miR-145-5p&offsets|0|-2|GTCCAGTTTTCCCAGGAATCC	-		SOX11|6664	-	-		-	-	-
-	-	-		LEPRE1|64175	MIMAT0000754&MI0000806&hsa-miR-337-3p&offsets|0|0|CTCCTATATGATGCCTTTCTTC	-		COX6A1|1337	-	-		-	-	-
-	-	-		ZNF672|79894	MIMAT0000423&MI0000446&hsa-miR-125b-5p&offsets|0|-2,MIMAT0000423&MI0000470&hsa-miR-125b-5p&offsets|0|-2|TCCCTGAGACCCTAACTTGT	-		PTCD1|26024	-	-		-	-	-
-	-	-		C8orf38|137682	MIMAT0000088&MI0000088&hsa-miR-30a-3p&offsets|+1|+2|TTTCAGTCGGATGTTTGCAGCTG	-		TARS2|80222	-	-		-	-	-
-	-	-		C1orf35|79169	MIMAT0004601&MI0000461&hsa-miR-145-3p&offsets|+2|+1|ATTCCTGGAAATACTGTTCTT	-		CACYBP|27101	-	-		-	-	-
-	-	-		FGD1|2245	MIMAT0000064&MI0000064&hsa-let-7c-5p&offsets|0|-2|TGAGGTAGTAGGTTGTATGG	-		WDR8|49856	-	-		-	-	-
-	-	-		POLR2K|5440	MIMAT0000254&MI0000267&hsa-miR-10b-5p&offsets|+4|-1|CTGTAGAACCGAATTTGT	-		NOC4L|79050	-	-		-	-	-
-	-	-		STOML2|30968	MIMAT0000098&MI0000102&hsa-miR-100-5p&offsets|0|-3|AACCCGTAGATCCGAACTT	-		NDUFB7|4713	-	-		-	-	-
-	-	-		TMEM189|387521	MIMAT0000064&MI0000064&hsa-let-7c-5p&offsets|0|-1|TGAGGTAGTAGGTTGTATGGT	-		C19orf43|79002	-	-		-	-	-
-	-	-		TXN|7295	MIMAT0000098&MI0000102&hsa-miR-100-5p&offsets|0|-1|AACCCGTAGATCCGAACTTGT	-		RUVBL1|8607	-	-		-	-	-
-	-	-		PLEKHO1|51177	MIMAT0000423&MI0000446&hsa-miR-125b-5p&offsets|0|0,MIMAT0000423&MI0000470&hsa-miR-125b-5p&offsets|0|0|TCCCTGAGACCCTAACTTGTGA	-		FAM195B|348262	-	-		-	-	-
-	-	-		MAN2B1|4125	MIMAT0000437&MI0000461&hsa-miR-145-5p&offsets|+1|-1|TCCAGTTTTCCCAGGAATCCC	-		EIF2C2|27161	-	-		-	-	-
-	-	-		NR2C2AP|126382	MIMAT0004597&MI0000456&hsa-miR-140-3p&offsets|+1|+3|ACCACAGGGTAGAACCACGGACA	-		MTERFD1|51001	-	-		-	-	-
-	-	-		LSM14B|149986	MIMAT0000253&MI0000266&hsa-miR-10a-5p&offsets|+1|-3|ACCCTGTAGATCCGAATTT	-		TMC6|11322	-	-		-	-	-
-	-	-		BUD31|8896	MIMAT0000275&MI0000294&hsa-miR-218-5p&offsets|0|+2,MIMAT0000275&MI0000295&hsa-miR-218-5p&offsets|0|+2|TTGTGCTTGATCTAACCATGTGG	-		RDBP|7936	-	-		-	-	-
-	-	-		TRIM65|201292	MIMAT0022721&MI0006382&hsa-miR-1247-3p&offsets|+3|0|CGGGAACGTCGAGACTGGAGC	-		POLA2|23649	-	-		-	-	-
-	-	-		TMED3|23423	MIMAT0000082&MI0000750&hsa-miR-26a-5p&offsets|0|+1,MIMAT0000082&MI0000083&hsa-miR-26a-5p&offsets|0|+1|TTCAAGTAATCCAGGATAGGCTG	-		ZDHHC12|84885	-	-		-	-	-
-	-	-		PUS7|54517	MIMAT0000064&MI0000064&hsa-let-7c-5p&offsets|0|0|TGAGGTAGTAGGTTGTATGGTT	-		ITPA|3704	-	-		-	-	-
-	-	-		MBOAT7|79143	MIMAT0000263&MI0000282&hsa-miR-199b-5p&offsets|0|0|CCCAGTGTTTAGACTATCTGTTC	-		NDUFAB1|4706	-	-		-	-	-
-	-	-		MTX1|4580	MIMAT0000097&MI0000101&hsa-miR-99a-5p&offsets|0|-4|AACCCGTAGATCCGATCT	-		TFAP4|7023	-	-		-	-	-
-	-	-		CCDC21|64793	MIMAT0000253&MI0000266&hsa-miR-10a-5p&offsets|+1|-1|ACCCTGTAGATCCGAATTTGT	-		LAD1|3898	-	-		-	-	-
-	-	-		CDK4|1019	MIMAT0000098&MI0000102&hsa-miR-100-5p&offsets|0|-4|AACCCGTAGATCCGAACT	-		PPIB|5479	-	-		-	-	-
-	-	-		TOMM40L|84134	MIMAT0000254&MI0000267&hsa-miR-10b-5p&offsets|+2|0|CCCTGTAGAACCGAATTTGTG	-		SRPRB|58477	-	-		-	-	-
-	-	-		DDX49|54555	MIMAT0000461&MI0000489&hsa-miR-195-5p&offsets|0|-1|TAGCAGCACAGAAATATTGG	-		MAPKAPK2|9261	-	-		-	-	-
-	-	-		ABCF1|23	MIMAT0004603&MI0000470&hsa-miR-125b-2-3p&offsets|+2|+2|ACAAGTCAGGCTCTTGGGACCT	-		WBSCR22|114049	-	-		-	-	-
-	-	-		COPB2|9276	MIMAT0000435&MI0000459&hsa-miR-143-3p&offsets|-2|-3|TCTGAGATGAAGCACTGTAG	-		ZWILCH|55055	-	-		-	-	-
-	-	-		DAXX|1616	MIMAT0000253&MI0000266&hsa-miR-10a-5p&offsets|+1|-4|ACCCTGTAGATCCGAATT	-		SF4|57794	-	-		-	-	-
-	-	-		RHBDD3|25807	MIMAT0000064&MI0000064&hsa-let-7c-5p&offsets|-1|-2|TTGAGGTAGTAGGTTGTATGG	-		RPP25|54913	-	-		-	-	-
-	-	-		CDC42SE1|56882	MIMAT0000253&MI0000266&hsa-miR-10a-5p&offsets|0|-1|TACCCTGTAGATCCGAATTTGT	-		ARHGAP39|80728	-	-		-	-	-
-	-	-		SAPS1|22870	MIMAT0000263&MI0000282&hsa-miR-199b-5p&offsets|0|-2|CCCAGTGTTTAGACTATCTGT	-		NRM|11270	-	-		-	-	-
-	-	-		CXCR4|7852	MIMAT0000435&MI0000459&hsa-miR-143-3p&offsets|-1|-2|CTGAGATGAAGCACTGTAGC	-		RUVBL2|10856	-	-		-	-	-
-	-	-		PUS1|80324	MIMAT0000099&MI0000739&hsa-miR-101-3p&offsets|0|+2|TACAGTACTGTGATAACTGAAGA	-		ZFPL1|7542	-	-		-	-	-
-	-	-		PHF5A|84844	MIMAT0000064&MI0000064&hsa-let-7c-5p&offsets|0|-3|TGAGGTAGTAGGTTGTATG	-		MFSD3|113655	-	-		-	-	-
-	-	-		CAPG|822	MIMAT0004601&MI0000461&hsa-miR-145-3p&offsets|0|0|GGATTCCTGGAAATACTGTTCT	-		TTC13|79573	-	-		-	-	-
-	-	-		PGP|283871	MIMAT0000098&MI0000102&hsa-miR-100-5p&offsets|0|0|AACCCGTAGATCCGAACTTGTG	-		MYO19|80179	-	-		-	-	-
-	-	-		TMEM104|54868	MIMAT0000098&MI0000102&hsa-miR-100-5p&offsets|0|-2|AACCCGTAGATCCGAACTTG	-		SLC35F2|54733	-	-		-	-	-
-	-	-		YEATS2|55689	MIMAT0001631&MI0001729&hsa-miR-451a&offsets|0|-1|AAACCGTTACCATTACTGAGT	-		INTS7|25896	-	-		-	-	-
-	-	-		PABPC1|26986	MIMAT0000253&MI0000266&hsa-miR-10a-5p&offsets|0|-5|TACCCTGTAGATCCGAAT	-		EIF4A3|9775	-	-		-	-	-
-	-	-		RHEB|6009	MIMAT0000253&MI0000266&hsa-miR-10a-5p&offsets|0|-3|TACCCTGTAGATCCGAATTT	-		DEDD|9191	-	-		-	-	-
-	-	-		NDUFA9|4704	MIMAT0001631&MI0001729&hsa-miR-451a&offsets|0|0|AAACCGTTACCATTACTGAGTT	-		WDR74|54663	-	-		-	-	-
-	-	-		MAGEF1|64110	MIMAT0000254&MI0000267&hsa-miR-10b-5p&offsets|+3|-1|CCTGTAGAACCGAATTTGT	-		TCOF1|6949	-	-		-	-	-
-	-	-		PWP2|5822	MIMAT0004600&MI0000460&hsa-miR-144-5p&offsets|0|0|GGATATCATCATATACTGTAAG	-		TELO2|9894	-	-		-	-	-
-	-	-		YBX1|4904	MIMAT0001631&MI0001729&hsa-miR-451a&offsets|0|-2|AAACCGTTACCATTACTGAG	-		MRPS18A|55168	-	-		-	-	-
-	-	-		C19orf10|56005	MIMAT0000253&MI0000266&hsa-miR-10a-5p&offsets|0|-4|TACCCTGTAGATCCGAATT	-		ARHGEF19|128272	-	-		-	-	-
-	-	-		F11R|50848	MIMAT0000088&MI0000088&hsa-miR-30a-3p&offsets|0|-3|CTTTCAGTCGGATGTTTGC	-		COX6C|1345	-	-		-	-	-
-	-	-		EIF2S2|8894	MIMAT0000064&MI0000064&hsa-let-7c-5p&offsets|-1|-1|TTGAGGTAGTAGGTTGTATGGT	-		AMPD2|271	-	-		-	-	-
-	-	-		RAB8A|4218	MIMAT0004614&MI0000487&hsa-miR-193a-5p&offsets|0|-3|TGGGTCTTTGCGGGCGAGA	-		LSM10|84967	-	-		-	-	-
-	-	-		AUP1|550	MIMAT0000461&MI0000489&hsa-miR-195-5p&offsets|0|0|TAGCAGCACAGAAATATTGGC	-		CCT5|22948	-	-		-	-	-
-	-	-		SF3B14|51639	MIMAT0004597&MI0000456&hsa-miR-140-3p&offsets|0|+3|TACCACAGGGTAGAACCACGGACA	-		TRMT61A|115708	-	-		-	-	-
-	-	-		PRPF3|9129	MIMAT0001631&MI0001729&hsa-miR-451a&offsets|0|+1|AAACCGTTACCATTACTGAGTTT	-		PMM1|5372	-	-		-	-	-
-	-	-		OPN3|23596	MIMAT0000097&MI0000101&hsa-miR-99a-5p&offsets|-1|-1|AAACCCGTAGATCCGATCTTGT	-		RRP9|9136	-	-		-	-	-
-	-	-		NAA10|8260	MIMAT0000098&MI0000102&hsa-miR-100-5p&offsets|0|+1|AACCCGTAGATCCGAACTTGTGG	-		MORC2|22880	-	-		-	-	-
-	-	-		COPE|11316	MIMAT0000437&MI0000461&hsa-miR-145-5p&offsets|0|+1|GTCCAGTTTTCCCAGGAATCCCTT	-		MRPL11|65003	-	-		-	-	-
-	-	-		PIGU|128869	MIMAT0000423&MI0000446&hsa-miR-125b-5p&offsets|0|-3,MIMAT0000423&MI0000470&hsa-miR-125b-5p&offsets|0|-3|TCCCTGAGACCCTAACTTG	-		ACAN|176	-	-		-	-	-
-	-	-		COMMD5|28991	MIMAT0000445&MI0000471&hsa-miR-126-3p&offsets|0|-1|TCGTACCGTGAGTAATAATGC	-		SLC4A2|6522	-	-		-	-	-
-	-	-		C7orf11|136647	MIMAT0000710&MI0000767&hsa-miR-365a-3p&offsets|0|-2,MIMAT0022834&MI0000769&hsa-miR-365b-3p&offsets|0|-2|TAATGCCCCTAAAAATCCTT	-		C11orf48|79081	-	-		-	-	-
-	-	-		PL-5283|647087	MIMAT0000088&MI0000088&hsa-miR-30a-3p&offsets|0|+1|CTTTCAGTCGGATGTTTGCAGCT	-		CLN6|54982	-	-		-	-	-
-	-	-		LRRC42|115353	MIMAT0000263&MI0000282&hsa-miR-199b-5p&offsets|0|-1|CCCAGTGTTTAGACTATCTGTT	-		TMEM104|54868	-	-		-	-	-
-	-	-		TAF6|6878	MIMAT0004603&MI0000470&hsa-miR-125b-2-3p&offsets|+2|+1|ACAAGTCAGGCTCTTGGGACC	-		LYPLA2|11313	-	-		-	-	-
-	-	-		RUVBL2|10856	MIMAT0000087&MI0000088&hsa-miR-30a-5p&offsets|0|-3|TGTAAACATCCTCGACTGG	-		DHX37|57647	-	-		-	-	-
-	-	-		ZDHHC9|51114	MIMAT0000088&MI0000088&hsa-miR-30a-3p&offsets|0|-1|CTTTCAGTCGGATGTTTGCAG	-		TAF11|6882	-	-		-	-	-
-	-	-		ACBD6|84320	MIMAT0004682&MI0000760&hsa-miR-361-3p&offsets|+1|0|CCCCCAGGTGTGATTCTGATTT	-		DVL1|1855	-	-		-	-	-
-	-	-		MRPS23|51649	MIMAT0000681&MI0000735&hsa-miR-29c-3p&offsets|0|0|TAGCACCATTTGAAATCGGTTA	-		FTSJ1|24140	-	-		-	-	-
-	-	-		ATXN2L|11273	MIMAT0000263&MI0000282&hsa-miR-199b-5p&offsets|0|-3|CCCAGTGTTTAGACTATCTG	-		POP1|10940	-	-		-	-	-
-	-	-		FAM89B|23625	MIMAT0000461&MI0000489&hsa-miR-195-5p&offsets|0|+1|TAGCAGCACAGAAATATTGGCA	-		DCPS|28960	-	-		-	-	-
-	-	-		PLAU|5328	MIMAT0000435&MI0000459&hsa-miR-143-3p&offsets|0|0|TGAGATGAAGCACTGTAGCTC	-		PMVK|10654	-	-		-	-	-
-	-	-		SSRP1|6749	MIMAT0000765&MI0000816&hsa-miR-335-5p&offsets|0|-1|TCAAGAGCAATAACGAAAAATG	-		CCDC99|54908	-	-		-	-	-
-	-	-		SSR4|6748	MIMAT0000445&MI0000471&hsa-miR-126-3p&offsets|+1|-1|CGTACCGTGAGTAATAATGC	-		LRRC61|65999	-	-		-	-	-
-	-	-		ISG20L2|81875	MIMAT0000435&MI0000459&hsa-miR-143-3p&offsets|-1|-3|CTGAGATGAAGCACTGTAG	-		ATG4D|84971	-	-		-	-	-
-	-	-		EIF4A3|9775	MIMAT0002820&MI0003138&hsa-miR-497-5p&offsets|0|0|CAGCAGCACACTGTGGTTTGT	-		B3GAT3|26229	-	-		-	-	-
-	-	-		UNC5B|219699	MIMAT0000443&MI0000469&hsa-miR-125a-5p&offsets|0|-4|TCCCTGAGACCCTTTAACCT	-		AP2S1|1175	-	-		-	-	-
-	-	-		CCT8|10694	MIMAT0000064&MI0000064&hsa-let-7c-5p&offsets|0|+1|TGAGGTAGTAGGTTGTATGGTTT	-		NOP58|51602	-	-		-	-	-
-	-	-		P4HA1|5033	MIMAT0000435&MI0000459&hsa-miR-143-3p&offsets|-1|-1|CTGAGATGAAGCACTGTAGCT	-		C19orf60|55049	-	-		-	-	-
-	-	-		TXNL4A|10907	MIMAT0000245&MI0000255&hsa-miR-30d-5p&offsets|0|-2|TGTAAACATCCCCGACTGGA	-		LIMD2|80774	-	-		-	-	-
-	-	-		DCBLD1|285761	MIMAT0000435&MI0000459&hsa-miR-143-3p&offsets|0|-2|TGAGATGAAGCACTGTAGC	-		MFSD10|10227	-	-		-	-	-
-	-	-		SCRIB|23513	MIMAT0000756&MI0000808&hsa-miR-326&offsets|0|+1|CCTCTGGGCCCTTCCTCCAGC	-		SLC25A39|51629	-	-		-	-	-
-	-	-		ERH|2079	MIMAT0000733&MI0000787&hsa-miR-379-5p&offsets|0|-1|TGGTAGACTATGGAACGTAG	-		NDUFA9|4704	-	-		-	-	-
-	-	-		EDEM2|55741	MIMAT0000681&MI0000735&hsa-miR-29c-3p&offsets|0|+1|TAGCACCATTTGAAATCGGTTAT	-		DDX27|55661	-	-		-	-	-
-	-	-		MDH2|4191	MIMAT0000100&MI0000107&hsa-miR-29b-3p&offsets|-1|-2,MIMAT0000100&MI0000105&hsa-miR-29b-3p&offsets|-1|-2|CTAGCACCATTTGAAATCAGTG	-		ACTL6A|86	-	-		-	-	-
-	-	-		EIF6|3692	MIMAT0000253&MI0000266&hsa-miR-10a-5p&offsets|0|-2|TACCCTGTAGATCCGAATTTG	-		ACTG1|71	-	-		-	-	-
-	-	-		TET3|200424	MIMAT0000731&MI0000786&hsa-miR-378a-5p&offsets|+1|0|TCCTGACTCCAGGTCCTGTGT	-		COX5B|1329	-	-		-	-	-
-	-	-		GALE|2582	MIMAT0000245&MI0000255&hsa-miR-30d-5p&offsets|0|-3|TGTAAACATCCCCGACTGG	-		SHKBP1|92799	-	-		-	-	-
-	-	-		CHPF2|54480	MIMAT0004601&MI0000461&hsa-miR-145-3p&offsets|+1|0|GATTCCTGGAAATACTGTTCT	-		C11orf75|56935	-	-		-	-	-
-	-	-		CRTC2|200186	MIMAT0002820&MI0003138&hsa-miR-497-5p&offsets|0|+1|CAGCAGCACACTGTGGTTTGTA	-		RAB8A|4218	-	-		-	-	-
-	-	-		ABHD12|26090	MIMAT0004597&MI0000456&hsa-miR-140-3p&offsets|+2|+3|CCACAGGGTAGAACCACGGACA	-		TUBG1|7283	-	-		-	-	-
-	-	-		SLC35B2|347734	MIMAT0000253&MI0000266&hsa-miR-10a-5p&offsets|+1|-2|ACCCTGTAGATCCGAATTTG	-		FAM128A|653784	-	-		-	-	-
-	-	-		CA5BP|340591	MIMAT0000444&MI0000471&hsa-miR-126-5p&offsets|0|+1|CATTATTACTTTTGGTACGCGC	-		YBX1|4904	-	-		-	-	-
-	-	-		PRKX|5613	MIMAT0000232&MI0000281&hsa-miR-199a-3p&offsets|0|+1,MIMAT0000232&MI0000242&hsa-miR-199a-3p&offsets|0|+1,MIMAT0004563&MI0000282&hsa-miR-199b-3p&offsets|0|+1|ACAGTAGTCTGCACATTGGTTAG	-		UBL4A|8266	-	-		-	-	-
-	-	-		PPIF|10105	MIMAT0000088&MI0000088&hsa-miR-30a-3p&offsets|0|-2|CTTTCAGTCGGATGTTTGCA	-		ABCF3|55324	-	-		-	-	-
-	-	-		NASP|4678	MIMAT0000765&MI0000816&hsa-miR-335-5p&offsets|0|-2|TCAAGAGCAATAACGAAAAAT	-		FOXK2|3607	-	-		-	-	-
-	-	-		DNAJA1|3301	MIMAT0004614&MI0000487&hsa-miR-193a-5p&offsets|0|-2|TGGGTCTTTGCGGGCGAGAT	-		SLC39A3|29985	-	-		-	-	-
-	-	-		PNKD|25953	MIMAT0000731&MI0000786&hsa-miR-378a-5p&offsets|0|0|CTCCTGACTCCAGGTCCTGTGT	-		RAD23A|5886	-	-		-	-	-
-	-	-		UBL4A|8266	MIMAT0000416&MI0000437&hsa-miR-1&offsets|0|0,MIMAT0000416&MI0000651&hsa-miR-1&offsets|0|0|TGGAATGTAAAGAAGTATGTAT	-		C16orf13|84326	-	-		-	-	-
-	-	-		SMG7|9887	MIMAT0000253&MI0000266&hsa-miR-10a-5p&offsets|0|-7|TACCCTGTAGATCCGA	-		C16orf42|115939	-	-		-	-	-
-	-	-		SULF1|23213	MIMAT0004515&MI0000107&hsa-miR-29b-2-5p&offsets|0|+1|CTGGTTTCACATGGTGGCTTAGA	-		ADPRHL2|54936	-	-		-	-	-
-	-	-		LRRC45|201255	MIMAT0000254&MI0000267&hsa-miR-10b-5p&offsets|+2|-2|CCCTGTAGAACCGAATTTG	-		C12orf44|60673	-	-		-	-	-
-	-	-		NDUFS2|4720	MIMAT0000736&MI0000789&hsa-miR-381-3p&offsets|0|-1|TATACAAGGGCAAGCTCTCTG	-		HNRNPL|3191	-	-		-	-	-
-	-	-		CASP3|836	MIMAT0000736&MI0000789&hsa-miR-381-3p&offsets|0|0|TATACAAGGGCAAGCTCTCTGT	-		POLR2J|5439	-	-		-	-	-
-	-	-		PPPDE2|27351	MIMAT0000064&MI0000064&hsa-let-7c-5p&offsets|-1|0|TTGAGGTAGTAGGTTGTATGGTT	-		DNMT3A|1788	-	-		-	-	-
-	-	-		NDUFAB1|4706	MIMAT0000435&MI0000459&hsa-miR-143-3p&offsets|-1|0|CTGAGATGAAGCACTGTAGCTC	-		LIMK1|3984	-	-		-	-	-
-	-	-		DNASE2|1777	MIMAT0026472&MI0000064&hsa-let-7c-3p&offsets|0|0|CTGTACAACCTTCTAGCTTTCC	-		RRBP1|6238	-	-		-	-	-
-	-	-		PGBD5|79605	MIMAT0000253&MI0000266&hsa-miR-10a-5p&offsets|0|0|TACCCTGTAGATCCGAATTTGTG	-		TRIM47|91107	-	-		-	-	-
-	-	-		CSTF2|1478	MIMAT0000254&MI0000267&hsa-miR-10b-5p&offsets|+4|0|CTGTAGAACCGAATTTGTG	-		A2ML1|144568	-	-		-	-	-
-	-	-		TDRKH|11022	MIMAT0000444&MI0000471&hsa-miR-126-5p&offsets|0|-1|CATTATTACTTTTGGTACGC	-		CECR5|27440	-	-		-	-	-
-	-	-		ATP5C1|509	MIMAT0000435&MI0000459&hsa-miR-143-3p&offsets|+3|+1|GATGAAGCACTGTAGCTCA	-		COX7B|1349	-	-		-	-	-
-	-	-		FAM108C1|58489	MIMAT0000082&MI0000750&hsa-miR-26a-5p&offsets|0|+2,MIMAT0000082&MI0000083&hsa-miR-26a-5p&offsets|0|+2|TTCAAGTAATCCAGGATAGGCTGT	-		PSMB2|5690	-	-		-	-	-
-	-	-		CDKN2A|1029	MIMAT0000733&MI0000787&hsa-miR-379-5p&offsets|0|0|TGGTAGACTATGGAACGTAGG	-		RABAC1|10567	-	-		-	-	-
-	-	-		ARF5|381	MIMAT0004615&MI0000489&hsa-miR-195-3p&offsets|0|+1|CCAATATTGGCTGTGCTGCTCCA	-		RNF187|149603	-	-		-	-	-
-	-	-		MSH2|4436	MIMAT0000444&MI0000471&hsa-miR-126-5p&offsets|0|0|CATTATTACTTTTGGTACGCG	-		TBCE|6905	-	-		-	-	-
-	-	-		RMI1|80010	MIMAT0005899&MI0006382&hsa-miR-1247-5p&offsets|0|0|ACCCGTCCCGTTCGTCCCCGGA	-		APEX2|27301	-	-		-	-	-
-	-	-		SDC1|6382	MIMAT0003879&MI0003757&hsa-miR-758-3p&offsets|0|0|TTTGTGACCTGGTCCACTAACC	-		C17orf90|339229	-	-		-	-	-
-	-	-		RPP38|10557	MIMAT0000253&MI0000266&hsa-miR-10a-5p&offsets|+1|-7|ACCCTGTAGATCCGA	-		MRPL17|63875	-	-		-	-	-
-	-	-		C3orf26|84319	MIMAT0001631&MI0001729&hsa-miR-451a&offsets|+1|-1|AACCGTTACCATTACTGAGT	-		HRAS|3265	-	-		-	-	-
-	-	-		TIMM44|10469	MIMAT0000100&MI0000107&hsa-miR-29b-3p&offsets|-1|-3,MIMAT0000100&MI0000105&hsa-miR-29b-3p&offsets|-1|-3|CTAGCACCATTTGAAATCAGT	-		KDELR3|11015	-	-		-	-	-
-	-	-		UBE2I|7329	MIMAT0026483&MI0000778&hsa-miR-370-5p&offsets|0|0|CAGGTCACGTCTCTGCAGTTAC	-		RABIF|5877	-	-		-	-	-
-	-	-		DGUOK|1716	MIMAT0000693&MI0000749&hsa-miR-30e-3p&offsets|0|+1|CTTTCAGTCGGATGTTTACAGCG	-		SLC27A4|10999	-	-		-	-	-
-	-	-		MBOAT2|129642	MIMAT0000754&MI0000806&hsa-miR-337-3p&offsets|+1|0|TCCTATATGATGCCTTTCTTC	-		DKC1|1736	-	-		-	-	-
-	-	-		SCO2|9997	MIMAT0022721&MI0006382&hsa-miR-1247-3p&offsets|+3|-1|CGGGAACGTCGAGACTGGAG	-		EPHB2|2048	-	-		-	-	-
-	-	-		BOLA1|51027	MIMAT0004550&MI0000254&hsa-miR-30c-2-3p&offsets|0|0|CTGGGAGAAGGCTGTTTACTCT	-		KRI1|65095	-	-		-	-	-
-	-	-		GPN1|11321	MIMAT0000088&MI0000088&hsa-miR-30a-3p&offsets|0|0|CTTTCAGTCGGATGTTTGCAGC	-		MRPL28|10573	-	-		-	-	-
-	-	-		TMPO|7112	MIMAT0000253&MI0000266&hsa-miR-10a-5p&offsets|+1|+1|ACCCTGTAGATCCGAATTTGTGT	-		NCAPG2|54892	-	-		-	-	-
-	-	-		KRTCAP2|200185	MIMAT0016847&MI0015825&hsa-miR-378c&offsets|0|-4|ACTGGACTTGGAGTCAGAAGA	-		ADAM15|8751	-	-		-	-	-
-	-	-		TARS2|80222	MIMAT0000681&MI0000735&hsa-miR-29c-3p&offsets|0|-1|TAGCACCATTTGAAATCGGTT	-		PSMB6|5694	-	-		-	-	-
-	-	-		IKBKE|9641	MIMAT0000446&MI0000472&hsa-miR-127-3p&offsets|0|0|TCGGATCCGTCTGAGCTTGGCT	-		MAP1S|55201	-	-		-	-	-
-	-	-		ME2|4200	MIMAT0004603&MI0000470&hsa-miR-125b-2-3p&offsets|+2|0|ACAAGTCAGGCTCTTGGGAC	-		CSK|1445	-	-		-	-	-
-	-	-		UTP11L|51118	MIMAT0000087&MI0000088&hsa-miR-30a-5p&offsets|0|-2|TGTAAACATCCTCGACTGGA	-		ACAT2|39	-	-		-	-	-
-	-	-		C3orf21|152002	MIMAT0004614&MI0000487&hsa-miR-193a-5p&offsets|0|0|TGGGTCTTTGCGGGCGAGATGA	-		E2F3|1871	-	-		-	-	-
-	-	-		COL9A3|1299	MIMAT0004603&MI0000470&hsa-miR-125b-2-3p&offsets|-1|-1|ATCACAAGTCAGGCTCTTGGGA	-		ABT1|29777	-	-		-	-	-
-	-	-		WDR5|11091	MIMAT0004597&MI0000456&hsa-miR-140-3p&offsets|0|0|TACCACAGGGTAGAACCACGG	-		TOMM34|10953	-	-		-	-	-
-	-	-		KIFC2|90990	MIMAT0000086&MI0000087&hsa-miR-29a-3p&offsets|0|+1|TAGCACCATCTGAAATCGGTTAT	-		MRPS21|54460	-	-		-	-	-
-	-	-		GTF2H4|2968	MIMAT0001631&MI0001729&hsa-miR-451a&offsets|+1|+1|AACCGTTACCATTACTGAGTTT	-		PDIA6|10130	-	-		-	-	-
-	-	-		MRPL55|128308	MIMAT0000245&MI0000255&hsa-miR-30d-5p&offsets|0|-1|TGTAAACATCCCCGACTGGAA	-		NDUFB11|54539	-	-		-	-	-
-	-	-		RRP12|23223	MIMAT0000253&MI0000266&hsa-miR-10a-5p&offsets|+1|0|ACCCTGTAGATCCGAATTTGTG	-		NUP85|79902	-	-		-	-	-
-	-	-		SLC25A5|292	MIMAT0000232&MI0000281&hsa-miR-199a-3p&offsets|0|+2|ACAGTAGTCTGCACATTGGTTAGA	-		FNDC1|84624	-	-		-	-	-
-	-	-		PFN2|5217	MIMAT0000097&MI0000101&hsa-miR-99a-5p&offsets|+1|-1|ACCCGTAGATCCGATCTTGT	-		TAF6|6878	-	-		-	-	-
-	-	-		NFKBIB|4793	MIMAT0000435&MI0000459&hsa-miR-143-3p&offsets|+4|+1|ATGAAGCACTGTAGCTCA	-		LIG1|3978	-	-		-	-	-
-	-	-		RALY|22913	MIMAT0000437&MI0000461&hsa-miR-145-5p&offsets|+1|-2|TCCAGTTTTCCCAGGAATCC	-		CDK4|1019	-	-		-	-	-
-	-	-		GPATCH4|54865	MIMAT0004814&MI0003676&hsa-miR-654-3p&offsets|0|-1|TATGTCTGCTGACCATCACCT	-		MLST8|64223	-	-		-	-	-
-	-	-		SMOX|54498	MIMAT0000446&MI0000472&hsa-miR-127-3p&offsets|0|+1|TCGGATCCGTCTGAGCTTGGCTG	-		SUV39H2|79723	-	-		-	-	-
-	-	-		RAD21|5885	MIMAT0000443&MI0000469&hsa-miR-125a-5p&offsets|0|-2|TCCCTGAGACCCTTTAACCTGT	-		ARPC5|10092	-	-		-	-	-
-	-	-		HSP90AB1|3326	MIMAT0000435&MI0000459&hsa-miR-143-3p&offsets|0|-3|TGAGATGAAGCACTGTAG	-		THOC6|79228	-	-		-	-	-
-	-	-		PRMT1|3276	MIMAT0000445&MI0000471&hsa-miR-126-3p&offsets|+1|0|CGTACCGTGAGTAATAATGCG	-		IMP4|92856	-	-		-	-	-
-	-	-		GART|2618	MIMAT0000088&MI0000088&hsa-miR-30a-3p&offsets|+1|+1|TTTCAGTCGGATGTTTGCAGCT	-		DYNLL1|8655	-	-		-	-	-
-	-	-		ARFGAP1|55738	MIMAT0004550&MI0000254&hsa-miR-30c-2-3p&offsets|0|+1|CTGGGAGAAGGCTGTTTACTCTT	-		EPN1|29924	-	-		-	-	-
-	-	-		ENOPH1|58478	MIMAT0004515&MI0000107&hsa-miR-29b-2-5p&offsets|0|0|CTGGTTTCACATGGTGGCTTAG	-		CNIH4|29097	-	-		-	-	-
-	-	-		GMIP|51291	MIMAT0004614&MI0000487&hsa-miR-193a-5p&offsets|0|-4|TGGGTCTTTGCGGGCGAG	-		C1orf77|26097	-	-		-	-	-
-	-	-		MRPL11|65003	MIMAT0000710&MI0000767&hsa-miR-365a-3p&offsets|0|-1,MIMAT0022834&MI0000769&hsa-miR-365b-3p&offsets|0|-1|TAATGCCCCTAAAAATCCTTA	-		LOC80154|80154	-	-		-	-	-
-	-	-		HSPBP1|23640	MIMAT0004703&MI0000816&hsa-miR-335-3p&offsets|0|0|TTTTTCATTATTGCTCCTGACC	-		DPM1|8813	-	-		-	-	-
-	-	-		EXOSC5|56915	MIMAT0004614&MI0000487&hsa-miR-193a-5p&offsets|0|-1|TGGGTCTTTGCGGGCGAGATG	-		PRPF3|9129	-	-		-	-	-
-	-	-		HSPH1|10808	MIMAT0002808&MI0003127&hsa-miR-511-5p&offsets|0|0,MIMAT0002808&MI0003127&hsa-miR-511-5p&offsets|0|0|GTGTCTTTTGCTCTGCAGTCA	-		PRMT1|3276	-	-		-	-	-
-	-	-		ENO1|2023	MIMAT0000690&MI0000747&hsa-miR-296-5p&offsets|0|0|AGGGCCCCCCCTCAATCCTGT	-		LOC388796|388796	-	-		-	-	-
-	-	-		HAX1|10456	MIMAT0004597&MI0000456&hsa-miR-140-3p&offsets|0|+1|TACCACAGGGTAGAACCACGGA	-		DNTTIP1|116092	-	-		-	-	-
-	-	-		EHMT2|10919	MIMAT0001631&MI0001729&hsa-miR-451a&offsets|+1|-2|AACCGTTACCATTACTGAG	-		GMIP|51291	-	-		-	-	-
-	-	-		RFWD2|64326	MIMAT0000435&MI0000459&hsa-miR-143-3p&offsets|0|-1|TGAGATGAAGCACTGTAGCT	-		KIAA0415|9907	-	-		-	-	-
-	-	-		ZDHHC12|84885	MIMAT0000765&MI0000816&hsa-miR-335-5p&offsets|0|0|TCAAGAGCAATAACGAAAAATGT	-		CHPF2|54480	-	-		-	-	-
-	-	-		CLCN5|1184	MIMAT0001631&MI0001729&hsa-miR-451a&offsets|+1|0|AACCGTTACCATTACTGAGTT	-		SMS|6611	-	-		-	-	-
-	-	-		ATP6V1F|9296	MIMAT0002173&MI0002467&hsa-miR-483-3p&offsets|+1|+2|CACTCCTCTCCTCCCGTCTTCT	-		TMEM201|199953	-	-		-	-	-
-	-	-		SNRNP25|79622	MIMAT0002814&MI0003133&hsa-miR-432-5p&offsets|0|0|TCTTGGAGTAGGTCATTGGGTGG	-		MRPL2|51069	-	-		-	-	-
-	-	-		EPT1|85465	MIMAT0000098&MI0000102&hsa-miR-100-5p&offsets|+1|-1|ACCCGTAGATCCGAACTTGT	-		C1QTNF6|114904	-	-		-	-	-
-	-	-		TBC1D10B|26000	MIMAT0000710&MI0000767&hsa-miR-365a-3p&offsets|0|0,MIMAT0022834&MI0000769&hsa-miR-365b-3p&offsets|0|0|TAATGCCCCTAAAAATCCTTAT	-		CCDC85B|11007	-	-		-	-	-
-	-	-		SF3B3|23450	MIMAT0000446&MI0000472&hsa-miR-127-3p&offsets|0|-1|TCGGATCCGTCTGAGCTTGGC	-		LTBR|4055	-	-		-	-	-
-	-	-		NPM3|10360	MIMAT0002817&MI0003135&hsa-miR-495-3p&offsets|0|+1|AAACAAACATGGTGCACTTCTTT	-		ZGPAT|84619	-	-		-	-	-
-	-	-		PSMB3|5691	MIMAT0000446&MI0000472&hsa-miR-127-3p&offsets|0|-2|TCGGATCCGTCTGAGCTTGG	-		PDIA5|10954	-	-		-	-	-
-	-	-		TCOF1|6949	MIMAT0000086&MI0000087&hsa-miR-29a-3p&offsets|-1|-3|CTAGCACCATCTGAAATCGG	-		ATF5|22809	-	-		-	-	-
-	-	-		CKLF|51192	MIMAT0000461&MI0000489&hsa-miR-195-5p&offsets|0|-2|TAGCAGCACAGAAATATTG	-		GMPS|8833	-	-		-	-	-
-	-	-		PHKG2|5261	MIMAT0000754&MI0000806&hsa-miR-337-3p&offsets|0|-1|CTCCTATATGATGCCTTTCTT	-		PGAM1|5223	-	-		-	-	-
-	-	-		SRD5A1|6715	MIMAT0000253&MI0000266&hsa-miR-10a-5p&offsets|0|+1|TACCCTGTAGATCCGAATTTGTGT	-		TTC7A|57217	-	-		-	-	-
-	-	-		CLPB|81570	MIMAT0001635&MI0001733&hsa-miR-452-5p&offsets|0|0|AACTGTTTGCAGAGGAAACTGA	-		ZNF787|126208	-	-		-	-	-
-	-	-		SMPD4|55627	MIMAT0000445&MI0000471&hsa-miR-126-3p&offsets|-1|-1|CTCGTACCGTGAGTAATAATGC	-		EVPL|2125	-	-		-	-	-
-	-	-		COX5A|9377	MIMAT0004597&MI0000456&hsa-miR-140-3p&offsets|0|+2|TACCACAGGGTAGAACCACGGAC	-		SSNA1|8636	-	-		-	-	-
-	-	-		NAT10|55226	MIMAT0022929&MI0003757&hsa-miR-758-5p&offsets|+1|+1|ATGGTTGACCAGAGAGCACACG	-		GLTPD1|80772	-	-		-	-	-
-	-	-		POLD2|5425	MIMAT0000083&MI0000084&hsa-miR-26b-5p&offsets|0|+2|TTCAAGTAATTCAGGATAGGTTG	-		EXOSC5|56915	-	-		-	-	-
-	-	-		UBE2O|63893	MIMAT0000275&MI0000294&hsa-miR-218-5p&offsets|0|0,MIMAT0000275&MI0000295&hsa-miR-218-5p&offsets|0|0|TTGTGCTTGATCTAACCATGT	-		SDHC|6391	-	-		-	-	-
-	-	-		CASP2|835	MIMAT0000064&MI0000064&hsa-let-7c-5p&offsets|-1|-3|TTGAGGTAGTAGGTTGTATG	-		MRPS23|51649	-	-		-	-	-
-	-	-		TRAF2|7186	MIMAT0004511&MI0000101&hsa-miR-99a-3p&offsets|0|0|CAAGCTCGCTTCTATGGGTCTG	-		PMM2|5373	-	-		-	-	-
-	-	-		SOLH|6650	MIMAT0004703&MI0000816&hsa-miR-335-3p&offsets|-1|0|GTTTTTCATTATTGCTCCTGACC	-		DGKZ|8525	-	-		-	-	-
-	-	-		BID|637	MIMAT0000435&MI0000459&hsa-miR-143-3p&offsets|+3|0|GATGAAGCACTGTAGCTC	-		NDUFA7|4701	-	-		-	-	-
-	-	-		HGS|9146	MIMAT0000098&MI0000102&hsa-miR-100-5p&offsets|+1|0|ACCCGTAGATCCGAACTTGTG	-		MGST3|4259	-	-		-	-	-
-	-	-		WRNIP1|56897	MIMAT0000450&MI0000478&hsa-miR-149-5p&offsets|0|0|TCTGGCTCCGTGTCTTCACTCCC	-		ZNF777|27153	-	-		-	-	-
-	-	-		NEU1|4758	MIMAT0000088&MI0000088&hsa-miR-30a-3p&offsets|+1|-3|TTTCAGTCGGATGTTTGC	-		FOXP4|116113	-	-		-	-	-
-	-	-		UFC1|51506	MIMAT0000447&MI0000474&hsa-miR-134-5p&offsets|0|0|TGTGACTGGTTGACCAGAGGGG	-		FSCN1|6624	-	-		-	-	-
-	-	-		RFX5|5993	MIMAT0000253&MI0000266&hsa-miR-10a-5p&offsets|+4|-1|CTGTAGATCCGAATTTGT	-		C7orf68|29923	-	-		-	-	-
-	-	-		TMUB1|83590	MIMAT0004808&MI0003639&hsa-miR-625-3p&offsets|0|+1|GACTATAGAACTTTCCCCCTCAT	-		GNG5|2787	-	-		-	-	-
-	-	-		MRPS21|54460	MIMAT0000446&MI0000472&hsa-miR-127-3p&offsets|0|-3|TCGGATCCGTCTGAGCTTG	-		C17orf70|80233	-	-		-	-	-
-	-	-		TRPM2|7226	MIMAT0004513&MI0000103&hsa-miR-101-5p&offsets|-1|-1|TCAGTTATCACAGTGCTGATGC	-		DOM3Z|1797	-	-		-	-	-
-	-	-		MRPL36|64979	MIMAT0000062&MI0000061&hsa-let-7a-5p&offsets|0|-2,MIMAT0000062&MI0000062&hsa-let-7a-5p&offsets|0|-2,MIMAT0000062&MI0000060&hsa-let-7a-5p&offsets|0|-2|TGAGGTAGTAGGTTGTATAG	-		TIMM13|26517	-	-		-	-	-
-	-	-		FAM127B|26071	MIMAT0000435&MI0000459&hsa-miR-143-3p&offsets|+1|-3|GAGATGAAGCACTGTAG	-		ZNF469|84627	-	-		-	-	-
-	-	-		C5orf13|9315	MIMAT0000088&MI0000088&hsa-miR-30a-3p&offsets|+1|-1|TTTCAGTCGGATGTTTGCAG	-		KRT81|3887	-	-		-	-	-
-	-	-		GIPC1|10755	MIMAT0000099&MI0000103&hsa-miR-101-3p&offsets|0|+1,MIMAT0000099&MI0000739&hsa-miR-101-3p&offsets|0|+1|TACAGTACTGTGATAACTGAAG	-		C19orf50|79036	-	-		-	-	-
-	-	-		ST14|6768	MIMAT0000445&MI0000471&hsa-miR-126-3p&offsets|-1|-2|CTCGTACCGTGAGTAATAATG	-		PLAC2|257000	-	-		-	-	-
-	-	-		MAPKAPK2|9261	MIMAT0004597&MI0000456&hsa-miR-140-3p&offsets|+1|+2|ACCACAGGGTAGAACCACGGAC	-		COX5A|9377	-	-		-	-	-
-	-	-		CHFR|55743	MIMAT0002817&MI0003135&hsa-miR-495-3p&offsets|0|0|AAACAAACATGGTGCACTTCTT	-		NUDT16L1|84309	-	-		-	-	-
-	-	-		AHCY|191	MIMAT0000435&MI0000459&hsa-miR-143-3p&offsets|0|-4|TGAGATGAAGCACTGTA	-		SELS|55829	-	-		-	-	-
-	-	-		PPAN|56342	MIMAT0004603&MI0000470&hsa-miR-125b-2-3p&offsets|-1|0|ATCACAAGTCAGGCTCTTGGGAC	-		SCAF1|58506	-	-		-	-	-
-	-	-		PPARD|5467	MIMAT0004682&MI0000760&hsa-miR-361-3p&offsets|+1|+1|CCCCCAGGTGTGATTCTGATTTG	-		GTPBP5|26164	-	-		-	-	-
-	-	-		ACTB|60	MIMAT0000088&MI0000088&hsa-miR-30a-3p&offsets|0|-4|CTTTCAGTCGGATGTTTG	-		UNC13D|201294	-	-		-	-	-
-	-	-		CNPY3|10695	MIMAT0004482&MI0000063&hsa-let-7b-3p&offsets|0|-1|CTATACAACCTACTGCCTTCC	-		USF2|7392	-	-		-	-	-
-	-	-		RRP1B|23076	MIMAT0000232&MI0000281&hsa-miR-199a-3p&offsets|+1|+1,MIMAT0000232&MI0000242&hsa-miR-199a-3p&offsets|+1|+1,MIMAT0004563&MI0000282&hsa-miR-199b-3p&offsets|+1|+1|CAGTAGTCTGCACATTGGTTAG	-		CHCHD3|54927	-	-		-	-	-
-	-	-		LCLAT1|253558	MIMAT0000681&MI0000735&hsa-miR-29c-3p&offsets|0|-3|TAGCACCATTTGAAATCGG	-		DIRAS1|148252	-	-		-	-	-
-	-	-		CCDC86|79080	MIMAT0000062&MI0000061&hsa-let-7a-5p&offsets|0|-1,MIMAT0000062&MI0000062&hsa-let-7a-5p&offsets|0|-1,MIMAT0000062&MI0000060&hsa-let-7a-5p&offsets|0|-1|TGAGGTAGTAGGTTGTATAGT	-		G6PD|2539	-	-		-	-	-
-	-	-		RNF8|9025	MIMAT0000063&MI0000063&hsa-let-7b-5p&offsets|0|-1|TGAGGTAGTAGGTTGTGTGGT	-		NDUFS8|4728	-	-		-	-	-
-	-	-		KIAA2013|90231	MIMAT0000754&MI0000806&hsa-miR-337-3p&offsets|+1|-1|TCCTATATGATGCCTTTCTT	-		FANCG|2189	-	-		-	-	-
-	-	-		ATP13A1|57130	MIMAT0004597&MI0000456&hsa-miR-140-3p&offsets|+4|+6|ACAGGGTAGAACCACGGACAGGA	-		FH|2271	-	-		-	-	-
-	-	-		MEX3D|399664	MIMAT0004500&MI0000084&hsa-miR-26b-3p&offsets|0|0|CCTGTTCTCCATTACTTGGCTC	-		B4GALNT4|338707	-	-		-	-	-
-	-	-		GIYD2|79008	MIMAT0000443&MI0000469&hsa-miR-125a-5p&offsets|0|-5|TCCCTGAGACCCTTTAACC	-		UQCRC1|7384	-	-		-	-	-
-	-	-		GRK6|2870	MIMAT0000087&MI0000088&hsa-miR-30a-5p&offsets|0|-1|TGTAAACATCCTCGACTGGAA	-		ZFP64|55734	-	-		-	-	-
-	-	-		LARP4B|23185	MIMAT0000253&MI0000266&hsa-miR-10a-5p&offsets|-1|-3|ATACCCTGTAGATCCGAATTT	-		SH3BP5L|80851	-	-		-	-	-
-	-	-		MAPK13|5603	MIMAT0004501&MI0000085&hsa-miR-27a-5p&offsets|0|0|AGGGCTTAGCTGCTTGTGAGCA	-		CHERP|10523	-	-		-	-	-
-	-	-		SIGMAR1|10280	MIMAT0000082&MI0000750&hsa-miR-26a-5p&offsets|0|0,MIMAT0000082&MI0000083&hsa-miR-26a-5p&offsets|0|0|TTCAAGTAATCCAGGATAGGCT	-		NPLOC4|55666	-	-		-	-	-
-	-	-		FH|2271	MIMAT0000063&MI0000063&hsa-let-7b-5p&offsets|0|-2|TGAGGTAGTAGGTTGTGTGG	-		CD276|80381	-	-		-	-	-
-	-	-		FANCC|2176	MIMAT0000087&MI0000088&hsa-miR-30a-5p&offsets|0|0|TGTAAACATCCTCGACTGGAAG	-		GET4|51608	-	-		-	-	-
-	-	-		IMPA2|3613	MIMAT0000445&MI0000471&hsa-miR-126-3p&offsets|0|-5|TCGTACCGTGAGTAATA	-		IKBKE|9641	-	-		-	-	-
-	-	-		ATP1B3|483	MIMAT0000082&MI0000750&hsa-miR-26a-5p&offsets|0|-1,MIMAT0000082&MI0000083&hsa-miR-26a-5p&offsets|0|-1|TTCAAGTAATCCAGGATAGGC	-		NDUFA6|4700	-	-		-	-	-
-	-	-		C16orf53|79447	MIMAT0000063&MI0000063&hsa-let-7b-5p&offsets|0|-4|TGAGGTAGTAGGTTGTGT	-		DNAJC2|27000	-	-		-	-	-
-	-	-		NUDT19|390916	MIMAT0000088&MI0000088&hsa-miR-30a-3p&offsets|+1|0|TTTCAGTCGGATGTTTGCAGC	-		PHF19|26147	-	-		-	-	-
-	-	-		MRPL48|51642	MIMAT0000681&MI0000735&hsa-miR-29c-3p&offsets|-1|-3|CTAGCACCATTTGAAATCGG	-		CYHR1|50626	-	-		-	-	-
-	-	-		ARPC4|10093	MIMAT0000423&MI0000446&hsa-miR-125b-5p&offsets|+1|0,MIMAT0000423&MI0000470&hsa-miR-125b-5p&offsets|+1|0|CCCTGAGACCCTAACTTGTGA	-		RELB|5971	-	-		-	-	-
-	-	-		RPIA|22934	MIMAT0000443&MI0000469&hsa-miR-125a-5p&offsets|0|-3|TCCCTGAGACCCTTTAACCTG	-		GRN|2896	-	-		-	-	-
-	-	-		POLR2F|5435	MIMAT0000062&MI0000061&hsa-let-7a-5p&offsets|0|-3,MIMAT0000062&MI0000062&hsa-let-7a-5p&offsets|0|-3,MIMAT0000062&MI0000060&hsa-let-7a-5p&offsets|0|-3|TGAGGTAGTAGGTTGTATA	-		PPIF|10105	-	-		-	-	-
-	-	-		CLIC1|1192	MIMAT0000253&MI0000266&hsa-miR-10a-5p&offsets|-1|-1|ATACCCTGTAGATCCGAATTTGT	-		CYCS|54205	-	-		-	-	-
-	-	-		BZW2|28969	MIMAT0000064&MI0000064&hsa-let-7c-5p&offsets|+1|0|GAGGTAGTAGGTTGTATGGTT	-		NSDHL|50814	-	-		-	-	-
-	-	-		NMI|9111	MIMAT0000458&MI0000486&hsa-miR-190a-5p&offsets|0|-1|TGATATGTTTGATATATTAGG	-		MAGOHB|55110	-	-		-	-	-
-	-	-		NXT1|29107	MIMAT0000510&MI0000542&hsa-miR-320a&offsets|-1|0|GAAAAGCTGGGTTGAGAGGGCGA	-		CNPY3|10695	-	-		-	-	-
-	-	-		CNOT3|4849	MIMAT0000681&MI0000735&hsa-miR-29c-3p&offsets|-1|-1|CTAGCACCATTTGAAATCGGTT	-		ST3GAL4|6484	-	-		-	-	-
-	-	-		MMP14|4323	MIMAT0004606&MI0000475&hsa-miR-136-3p&offsets|0|0|CATCATCGTCTCAAATGAGTCT	-		C8orf38|137682	-	-		-	-	-
-	-	-		MSH6|2956	MIMAT0000737&MI0000790&hsa-miR-382-5p&offsets|+1|0|AAGTTGTTCGTGGTGGATTCG	-		TCIRG1|10312	-	-		-	-	-
-	-	-		PMF1|11243	MIMAT0000063&MI0000063&hsa-let-7b-5p&offsets|0|+1|TGAGGTAGTAGGTTGTGTGGTTT	-		MTFR1|9650	-	-		-	-	-
-	-	-		ZNRD1|30834	MIMAT0000231&MI0000281&hsa-miR-199a-5p&offsets|0|+1,MIMAT0000231&MI0000242&hsa-miR-199a-5p&offsets|0|+1|CCCAGTGTTCAGACTACCTGTTCA	-		RNF126|55658	-	-		-	-	-
-	-	-		ATIC|471	MIMAT0000087&MI0000088&hsa-miR-30a-5p&offsets|0|-4|TGTAAACATCCTCGACTG	-		CCDC21|64793	-	-		-	-	-
-	-	-		GTPBP3|84705	MIMAT0004808&MI0003639&hsa-miR-625-3p&offsets|0|0|GACTATAGAACTTTCCCCCTCA	-		MRPL36|64979	-	-		-	-	-
-	-	-		ZMIZ2|83637	MIMAT0000756&MI0000808&hsa-miR-326&offsets|0|0|CCTCTGGGCCCTTCCTCCAG	-		COL9A3|1299	-	-		-	-	-
-	-	-		MPV17L2|84769	MIMAT0000510&MI0000542&hsa-miR-320a&offsets|-1|-1|GAAAAGCTGGGTTGAGAGGGCG	-		MAP4K2|5871	-	-		-	-	-
-	-	-		CSTF3|1479	MIMAT0000253&MI0000266&hsa-miR-10a-5p&offsets|-1|-2|ATACCCTGTAGATCCGAATTTG	-		C17orf62|79415	-	-		-	-	-
-	-	-		MRPL4|51073	MIMAT0003163&MI0003514&hsa-miR-539-5p&offsets|0|0|GGAGAAATTATCCTTGGTGTGT	-		SLC2A1|6513	-	-		-	-	-
-	-	-		LEMD2|221496	MIMAT0000062&MI0000060&hsa-let-7a-5p&offsets|-1|-1|ATGAGGTAGTAGGTTGTATAGT	-		DPM2|8818	-	-		-	-	-
-	-	-		IPO9|55705	MIMAT0000437&MI0000461&hsa-miR-145-5p&offsets|0|-3|GTCCAGTTTTCCCAGGAATC	-		CYBA|1535	-	-		-	-	-
-	-	-		HAPLN3|145864	MIMAT0000100&MI0000107&hsa-miR-29b-3p&offsets|-1|-4,MIMAT0000100&MI0000105&hsa-miR-29b-3p&offsets|-1|-4|CTAGCACCATTTGAAATCAG	-		NDUFS5|4725	-	-		-	-	-
-	-	-		CMAS|55907	MIMAT0000063&MI0000063&hsa-let-7b-5p&offsets|0|0|TGAGGTAGTAGGTTGTGTGGTT	-		DGCR14|8220	-	-		-	-	-
-	-	-		EIF4G1|1981	MIMAT0000097&MI0000101&hsa-miR-99a-5p&offsets|+1|0|ACCCGTAGATCCGATCTTGTG	-		PNO1|56902	-	-		-	-	-
-	-	-		HMGN1|3150	MIMAT0000266&MI0000285&hsa-miR-205-5p&offsets|0|-5|TCCTTCATTCCACCGGA	-		C11orf31|280636	-	-		-	-	-
-	-	-		MIIP|60672	MIMAT0000450&MI0000478&hsa-miR-149-5p&offsets|0|-1|TCTGGCTCCGTGTCTTCACTCC	-		PTP4A3|11156	-	-		-	-	-
-	-	-		RAE1|8480	MIMAT0000452&MI0000480&hsa-miR-154-5p&offsets|0|0|TAGGTTATCCGTGTTGCCTTCG	-		TFRC|7037	-	-		-	-	-
-	-	-		SFRS1|6426	MIMAT0000266&MI0000285&hsa-miR-205-5p&offsets|0|-1|TCCTTCATTCCACCGGAGTCT	-		IRF7|3665	-	-		-	-	-
-	-	-		SC65|10609	MIMAT0000681&MI0000735&hsa-miR-29c-3p&offsets|0|-4|TAGCACCATTTGAAATCG	-		C12orf52|84934	-	-		-	-	-
-	-	-		FOXP4|116113	MIMAT0000244&MI0000736&hsa-miR-30c-5p&offsets|0|-2,MIMAT0000244&MI0000254&hsa-miR-30c-5p&offsets|0|-2|TGTAAACATCCTACACTCTCA	-		BRI3|25798	-	-		-	-	-
-	-	-		FUS|2521	MIMAT0000242&MI0000473&hsa-miR-129-5p&offsets|0|0,MIMAT0000242&MI0000252&hsa-miR-129-5p&offsets|0|0|CTTTTTGCGGTCTGGGCTTGC	-		FAM96B|51647	-	-		-	-	-
-	-	-		CAPS|828	MIMAT0000763&MI0000814&hsa-miR-338-3p&offsets|0|-2|TCCAGCATCAGTGATTTTGT	-		SUMO3|6612	-	-		-	-	-
-	-	-		YWHAH|7533	MIMAT0000087&MI0000088&hsa-miR-30a-5p&offsets|+1|0|GTAAACATCCTCGACTGGAAG	-		SAFB|6294	-	-		-	-	-
-	-	-		UFD1L|7353	MIMAT0000253&MI0000266&hsa-miR-10a-5p&offsets|+2|-1|CCCTGTAGATCCGAATTTGT	-		PLEKHJ1|55111	-	-		-	-	-
-	-	-		WDR46|9277	MIMAT0006790&MI0005416&hsa-miR-675-3p&offsets|0|+2|CTGTATGCCCTCACCGCTCAGC	-		RHOD|29984	-	-		-	-	-
-	-	-		CXCL13|10563	MIMAT0000732&MI0000786&hsa-miR-378a-3p&offsets|0|+1|ACTGGACTTGGAGTCAGAAGGC	-		PTDSS1|9791	-	-		-	-	-
-	-	-		ZNF74|7625	MIMAT0002819&MI0003137&hsa-miR-193b-3p&offsets|0|+1|AACTGGCCCTCAAAGTCCCGCTT	-		SYNGR2|9144	-	-		-	-	-
-	-	-		LOC152217|152217	MIMAT0003879&MI0003757&hsa-miR-758-3p&offsets|0|-1|TTTGTGACCTGGTCCACTAAC	-		ZNF593|51042	-	-		-	-	-
-	-	-		NDUFB11|54539	MIMAT0001635&MI0001733&hsa-miR-452-5p&offsets|0|+1|AACTGTTTGCAGAGGAAACTGAG	-		CAPN1|823	-	-		-	-	-
-	-	-		SLC20A1|6574	MIMAT0000086&MI0000087&hsa-miR-29a-3p&offsets|0|-1|TAGCACCATCTGAAATCGGTT	-		ENO1|2023	-	-		-	-	-
-	-	-		CCT7|10574	MIMAT0000092&MI0000094&hsa-miR-92a-3p&offsets|0|+1|TATTGCACTTGTCCCGGCCTGTG	-		PHF5A|84844	-	-		-	-	-
-	-	-		SHARPIN|81858	MIMAT0000731&MI0000786&hsa-miR-378a-5p&offsets|0|-2|CTCCTGACTCCAGGTCCTGT	-		RDH10|157506	-	-		-	-	-
-	-	-		KIAA1841|84542	MIMAT0000447&MI0000474&hsa-miR-134-5p&offsets|0|-1|TGTGACTGGTTGACCAGAGGG	-		KIAA2013|90231	-	-		-	-	-
-	-	-		SHKBP1|92799	MIMAT0000266&MI0000285&hsa-miR-205-5p&offsets|0|0|TCCTTCATTCCACCGGAGTCTG	-		ACOT8|10005	-	-		-	-	-
-	-	-		ZDHHC18|84243	MIMAT0000232&MI0000281&hsa-miR-199a-3p&offsets|-1|0,MIMAT0000232&MI0000242&hsa-miR-199a-3p&offsets|-1|0,MIMAT0004563&MI0000282&hsa-miR-199b-3p&offsets|-1|0|TACAGTAGTCTGCACATTGGTTA	-		MTCH2|23788	-	-		-	-	-
-	-	-		MRPL42|28977	MIMAT0000419&MI0000440&hsa-miR-27b-3p&offsets|0|+1|TTCACAGTGGCTAAGTTCTGCA	-		PGLS|25796	-	-		-	-	-
-	-	-		ZNF469|84627	MIMAT0004606&MI0000475&hsa-miR-136-3p&offsets|+1|0|ATCATCGTCTCAAATGAGTCT	-		PRKCSH|5589	-	-		-	-	-
-	-	-		GUK1|2987	MIMAT0004485&MI0000066&hsa-let-7e-3p&offsets|0|0|CTATACGGCCTCCTAGCTTTCC	-		DNAJA3|9093	-	-		-	-	-
-	-	-		PFKP|5214	MIMAT0000763&MI0000814&hsa-miR-338-3p&offsets|0|0|TCCAGCATCAGTGATTTTGTTG	-		ANKRD13D|338692	-	-		-	-	-
-	-	-		CYBA|1535	MIMAT0000253&MI0000266&hsa-miR-10a-5p&offsets|+2|+1|CCCTGTAGATCCGAATTTGTGT	-		PSMD3|5709	-	-		-	-	-
-	-	-		NCLN|56926	MIMAT0000693&MI0000749&hsa-miR-30e-3p&offsets|0|-3|CTTTCAGTCGGATGTTTAC	-		OGFR|11054	-	-		-	-	-
-	-	-		LOC388955|388955	MIMAT0000099&MI0000103&hsa-miR-101-3p&offsets|0|-1,MIMAT0000099&MI0000739&hsa-miR-101-3p&offsets|0|-1|TACAGTACTGTGATAACTGA	-		C9orf16|79095	-	-		-	-	-
-	-	-		MRPS5|64969	MIMAT0000722&MI0000778&hsa-miR-370-3p&offsets|0|-1|GCCTGCTGGGGTGGAACCTGG	-		SLC6A8|6535	-	-		-	-	-
-	-	-		ISG20|3669	MIMAT0000733&MI0000787&hsa-miR-379-5p&offsets|0|-3|TGGTAGACTATGGAACGT	-		LSS|4047	-	-		-	-	-
-	-	-		RFC3|5983	MIMAT0004673&MI0000735&hsa-miR-29c-5p&offsets|+2|+3|ACCGATTTCTCCTGGTGTTCAGA	-		COX7A2|1347	-	-		-	-	-
-	-	-		C1orf122|127687	MIMAT0004673&MI0000735&hsa-miR-29c-5p&offsets|+2|+2|ACCGATTTCTCCTGGTGTTCAG	-		MAGED1|9500	-	-		-	-	-
-	-	-		NETO2|81831	MIMAT0002171&MI0002465&hsa-miR-410-3p&offsets|0|0|AATATAACACAGATGGCCTGT	-		THOP1|7064	-	-		-	-	-
-	-	-		ABCF2|10061	MIMAT0000710&MI0000767&hsa-miR-365a-3p&offsets|0|+1,MIMAT0022834&MI0000769&hsa-miR-365b-3p&offsets|0|+1|TAATGCCCCTAAAAATCCTTATT	-		CBR1|873	-	-		-	-	-
-	-	-		RBX1|9978	MIMAT0003329&MI0003675&hsa-miR-411-5p&offsets|-1|0|ATAGTAGACCGTATAGCGTACG	-		TXNDC17|84817	-	-		-	-	-
-	-	-		FAM83H|286077	MIMAT0000510&MI0000542&hsa-miR-320a&offsets|0|+2|AAAAGCTGGGTTGAGAGGGCGAAA	-		WDR5|11091	-	-		-	-	-
-	-	-		NOC2L|26155	MIMAT0000451&MI0000479&hsa-miR-150-5p&offsets|-2|-2|TGTCTCCCAACCCTTGTACCAG	-		TUFM|7284	-	-		-	-	-
-	-	-		BRMS1|25855	MIMAT0000099&MI0000103&hsa-miR-101-3p&offsets|0|0,MIMAT0000099&MI0000739&hsa-miR-101-3p&offsets|0|0|TACAGTACTGTGATAACTGAA	-		POLR2K|5440	-	-		-	-	-
-	-	-		DHX34|9704	MIMAT0004673&MI0000735&hsa-miR-29c-5p&offsets|0|0|TGACCGATTTCTCCTGGTGTTC	-		C19orf24|55009	-	-		-	-	-
-	-	-		MDK|4192	MIMAT0000731&MI0000786&hsa-miR-378a-5p&offsets|0|-1|CTCCTGACTCCAGGTCCTGTG	-		KLF16|83855	-	-		-	-	-
-	-	-		C19orf63|284361	MIMAT0005949&MI0006442&hsa-miR-664a-3p&offsets|0|-1|TATTCATTTATCCCCAGCCTAC	-		HMOX2|3163	-	-		-	-	-
-	-	-		HLA-A|3105	MIMAT0000728&MI0000783&hsa-miR-375&offsets|0|+1|TTTGTTCGTTCGGCTCGCGTGAG	-		AP2M1|1173	-	-		-	-	-
-	-	-		CHCHD2|51142	MIMAT0006790&MI0005416&hsa-miR-675-3p&offsets|0|+1|CTGTATGCCCTCACCGCTCAG	-		ARHGEF2|9181	-	-		-	-	-
-	-	-		TRMU|55687	MIMAT0000082&MI0000750&hsa-miR-26a-5p&offsets|0|-4,MIMAT0000082&MI0000083&hsa-miR-26a-5p&offsets|0|-4|TTCAAGTAATCCAGGATA	-		ACTR3|10096	-	-		-	-	-
-	-	-		ARMC6|93436	MIMAT0000445&MI0000471&hsa-miR-126-3p&offsets|0|-2|TCGTACCGTGAGTAATAATG	-		UBE2M|9040	-	-		-	-	-
-	-	-		EFNA3|1944	MIMAT0000266&MI0000285&hsa-miR-205-5p&offsets|0|+1|TCCTTCATTCCACCGGAGTCTGT	-		H3F3A|3020	-	-		-	-	-
-	-	-		BLOC1S3|388552	MIMAT0004911&MI0005532&hsa-miR-874-3p&offsets|0|0|CTGCCCTGGCCCGAGGGACCGA	-		MSTO1|55154	-	-		-	-	-
-	-	-		MRPS34|65993	MIMAT0002807&MI0003126&hsa-miR-491-5p&offsets|0|0|AGTGGGGAACCCTTCCATGAGG	-		ALDH18A1|5832	-	-		-	-	-
-	-	-		TP53BP2|7159	MIMAT0000086&MI0000087&hsa-miR-29a-3p&offsets|0|0|TAGCACCATCTGAAATCGGTTA	-		EHD1|10938	-	-		-	-	-
-	-	-		ATG4D|84971	MIMAT0000752&MI0000804&hsa-miR-328-3p&offsets|0|0|CTGGCCCTCTCTGCCCTTCCGT	-		MASTL|84930	-	-		-	-	-
-	-	-		HN1L|90861	MIMAT0000418&MI0000439&hsa-miR-23b-3p&offsets|0|0|ATCACATTGCCAGGGATTACC	-		PDRG1|81572	-	-		-	-	-
-	-	-		R3HDM1|23518	MIMAT0000082&MI0000750&hsa-miR-26a-5p&offsets|0|-2,MIMAT0000082&MI0000083&hsa-miR-26a-5p&offsets|0|-2|TTCAAGTAATCCAGGATAGG	-		FBXO6|26270	-	-		-	-	-
-	-	-		SERPINE2|5270	MIMAT0000266&MI0000285&hsa-miR-205-5p&offsets|0|-2|TCCTTCATTCCACCGGAGTC	-		UBE2F|140739	-	-		-	-	-
-	-	-		AP4M1|9179	MIMAT0000445&MI0000471&hsa-miR-126-3p&offsets|0|0|TCGTACCGTGAGTAATAATGCG	-		TBL2|26608	-	-		-	-	-
-	-	-		TPMT|7172	MIMAT0004682&MI0000760&hsa-miR-361-3p&offsets|0|-1|TCCCCCAGGTGTGATTCTGATT	-		ELOVL1|64834	-	-		-	-	-
-	-	-		RBM17|84991	MIMAT0000681&MI0000735&hsa-miR-29c-3p&offsets|0|-2|TAGCACCATTTGAAATCGGT	-		HPRT1|3251	-	-		-	-	-
-	-	-		EFNA1|1942	MIMAT0001635&MI0001733&hsa-miR-452-5p&offsets|+3|+2|TGTTTGCAGAGGAAACTGAGA	-		COMP|1311	-	-		-	-	-
-	-	-		IPO13|9670	MIMAT0000686&MI0000743&hsa-miR-34c-5p&offsets|0|0|AGGCAGTGTAGTTAGCTGATTGC	-		PPP2R5D|5528	-	-		-	-	-
-	-	-		PARP12|64761	MIMAT0004814&MI0003676&hsa-miR-654-3p&offsets|0|-2|TATGTCTGCTGACCATCACC	-		YWHAZ|7534	-	-		-	-	-
-	-	-		MFSD3|113655	MIMAT0000231&MI0000281&hsa-miR-199a-5p&offsets|0|0,MIMAT0000231&MI0000242&hsa-miR-199a-5p&offsets|0|0|CCCAGTGTTCAGACTACCTGTTC	-		ZNF706|51123	-	-		-	-	-
-	-	-		HEATR2|54919	MIMAT0000086&MI0000087&hsa-miR-29a-3p&offsets|0|-3|TAGCACCATCTGAAATCGG	-		ILF3|3609	-	-		-	-	-
-	-	-		AXIN1|8312	MIMAT0000720&MI0000776&hsa-miR-376c-3p&offsets|0|0|AACATAGAGGAAATTCCACGT	-		GRK6|2870	-	-		-	-	-
-	-	-		MICAL2|9645	MIMAT0000280&MI0000300&hsa-miR-223-3p&offsets|0|+1|TGTCAGTTTGTCAAATACCCCAA	-		SEC61G|23480	-	-		-	-	-
-	-	-		FAM100B|283991	MIMAT0000231&MI0000281&hsa-miR-199a-5p&offsets|0|-1,MIMAT0000231&MI0000242&hsa-miR-199a-5p&offsets|0|-1|CCCAGTGTTCAGACTACCTGTT	-		GART|2618	-	-		-	-	-
-	-	-		COPS5|10987	MIMAT0004597&MI0000456&hsa-miR-140-3p&offsets|+1|+1|ACCACAGGGTAGAACCACGGA	-		PIGU|128869	-	-		-	-	-
-	-	-		C13orf37|440145	MIMAT0005949&MI0006442&hsa-miR-664a-3p&offsets|0|0|TATTCATTTATCCCCAGCCTACA	-		RHEB|6009	-	-		-	-	-
-	-	-		PANX1|24145	MIMAT0003239&MI0003581&hsa-miR-574-3p&offsets|0|-1|CACGCTCATGCACACACCCAC	-		NAGK|55577	-	-		-	-	-
-	-	-		MRTO4|51154	MIMAT0000733&MI0000787&hsa-miR-379-5p&offsets|0|+1|TGGTAGACTATGGAACGTAGGC	-		KLHDC3|116138	-	-		-	-	-
-	-	-		TFB2M|64216	MIMAT0000088&MI0000088&hsa-miR-30a-3p&offsets|+1|-2|TTTCAGTCGGATGTTTGCA	-		LAS1L|81887	-	-		-	-	-
-	-	-		C11orf83|790955	MIMAT0000266&MI0000285&hsa-miR-205-5p&offsets|0|-3|TCCTTCATTCCACCGGAGT	-		DUSP12|11266	-	-		-	-	-
-	-	-		SKA2|348235	MIMAT0000425&MI0000448&hsa-miR-130a-3p&offsets|0|-1|CAGTGCAATGTTAAAAGGGCA	-		ARPC4|10093	-	-		-	-	-
-	-	-		HTATIP2|10553	MIMAT0003328&MI0003674&hsa-miR-653-5p&offsets|+3|+4|TTGAAACAATCTCTACTGAACC	-		LEPRE1|64175	-	-		-	-	-
-	-	-		SOX4|6659	MIMAT0003249&MI0003591&hsa-miR-584-5p&offsets|0|0|TTATGGTTTGCCTGGGACTGAG	-		C6orf1|221491	-	-		-	-	-
-	-	-		KLHDC3|116138	MIMAT0000086&MI0000087&hsa-miR-29a-3p&offsets|0|-4|TAGCACCATCTGAAATCG	-		CHCHD8|51287	-	-		-	-	-
-	-	-		BPNT1|10380	MIMAT0010195&MI0000061&hsa-let-7a-2-3p&offsets|0|0|CTGTACAGCCTCCTAGCTTTCC	-		EIF3C|8663	-	-		-	-	-
-	-	-		POLR2I|5438	MIMAT0000451&MI0000479&hsa-miR-150-5p&offsets|-2|-1|TGTCTCCCAACCCTTGTACCAGT	-		LAPTM4B|55353	-	-		-	-	-
-	-	-		TRIM47|91107	MIMAT0003239&MI0003581&hsa-miR-574-3p&offsets|0|-3|CACGCTCATGCACACACCC	-		PPPDE1|51029	-	-		-	-	-
-	-	-		PDK3|5165	MIMAT0000445&MI0000471&hsa-miR-126-3p&offsets|+1|-2|CGTACCGTGAGTAATAATG	-		DHTKD1|55526	-	-		-	-	-
-	-	-		CISD2|493856	MIMAT0003328&MI0003674&hsa-miR-653-5p&offsets|+3|+3|TTGAAACAATCTCTACTGAAC	-		SLC10A3|8273	-	-		-	-	-
-	-	-		TOMM22|56993	MIMAT0000232&MI0000281&hsa-miR-199a-3p&offsets|-1|-2,MIMAT0000232&MI0000242&hsa-miR-199a-3p&offsets|-1|-2,MIMAT0004563&MI0000282&hsa-miR-199b-3p&offsets|-1|-2|TACAGTAGTCTGCACATTGGT	-		CTSA|5476	-	-		-	-	-
-	-	-		UBE2M|9040	MIMAT0000232&MI0000281&hsa-miR-199a-3p&offsets|-1|-3,MIMAT0000232&MI0000242&hsa-miR-199a-3p&offsets|-1|-3,MIMAT0004563&MI0000282&hsa-miR-199b-3p&offsets|-1|-3|TACAGTAGTCTGCACATTGG	-		C1orf172|126695	-	-		-	-	-
-	-	-		TMEM14A|28978	MIMAT0004955&MI0005566&hsa-miR-374b-5p&offsets|0|-1|ATATAATACAACCTGCTAAGT	-		FBXO46|23403	-	-		-	-	-
-	-	-		IMPDH1|3614	MIMAT0003249&MI0003591&hsa-miR-584-5p&offsets|0|-1|TTATGGTTTGCCTGGGACTGA	-		DDX54|79039	-	-		-	-	-
-	-	-		SFRS9|8683	MIMAT0004601&MI0000461&hsa-miR-145-3p&offsets|0|-1|GGATTCCTGGAAATACTGTTC	-		HSPA14|51182	-	-		-	-	-
-	-	-		TOP1MT|116447	MIMAT0004502&MI0000086&hsa-miR-28-3p&offsets|0|0|CACTAGATTGTGAGCTCCTGGA	-		SNRPE|6635	-	-		-	-	-
-	-	-		POLR2J|5439	MIMAT0001635&MI0001733&hsa-miR-452-5p&offsets|+3|+1|TGTTTGCAGAGGAAACTGAG	-		NUTF2|10204	-	-		-	-	-
-	-	-		PES1|23481	MIMAT0002808&MI0003127&hsa-miR-511-5p&offsets|0|+1,MIMAT0002808&MI0003127&hsa-miR-511-5p&offsets|0|+1|GTGTCTTTTGCTCTGCAGTCAG	-		ALDOA|226	-	-		-	-	-
-	-	-		MRPL2|51069	MIMAT0000266&MI0000285&hsa-miR-205-5p&offsets|0|-4|TCCTTCATTCCACCGGAG	-		FASTK|10922	-	-		-	-	-
-	-	-		DDA1|79016	MIMAT0000737&MI0000790&hsa-miR-382-5p&offsets|0|0|GAAGTTGTTCGTGGTGGATTCG	-		UBE2O|63893	-	-		-	-	-
-	-	-		MRPL18|29074	MIMAT0000425&MI0000448&hsa-miR-130a-3p&offsets|0|+1|CAGTGCAATGTTAAAAGGGCATT	-		TBL3|10607	-	-		-	-	-
-	-	-		PLXNA3|55558	MIMAT0000763&MI0000814&hsa-miR-338-3p&offsets|0|-1|TCCAGCATCAGTGATTTTGTT	-		MSLN|10232	-	-		-	-	-
-	-	-		LYAR|55646	MIMAT0000727&MI0000782&hsa-miR-374a-5p&offsets|0|-1|TTATAATACAACCTGATAAGT	-		COPA|1314	-	-		-	-	-
-	-	-		IGSF9|57549	MIMAT0004921&MI0005540&hsa-miR-889-3p&offsets|0|0|TTAATATCGGACAACCATTGT	-		KIF1A|547	-	-		-	-	-
-	-	-		KDELR1|10945	MIMAT0000231&MI0000281&hsa-miR-199a-5p&offsets|0|-2,MIMAT0000231&MI0000242&hsa-miR-199a-5p&offsets|0|-2|CCCAGTGTTCAGACTACCTGT	-		IPO13|9670	-	-		-	-	-
-	-	-		EMG1|10436	MIMAT0000510&MI0000542&hsa-miR-320a&offsets|0|0|AAAAGCTGGGTTGAGAGGGCGA	-		TBC1D10B|26000	-	-		-	-	-
-	-	-		U2AF2|11338	MIMAT0004597&MI0000456&hsa-miR-140-3p&offsets|+1|0|ACCACAGGGTAGAACCACGG	-		C12orf32|83695	-	-		-	-	-
-	-	-		U2AF1|7307	MIMAT0002176&MI0002469&hsa-miR-485-3p&offsets|0|0|GTCATACACGGCTCTCCTCTCT	-		PRR14|78994	-	-		-	-	-
-	-	-		PDE7A|5150	MIMAT0000693&MI0000749&hsa-miR-30e-3p&offsets|0|0|CTTTCAGTCGGATGTTTACAGC	-		BUD31|8896	-	-		-	-	-
-	-	-		PDRG1|81572	MIMAT0000231&MI0000281&hsa-miR-199a-5p&offsets|0|-4,MIMAT0000231&MI0000242&hsa-miR-199a-5p&offsets|0|-4|CCCAGTGTTCAGACTACCT	-		EIF2S2|8894	-	-		-	-	-
-	-	-		PPAT|5471	MIMAT0000435&MI0000459&hsa-miR-143-3p&offsets|+1|-1|GAGATGAAGCACTGTAGCT	-		MYBL1|4603	-	-		-	-	-
-	-	-		EPHB2|2048	MIMAT0000232&MI0000281&hsa-miR-199a-3p&offsets|-1|-1,MIMAT0000232&MI0000242&hsa-miR-199a-3p&offsets|-1|-1,MIMAT0004563&MI0000282&hsa-miR-199b-3p&offsets|-1|-1|TACAGTAGTCTGCACATTGGTT	-		TXNL4A|10907	-	-		-	-	-
-	-	-		TMEM201|199953	MIMAT0000510&MI0000542&hsa-miR-320a&offsets|0|+1|AAAAGCTGGGTTGAGAGGGCGAA	-		RBX1|9978	-	-		-	-	-
-	-	-		TRMT6|51605	MIMAT0001639&MI0001735&hsa-miR-409-3p&offsets|-1|0|CGAATGTTGCTCGGTGAACCCCT	-		CSNK1G2|1455	-	-		-	-	-
-	-	-		SMARCB1|6598	MIMAT0000087&MI0000088&hsa-miR-30a-5p&offsets|0|+1|TGTAAACATCCTCGACTGGAAGC	-		TRAP1|10131	-	-		-	-	-
-	-	-		LTBR|4055	MIMAT0004597&MI0000456&hsa-miR-140-3p&offsets|+2|+2|CCACAGGGTAGAACCACGGAC	-		UBE2I|7329	-	-		-	-	-
-	-	-		FAM123B|139285	MIMAT0000232&MI0000281&hsa-miR-199a-3p&offsets|0|0,MIMAT0000232&MI0000242&hsa-miR-199a-3p&offsets|0|0,MIMAT0004563&MI0000282&hsa-miR-199b-3p&offsets|0|0|ACAGTAGTCTGCACATTGGTTA	-		NHP2|55651	-	-		-	-	-
-	-	-		VRK1|7443	MIMAT0026472&MI0000064&hsa-let-7c-3p&offsets|0|-1|CTGTACAACCTTCTAGCTTTC	-		GALNT2|2590	-	-		-	-	-
-	-	-		SNRPB2|6629	MIMAT0004682&MI0000760&hsa-miR-361-3p&offsets|0|0|TCCCCCAGGTGTGATTCTGATTT	-		ZNF672|79894	-	-		-	-	-
-	-	-		USP21|27005	MIMAT0000244&MI0000736&hsa-miR-30c-5p&offsets|0|-3,MIMAT0000244&MI0000254&hsa-miR-30c-5p&offsets|0|-3|TGTAAACATCCTACACTCTC	-		R3HDM1|23518	-	-		-	-	-
-	-	-		CISD1|55847	MIMAT0000077&MI0000078&hsa-miR-22-3p&offsets|0|0|AAGCTGCCAGTTGAAGAACTGT	-		TH1L|51497	-	-		-	-	-
-	-	-		GPS1|2873	MIMAT0000425&MI0000448&hsa-miR-130a-3p&offsets|0|-2|CAGTGCAATGTTAAAAGGGC	-		MRPL34|64981	-	-		-	-	-
-	-	-		SNRPA|6626	MIMAT0004911&MI0005532&hsa-miR-874-3p&offsets|0|+1|CTGCCCTGGCCCGAGGGACCGAC	-		CLPB|81570	-	-		-	-	-
-	-	-		NSMCE2|286053	MIMAT0000692&MI0000749&hsa-miR-30e-5p&offsets|+1|-3|GTAAACATCCTTGACTGG	-		EXOSC3|51010	-	-		-	-	-
-	-	-		TMEM165|55858	MIMAT0000082&MI0000750&hsa-miR-26a-5p&offsets|0|-3,MIMAT0000082&MI0000083&hsa-miR-26a-5p&offsets|0|-3|TTCAAGTAATCCAGGATAG	-		NELF|26012	-	-		-	-	-
-	-	-		B3GALNT2|148789	MIMAT0000078&MI0000079&hsa-miR-23a-3p&offsets|-1|0|AATCACATTGCCAGGGATTTCC	-		UBE2J2|118424	-	-		-	-	-
-	-	-		SPNS1|83985	MIMAT0000693&MI0000749&hsa-miR-30e-3p&offsets|0|-2|CTTTCAGTCGGATGTTTACA	-		CEBPB|1051	-	-		-	-	-
-	-	-		RNASEH1|246243	MIMAT0000274&MI0000293&hsa-miR-217&offsets|0|-1|TACTGCATCAGGAACTGATTGG	-		PKN1|5585	-	-		-	-	-
-	-	-		DYNLL1|8655	MIMAT0000693&MI0000749&hsa-miR-30e-3p&offsets|0|-1|CTTTCAGTCGGATGTTTACAG	-		ATF6B|1388	-	-		-	-	-
-	-	-		CBX1|10951	MIMAT0000693&MI0000749&hsa-miR-30e-3p&offsets|0|-4|CTTTCAGTCGGATGTTTA	-		DTNBP1|84062	-	-		-	-	-
-	-	-		USP18|11274	MIMAT0000099&MI0000103&hsa-miR-101-3p&offsets|-1|-3,MIMAT0000099&MI0000739&hsa-miR-101-3p&offsets|-1|-3|GTACAGTACTGTGATAACT	-		C19orf61|56006	-	-		-	-	-
-	-	-		ACTG1|71	MIMAT0003163&MI0003514&hsa-miR-539-5p&offsets|0|+1|GGAGAAATTATCCTTGGTGTGTT	-		SF3B2|10992	-	-		-	-	-
-	-	-		CHCHD8|51287	MIMAT0000415&MI0000434&hsa-let-7i-5p&offsets|0|+1|TGAGGTAGTAGTTTGTGCTGTTG	-		SLC35B1|10237	-	-		-	-	-
-	-	-		SLC37A1|54020	MIMAT0006789&MI0003782&hsa-miR-1468-5p&offsets|0|+1|CTCCGTTTGCCTGTTTCGCTGA	-		STOML2|30968	-	-		-	-	-
-	-	-		XPOT|11260	MIMAT0000435&MI0000459&hsa-miR-143-3p&offsets|+3|-1|GATGAAGCACTGTAGCT	-		FAM136A|84908	-	-		-	-	-
-	-	-		MPHOSPH10|10199	MIMAT0004911&MI0005532&hsa-miR-874-3p&offsets|0|+2|CTGCCCTGGCCCGAGGGACCGACT	-		TDRKH|11022	-	-		-	-	-
-	-	-		PSMD3|5709	MIMAT0000063&MI0000063&hsa-let-7b-5p&offsets|0|-3|TGAGGTAGTAGGTTGTGTG	-		MTCH1|23787	-	-		-	-	-
-	-	-		TXNDC12|51060	MIMAT0000438&MI0000462&hsa-miR-152-3p&offsets|0|+1|TCAGTGCATGACAGAACTTGGG	-		E4F1|1877	-	-		-	-	-
-	-	-		UPF3B|65109	MIMAT0000418&MI0000439&hsa-miR-23b-3p&offsets|0|+1|ATCACATTGCCAGGGATTACCA	-		TMEM14A|28978	-	-		-	-	-
-	-	-		SEH1L|81929	MIMAT0000077&MI0000078&hsa-miR-22-3p&offsets|-1|0|AAAGCTGCCAGTTGAAGAACTGT	-		SNAP47|116841	-	-		-	-	-
-	-	-		DTX2|113878	MIMAT0004585&MI0000434&hsa-let-7i-3p&offsets|0|-1|CTGCGCAAGCTACTGCCTTGC	-		SFRS2|6427	-	-		-	-	-
-	-	-		TMC6|11322	MIMAT0004673&MI0000735&hsa-miR-29c-5p&offsets|0|-1|TGACCGATTTCTCCTGGTGTT	-		TIMM50|92609	-	-		-	-	-
-	-	-		PSMD7|5713	MIMAT0000063&MI0000063&hsa-let-7b-5p&offsets|+1|-2|GAGGTAGTAGGTTGTGTGG	-		SFPQ|6421	-	-		-	-	-
-	-	-		LY6E|4061	MIMAT0000451&MI0000479&hsa-miR-150-5p&offsets|0|0|TCTCCCAACCCTTGTACCAGTG	-		PRPF19|27339	-	-		-	-	-
-	-	-		LAD1|3898	MIMAT0004767&MI0003137&hsa-miR-193b-5p&offsets|0|0|CGGGGTTTTGAGGGCGAGATGA	-		AKT1S1|84335	-	-		-	-	-
-	-	-		NHP2|55651	MIMAT0003322&MI0003667&hsa-miR-652-3p&offsets|0|+1|AATGGCGCCACTAGGGTTGTGC	-		SRXN1|140809	-	-		-	-	-
-	-	-		SEC61B|10952	MIMAT0000752&MI0000804&hsa-miR-328-3p&offsets|0|-1|CTGGCCCTCTCTGCCCTTCCG	-		ATP5G3|518	-	-		-	-	-
-	-	-		GPI|2821	MIMAT0003329&MI0003675&hsa-miR-411-5p&offsets|0|0|TAGTAGACCGTATAGCGTACG	-		YWHAH|7533	-	-		-	-	-
-	-	-		GALK1|2584	MIMAT0000062&MI0000060&hsa-let-7a-5p&offsets|-1|0|ATGAGGTAGTAGGTTGTATAGTT	-		BRP44|25874	-	-		-	-	-
-	-	-		PPP5C|5536	MIMAT0004597&MI0000456&hsa-miR-140-3p&offsets|+3|+3|CACAGGGTAGAACCACGGACA	-		ELOF1|84337	-	-		-	-	-
-	-	-		PRAF2|11230	MIMAT0000063&MI0000063&hsa-let-7b-5p&offsets|0|-5|TGAGGTAGTAGGTTGTG	-		TRMT1|55621	-	-		-	-	-
-	-	-		ARL6IP1|23204	MIMAT0000063&MI0000063&hsa-let-7b-5p&offsets|+4|0|GTAGTAGGTTGTGTGGTT	-		SMPD4|55627	-	-		-	-	-
-	-	-		SH3BGRL3|83442	MIMAT0005796&MI0003814&hsa-miR-1271-5p&offsets|0|-1|CTTGGCACCTAGCAAGCACTC	-		COX6B1|1340	-	-		-	-	-
-	-	-		KLHDC7B|113730	MIMAT0000087&MI0000088&hsa-miR-30a-5p&offsets|+2|0|TAAACATCCTCGACTGGAAG	-		IFRD2|7866	-	-		-	-	-
-	-	-		TNFRSF12A|51330	MIMAT0000693&MI0000749&hsa-miR-30e-3p&offsets|0|-5,MIMAT0000088&MI0000088&hsa-miR-30a-3p&offsets|0|-5|CTTTCAGTCGGATGTTT	-		ZDHHC16|84287	-	-		-	-	-
-	-	-		MED25|81857	MIMAT0000087&MI0000088&hsa-miR-30a-5p&offsets|+1|+1|GTAAACATCCTCGACTGGAAGC	-		CBX4|8535	-	-		-	-	-
-	-	-		DEDD|9191	MIMAT0000232&MI0000281&hsa-miR-199a-3p&offsets|0|-3,MIMAT0000232&MI0000242&hsa-miR-199a-3p&offsets|0|-3,MIMAT0004563&MI0000282&hsa-miR-199b-3p&offsets|0|-3|ACAGTAGTCTGCACATTGG	-		CORO1B|57175	-	-		-	-	-
-	-	-		ACAT2|39	MIMAT0000067&MI0000067&hsa-let-7f-5p&offsets|0|-4,MIMAT0000067&MI0000068&hsa-let-7f-5p&offsets|0|-4|TGAGGTAGTAGATTGTAT	-		FIBP|9158	-	-		-	-	-
-	-	-		SUMO3|6612	MIMAT0000063&MI0000063&hsa-let-7b-5p&offsets|+4|+1|GTAGTAGGTTGTGTGGTTT	-		GTF3C5|9328	-	-		-	-	-
-	-	-		NFKB2|4791	MIMAT0004599&MI0000459&hsa-miR-143-5p&offsets|0|0|GGTGCAGTGCTGCATCTCTGGT	-		RFX5|5993	-	-		-	-	-
-	-	-		ACTR2|10097	MIMAT0000703&MI0000760&hsa-miR-361-5p&offsets|0|0|TTATCAGAATCTCCAGGGGTAC	-		PLP2|5355	-	-		-	-	-
-	-	-		KLC2|64837	MIMAT0000253&MI0000266&hsa-miR-10a-5p&offsets|+3|-1|CCTGTAGATCCGAATTTGT	-		SNX22|79856	-	-		-	-	-
-	-	-		ADPRHL2|54936	MIMAT0003239&MI0003581&hsa-miR-574-3p&offsets|0|-2|CACGCTCATGCACACACCCA	-		ACTB|60	-	-		-	-	-
-	-	-		PTRH2|51651	MIMAT0004501&MI0000085&hsa-miR-27a-5p&offsets|0|-1|AGGGCTTAGCTGCTTGTGAGC	-		KIAA1949|170954	-	-		-	-	-
-	-	-		LOC388152|388152	MIMAT0000420&MI0000441&hsa-miR-30b-5p&offsets|0|-1|TGTAAACATCCTACACTCAGC	-		SNHG6|641638	-	-		-	-	-
-	-	-		CDK2AP2|10263	MIMAT0000083&MI0000084&hsa-miR-26b-5p&offsets|0|0|TTCAAGTAATTCAGGATAGGT	-		MBOAT7|79143	-	-		-	-	-
-	-	-		TMEM41A|90407	MIMAT0000062&MI0000061&hsa-let-7a-5p&offsets|0|0,MIMAT0000062&MI0000062&hsa-let-7a-5p&offsets|0|0,MIMAT0000062&MI0000060&hsa-let-7a-5p&offsets|0|0|TGAGGTAGTAGGTTGTATAGTT	-		SLC25A44|9673	-	-		-	-	-
-	-	-		SDHC|6391	MIMAT0003249&MI0003591&hsa-miR-584-5p&offsets|0|-2|TTATGGTTTGCCTGGGACTG	-		ISG20L2|81875	-	-		-	-	-
-	-	-		DRAP1|10589	MIMAT0001639&MI0001735&hsa-miR-409-3p&offsets|0|0|GAATGTTGCTCGGTGAACCCCT	-		INTS8|55656	-	-		-	-	-
-	-	-		FARSB|10056	MIMAT0000231&MI0000281&hsa-miR-199a-5p&offsets|0|-3,MIMAT0000231&MI0000242&hsa-miR-199a-5p&offsets|0|-3|CCCAGTGTTCAGACTACCTG	-		TRMT112|51504	-	-		-	-	-
-	-	-		ZDHHC16|84287	MIMAT0000067&MI0000067&hsa-let-7f-5p&offsets|0|+1|TGAGGTAGTAGATTGTATAGTTG	-		CLPTM1L|81037	-	-		-	-	-
-	-	-		PAK1IP1|55003	MI0000281&hsa-mir-199a-2&coords|1|-|172113693|172113716,MI0000242&hsa-mir-199a-1&coords|19|-|10928104|10928127,MI0000282&hsa-mir-199b&coords|9|-|131007023|131007046|TACAGTAGTCTGCACATTGGTTAG	-		NFKBIL1|4795	-	-		-	-	-
-	-	-		KHSRP|8570	MIMAT0000443&MI0000469&hsa-miR-125a-5p&offsets|0|-1|TCCCTGAGACCCTTTAACCTGTG	-		ENSA|2029	-	-		-	-	-
-	-	-		ATP6AP1|537	MIMAT0000099&MI0000103&hsa-miR-101-3p&offsets|0|-2,MIMAT0000099&MI0000739&hsa-miR-101-3p&offsets|0|-2|TACAGTACTGTGATAACTG	-		C1orf86|199990	-	-		-	-	-
-	-	-		YARS2|51067	MIMAT0000067&MI0000067&hsa-let-7f-5p&offsets|0|-1,MIMAT0000067&MI0000068&hsa-let-7f-5p&offsets|0|-1|TGAGGTAGTAGATTGTATAGT	-		NVL|4931	-	-		-	-	-
-	-	-		THOC3|84321	MIMAT0004748&MI0001445&hsa-miR-423-5p&offsets|0|-1|TGAGGGGCAGAGAGCGAGACTT	-		U2AF1|7307	-	-		-	-	-
-	-	-		SLC25A15|10166	MIMAT0001635&MI0001733&hsa-miR-452-5p&offsets|0|+2|AACTGTTTGCAGAGGAAACTGAGA	-		UFD1L|7353	-	-		-	-	-
-	-	-		CDC34|997	MIMAT0000083&MI0000084&hsa-miR-26b-5p&offsets|0|-1|TTCAAGTAATTCAGGATAGG	-		H1FX|8971	-	-		-	-	-
-	-	-		GTPBP2|54676	MIMAT0004703&MI0000816&hsa-miR-335-3p&offsets|0|-1|TTTTTCATTATTGCTCCTGAC	-		NOL7|51406	-	-		-	-	-
-	-	-		IDO1|3620	MIMAT0004482&MI0000063&hsa-let-7b-3p&offsets|0|-2|CTATACAACCTACTGCCTTC	-		AKAP8L|26993	-	-		-	-	-
-	-	-		VEGFA|7422	MIMAT0000425&MI0000448&hsa-miR-130a-3p&offsets|0|0|CAGTGCAATGTTAAAAGGGCAT	-		SLC25A5|292	-	-		-	-	-
-	-	-		CACNB3|784	MIMAT0001638&MI0001735&hsa-miR-409-5p&offsets|0|-2|AGGTTACCCGAGCAACTTTGC	-		KHSRP|8570	-	-		-	-	-
-	-	-		CLPTM1L|81037	MIMAT0000087&MI0000088&hsa-miR-30a-5p&offsets|+1|-1|GTAAACATCCTCGACTGGAA	-		ANP32E|81611	-	-		-	-	-
-	-	-		USP5|8078	MIMAT0000232&MI0000281&hsa-miR-199a-3p&offsets|-1|-4,MIMAT0000232&MI0000242&hsa-miR-199a-3p&offsets|-1|-4,MIMAT0004563&MI0000282&hsa-miR-199b-3p&offsets|-1|-4|TACAGTAGTCTGCACATTG	-		LOC388955|388955	-	-		-	-	-
-	-	-		TMCO1|54499	MIMAT0004808&MI0003639&hsa-miR-625-3p&offsets|0|-1|GACTATAGAACTTTCCCCCTC	-		SOX12|6666	-	-		-	-	-
-	-	-		COX6C|1345	MIMAT0000067&MI0000067&hsa-let-7f-5p&offsets|0|-2,MIMAT0000067&MI0000068&hsa-let-7f-5p&offsets|0|-2|TGAGGTAGTAGATTGTATAG	-		CALU|813	-	-		-	-	-
-	-	-		SLC25A13|10165	MI0000469&hsa-mir-125a&coords|19|+|52196502|52196520|CATGTTGCCAGTCTCTAGG	-		TAP2|6891	-	-		-	-	-
-	-	-		ILF3|3609	MIMAT0003239&MI0003581&hsa-miR-574-3p&offsets|0|0|CACGCTCATGCACACACCCACA	-		ARHGEF1|9138	-	-		-	-	-
-	-	-		SNAP47|116841	MIMAT0004599&MI0000459&hsa-miR-143-5p&offsets|0|-1|GGTGCAGTGCTGCATCTCTGG	-		LSMD1|84316	-	-		-	-	-
-	-	-		ZNRF1|84937	MIMAT0004599&MI0000459&hsa-miR-143-5p&offsets|0|-2|GGTGCAGTGCTGCATCTCTG	-		NUDC|10726	-	-		-	-	-
-	-	-		SRP9|6726	MIMAT0003249&MI0003591&hsa-miR-584-5p&offsets|0|+1|TTATGGTTTGCCTGGGACTGAGG	-		HTATIP2|10553	-	-		-	-	-
-	-	-		FAM110A|83541	MIMAT0000244&MI0000736&hsa-miR-30c-5p&offsets|0|-5,MIMAT0000244&MI0000254&hsa-miR-30c-5p&offsets|0|-5,MIMAT0000420&MI0000441&hsa-miR-30b-5p&offsets|0|-4|TGTAAACATCCTACACTC	-		MYO9B|4650	-	-		-	-	-
-	-	-		TIMM8B|26521	MIMAT0001080&MI0001150&hsa-miR-196b-5p&offsets|0|+1|TAGGTAGTTTCCTGTTGTTGGGA	-		SOD1|6647	-	-		-	-	-
-	-	-		ISOC2|79763	MIMAT0016895&MI0015873&hsa-miR-2355-5p&offsets|0|-1|ATCCCCAGATACAATGGACA	-		MRPS15|64960	-	-		-	-	-
-	-	-		PIGC|5279	MIMAT0000099&MI0000103&hsa-miR-101-3p&offsets|+1|-1,MIMAT0000099&MI0000739&hsa-miR-101-3p&offsets|+1|-1|ACAGTACTGTGATAACTGA	-		ZNRD1|30834	-	-		-	-	-
-	-	-		RTCD1|8634	MIMAT0004927&MI0005543&hsa-miR-708-3p&offsets|0|-1|CAACTAGACTGTGAGCTTCTA	-		PREB|10113	-	-		-	-	-
-	-	-		MRPS18A|55168	MIMAT0000062&MI0000061&hsa-let-7a-5p&offsets|0|+1,MIMAT0000062&MI0000062&hsa-let-7a-5p&offsets|0|+1,MIMAT0000062&MI0000060&hsa-let-7a-5p&offsets|0|+1|TGAGGTAGTAGGTTGTATAGTTT	-		EDEM2|55741	-	-		-	-	-
-	-	-		ZDHHC13|54503	MIMAT0000063&MI0000063&hsa-let-7b-5p&offsets|+3|0|GGTAGTAGGTTGTGTGGTT	-		HNRNPA2B1|3181	-	-		-	-	-
-	-	-		ICT1|3396	MIMAT0000275&MI0000294&hsa-miR-218-5p&offsets|0|+1,MIMAT0000275&MI0000295&hsa-miR-218-5p&offsets|0|+1|TTGTGCTTGATCTAACCATGTG	-		DCI|1632	-	-		-	-	-
-	-	-		MSL3|10943	MIMAT0000274&MI0000293&hsa-miR-217&offsets|0|0|TACTGCATCAGGAACTGATTGGA	-		AP1M1|8907	-	-		-	-	-
-	-	-		PRPF19|27339	MIMAT0000253&MI0000266&hsa-miR-10a-5p&offsets|+2|0|CCCTGTAGATCCGAATTTGTG	-		MRPL53|116540	-	-		-	-	-
-	-	-		RRBP1|6238	MIMAT0026480&MI0000464&hsa-miR-153-5p&offsets|-1|-2|GTCATTTTTGTGATGTTGCAG	-		MAP7D1|55700	-	-		-	-	-
-	-	-		UBASH3B|84959	MIMAT0000437&MI0000461&hsa-miR-145-5p&offsets|0|-5|GTCCAGTTTTCCCAGGAA	-		DGUOK|1716	-	-		-	-	-
-	-	-		EIF3B|8662	MIMAT0000077&MI0000078&hsa-miR-22-3p&offsets|0|-6|AAGCTGCCAGTTGAAG	-		C7orf50|84310	-	-		-	-	-
-	-	-		TEAD2|8463	MIMAT0005794&MI0003780&hsa-miR-1296-5p&offsets|0|0|TTAGGGCCCTGGCTCCATCTCC	-		SSRP1|6749	-	-		-	-	-
-	-	-		CDK2|1017	MIMAT0000067&MI0000067&hsa-let-7f-5p&offsets|0|-3,MIMAT0000067&MI0000068&hsa-let-7f-5p&offsets|0|-3|TGAGGTAGTAGATTGTATA	-		GALE|2582	-	-		-	-	-
-	-	-		PAK4|10298	MIMAT0000083&MI0000084&hsa-miR-26b-5p&offsets|0|+1|TTCAAGTAATTCAGGATAGGTT	-		OCIAD2|132299	-	-		-	-	-
-	-	-		GDI2|2665	MIMAT0004681&MI0000750&hsa-miR-26a-2-3p&offsets|0|0|CCTATTCTTGATTACTTGTTTC	-		PRAF2|11230	-	-		-	-	-
-	-	-		RASSF7|8045	MIMAT0000077&MI0000078&hsa-miR-22-3p&offsets|+1|0|AGCTGCCAGTTGAAGAACTGT	-		ATP5G1|516	-	-		-	-	-
-	-	-		GPX7|2882	MIMAT0004682&MI0000760&hsa-miR-361-3p&offsets|0|-4|TCCCCCAGGTGTGATTCTG	-		AHSA1|10598	-	-		-	-	-
-	-	-		DDX11|1663	MIMAT0004748&MI0001445&hsa-miR-423-5p&offsets|0|0|TGAGGGGCAGAGAGCGAGACTTT	-		DVL3|1857	-	-		-	-	-
-	-	-		C11orf31|280636	MIMAT0000443&MI0000469&hsa-miR-125a-5p&offsets|+1|-2|CCCTGAGACCCTTTAACCTGT	-		TMEM183A|92703	-	-		-	-	-
-	-	-		MOSPD3|64598	MIMAT0004502&MI0000086&hsa-miR-28-3p&offsets|0|-1|CACTAGATTGTGAGCTCCTGG	-		ZC3H18|124245	-	-		-	-	-
-	-	-		ITPA|3704	MIMAT0004766&MI0003129&hsa-miR-146b-3p&offsets|+1|0|GCCCTGTGGACTCAGTTCTGG	-		ATP5C1|509	-	-		-	-	-
-	-	-		TCEB2|6923	MIMAT0000078&MI0000079&hsa-miR-23a-3p&offsets|0|0|ATCACATTGCCAGGGATTTCC	-		CSE1L|1434	-	-		-	-	-
-	-	-		TMEM93|83460	MIMAT0000437&MI0000461&hsa-miR-145-5p&offsets|0|-4|GTCCAGTTTTCCCAGGAAT	-		ADAMTS4|9507	-	-		-	-	-
-	-	-		GMPPA|29926	MIMAT0016895&MI0015873&hsa-miR-2355-5p&offsets|0|0|ATCCCCAGATACAATGGACAA	-		COPG|22820	-	-		-	-	-
-	-	-		AARS|16	MIMAT0000722&MI0000778&hsa-miR-370-3p&offsets|0|0|GCCTGCTGGGGTGGAACCTGGT	-		GPT2|84706	-	-		-	-	-
-	-	-		LSG1|55341	MIMAT0000083&MI0000084&hsa-miR-26b-5p&offsets|0|-2|TTCAAGTAATTCAGGATAG	-		ZNF74|7625	-	-		-	-	-
-	-	-		UXS1|80146	MIMAT0001635&MI0001733&hsa-miR-452-5p&offsets|+2|+2|CTGTTTGCAGAGGAAACTGAGA	-		SLC25A1|6576	-	-		-	-	-
-	-	-		KDM5B|10765	MIMAT0004682&MI0000760&hsa-miR-361-3p&offsets|0|-3|TCCCCCAGGTGTGATTCTGA	-		NDUFV1|4723	-	-		-	-	-
-	-	-		VDAC1|7416	MIMAT0003312&MI0003657&hsa-miR-642a-5p&offsets|0|0|GTCCCTCTCCAAATGTGTCTTG	-		FAM110A|83541	-	-		-	-	-
-	-	-		GOT1|2805	MIMAT0002819&MI0003137&hsa-miR-193b-3p&offsets|0|-1|AACTGGCCCTCAAAGTCCCGC	-		MTA2|9219	-	-		-	-	-
-	-	-		LRRC8D|55144	MIMAT0000066&MI0000066&hsa-let-7e-5p&offsets|0|-2|TGAGGTAGGAGGTTGTATAG	-		TOMM6|100188893	-	-		-	-	-
-	-	-		ADAMTS4|9507	MIMAT0000066&MI0000066&hsa-let-7e-5p&offsets|0|-4|TGAGGTAGGAGGTTGTAT	-		PDE6D|5147	-	-		-	-	-
-	-	-		RPF2|84154	MIMAT0010195&MI0000061&hsa-let-7a-2-3p&offsets|0|-1|CTGTACAGCCTCCTAGCTTTC	-		C9orf69|90120	-	-		-	-	-
-	-	-		FKBP11|51303	MIMAT0000063&MI0000063&hsa-let-7b-5p&offsets|+3|+1|GGTAGTAGGTTGTGTGGTTT	-		COX4NB|10328	-	-		-	-	-
-	-	-		VKORC1|79001	MIMAT0000231&MI0000281&hsa-miR-199a-5p&offsets|+1|0,MIMAT0000231&MI0000242&hsa-miR-199a-5p&offsets|+1|0|CCAGTGTTCAGACTACCTGTTC	-		BAG2|9532	-	-		-	-	-
-	-	-		ALDH1B1|219	MIMAT0000510&MI0000542&hsa-miR-320a&offsets|0|-1|AAAAGCTGGGTTGAGAGGGCG	-		UBE2V2|7336	-	-		-	-	-
-	-	-		GALNT2|2590	MIMAT0000510&MI0000542&hsa-miR-320a&offsets|+1|+2|AAAGCTGGGTTGAGAGGGCGAAA	-		HTRA2|27429	-	-		-	-	-
-	-	-		TIMM10|26519	MIMAT0000086&MI0000087&hsa-miR-29a-3p&offsets|-1|-1|CTAGCACCATCTGAAATCGGTT	-		ATPIF1|93974	-	-		-	-	-
-	-	-		TMEM9|252839	MIMAT0000418&MI0000439&hsa-miR-23b-3p&offsets|0|-1|ATCACATTGCCAGGGATTAC	-		PPP1R14C|81706	-	-		-	-	-
-	-	-		ORAI2|80228	MIMAT0000451&MI0000479&hsa-miR-150-5p&offsets|0|-1|TCTCCCAACCCTTGTACCAGT	-		KIAA0664|23277	-	-		-	-	-
-	-	-		PRKDC|5591	MIMAT0000253&MI0000266&hsa-miR-10a-5p&offsets|+2|-2|CCCTGTAGATCCGAATTTG	-		CARS|833	-	-		-	-	-
-	-	-		SRRT|51593	MIMAT0000444&MI0000471&hsa-miR-126-5p&offsets|0|-2|CATTATTACTTTTGGTACG	-		GRWD1|83743	-	-		-	-	-
-	-	-		MLST8|64223	MIMAT0000451&MI0000479&hsa-miR-150-5p&offsets|0|-3|TCTCCCAACCCTTGTACCA	-		QSOX2|169714	-	-		-	-	-
-	-	-		ARPC1A|10552	MIMAT0000459&MI0000487&hsa-miR-193a-3p&offsets|0|-2|AACTGGCCTACAAAGTCCCA	-		TFB2M|64216	-	-		-	-	-
-	-	-		METTL1|4234	MIMAT0000232&MI0000281&hsa-miR-199a-3p&offsets|+1|0,MIMAT0000232&MI0000242&hsa-miR-199a-3p&offsets|+1|0,MIMAT0004563&MI0000282&hsa-miR-199b-3p&offsets|+1|0|CAGTAGTCTGCACATTGGTTA	-		RRP7A|27341	-	-		-	-	-
-	-	-		RFXANK|8625	MIMAT0000086&MI0000087&hsa-miR-29a-3p&offsets|0|-2|TAGCACCATCTGAAATCGGT	-		DDT|1652	-	-		-	-	-
-	-	-		PPME1|51400	MIMAT0000732&MI0000786&hsa-miR-378a-3p&offsets|-1|0|CACTGGACTTGGAGTCAGAAGG	-		STX6|10228	-	-		-	-	-
-	-	-		KDM2B|84678	MIMAT0000063&MI0000063&hsa-let-7b-5p&offsets|+1|0|GAGGTAGTAGGTTGTGTGGTT	-		GBP5|115362	-	-		-	-	-
-	-	-		TSPAN17|26262	MIMAT0000420&MI0000441&hsa-miR-30b-5p&offsets|0|0|TGTAAACATCCTACACTCAGCT	-		MAF1|84232	-	-		-	-	-
-	-	-		PHTF1|10745	MIMAT0000232&MI0000281&hsa-miR-199a-3p&offsets|0|-4,MIMAT0000232&MI0000242&hsa-miR-199a-3p&offsets|0|-4,MIMAT0004563&MI0000282&hsa-miR-199b-3p&offsets|0|-4|ACAGTAGTCTGCACATTG	-		CKAP2|26586	-	-		-	-	-
-	-	-		RDBP|7936	MIMAT0000244&MI0000736&hsa-miR-30c-5p&offsets|0|0,MIMAT0000244&MI0000254&hsa-miR-30c-5p&offsets|0|0|TGTAAACATCCTACACTCTCAGC	-		PAK1IP1|55003	-	-		-	-	-
-	-	-		RASD2|23551	MIMAT0000431&MI0000456&hsa-miR-140-5p&offsets|0|-1|CAGTGGTTTTACCCTATGGTA	-		SFRS9|8683	-	-		-	-	-
-	-	-		STYXL1|51657	MIMAT0000099&MI0000103&hsa-miR-101-3p&offsets|-1|-1,MIMAT0000099&MI0000739&hsa-miR-101-3p&offsets|-1|-1|GTACAGTACTGTGATAACTGA	-		MST4|51765	-	-		-	-	-
-	-	-		C1orf163|65260	MIMAT0000067&MI0000067&hsa-let-7f-5p&offsets|0|-5,MIMAT0000067&MI0000068&hsa-let-7f-5p&offsets|0|-5|TGAGGTAGTAGATTGTA	-		ANP32B|10541	-	-		-	-	-
-	-	-		B4GALNT4|338707	-	-		RBM34|23029	-	-		-	-	-
-	-	-		KCMF1|56888	-	-		NCS1|23413	-	-		-	-	-
-	-	-		DGKZ|8525	-	-		GSK3A|2931	-	-		-	-	-
-	-	-		DDX56|54606	-	-		COPS7B|64708	-	-		-	-	-
-	-	-		NDUFS6|4726	-	-		SPON2|10417	-	-		-	-	-
-	-	-		SH3GL1|6455	-	-		SEPHS1|22929	-	-		-	-	-
-	-	-		NIPA2|81614	-	-		CBX3|11335	-	-		-	-	-
-	-	-		TMEM223|79064	-	-		C17orf89|284184	-	-		-	-	-
-	-	-		LBR|3930	-	-		TMEM39B|55116	-	-		-	-	-
-	-	-		RRP7A|27341	-	-		NAT15|79903	-	-		-	-	-
-	-	-		EIF5B|9669	-	-		DCBLD1|285761	-	-		-	-	-
-	-	-		C1orf57|84284	-	-		COMMD4|54939	-	-		-	-	-
-	-	-		EIF1AD|84285	-	-		NUDT22|84304	-	-		-	-	-
-	-	-		TRIM27|5987	-	-		C9orf86|55684	-	-		-	-	-
-	-	-		ARPC3|10094	-	-		ATXN2L|11273	-	-		-	-	-
-	-	-		COL1A1|1277	-	-		ARHGEF11|9826	-	-		-	-	-
-	-	-		FBXO6|26270	-	-		PNKP|11284	-	-		-	-	-
-	-	-		HNRNPU|3192	-	-		UBL5|59286	-	-		-	-	-
-	-	-		ACTR3B|57180	-	-		TIMM8B|26521	-	-		-	-	-
-	-	-		NDUFS5|4725	-	-		PIM1|5292	-	-		-	-	-
-	-	-		ROMO1|140823	-	-		ART3|419	-	-		-	-	-
-	-	-		MSLN|10232	-	-		PODXL2|50512	-	-		-	-	-
-	-	-		YTHDF1|54915	-	-		HMG20B|10362	-	-		-	-	-
-	-	-		GOLT1B|51026	-	-		?|10431	-	-		-	-	-
-	-	-		SRM|6723	-	-		PRKCZ|5590	-	-		-	-	-
-	-	-		DBN1|1627	-	-		CCDC90A|63933	-	-		-	-	-
-	-	-		RAC3|5881	-	-		POLRMT|5442	-	-		-	-	-
-	-	-		MAD2L1BP|9587	-	-		GSTP1|2950	-	-		-	-	-
-	-	-		TAP2|6891	-	-		EMD|2010	-	-		-	-	-
-	-	-		PACSIN3|29763	-	-		TRAF7|84231	-	-		-	-	-
-	-	-		CECR5|27440	-	-		CHCHD1|118487	-	-		-	-	-
-	-	-		CHCHD1|118487	-	-		TAP1|6890	-	-		-	-	-
-	-	-		SELS|55829	-	-		SEC61B|10952	-	-		-	-	-
-	-	-		COX7A2|1347	-	-		SIGMAR1|10280	-	-		-	-	-
-	-	-		QSOX2|169714	-	-		CKAP4|10970	-	-		-	-	-
-	-	-		PTCD1|26024	-	-		RNASEH1|246243	-	-		-	-	-
-	-	-		SPHK1|8877	-	-		GMNN|51053	-	-		-	-	-
-	-	-		CAD|790	-	-		PVR|5817	-	-		-	-	-
-	-	-		COX6B1|1340	-	-		SMYD2|56950	-	-		-	-	-
-	-	-		FRAT2|23401	-	-		C7orf27|221927	-	-		-	-	-
-	-	-		CTSD|1509	-	-		PARP10|84875	-	-		-	-	-
-	-	-		MTA2|9219	-	-		BAT2|7916	-	-		-	-	-
-	-	-		CPSF1|29894	-	-		TACO1|51204	-	-		-	-	-
-	-	-		MRPS10|55173	-	-		MRPL41|64975	-	-		-	-	-
-	-	-		CHMP1A|5119	-	-		SUPT5H|6829	-	-		-	-	-
-	-	-		C6orf64|55776	-	-		ANKS6|203286	-	-		-	-	-
-	-	-		SYNGR2|9144	-	-		SIX1|6495	-	-		-	-	-
-	-	-		CCDC123|84902	-	-		TSEN15|116461	-	-		-	-	-
-	-	-		PGAM1|5223	-	-		WDR18|57418	-	-		-	-	-
-	-	-		ADAR|103	-	-		AATF|26574	-	-		-	-	-
-	-	-		COL5A1|1289	-	-		AP4M1|9179	-	-		-	-	-
-	-	-		LIG1|3978	-	-		C16orf53|79447	-	-		-	-	-
-	-	-		MRPL52|122704	-	-		TBCD|6904	-	-		-	-	-
-	-	-		SEPT3|55964	-	-		ILKAP|80895	-	-		-	-	-
-	-	-		TFAP4|7023	-	-		HBXIP|10542	-	-		-	-	-
-	-	-		NIP7|51388	-	-		METRNL|284207	-	-		-	-	-
-	-	-		SPATS2|65244	-	-		NDUFS3|4722	-	-		-	-	-
-	-	-		ASPSCR1|79058	-	-		ZMIZ2|83637	-	-		-	-	-
-	-	-		UNG|7374	-	-		ESRRA|2101	-	-		-	-	-
-	-	-		KIF20B|9585	-	-		PDXK|8566	-	-		-	-	-
-	-	-		B4GALT4|8702	-	-		PIK3R2|5296	-	-		-	-	-
-	-	-		SUMO2|6613	-	-		KEAP1|9817	-	-		-	-	-
-	-	-		NONO|4841	-	-		RGS10|6001	-	-		-	-	-
-	-	-		TFRC|7037	-	-		BAT5|7920	-	-		-	-	-
-	-	-		ZNF787|126208	-	-		VPS28|51160	-	-		-	-	-
-	-	-		NUP205|23165	-	-		LMF2|91289	-	-		-	-	-
-	-	-		SLC3A2|6520	-	-		FURIN|5045	-	-		-	-	-
-	-	-		GTF3C2|2976	-	-		MPST|4357	-	-		-	-	-
-	-	-		ABHD11|83451	-	-		RHPN1|114822	-	-		-	-	-
-	-	-		S100A9|6280	-	-		MAST2|23139	-	-		-	-	-
-	-	-		C3orf1|51300	-	-		ITGB2|3689	-	-		-	-	-
-	-	-		COMMD7|149951	-	-		TOMM5|401505	-	-		-	-	-
-	-	-		RCN2|5955	-	-		CENPB|1059	-	-		-	-	-
-	-	-		HSPA6|3310	-	-		ZNF687|57592	-	-		-	-	-
-	-	-		RBM42|79171	-	-		XPO6|23214	-	-		-	-	-
-	-	-		SEPT9|10801	-	-		PPIH|10465	-	-		-	-	-
-	-	-		C19orf47|126526	-	-		NUMBL|9253	-	-		-	-	-
-	-	-		C19orf53|28974	-	-		CCT7|10574	-	-		-	-	-
-	-	-		ZNF593|51042	-	-		PRPF31|26121	-	-		-	-	-
-	-	-		PPP1R16A|84988	-	-		C6orf47|57827	-	-		-	-	-
-	-	-		CHD1L|9557	-	-		RPN2|6185	-	-		-	-	-
-	-	-		MYD88|4615	-	-		CHFR|55743	-	-		-	-	-
-	-	-		PSMA3|5684	-	-		DDX41|51428	-	-		-	-	-
-	-	-		DNTTIP1|116092	-	-		FADD|8772	-	-		-	-	-
-	-	-		FIBP|9158	-	-		IFI6|2537	-	-		-	-	-
-	-	-		LYZ|4069	-	-		NXT1|29107	-	-		-	-	-
-	-	-		LMO4|8543	-	-		NOP10|55505	-	-		-	-	-
-	-	-		FNDC1|84624	-	-		SF3B5|83443	-	-		-	-	-
-	-	-		C19orf22|91300	-	-		ELK1|2002	-	-		-	-	-
-	-	-		S100A8|6279	-	-		USP39|10713	-	-		-	-	-
-	-	-		CORO1A|11151	-	-		GMPPB|29925	-	-		-	-	-
-	-	-		TBCC|6903	-	-		RBM17|84991	-	-		-	-	-
-	-	-		PABPC3|5042	-	-		FRAT2|23401	-	-		-	-	-
-	-	-		C17orf90|339229	-	-		HIST2H4A|8370	-	-		-	-	-
-	-	-		HIST2H4A|8370	-	-		POLR1C|9533	-	-		-	-	-
-	-	-		NAT9|26151	-	-		CLK2|1196	-	-		-	-	-
-	-	-		CBX4|8535	-	-		PRDX5|25824	-	-		-	-	-
-	-	-		TALDO1|6888	-	-		SKIV2L|6499	-	-		-	-	-
-	-	-		GBP1|2633	-	-		SNHG1|23642	-	-		-	-	-
-	-	-		DNAJA3|9093	-	-		C7orf43|55262	-	-		-	-	-
-	-	-		GNB2|2783	-	-		IRF3|3661	-	-		-	-	-
-	-	-		EPSTI1|94240	-	-		PPARD|5467	-	-		-	-	-
-	-	-		DDX27|55661	-	-		HR|55806	-	-		-	-	-
-	-	-		SMYD2|56950	-	-		GTPBP2|54676	-	-		-	-	-
-	-	-		ERGIC2|51290	-	-		BCAP31|10134	-	-		-	-	-
-	-	-		SUPT5H|6829	-	-		BLOC1S3|388552	-	-		-	-	-
-	-	-		MVD|4597	-	-		VAV2|7410	-	-		-	-	-
-	-	-		TARBP1|6894	-	-		NARFL|64428	-	-		-	-	-
-	-	-		NOLC1|9221	-	-		SLC35B2|347734	-	-		-	-	-
-	-	-		C12orf52|84934	-	-		SNRPF|6636	-	-		-	-	-
-	-	-		C2orf29|55571	-	-		MDFI|4188	-	-		-	-	-
-	-	-		FADD|8772	-	-		CCT8|10694	-	-		-	-	-
-	-	-		EFTUD2|9343	-	-		MRPL48|51642	-	-		-	-	-
-	-	-		C1QBP|708	-	-		ZNHIT1|10467	-	-		-	-	-
-	-	-		HOXC10|3226	-	-		STXBP2|6813	-	-		-	-	-
-	-	-		VBP1|7411	-	-		SLC29A2|3177	-	-		-	-	-
-	-	-		ORAI1|84876	-	-		RSU1|6251	-	-		-	-	-
-	-	-		LSM12|124801	-	-		UQCR10|29796	-	-		-	-	-
-	-	-		GPAA1|8733	-	-		STK19|8859	-	-		-	-	-
-	-	-		HAUS1|115106	-	-		C2orf24|27013	-	-		-	-	-
-	-	-		SEMA4D|10507	-	-		C1orf38|9473	-	-		-	-	-
-	-	-		POLR2G|5436	-	-		TRIB3|57761	-	-		-	-	-
-	-	-		B3GAT3|26229	-	-		INF2|64423	-	-		-	-	-
-	-	-		TCP1|6950	-	-		HYOU1|10525	-	-		-	-	-
-	-	-		HNRNPC|3183	-	-		METTL13|51603	-	-		-	-	-
-	-	-		DPM3|54344	-	-		PCNXL3|399909	-	-		-	-	-
-	-	-		TTC9C|283237	-	-		YIPF3|25844	-	-		-	-	-
-	-	-		CARS2|79587	-	-		PPP5C|5536	-	-		-	-	-
-	-	-		PRR14|78994	-	-		CNOT3|4849	-	-		-	-	-
-	-	-		GNAS|2778	-	-		SDF4|51150	-	-		-	-	-
-	-	-		VAMP8|8673	-	-		FAM100A|124402	-	-		-	-	-
-	-	-		NDUFB2|4708	-	-		PCBP4|57060	-	-		-	-	-
-	-	-		PSMC3|5702	-	-		SEPT9|10801	-	-		-	-	-
-	-	-		PRKCSH|5589	-	-		CHCHD2|51142	-	-		-	-	-
-	-	-		ODF2|4957	-	-		SEC61A1|29927	-	-		-	-	-
-	-	-		SNX8|29886	-	-		PRDX2|7001	-	-		-	-	-
-	-	-		SH3BP5L|80851	-	-		RAB25|57111	-	-		-	-	-
-	-	-		TBC1D22B|55633	-	-		C3orf26|84319	-	-		-	-	-
-	-	-		DCLRE1B|64858	-	-		NMI|9111	-	-		-	-	-
-	-	-		METTL13|51603	-	-		DDRGK1|65992	-	-		-	-	-
-	-	-		UBL5|59286	-	-		C15orf63|25764	-	-		-	-	-
-	-	-		SLC10A3|8273	-	-		TSSC1|7260	-	-		-	-	-
-	-	-		CLPP|8192	-	-		CLTA|1211	-	-		-	-	-
-	-	-		UCHL3|7347	-	-		C1orf131|128061	-	-		-	-	-
-	-	-		OBFC2B|79035	-	-		SIVA1|10572	-	-		-	-	-
-	-	-		BCL9|607	-	-		SPG21|51324	-	-		-	-	-
-	-	-		SNRPD2|6633	-	-		FAM57A|79850	-	-		-	-	-
-	-	-		EPN1|29924	-	-		C19orf29|58509	-	-		-	-	-
-	-	-		MRPS26|64949	-	-		CARS2|79587	-	-		-	-	-
-	-	-		C6orf167|253714	-	-		RAP2B|5912	-	-		-	-	-
-	-	-		NUS1|116150	-	-		LYAR|55646	-	-		-	-	-
-	-	-		PPP2R5D|5528	-	-		SGTA|6449	-	-		-	-	-
-	-	-		TDG|6996	-	-		SLC2A4RG|56731	-	-		-	-	-
-	-	-		RCN3|57333	-	-		OPN3|23596	-	-		-	-	-
-	-	-		ADPGK|83440	-	-		CPNE1|8904	-	-		-	-	-
-	-	-		B3GNT7|93010	-	-		NT5C|30833	-	-		-	-	-
-	-	-		ALG6|29929	-	-		TOMM22|56993	-	-		-	-	-
-	-	-		KIAA0020|9933	-	-		TP53BP2|7159	-	-		-	-	-
-	-	-		C8orf59|401466	-	-		C7orf11|136647	-	-		-	-	-
-	-	-		ADAM15|8751	-	-		RHOT2|89941	-	-		-	-	-
-	-	-		TAF5L|27097	-	-		POLE|5426	-	-		-	-	-
-	-	-		NME2|4831	-	-		SAPS1|22870	-	-		-	-	-
-	-	-		ABCC10|89845	-	-		HEATR7A|727957	-	-		-	-	-
-	-	-		NSDHL|50814	-	-		HSP90AB1|3326	-	-		-	-	-
-	-	-		NANS|54187	-	-		CTDP1|9150	-	-		-	-	-
-	-	-		OST4|100128731	-	-		PNPLA6|10908	-	-		-	-	-
-	-	-		POP4|10775	-	-		PIM3|415116	-	-		-	-	-
-	-	-		FAM86A|196483	-	-		UPF1|5976	-	-		-	-	-
-	-	-		PSMA6|5687	-	-		SRGAP2|23380	-	-		-	-	-
-	-	-		LLGL2|3993	-	-		ARL16|339231	-	-		-	-	-
-	-	-		FLJ23867|200058	-	-		PPPDE2|27351	-	-		-	-	-
-	-	-		VASP|7408	-	-		KIAA0907|22889	-	-		-	-	-
-	-	-		C7orf28A|51622	-	-		B3GNT7|93010	-	-		-	-	-
-	-	-		NFYA|4800	-	-		MRPL3|11222	-	-		-	-	-
-	-	-		UMPS|7372	-	-		RHOG|391	-	-		-	-	-
-	-	-		TMEM161A|54929	-	-		PITRM1|10531	-	-		-	-	-
-	-	-		SLC25A10|1468	-	-		MRS2|57380	-	-		-	-	-
-	-	-		EMD|2010	-	-		USP21|27005	-	-		-	-	-
-	-	-		SLC16A1|6566	-	-		SPINT2|10653	-	-		-	-	-
-	-	-		MRPL38|64978	-	-		PFN2|5217	-	-		-	-	-
-	-	-		METTL11A|28989	-	-		HAUS5|23354	-	-		-	-	-
-	-	-		TTF2|8458	-	-		C19orf70|125988	-	-		-	-	-
-	-	-		CHML|1122	-	-		FKBP2|2286	-	-		-	-	-
-	-	-		NOMO1|23420	-	-		FAM96A|84191	-	-		-	-	-
-	-	-		ATP5G1|516	-	-		TMED3|23423	-	-		-	-	-
-	-	-		TRIM28|10155	-	-		SNX8|29886	-	-		-	-	-
-	-	-		PSMD10|5716	-	-		TKT|7086	-	-		-	-	-
-	-	-		ACTN2|88	-	-		CORO7|79585	-	-		-	-	-
-	-	-		C9orf142|286257	-	-		POLD2|5425	-	-		-	-	-
-	-	-		EPHB3|2049	-	-		PSMA4|5685	-	-		-	-	-
-	-	-		GET4|51608	-	-		WRNIP1|56897	-	-		-	-	-
-	-	-		FKBP4|2288	-	-		CKAP5|9793	-	-		-	-	-
-	-	-		MED26|9441	-	-		HS1BP3|64342	-	-		-	-	-
-	-	-		P4HA2|8974	-	-		CAD|790	-	-		-	-	-
-	-	-		FAM98A|25940	-	-		PSMD7|5713	-	-		-	-	-
-	-	-		FBLIM1|54751	-	-		SIAH2|6478	-	-		-	-	-
-	-	-		ANKRD54|129138	-	-		UCHL5|51377	-	-		-	-	-
-	-	-		IQCG|84223	-	-		DDIT4|54541	-	-		-	-	-
-	-	-		WDR74|54663	-	-		ATP5E|514	-	-		-	-	-
-	-	-		PREP|5550	-	-		NDUFA1|4694	-	-		-	-	-
-	-	-		GLRX3|10539	-	-		BID|637	-	-		-	-	-
-	-	-		MRPS16|51021	-	-		ZDHHC13|54503	-	-		-	-	-
-	-	-		ADIPOR1|51094	-	-		PTRH2|51651	-	-		-	-	-
-	-	-		PIP5K1A|8394	-	-		TRAPPC3|27095	-	-		-	-	-
-	-	-		LIG3|3980	-	-		PSMD9|5715	-	-		-	-	-
-	-	-		CHCHD3|54927	-	-		WDR12|55759	-	-		-	-	-
-	-	-		SLC6A8|6535	-	-		MTG1|92170	-	-		-	-	-
-	-	-		ENAH|55740	-	-		C11orf10|746	-	-		-	-	-
-	-	-		GORASP2|26003	-	-		PDIA3P|171423	-	-		-	-	-
-	-	-		CD24|100133941	-	-		FAM3A|60343	-	-		-	-	-
-	-	-		LSM10|84967	-	-		LMNA|4000	-	-		-	-	-
-	-	-		FAF1|11124	-	-		SPI1|6688	-	-		-	-	-
-	-	-		NAGK|55577	-	-		ABTB2|25841	-	-		-	-	-
-	-	-		LSM1|27257	-	-		TTLL4|9654	-	-		-	-	-
-	-	-		FBXO46|23403	-	-		TMEM51|55092	-	-		-	-	-
-	-	-		HLA-B|3106	-	-		AARS|16	-	-		-	-	-
-	-	-		ADSL|158	-	-		NRBP1|29959	-	-		-	-	-
-	-	-		KIF3C|3797	-	-		VEGFA|7422	-	-		-	-	-
-	-	-		IMP4|92856	-	-		EFHD2|79180	-	-		-	-	-
-	-	-		SECTM1|6398	-	-		RNF220|55182	-	-		-	-	-
-	-	-		PTGES2|80142	-	-		HNRNPM|4670	-	-		-	-	-
-	-	-		RAI14|26064	-	-		TUFT1|7286	-	-		-	-	-
-	-	-		CCDC124|115098	-	-		TXN|7295	-	-		-	-	-
-	-	-		SLC25A32|81034	-	-		DGAT1|8694	-	-		-	-	-
-	-	-		DERL1|79139	-	-		THAP4|51078	-	-		-	-	-
-	-	-		STRBP|55342	-	-		PLEKHM2|23207	-	-		-	-	-
-	-	-		PLCB3|5331	-	-		NDUFS7|374291	-	-		-	-	-
-	-	-		PNPT1|87178	-	-		STRN4|29888	-	-		-	-	-
-	-	-		NMRAL1|57407	-	-		THAP7|80764	-	-		-	-	-
-	-	-		SLMO2|51012	-	-		CCDC123|84902	-	-		-	-	-
-	-	-		UBA1|7317	-	-		MAD2L1BP|9587	-	-		-	-	-
-	-	-		FAM91A1|157769	-	-		RAB13|5872	-	-		-	-	-
-	-	-		BAT2|7916	-	-		DYNLRB1|83658	-	-		-	-	-
-	-	-		PLAC2|257000	-	-		GMDS|2762	-	-		-	-	-
-	-	-		PSMA2|5683	-	-		KLHDC4|54758	-	-		-	-	-
-	-	-		CCHCR1|54535	-	-		C19orf22|91300	-	-		-	-	-
-	-	-		ANAPC7|51434	-	-		POGK|57645	-	-		-	-	-
-	-	-		APRT|353	-	-		SERF2|10169	-	-		-	-	-
-	-	-		DAP|1611	-	-		CDC42EP1|11135	-	-		-	-	-
-	-	-		SFXN1|94081	-	-		COBRA1|25920	-	-		-	-	-
-	-	-		SEPHS2|22928	-	-		VAC14|55697	-	-		-	-	-
-	-	-		UNC93B1|81622	-	-		UCHL1|7345	-	-		-	-	-
-	-	-		WIZ|58525	-	-		ADAM19|8728	-	-		-	-	-
-	-	-		NCL|4691	-	-		STK25|10494	-	-		-	-	-
-	-	-		MRPS15|64960	-	-		MSH6|2956	-	-		-	-	-
-	-	-		CHERP|10523	-	-		BCAS4|55653	-	-		-	-	-
-	-	-		PEX13|5194	-	-		PAK4|10298	-	-		-	-	-
-	-	-		PCNXL3|399909	-	-		EEF1D|1936	-	-		-	-	-
-	-	-		FAM50A|9130	-	-		BTG3|10950	-	-		-	-	-
-	-	-		TH1L|51497	-	-		UBA1|7317	-	-		-	-	-
-	-	-		MRPL23|6150	-	-		SND1|27044	-	-		-	-	-
-	-	-		TIMP1|7076	-	-		TPRA1|131601	-	-		-	-	-
-	-	-		CLTA|1211	-	-		INO80E|283899	-	-		-	-	-
-	-	-		CNPY2|10330	-	-		CDC37|11140	-	-		-	-	-
-	-	-		USP1|7398	-	-		DHX16|8449	-	-		-	-	-
-	-	-		PARN|5073	-	-		MAP2K2|5605	-	-		-	-	-
-	-	-		ELOVL1|64834	-	-		IKBKG|8517	-	-		-	-	-
-	-	-		TMEM51|55092	-	-		NOSIP|51070	-	-		-	-	-
-	-	-		TBC1D1|23216	-	-		CDR2L|30850	-	-		-	-	-
-	-	-		ARHGEF19|128272	-	-		PPAP2C|8612	-	-		-	-	-
-	-	-		SETDB1|9869	-	-		PARVB|29780	-	-		-	-	-
-	-	-		SYNCRIP|10492	-	-		LRRC42|115353	-	-		-	-	-
-	-	-		C16orf13|84326	-	-		TSSC4|10078	-	-		-	-	-
-	-	-		GADD45GIP1|90480	-	-		REXO1|57455	-	-		-	-	-
-	-	-		TNNT1|7138	-	-		DCAF4|26094	-	-		-	-	-
-	-	-		AZI1|22994	-	-		RPIA|22934	-	-		-	-	-
-	-	-		VCP|7415	-	-		CA5BP|340591	-	-		-	-	-
-	-	-		SET|6418	-	-		PHGDH|26227	-	-		-	-	-
-	-	-		YOD1|55432	-	-		PRELID1|27166	-	-		-	-	-
-	-	-		MCM8|84515	-	-		PCNT|5116	-	-		-	-	-
-	-	-		TRAPPC9|83696	-	-		ALDH1B1|219	-	-		-	-	-
-	-	-		KIAA1949|170954	-	-		TSPAN17|26262	-	-		-	-	-
-	-	-		C19orf62|29086	-	-		LPCAT1|79888	-	-		-	-	-
-	-	-		EEF1E1|9521	-	-		PYCR2|29920	-	-		-	-	-
-	-	-		NAA20|51126	-	-		CLPTM1|1209	-	-		-	-	-
-	-	-		DPM2|8818	-	-		HCFC1|3054	-	-		-	-	-
-	-	-		KLF16|83855	-	-		TUBB2C|10383	-	-		-	-	-
-	-	-		MED20|9477	-	-		PMEPA1|56937	-	-		-	-	-
-	-	-		DDX41|51428	-	-		TEAD2|8463	-	-		-	-	-
-	-	-		CDCP1|64866	-	-		GRINA|2907	-	-		-	-	-
-	-	-		UQCR10|29796	-	-		PEX16|9409	-	-		-	-	-
-	-	-		YRDC|79693	-	-		NASP|4678	-	-		-	-	-
-	-	-		TRAF4|9618	-	-		PPOX|5498	-	-		-	-	-
-	-	-		ATAD3B|83858	-	-		AP2A1|160	-	-		-	-	-
-	-	-		EPCAM|4072	-	-		YY1AP1|55249	-	-		-	-	-
-	-	-		EZR|7430	-	-		RANBP3|8498	-	-		-	-	-
-	-	-		CHD7|55636	-	-		TMEM158|25907	-	-		-	-	-
-	-	-		BAT3|7917	-	-		NAT10|55226	-	-		-	-	-
-	-	-		MRPS24|64951	-	-		POP4|10775	-	-		-	-	-
-	-	-		HMGN2|3151	-	-		FAM123B|139285	-	-		-	-	-
-	-	-		TUBB2C|10383	-	-		LRRC14|9684	-	-		-	-	-
-	-	-		NPTX2|4885	-	-		MRPL52|122704	-	-		-	-	-
-	-	-		ARL8A|127829	-	-		RNF5|6048	-	-		-	-	-
-	-	-		C17orf62|79415	-	-		PSMD12|5718	-	-		-	-	-
-	-	-		GLB1|2720	-	-		CACNB3|784	-	-		-	-	-
-	-	-		HEATR3|55027	-	-		SENP3|26168	-	-		-	-	-
-	-	-		ITGAX|3687	-	-		NCF2|4688	-	-		-	-	-
-	-	-		ZNF706|51123	-	-		BACE2|25825	-	-		-	-	-
-	-	-		NDUFAF4|29078	-	-		CCS|9973	-	-		-	-	-
-	-	-		PDZD11|51248	-	-		USMG5|84833	-	-		-	-	-
-	-	-		ACP1|52	-	-		TRMT6|51605	-	-		-	-	-
-	-	-		HSPB11|51668	-	-		IDH3G|3421	-	-		-	-	-
-	-	-		ESRP1|54845	-	-		GDI1|2664	-	-		-	-	-
-	-	-		GNL3L|54552	-	-		CD320|51293	-	-		-	-	-
-	-	-		ARHGDIA|396	-	-		C8orf55|51337	-	-		-	-	-
-	-	-		CEP70|80321	-	-		OST4|100128731	-	-		-	-	-
-	-	-		ATPIF1|93974	-	-		ARFRP1|10139	-	-		-	-	-
-	-	-		PSMD13|5719	-	-		TICAM1|148022	-	-		-	-	-
-	-	-		C19orf24|55009	-	-		NCL|4691	-	-		-	-	-
-	-	-		VRK2|7444	-	-		CNKSR1|10256	-	-		-	-	-
-	-	-		PDCD10|11235	-	-		PABPC3|5042	-	-		-	-	-
-	-	-		TUFT1|7286	-	-		TGFB1|7040	-	-		-	-	-
-	-	-		ATP6V0C|527	-	-		RBM10|8241	-	-		-	-	-
-	-	-		ARF4|378	-	-		NFKB2|4791	-	-		-	-	-
-	-	-		PHGDH|26227	-	-		VASP|7408	-	-		-	-	-
-	-	-		C10orf18|54906	-	-		COL1A1|1277	-	-		-	-	-
-	-	-		POMP|51371	-	-		HAGH|3029	-	-		-	-	-
-	-	-		COMMD4|54939	-	-		FBXW5|54461	-	-		-	-	-
-	-	-		PLCH1|23007	-	-		RABEP2|79874	-	-		-	-	-
-	-	-		PSMD8|5714	-	-		EMG1|10436	-	-		-	-	-
-	-	-		HLA-C|3107	-	-		GFER|2671	-	-		-	-	-
-	-	-		POLR3C|10623	-	-		ZNF428|126299	-	-		-	-	-
-	-	-		PHTF2|57157	-	-		MCAT|27349	-	-		-	-	-
-	-	-		TACO1|51204	-	-		PGBD5|79605	-	-		-	-	-
-	-	-		DUSP12|11266	-	-		VAMP8|8673	-	-		-	-	-
-	-	-		GANAB|23193	-	-		IDO1|3620	-	-		-	-	-
-	-	-		RPS19BP1|91582	-	-		DEDD2|162989	-	-		-	-	-
-	-	-		SPINT2|10653	-	-		ERH|2079	-	-		-	-	-
-	-	-		BSG|682	-	-		ME2|4200	-	-		-	-	-
-	-	-		MAST2|23139	-	-		PPDPF|79144	-	-		-	-	-
-	-	-		MOV10|4343	-	-		KIFC3|3801	-	-		-	-	-
-	-	-		RABAC1|10567	-	-		OLFML2B|25903	-	-		-	-	-
-	-	-		ACOT8|10005	-	-		NDUFB10|4716	-	-		-	-	-
-	-	-		VDAC3|7419	-	-		EIF3B|8662	-	-		-	-	-
-	-	-		LASS2|29956	-	-		ZNF282|8427	-	-		-	-	-
-	-	-		GNB4|59345	-	-		MRPS24|64951	-	-		-	-	-
-	-	-		NCBP1|4686	-	-		HEATR2|54919	-	-		-	-	-
-	-	-		FAM96B|51647	-	-		UBTD1|80019	-	-		-	-	-
-	-	-		DCAF15|90379	-	-		SSX2IP|117178	-	-		-	-	-
-	-	-		C19orf61|56006	-	-		BAT4|7918	-	-		-	-	-
-	-	-		OTUB1|55611	-	-		TSFM|10102	-	-		-	-	-
-	-	-		MORF4L2|9643	-	-		CNPY2|10330	-	-		-	-	-
-	-	-		SLC25A44|9673	-	-		C8orf85|441376	-	-		-	-	-
-	-	-		POLE|5426	-	-		CDK2|1017	-	-		-	-	-
-	-	-		STX3|6809	-	-		MRPS17|51373	-	-		-	-	-
-	-	-		DEK|7913	-	-		HDAC2|3066	-	-		-	-	-
-	-	-		ARPC2|10109	-	-		SF3A2|8175	-	-		-	-	-
-	-	-		NDE1|54820	-	-		SLC12A9|56996	-	-		-	-	-
-	-	-		WDR8|49856	-	-		NENF|29937	-	-		-	-	-
-	-	-		C17orf70|80233	-	-		LILRB4|11006	-	-		-	-	-
-	-	-		ATP13A2|23400	-	-		GPX1|2876	-	-		-	-	-
-	-	-		TMEM214|54867	-	-		POLR2I|5438	-	-		-	-	-
-	-	-		RIOK1|83732	-	-		EFTUD2|9343	-	-		-	-	-
-	-	-		EML4|27436	-	-		KDELR2|11014	-	-		-	-	-
-	-	-		MRPS7|51081	-	-		FGD1|2245	-	-		-	-	-
-	-	-		DCLRE1C|64421	-	-		NME4|4833	-	-		-	-	-
-	-	-		GAR1|54433	-	-		GNL2|29889	-	-		-	-	-
-	-	-		PABPC4|8761	-	-		FBRSL1|57666	-	-		-	-	-
-	-	-		BTG3|10950	-	-		GCDH|2639	-	-		-	-	-
-	-	-		SPTBN2|6712	-	-		AAMP|14	-	-		-	-	-
-	-	-		RNPEP|6051	-	-		PDLIM2|64236	-	-		-	-	-
-	-	-		NDUFB3|4709	-	-		GALNS|2588	-	-		-	-	-
-	-	-		HEATR1|55127	-	-		MRPL21|219927	-	-		-	-	-
-	-	-		THOP1|7064	-	-		SLC35C2|51006	-	-		-	-	-
-	-	-		C1orf77|26097	-	-		FAM109B|150368	-	-		-	-	-
-	-	-		VAV2|7410	-	-		FAM36A|116228	-	-		-	-	-
-	-	-		TRIB3|57761	-	-		PIAS4|51588	-	-		-	-	-
-	-	-		SOX12|6666	-	-		C9orf119|375757	-	-		-	-	-
-	-	-		NCBP2|22916	-	-		NPTX2|4885	-	-		-	-	-
-	-	-		NRBP1|29959	-	-		TP53I13|90313	-	-		-	-	-
-	-	-		FXYD5|53827	-	-		ARL6IP4|51329	-	-		-	-	-
-	-	-		COX8A|1351	-	-		SSR4|6748	-	-		-	-	-
-	-	-		C18orf10|25941	-	-		CTSL2|1515	-	-		-	-	-
-	-	-		SOAT1|6646	-	-		SRP9|6726	-	-		-	-	-
-	-	-		NOL11|25926	-	-		PELP1|27043	-	-		-	-	-
-	-	-		RNF149|284996	-	-		GOT1|2805	-	-		-	-	-
-	-	-		MYO9B|4650	-	-		TMEM9|252839	-	-		-	-	-
-	-	-		ABT1|29777	-	-		ACOT9|23597	-	-		-	-	-
-	-	-		DSC2|1824	-	-		HLA-A|3105	-	-		-	-	-
-	-	-		RPA3|6119	-	-		UNG|7374	-	-		-	-	-
-	-	-		UBAP2|55833	-	-		LY6E|4061	-	-		-	-	-
-	-	-		KARS|3735	-	-		RFNG|5986	-	-		-	-	-
-	-	-		ZFP64|55734	-	-		UTP11L|51118	-	-		-	-	-
-	-	-		STAT1|6772	-	-		GPR89A|653519	-	-		-	-	-
-	-	-		NCAPD3|23310	-	-		JMJD6|23210	-	-		-	-	-
-	-	-		JAK3|3718	-	-		C12orf11|55726	-	-		-	-	-
-	-	-		PTTG1IP|754	-	-		TRMT2A|27037	-	-		-	-	-
-	-	-		RNF114|55905	-	-		ORAI1|84876	-	-		-	-	-
-	-	-		LDHA|3939	-	-		SAP30BP|29115	-	-		-	-	-
-	-	-		AK2|204	-	-		PMPCA|23203	-	-		-	-	-
-	-	-		RDH10|157506	-	-		SSBP1|6742	-	-		-	-	-
-	-	-		NDUFS3|4722	-	-		IL32|9235	-	-		-	-	-
-	-	-		LOC388796|388796	-	-		RPS6KA1|6195	-	-		-	-	-
-	-	-		PAK1|5058	-	-		MAD1L1|8379	-	-		-	-	-
-	-	-		GNPAT|8443	-	-		FAM125A|93343	-	-		-	-	-
-	-	-		SEL1L3|23231	-	-		KNTC1|9735	-	-		-	-	-
-	-	-		C1orf174|339448	-	-		TMEM214|54867	-	-		-	-	-
-	-	-		LYSMD1|388695	-	-		MAPK13|5603	-	-		-	-	-
-	-	-		RRP9|9136	-	-		B4GALT7|11285	-	-		-	-	-
-	-	-		RNF7|9616	-	-		GLRX3|10539	-	-		-	-	-
-	-	-		TMEM70|54968	-	-		PSMD13|5719	-	-		-	-	-
-	-	-		POLR3D|661	-	-		COX17|10063	-	-		-	-	-
-	-	-		BCL3|602	-	-		PSMB1|5689	-	-		-	-	-
-	-	-		MAP4K2|5871	-	-		AHCY|191	-	-		-	-	-
-	-	-		TMEM123|114908	-	-		ATP5I|521	-	-		-	-	-
-	-	-		BAT5|7920	-	-		OPLAH|26873	-	-		-	-	-
-	-	-		YIPF3|25844	-	-		ADRBK1|156	-	-		-	-	-
-	-	-		SMPDL3B|27293	-	-		SF3B14|51639	-	-		-	-	-
-	-	-		TSPO|706	-	-		ARPC2|10109	-	-		-	-	-
-	-	-		TRMT112|51504	-	-		C17orf37|84299	-	-		-	-	-
-	-	-		HAUS5|23354	-	-		SKA2|348235	-	-		-	-	-
-	-	-		NCCRP1|342897	-	-		MCOLN1|57192	-	-		-	-	-
-	-	-		FCGR3A|2214	-	-		C17orf56|146705	-	-		-	-	-
-	-	-		LAS1L|81887	-	-		TOP1MT|116447	-	-		-	-	-
-	-	-		VWA1|64856	-	-		MLLT1|4298	-	-		-	-	-
-	-	-		DCTN5|84516	-	-		MICAL2|9645	-	-		-	-	-
-	-	-		POR|5447	-	-		RAD21|5885	-	-		-	-	-
-	-	-		ABCF3|55324	-	-		PSMD11|5717	-	-		-	-	-
-	-	-		SHB|6461	-	-		SPSB1|80176	-	-		-	-	-
-	-	-		NAA38|51691	-	-		RIOK1|83732	-	-		-	-	-
-	-	-		RFC5|5985	-	-		ICAM1|3383	-	-		-	-	-
-	-	-		PPP1R11|6992	-	-		PHB|5245	-	-		-	-	-
-	-	-		MICALL1|85377	-	-		TYROBP|7305	-	-		-	-	-
-	-	-		HS6ST1|9394	-	-		SLC25A11|8402	-	-		-	-	-
-	-	-		ZC3H18|124245	-	-		CCT6A|908	-	-		-	-	-
-	-	-		NCAPH2|29781	-	-		SLC38A10|124565	-	-		-	-	-
-	-	-		SFRS2|6427	-	-		DIABLO|56616	-	-		-	-	-
-	-	-		PTPN2|5771	-	-		HS6ST1|9394	-	-		-	-	-
-	-	-		MRPL24|79590	-	-		CTSZ|1522	-	-		-	-	-
-	-	-		CCT4|10575	-	-		MBD3|53615	-	-		-	-	-
-	-	-		AMD1|262	-	-		VCP|7415	-	-		-	-	-
-	-	-		HDAC1|3065	-	-		TMED1|11018	-	-		-	-	-
-	-	-		FARP1|10160	-	-		UPF3B|65109	-	-		-	-	-
-	-	-		RCE1|9986	-	-		HLA-H|3136	-	-		-	-	-
-	-	-		CDR2|1039	-	-		MARK2|2011	-	-		-	-	-
-	-	-		SERBP1|26135	-	-		OSBPL3|26031	-	-		-	-	-
-	-	-		FAM195B|348262	-	-		FKBP8|23770	-	-		-	-	-
-	-	-		AIFM1|9131	-	-		AGTRAP|57085	-	-		-	-	-
-	-	-		GYLTL1B|120071	-	-		C8orf33|65265	-	-		-	-	-
-	-	-		C1orf96|126731	-	-		CC2D1B|200014	-	-		-	-	-
-	-	-		HLA-H|3136	-	-		MLL4|9757	-	-		-	-	-
-	-	-		HMOX2|3163	-	-		TNPO2|30000	-	-		-	-	-
-	-	-		HCCS|3052	-	-		GNA15|2769	-	-		-	-	-
-	-	-		COL5A2|1290	-	-		YARS2|51067	-	-		-	-	-
-	-	-		NAA50|80218	-	-		DEK|7913	-	-		-	-	-
-	-	-		TRIT1|54802	-	-		TMEM223|79064	-	-		-	-	-
-	-	-		PPAP2C|8612	-	-		ITPR3|3710	-	-		-	-	-
-	-	-		DDIT4|54541	-	-		AIFM1|9131	-	-		-	-	-
-	-	-		ERO1L|30001	-	-		POLR1A|25885	-	-		-	-	-
-	-	-		CPNE1|8904	-	-		YTHDF1|54915	-	-		-	-	-
-	-	-		CCT2|10576	-	-		ATP5H|10476	-	-		-	-	-
-	-	-		PSMB9|5698	-	-		NDUFA4|4697	-	-		-	-	-
-	-	-		FRMD8|83786	-	-		SNRPD3|6634	-	-		-	-	-
-	-	-		PEX11B|8799	-	-		PDHA1|5160	-	-		-	-	-
-	-	-		NOL7|51406	-	-		EPS15L1|58513	-	-		-	-	-
-	-	-		ZNF687|57592	-	-		MRPS11|64963	-	-		-	-	-
-	-	-		CMPK2|129607	-	-		HPCAL1|3241	-	-		-	-	-
-	-	-		TPRKB|51002	-	-		CSTF2|1478	-	-		-	-	-
-	-	-		ALDOA|226	-	-		SNAPC2|6618	-	-		-	-	-
-	-	-		NOMO3|408050	-	-		SEH1L|81929	-	-		-	-	-
-	-	-		LCMT1|51451	-	-		FADS1|3992	-	-		-	-	-
-	-	-		FAM105B|90268	-	-		CEP250|11190	-	-		-	-	-
-	-	-		STK38|11329	-	-		CORO1A|11151	-	-		-	-	-
-	-	-		ATG3|64422	-	-		ACTR3B|57180	-	-		-	-	-
-	-	-		RHPN1|114822	-	-		TNIP2|79155	-	-		-	-	-
-	-	-		PTPN6|5777	-	-		EPRS|2058	-	-		-	-	-
-	-	-		TUBA4A|7277	-	-		YRDC|79693	-	-		-	-	-
-	-	-		LTV1|84946	-	-		FKBP4|2288	-	-		-	-	-
-	-	-		TUFM|7284	-	-		PRUNE|58497	-	-		-	-	-
-	-	-		FTSJ2|29960	-	-		NEU1|4758	-	-		-	-	-
-	-	-		PREB|10113	-	-		POLR3D|661	-	-		-	-	-
-	-	-		S100A7|6278	-	-		POLR2G|5436	-	-		-	-	-
-	-	-		AEN|64782	-	-		GORASP2|26003	-	-		-	-	-
-	-	-		RHOD|29984	-	-		VANGL1|81839	-	-		-	-	-
-	-	-		AGTRAP|57085	-	-		PLA2G15|23659	-	-		-	-	-
-	-	-		SUMO1|7341	-	-		KIAA1841|84542	-	-		-	-	-
-	-	-		BTF3L4|91408	-	-		ATP5D|513	-	-		-	-	-
-	-	-		MFSD10|10227	-	-		TRAF4|9618	-	-		-	-	-
-	-	-		C17orf49|124944	-	-		RHBDD2|57414	-	-		-	-	-
-	-	-		LOC80154|80154	-	-		ABCF2|10061	-	-		-	-	-
-	-	-		CEBPB|1051	-	-		PTPN6|5777	-	-		-	-	-
-	-	-		MTDH|92140	-	-		C19orf47|126526	-	-		-	-	-
-	-	-		ZNF146|7705	-	-		NDUFB6|4712	-	-		-	-	-
-	-	-		WDR18|57418	-	-		MRPS10|55173	-	-		-	-	-
-	-	-		UBE2A|7319	-	-		GYLTL1B|120071	-	-		-	-	-
-	-	-		SND1|27044	-	-		RRP1B|23076	-	-		-	-	-
-	-	-		LMAN2|10960	-	-		KRT23|25984	-	-		-	-	-
-	-	-		HBXIP|10542	-	-		RFC3|5983	-	-		-	-	-
-	-	-		PDCD6|10016	-	-		FBXO41|150726	-	-		-	-	-
-	-	-		UTP14A|10813	-	-		MTSS1L|92154	-	-		-	-	-
-	-	-		KIAA1609|57707	-	-		C17orf106|100134934	-	-		-	-	-
-	-	-		SPOCK2|9806	-	-		COPS6|10980	-	-		-	-	-
-	-	-		NAE1|8883	-	-		GTF2E2|2961	-	-		-	-	-
-	-	-		AMPD2|271	-	-		SELO|83642	-	-		-	-	-
-	-	-		GLTPD1|80772	-	-		NUDCD1|84955	-	-		-	-	-
-	-	-		HPCAL1|3241	-	-		MRTO4|51154	-	-		-	-	-
-	-	-		DLGAP4|22839	-	-		NANS|54187	-	-		-	-	-
-	-	-		CLNS1A|1207	-	-		DUS3L|56931	-	-		-	-	-
-	-	-		STX10|8677	-	-		AKR1A1|10327	-	-		-	-	-
-	-	-		MST4|51765	-	-		PI4KB|5298	-	-		-	-	-
-	-	-		EIF2AK2|5610	-	-		HN1L|90861	-	-		-	-	-
-	-	-		NOC4L|79050	-	-		MAGEF1|64110	-	-		-	-	-
-	-	-		GLO1|2739	-	-		EPS8L2|64787	-	-		-	-	-
-	-	-		SCYL1|57410	-	-		AIP|9049	-	-		-	-	-
-	-	-		MRPL28|10573	-	-		COL11A2|1302	-	-		-	-	-
-	-	-		SLC4A2|6522	-	-		ZNF512B|57473	-	-		-	-	-
-	-	-		TOPBP1|11073	-	-		ERP27|121506	-	-		-	-	-
-	-	-		IRF7|3665	-	-		BCAT1|586	-	-		-	-	-
-	-	-		TGIF2|60436	-	-		CCM2|83605	-	-		-	-	-
-	-	-		YWHAQ|10971	-	-		CCDC107|203260	-	-		-	-	-
-	-	-		ENSA|2029	-	-		ATG4B|23192	-	-		-	-	-
-	-	-		IER3IP1|51124	-	-		CLEC7A|64581	-	-		-	-	-
-	-	-		CEP250|11190	-	-		STK11IP|114790	-	-		-	-	-
-	-	-		SF3B5|83443	-	-		PL-5283|647087	-	-		-	-	-
-	-	-		LILRB4|11006	-	-		C11orf51|25906	-	-		-	-	-
-	-	-		C11orf41|25758	-	-		FBXO45|200933	-	-		-	-	-
-	-	-		TMEM106C|79022	-	-		C16orf57|79650	-	-		-	-	-
-	-	-		MTPAP|55149	-	-		APOC1|341	-	-		-	-	-
-	-	-		TPD52|7163	-	-		NOL10|79954	-	-		-	-	-
-	-	-		PVRL4|81607	-	-		AK2|204	-	-		-	-	-
-	-	-		NDUFS8|4728	-	-		RNF19B|127544	-	-		-	-	-
-	-	-		NSUN2|54888	-	-		VRK1|7443	-	-		-	-	-
-	-	-		SLC7A1|6541	-	-		PUS7|54517	-	-		-	-	-
-	-	-		NIT2|56954	-	-		PCBP1|5093	-	-		-	-	-
-	-	-		NCSTN|23385	-	-		CLCN5|1184	-	-		-	-	-
-	-	-		PKP3|11187	-	-		GEN1|348654	-	-		-	-	-
-	-	-		OGFOD1|55239	-	-		C14orf156|81892	-	-		-	-	-
-	-	-		NCK2|8440	-	-		KIAA1543|57662	-	-		-	-	-
-	-	-		UBE2F|140739	-	-		EFNA3|1944	-	-		-	-	-
-	-	-		RNF24|11237	-	-		RTCD1|8634	-	-		-	-	-
-	-	-		RPS6KA1|6195	-	-		GMEB2|26205	-	-		-	-	-
-	-	-		CD3EAP|10849	-	-		NDUFA8|4702	-	-		-	-	-
-	-	-		PRPF31|26121	-	-		SNF8|11267	-	-		-	-	-
-	-	-		NUBP2|10101	-	-		HEBP2|23593	-	-		-	-	-
-	-	-		HLA-F|3134	-	-		SPHK1|8877	-	-		-	-	-
-	-	-		BCL7C|9274	-	-		C9orf25|203259	-	-		-	-	-
-	-	-		AURKAIP1|54998	-	-		PSENEN|55851	-	-		-	-	-
-	-	-		NUP37|79023	-	-		SURF4|6836	-	-		-	-	-
-	-	-		PHF19|26147	-	-		AARS2|57505	-	-		-	-	-
-	-	-		C20orf11|54994	-	-		AFG3L2|10939	-	-		-	-	-
-	-	-		ICAM1|3383	-	-		DNAJC11|55735	-	-		-	-	-
-	-	-		RBP1|5947	-	-		TRIP6|7205	-	-		-	-	-
-	-	-		PRUNE|58497	-	-		YEATS2|55689	-	-		-	-	-
-	-	-		NKRF|55922	-	-		GPN1|11321	-	-		-	-	-
-	-	-		C7orf49|78996	-	-		BCS1L|617	-	-		-	-	-
-	-	-		DEF6|50619	-	-		NUP210|23225	-	-		-	-	-
-	-	-		HNRNPF|3185	-	-		EIF2AK1|27102	-	-		-	-	-
-	-	-		CLSTN3|9746	-	-		DERL1|79139	-	-		-	-	-
-	-	-		GPR56|9289	-	-		MAP2K7|5609	-	-		-	-	-
-	-	-		ZNF480|147657	-	-		HSPA5|3309	-	-		-	-	-
-	-	-		OSBPL3|26031	-	-		COPS5|10987	-	-		-	-	-
-	-	-		ARHGEF1|9138	-	-		CISD1|55847	-	-		-	-	-
-	-	-		HNRNPUL1|11100	-	-		QTRT1|81890	-	-		-	-	-
-	-	-		CCDC109B|55013	-	-		LYSMD1|388695	-	-		-	-	-
-	-	-		LSM5|23658	-	-		ARMC7|79637	-	-		-	-	-
-	-	-		VARS2|57176	-	-		NONO|4841	-	-		-	-	-
-	-	-		ATF6B|1388	-	-		MLLT11|10962	-	-		-	-	-
-	-	-		PTK2|5747	-	-		C19orf63|284361	-	-		-	-	-
-	-	-		DOT1L|84444	-	-		KIAA0114|57291	-	-		-	-	-
-	-	-		STT3A|3703	-	-		RAB35|11021	-	-		-	-	-
-	-	-		ENTPD6|955	-	-		FERMT3|83706	-	-		-	-	-
-	-	-		CCNK|8812	-	-		RAI14|26064	-	-		-	-	-
-	-	-		BAZ1A|11177	-	-		MAN1B1|11253	-	-		-	-	-
-	-	-		FPR3|2359	-	-		ZNF768|79724	-	-		-	-	-
-	-	-		FOXC1|2296	-	-		TAF5L|27097	-	-		-	-	-
-	-	-		TRIM26|7726	-	-		WBSCR16|81554	-	-		-	-	-
-	-	-		TTL|150465	-	-		E2F4|1874	-	-		-	-	-
-	-	-		XRCC6|2547	-	-		FAM86A|196483	-	-		-	-	-
-	-	-		CCDC90A|63933	-	-		PSMD1|5707	-	-		-	-	-
-	-	-		SPG21|51324	-	-		C7orf30|115416	-	-		-	-	-
-	-	-		UBD|10537	-	-		HMGN1|3150	-	-		-	-	-
-	-	-		JARID2|3720	-	-		C8orf59|401466	-	-		-	-	-
-	-	-		MGC70857|414919	-	-		NME2|4831	-	-		-	-	-
-	-	-		DCAF4|26094	-	-		TNNT1|7138	-	-		-	-	-
-	-	-		RAB13|5872	-	-		TAF4|6874	-	-		-	-	-
-	-	-		SLC45A4|57210	-	-		MRPS9|64965	-	-		-	-	-
-	-	-		MTIF2|4528	-	-		PRPS2|5634	-	-		-	-	-
-	-	-		NRD1|4898	-	-		SEPT3|55964	-	-		-	-	-
-	-	-		LOC90784|90784	-	-		UNC5B|219699	-	-		-	-	-
-	-	-		NELF|26012	-	-		MRPL49|740	-	-		-	-	-
-	-	-		AARS2|57505	-	-		LMAN2|10960	-	-		-	-	-
-	-	-		C7orf43|55262	-	-		TRAPPC1|58485	-	-		-	-	-
-	-	-		BCL11A|53335	-	-		ACP1|52	-	-		-	-	-
-	-	-		RBM4|5936	-	-		CTNNBL1|56259	-	-		-	-	-
-	-	-		C12orf44|60673	-	-		C1QBP|708	-	-		-	-	-
-	-	-		TRMT12|55039	-	-		MVK|4598	-	-		-	-	-
-	-	-		ZNF428|126299	-	-		CHMP4B|128866	-	-		-	-	-
-	-	-		SBNO2|22904	-	-		ATIC|471	-	-		-	-	-
-	-	-		PSMB10|5699	-	-		NDUFB3|4709	-	-		-	-	-
-	-	-		COX5B|1329	-	-		HSPD1|3329	-	-		-	-	-
-	-	-		POLE3|54107	-	-		C3orf1|51300	-	-		-	-	-
-	-	-		DPM1|8813	-	-		TMEM134|80194	-	-		-	-	-
-	-	-		VAC14|55697	-	-		PSMB7|5695	-	-		-	-	-
-	-	-		GFER|2671	-	-		LASS2|29956	-	-		-	-	-
-	-	-		KIN|22944	-	-		TMEM14B|81853	-	-		-	-	-
-	-	-		MLF1|4291	-	-		KIF3C|3797	-	-		-	-	-
-	-	-		C18orf21|83608	-	-		HMOX1|3162	-	-		-	-	-
-	-	-		NDUFA11|126328	-	-		ZNF692|55657	-	-		-	-	-
-	-	-		ARSB|411	-	-		WHSC1|7468	-	-		-	-	-
-	-	-		ODC1|4953	-	-		PFDN4|5203	-	-		-	-	-
-	-	-		LONP1|9361	-	-		CSTF3|1479	-	-		-	-	-
-	-	-		PLEKHJ1|55111	-	-		VPS37C|55048	-	-		-	-	-
-	-	-		MCAT|27349	-	-		TMEM97|27346	-	-		-	-	-
-	-	-		SMO|6608	-	-		HNRNPU|3192	-	-		-	-	-
-	-	-		SSNA1|8636	-	-		ARRDC1|92714	-	-		-	-	-
-	-	-		CNKSR3|154043	-	-		C7orf28B|221960	-	-		-	-	-
-	-	-		C6orf1|221491	-	-		PPME1|51400	-	-		-	-	-
-	-	-		B3GNT5|84002	-	-		HLA-C|3107	-	-		-	-	-
-	-	-		GAL3ST4|79690	-	-		ANKRD54|129138	-	-		-	-	-
-	-	-		ADRBK1|156	-	-		FPGS|2356	-	-		-	-	-
-	-	-		CSNK1G2|1455	-	-		NPM3|10360	-	-		-	-	-
-	-	-		PSMD1|5707	-	-		TAX1BP3|30851	-	-		-	-	-
-	-	-		IARS|3376	-	-		SMC6|79677	-	-		-	-	-
-	-	-		PELP1|27043	-	-		ATP2A1|487	-	-		-	-	-
-	-	-		HCFC1|3054	-	-		C15orf39|56905	-	-		-	-	-
-	-	-		XPNPEP1|7511	-	-		PSPH|5723	-	-		-	-	-
-	-	-		EIF3C|8663	-	-		KDM2B|84678	-	-		-	-	-
-	-	-		C13orf23|80209	-	-		XPOT|11260	-	-		-	-	-
-	-	-		DEDD2|162989	-	-		MPG|4350	-	-		-	-	-
-	-	-		FAP|2191	-	-		ARL8A|127829	-	-		-	-	-
-	-	-		OVCA2|124641	-	-		C21orf59|56683	-	-		-	-	-
-	-	-		FBXO22|26263	-	-		TMEM106C|79022	-	-		-	-	-
-	-	-		TAF2|6873	-	-		TFG|10342	-	-		-	-	-
-	-	-		PPP2R1A|5518	-	-		HDDC2|51020	-	-		-	-	-
-	-	-		NKIRAS2|28511	-	-		RPL8|6132	-	-		-	-	-
-	-	-		EXOSC1|51013	-	-		B4GALT4|8702	-	-		-	-	-
-	-	-		SLC5A6|8884	-	-		POMP|51371	-	-		-	-	-
-	-	-		SLC39A3|29985	-	-		DMWD|1762	-	-		-	-	-
-	-	-		VCAN|1462	-	-		DARS2|55157	-	-		-	-	-
-	-	-		HLA-DQB1|3119	-	-		FAM98A|25940	-	-		-	-	-
-	-	-		AKT1S1|84335	-	-		LAMP3|27074	-	-		-	-	-
-	-	-		STRN4|29888	-	-		SPTBN2|6712	-	-		-	-	-
-	-	-		CTSB|1508	-	-		SHB|6461	-	-		-	-	-
-	-	-		TRMT61A|115708	-	-		HLA-F|3134	-	-		-	-	-
-	-	-		MTSS1L|92154	-	-		TRIM27|5987	-	-		-	-	-
-	-	-		FUCA2|2519	-	-		DPP9|91039	-	-		-	-	-
-	-	-		STAP2|55620	-	-		MRPS16|51021	-	-		-	-	-
-	-	-		MAP1S|55201	-	-		LARP4B|23185	-	-		-	-	-
-	-	-		PGM3|5238	-	-		SLC37A1|54020	-	-		-	-	-
-	-	-		RCN1|5954	-	-		DYNLT1|6993	-	-		-	-	-
-	-	-		GNAI3|2773	-	-		FAM129B|64855	-	-		-	-	-
-	-	-		COX7B|1349	-	-		SMG7|9887	-	-		-	-	-
-	-	-		NOL6|65083	-	-		PPP2R1A|5518	-	-		-	-	-
-	-	-		TPRN|286262	-	-		C16orf88|400506	-	-		-	-	-
-	-	-		SCAND1|51282	-	-		KCNK5|8645	-	-		-	-	-
-	-	-		MKI67IP|84365	-	-		PQBP1|10084	-	-		-	-	-
-	-	-		BRP44|25874	-	-		LOC84740|84740	-	-		-	-	-
-	-	-		GRN|2896	-	-		UQCRFS1|7386	-	-		-	-	-
-	-	-		GTF3C1|2975	-	-		TBC1D22B|55633	-	-		-	-	-
-	-	-		PFKL|5211	-	-		FPR3|2359	-	-		-	-	-
-	-	-		TMEM48|55706	-	-		C7orf59|389541	-	-		-	-	-
-	-	-		PHB|5245	-	-		SPINT1|6692	-	-		-	-	-
-	-	-		IL2RG|3561	-	-		FAM108A1|81926	-	-		-	-	-
-	-	-		PLIN3|10226	-	-		BRIX1|55299	-	-		-	-	-
-	-	-		EFHD2|79180	-	-		DEF6|50619	-	-		-	-	-
-	-	-		KRI1|65095	-	-		SLC44A2|57153	-	-		-	-	-
-	-	-		C8orf55|51337	-	-		ACP2|53	-	-		-	-	-
-	-	-		NPLOC4|55666	-	-		LSM1|27257	-	-		-	-	-
-	-	-		COPS6|10980	-	-		FZR1|51343	-	-		-	-	-
-	-	-		BACE2|25825	-	-		GUSB|2990	-	-		-	-	-
-	-	-		POSTN|10631	-	-		ATP6AP1|537	-	-		-	-	-
-	-	-		PATL1|219988	-	-		S100A10|6281	-	-		-	-	-
-	-	-		C7orf70|84792	-	-		CLTB|1212	-	-		-	-	-
-	-	-		MTX2|10651	-	-		EEF1E1|9521	-	-		-	-	-
-	-	-		PSMB7|5695	-	-		EXOSC1|51013	-	-		-	-	-
-	-	-		FANCL|55120	-	-		ARL6IP1|23204	-	-		-	-	-
-	-	-		FAM128A|653784	-	-		VBP1|7411	-	-		-	-	-
-	-	-		SSR1|6745	-	-		MESDC1|59274	-	-		-	-	-
-	-	-		B3GALNT1|8706	-	-		STK11|6794	-	-		-	-	-
-	-	-		MOCOS|55034	-	-		NDE1|54820	-	-		-	-	-
-	-	-		FAM60A|58516	-	-		ILVBL|10994	-	-		-	-	-
-	-	-		UTP6|55813	-	-		MRPL18|29074	-	-		-	-	-
-	-	-		WSB2|55884	-	-		UBASH3B|84959	-	-		-	-	-
-	-	-		DIABLO|56616	-	-		ATP1B3|483	-	-		-	-	-
-	-	-		CTSA|5476	-	-		TAZ|6901	-	-		-	-	-
-	-	-		PHF6|84295	-	-		LDHA|3939	-	-		-	-	-
-	-	-		PLP2|5355	-	-		TSR2|90121	-	-		-	-	-
-	-	-		FAM162A|26355	-	-		MYO10|4651	-	-		-	-	-
-	-	-		GORAB|92344	-	-		POLR2D|5433	-	-		-	-	-
-	-	-		PAPSS1|9061	-	-		CDR2|1039	-	-		-	-	-
-	-	-		PRICKLE1|144165	-	-		C2orf7|84279	-	-		-	-	-
-	-	-		MRPL21|219927	-	-		GSDMD|79792	-	-		-	-	-
-	-	-		SCAF1|58506	-	-		DDOST|1650	-	-		-	-	-
-	-	-		XPO1|7514	-	-		PLIN3|10226	-	-		-	-	-
-	-	-		UAP1|6675	-	-		NOTCH1|4851	-	-		-	-	-
-	-	-		BUB3|9184	-	-		PABPC4|8761	-	-		-	-	-
-	-	-		GRWD1|83743	-	-		C1orf57|84284	-	-		-	-	-
-	-	-		PTMS|5763	-	-		XAB2|56949	-	-		-	-	-
-	-	-		ASF1A|25842	-	-		PDIA3|2923	-	-		-	-	-
-	-	-		MRPS11|64963	-	-		B3GALT6|126792	-	-		-	-	-
-	-	-		MOXD1|26002	-	-		MAL2|114569	-	-		-	-	-
-	-	-		FAM129B|64855	-	-		INTS1|26173	-	-		-	-	-
-	-	-		APTX|54840	-	-		SFRS4|6429	-	-		-	-	-
-	-	-		CYHR1|50626	-	-		CTBP1|1487	-	-		-	-	-
-	-	-		ABCD1|215	-	-		EIF2B4|8890	-	-		-	-	-
-	-	-		ATXN7L3|56970	-	-		TMEM65|157378	-	-		-	-	-
-	-	-		RBBP7|5931	-	-		GPKOW|27238	-	-		-	-	-
-	-	-		CARS|833	-	-		NCK2|8440	-	-		-	-	-
-	-	-		ISY1|57461	-	-		THOC3|84321	-	-		-	-	-
-	-	-		LAPTM5|7805	-	-		BMF|90427	-	-		-	-	-
-	-	-		SSSCA1|10534	-	-		BAD|572	-	-		-	-	-
-	-	-		UBE2N|7334	-	-		SDHA|6389	-	-		-	-	-
-	-	-		SLC27A4|10999	-	-		SC65|10609	-	-		-	-	-
-	-	-		LOC221710|221710	-	-		RBM8A|9939	-	-		-	-	-
-	-	-		EHD1|10938	-	-		ARPC1A|10552	-	-		-	-	-
-	-	-		BMP1|649	-	-		TESK1|7016	-	-		-	-	-
-	-	-		CLK2|1196	-	-		UBAP2|55833	-	-		-	-	-
-	-	-		TMED2|10959	-	-		CALML5|51806	-	-		-	-	-
-	-	-		MTMR2|8898	-	-		URB2|9816	-	-		-	-	-
-	-	-		AP1B1|162	-	-		BCL3|602	-	-		-	-	-
-	-	-		SLC12A9|56996	-	-		METTL1|4234	-	-		-	-	-
-	-	-		UBAC2|337867	-	-		ZBTB17|7709	-	-		-	-	-
-	-	-		RNASET2|8635	-	-		SLC25A32|81034	-	-		-	-	-
-	-	-		DTD1|92675	-	-		GNAS|2778	-	-		-	-	-
-	-	-		GMEB2|26205	-	-		FAM32A|26017	-	-		-	-	-
-	-	-		C7orf28B|221960	-	-		GIT1|28964	-	-		-	-	-
-	-	-		DOM3Z|1797	-	-		SARNP|84324	-	-		-	-	-
-	-	-		MGRN1|23295	-	-		PPIA|5478	-	-		-	-	-
-	-	-		MLL4|9757	-	-		TIPRL|261726	-	-		-	-	-
-	-	-		AATF|26574	-	-		RPS21|6227	-	-		-	-	-
-	-	-		FBXO41|150726	-	-		C1orf212|113444	-	-		-	-	-
-	-	-		FIGNL1|63979	-	-		S100A7|6278	-	-		-	-	-
-	-	-		MAP2K2|5605	-	-		TARS|6897	-	-		-	-	-
-	-	-		STAMBP|10617	-	-		SMAGP|57228	-	-		-	-	-
-	-	-		CCAR1|55749	-	-		SBNO2|22904	-	-		-	-	-
-	-	-		TSFM|10102	-	-		TMEM41A|90407	-	-		-	-	-
-	-	-		IFI44|10561	-	-		FARSB|10056	-	-		-	-	-
-	-	-		MSTO1|55154	-	-		PTPN2|5771	-	-		-	-	-
-	-	-		PRKCZ|5590	-	-		SLC39A13|91252	-	-		-	-	-
-	-	-		ITGB2|3689	-	-		GGCT|79017	-	-		-	-	-
-	-	-		SIVA1|10572	-	-		DAPK1|1612	-	-		-	-	-
-	-	-		ADSS|159	-	-		KDELR1|10945	-	-		-	-	-
-	-	-		DGCR14|8220	-	-		PTOV1|53635	-	-		-	-	-
-	-	-		ASNA1|439	-	-		ZNF511|118472	-	-		-	-	-
-	-	-		MAPRE1|22919	-	-		LACTB2|51110	-	-		-	-	-
-	-	-		PPRC1|23082	-	-		CNP|1267	-	-		-	-	-
-	-	-		CNP|1267	-	-		NSMCE2|286053	-	-		-	-	-
-	-	-		C7orf50|84310	-	-		MYBBP1A|10514	-	-		-	-	-
-	-	-		COPS7B|64708	-	-		KDM1A|23028	-	-		-	-	-
-	-	-		C14orf169|79697	-	-		PDE7A|5150	-	-		-	-	-
-	-	-		MRS2|57380	-	-		IDI1|3422	-	-		-	-	-
-	-	-		ZC3H15|55854	-	-		HMGN2|3151	-	-		-	-	-
-	-	-		OAS2|4939	-	-		CISD2|493856	-	-		-	-	-
-	-	-		NAA15|80155	-	-		GLO1|2739	-	-		-	-	-
-	-	-		SRGAP2|23380	-	-		MGRN1|23295	-	-		-	-	-
-	-	-		ACP2|53	-	-		P4HA2|8974	-	-		-	-	-
-	-	-		SLC39A11|201266	-	-		FLYWCH2|114984	-	-		-	-	-
-	-	-		KIAA0415|9907	-	-		CD3EAP|10849	-	-		-	-	-
-	-	-		VPS28|51160	-	-		SLMO2|51012	-	-		-	-	-
-	-	-		TPM4|7171	-	-		WDR85|92715	-	-		-	-	-
-	-	-		FAM128B|80097	-	-		BMP1|649	-	-		-	-	-
-	-	-		TAF10|6881	-	-		COL5A1|1289	-	-		-	-	-
-	-	-		PDXDC1|23042	-	-		NDUFB4|4710	-	-		-	-	-
-	-	-		FASTK|10922	-	-		SLC20A1|6574	-	-		-	-	-
-	-	-		GOT2|2806	-	-		NDUFAF4|29078	-	-		-	-	-
-	-	-		DNM1L|10059	-	-		SETDB1|9869	-	-		-	-	-
-	-	-		PSMB6|5694	-	-		EHBP1L1|254102	-	-		-	-	-
-	-	-		RAB1A|5861	-	-		ORAI2|80228	-	-		-	-	-
-	-	-		KRT16|3868	-	-		CCDC12|151903	-	-		-	-	-
-	-	-		KIAA1804|84451	-	-		SDHAF2|54949	-	-		-	-	-
-	-	-		SNRNP40|9410	-	-		NSUN2|54888	-	-		-	-	-
-	-	-		MOSPD1|56180	-	-		HLA-DRB6|3128	-	-		-	-	-
-	-	-		KIAA0907|22889	-	-		FTHL3|2498	-	-		-	-	-
-	-	-		TPD52L2|7165	-	-		DLGAP4|22839	-	-		-	-	-
-	-	-		EGLN3|112399	-	-		EZR|7430	-	-		-	-	-
[truncated: 7,009 more rows]

## Sheet: S2
Supplementary Table S2: Pathways enriched in the differentially expressed mRNA sets
B/Aa-Normal compared to Wh-Normal
Upregulated
Category	Term	Count	%	Pvalue	Genes	List Total	Pop Hits	Pop Total	Fold Enrichment	Bonferroni	Benjamini	FDR
GOTERM_BP_FAT	GO:0006955~immune response	29	50	2.68928e-16	64135, 3127, 3627, 6891, 6892, 10507, 6890, 3683, 9830, 3106, 3635, 5698, 4940, 5880, 11118, 11119, 916, 27074, 5696, 55824, 115362, 4283, 10475, 6363, 4261, 3669, 84166, 3123, 2533	54	818	9145	6.00392	3.69482e-13	3.69482e-13	3.77476e-13
GOTERM_BP_FAT	GO:0002684~positive regulation of immune system process	20	34.4828	1.42439e-10	64135, 3127, 5880, 3627, 11119, 6891, 914, 916, 6890, 5696, 115362, 55824, 4283, 6363, 3106, 84166, 2533, 3123, 5698, 3635	54	568	9145	5.96309	2.37019e-07	1.1851e-07	2.39638e-07
GOTERM_BP_FAT	GO:0002682~regulation of immune system process	22	37.931	1.19422e-09	64135, 3127, 5880, 3627, 11119, 6891, 914, 916, 6890, 3683, 5696, 115362, 55824, 4283, 10475, 6363, 3106, 84166, 2533, 3123, 5698, 3635	54	808	9145	4.61107	1.98718e-06	6.62395e-07	2.00914e-06
GOTERM_BP_FAT	GO:0019221~cytokine-mediated signaling pathway	15	25.8621	3.64509e-09	3127, 3627, 5696, 4283, 10475, 6363, 4261, 7852, 3106, 3669, 84166, 7185, 3123, 4940, 5698	54	333	9145	7.62846	6.06542e-06	1.51636e-06	6.13245e-06
GOTERM_BP_FAT	GO:0006952~defense response	21	36.2069	8.46535e-09	9435, 64135, 3127, 3627, 10866, 6890, 3683, 5696, 9830, 115362, 4283, 10475, 6363, 4261, 7852, 3106, 3669, 84166, 3123, 4940, 5698	54	810	9145	4.3906	1.40862e-05	2.81727e-06	1.4242e-05
GOTERM_BP_FAT	GO:0071345~cellular response to cytokine stimulus	16	27.5862	1.61521e-08	3127, 3627, 5696, 115362, 4283, 10475, 6363, 4261, 7852, 3106, 3669, 84166, 7185, 3123, 4940, 5698	54	441	9145	6.14428	2.68768e-05	4.47952e-06	2.71741e-05
GOTERM_BP_FAT	GO:0034097~response to cytokine	17	29.3103	1.63646e-08	3127, 3627, 27074, 5696, 115362, 4283, 10475, 6363, 4261, 7852, 3106, 3669, 84166, 7185, 3123, 4940, 5698	54	513	9145	5.61205	2.72303e-05	3.89009e-06	2.75316e-05
GOTERM_BP_FAT	GO:0002250~adaptive immune response	11	18.9655	2.19866e-08	55824, 3127, 6363, 11118, 11119, 6891, 3106, 6890, 27074, 3123, 3635	54	161	9145	11.5706	3.65851e-05	4.57321e-06	3.699e-05
GOTERM_BP_FAT	GO:0071346~cellular response to interferon-gamma	9	15.5172	2.28754e-08	115362, 3127, 10475, 6363, 4261, 3106, 84166, 3123, 4940	54	84	9145	18.1448	3.80639e-05	4.22939e-06	3.84852e-05
GOTERM_BP_FAT	GO:0002252~immune effector process	15	25.8621	5.64078e-08	3127, 64135, 5880, 3627, 11118, 3683, 4283, 10475, 6363, 3106, 3669, 84166, 3123, 4940, 3635	54	413	9145	6.15079	9.38582e-05	9.38621e-06	9.48996e-05
KEGG_PATHWAY	hsa04612:Antigen processing and presentation	8	13.7931	8.91329e-08	3127, 4261, 6891, 3106, 6892, 5993, 6890, 3123	35	48	4044	19.2571	7.93279e-06	7.93279e-06	9.67564e-05
GOTERM_BP_FAT	GO:0034341~response to interferon-gamma	9	15.5172	9.83969e-08	115362, 3127, 10475, 6363, 4261, 3106, 84166, 3123, 4940	54	101	9145	15.0908	0.000163719	1.48847e-05	0.000165541
GOTERM_BP_FAT	GO:0050776~regulation of immune response	16	27.5862	1.55138e-07	64135, 3127, 5880, 11119, 916, 3683, 5696, 55824, 115362, 6363, 3106, 84166, 2533, 3123, 5698, 3635	54	523	9145	5.18094	0.000258117	2.15123e-05	0.000261002
GOTERM_BP_FAT	GO:0050778~positive regulation of immune response	14	24.1379	3.37701e-07	64135, 3127, 11119, 916, 5696, 55824, 115362, 6363, 3106, 84166, 3123, 2533, 5698, 3635	54	404	9145	5.86863	0.000561776	4.32247e-05	0.000568141
GOTERM_BP_FAT	GO:0050852~T cell receptor signaling pathway	9	15.5172	6.5598e-07	55824, 3127, 11119, 916, 3123, 2533, 3635, 5698, 5696	54	129	9145	11.8152	0.00109096	7.79649e-05	0.00110361
GOTERM_BP_FAT	GO:0016032~viral process	18	31.0345	7.46376e-07	64135, 3627, 4312, 6231, 6891, 6890, 27074, 5696, 9830, 4283, 10475, 6363, 7852, 3106, 3669, 84166, 4940, 5698	54	766	9145	3.97955	0.0012412	8.27945e-05	0.00125568
GOTERM_BP_FAT	GO:0044764~multi-organism cellular process	18	31.0345	8.18113e-07	64135, 3627, 4312, 6231, 6891, 6890, 27074, 5696, 9830, 4283, 10475, 6363, 7852, 3106, 3669, 84166, 4940, 5698	54	771	9145	3.95374	0.00136041	8.50802e-05	0.00137637
GOTERM_BP_FAT	GO:0044403~symbiosis, encompassing mutualism through parasitism	18	31.0345	1.0537e-06	64135, 3627, 4312, 6231, 6891, 6890, 27074, 5696, 9830, 4283, 10475, 6363, 7852, 3106, 3669, 84166, 4940, 5698	54	785	9145	3.88323	0.00175181	0.000103133	0.00177271
GOTERM_BP_FAT	GO:0044419~interspecies interaction between organisms	18	31.0345	1.0537e-06	64135, 3627, 4312, 6231, 6891, 6890, 27074, 5696, 9830, 4283, 10475, 6363, 7852, 3106, 3669, 84166, 4940, 5698	54	785	9145	3.88323	0.00175181	0.000103133	0.00177271
GOTERM_BP_FAT	GO:0060333~interferon-gamma-mediated signaling pathway	7	12.069	1.35867e-06	3127, 10475, 4261, 3106, 84166, 3123, 4940	54	62	9145	19.1204	0.00225827	0.000125593	0.00228578
GOTERM_BP_FAT	GO:0050851~antigen receptor-mediated signaling pathway	9	15.5172	1.68201e-06	55824, 3127, 11119, 916, 3123, 2533, 3635, 5698, 5696	54	146	9145	10.4395	0.00279496	0.000147298	0.00282976
GOTERM_BP_FAT	GO:0001816~cytokine production	13	22.4138	1.71343e-06	115362, 64135, 3127, 10475, 6363, 11118, 11119, 914, 3106, 916, 84166, 3123, 3635	54	391	9145	5.63062	0.00284709	0.000142547	0.00288261
GOTERM_BP_FAT	GO:0045087~innate immune response	14	24.1379	1.9247e-06	3127, 64135, 5696, 9830, 115362, 10475, 6363, 4261, 3106, 3669, 84166, 3123, 4940, 5698	54	471	9145	5.03381	0.00319758	0.000152498	0.00323803
GOTERM_MF_FAT	GO:0042605~peptide antigen binding	5	8.62069	3.79251e-06	3127, 3106, 6892, 6890, 3123	48	20	8462	44.0729	0.00109165	0.00109165	0.00503627
GOTERM_BP_FAT	GO:0032609~interferon-gamma production	6	10.3448	3.8985e-06	3127, 11118, 11119, 914, 916, 3123	54	42	9145	24.1931	0.00646611	0.000294825	0.00655857
GOTERM_BP_FAT	GO:0019882~antigen processing and presentation	9	15.5172	4.40463e-06	3127, 6363, 6891, 3106, 6892, 6890, 3123, 5698, 5696	54	166	9145	9.18173	0.00730252	0.000318615	0.00741002
KEGG_PATHWAY	hsa05340:Primary immunodeficiency	5	8.62069	5.32818e-06	4261, 6891, 5993, 916, 6890	35	15	4044	38.5143	0.000474097	0.000237077	0.00578375
GOTERM_BP_FAT	GO:0050900~leukocyte migration	10	17.2414	5.42064e-06	4283, 5880, 3627, 6363, 4312, 914, 7852, 5420, 3683, 3635	54	228	9145	7.42771	0.00897942	0.000375762	0.00911922
GOTERM_MF_FAT	GO:0046977~TAP binding	4	6.89655	5.53455e-06	6891, 3106, 6892, 6890	48	7	8462	100.738	0.00159269	0.00079666	0.00734953
GOTERM_BP_FAT	GO:0048584~positive regulation of response to stimulus	21	36.2069	1.03339e-05	64135, 3127, 5880, 3627, 51379, 11119, 10507, 916, 5696, 115362, 55824, 4283, 10475, 6363, 7852, 3106, 84166, 2533, 3123, 5698, 3635	54	1252	9145	2.84057	0.0170487	0.00068759	0.0173841
GOTERM_BP_FAT	GO:0070486~leukocyte aggregation	10	17.2414	1.38365e-05	55824, 3127, 5880, 6363, 11119, 914, 10507, 916, 3683, 3123	54	256	9145	6.61531	0.022761	0.000885148	0.0232757
GOTERM_BP_FAT	GO:0019885~antigen processing and presentation of endogenous peptide antigen via MHC class I	4	6.89655	1.50666e-05	6891, 3106, 6892, 6890	54	9	9145	75.2675	0.0247593	0.000928123	0.0253447
GOTERM_BP_FAT	GO:0050663~cytokine secretion	7	12.069	1.66027e-05	115362, 3127, 6363, 11118, 11119, 914, 3123	54	95	9145	12.4786	0.027249	0.000986195	0.0279284
GOTERM_BP_FAT	GO:0048002~antigen processing and presentation of peptide antigen	8	13.7931	1.82539e-05	3127, 6891, 3106, 6892, 6890, 3123, 5698, 5696	54	145	9145	9.34355	0.0299181	0.00104686	0.0307057
GOTERM_BP_FAT	GO:0002483~antigen processing and presentation of endogenous peptide antigen	4	6.89655	2.14355e-05	6891, 3106, 6892, 6890	54	10	9145	67.7407	0.0350404	0.00118826	0.0360566
GOTERM_BP_FAT	GO:0009615~response to virus	9	15.5172	2.22362e-05	64135, 4283, 10475, 3627, 6363, 7852, 3669, 84166, 4940	54	207	9145	7.36312	0.0363252	0.00119288	0.0374032
GOTERM_BP_FAT	GO:0007166~cell surface receptor signaling pathway	23	39.6552	2.28678e-05	3127, 3627, 11119, 914, 10507, 916, 3683, 5696, 55824, 4283, 10475, 6363, 4261, 7852, 3106, 3669, 84166, 7185, 2533, 3123, 4940, 5698, 3635	54	1560	9145	2.49685	0.0373376	0.00118843	0.0384656
GOTERM_BP_FAT	GO:0002429~immune response-activating cell surface receptor signaling pathway	9	15.5172	2.38344e-05	55824, 3127, 11119, 916, 3123, 2533, 3635, 5698, 5696	54	209	9145	7.29266	0.0388847	0.00120112	0.040091
GOTERM_BP_FAT	GO:0007159~leukocyte cell-cell adhesion	10	17.2414	2.74466e-05	55824, 3127, 5880, 6363, 11119, 914, 10507, 916, 3683, 3123	54	279	9145	6.06996	0.0446445	0.00134239	0.0461657
GOTERM_BP_FAT	GO:0019883~antigen processing and presentation of endogenous antigen	4	6.89655	2.9353e-05	6891, 3106, 6892, 6890	54	11	9145	61.5825	0.0476705	0.00139457	0.0493717
GOTERM_BP_FAT	GO:0001817~regulation of cytokine production	11	18.9655	3.4673e-05	115362, 3127, 64135, 10475, 6363, 914, 3106, 916, 84166, 3123, 3635	54	361	9145	5.16031	0.056064	0.00160141	0.0583174
GOTERM_BP_FAT	GO:0043207~response to external biotic stimulus	12	20.6897	3.65993e-05	3127, 64135, 4283, 10475, 3627, 6363, 7852, 3106, 3669, 84166, 3123, 4940	54	443	9145	4.58741	0.0590849	0.00164466	0.0615563
GOTERM_BP_FAT	GO:0051707~response to other organism	12	20.6897	3.65993e-05	3127, 64135, 4283, 10475, 3627, 6363, 7852, 3106, 3669, 84166, 3123, 4940	54	443	9145	4.58741	0.0590849	0.00164466	0.0615563
GOTERM_BP_FAT	GO:0002768~immune response-regulating cell surface receptor signaling pathway	9	15.5172	5.18699e-05	55824, 3127, 11119, 916, 3123, 2533, 3635, 5698, 5696	54	233	9145	6.54149	0.0826936	0.00226884	0.0872293
GOTERM_BP_FAT	GO:0002757~immune response-activating signal transduction	10	17.2414	5.95524e-05	55824, 3127, 64135, 11119, 916, 3123, 2533, 3635, 5698, 5696	54	308	9145	5.49844	0.0943461	0.00253775	0.100143
GOTERM_BP_FAT	GO:0009607~response to biotic stimulus	12	20.6897	6.28398e-05	3127, 64135, 4283, 10475, 3627, 6363, 7852, 3106, 3669, 84166, 3123, 4940	54	470	9145	4.32388	0.099287	0.0026108	0.105668
GOTERM_BP_FAT	GO:0002474~antigen processing and presentation of peptide antigen via MHC class I	6	10.3448	8.26439e-05	6891, 3106, 6892, 6890, 5698, 5696	54	78	9145	13.0271	0.128487	0.00334865	0.138948
GOTERM_CC_FAT	GO:0042825~TAP complex	3	5.17241	8.47666e-05	6891, 6892, 6890	47	3	8545	181.809	0.0148923	0.0148923	0.104068
GOTERM_BP_FAT	GO:0042110~T cell activation	9	15.5172	8.52196e-05	55824, 3127, 5880, 6363, 11119, 914, 916, 3683, 3123	54	250	9145	6.09667	0.132215	0.00337077	0.143275
GOTERM_BP_FAT	GO:0070489~T cell aggregation	9	15.5172	8.52196e-05	55824, 3127, 5880, 6363, 11119, 914, 916, 3683, 3123	54	250	9145	6.09667	0.132215	0.00337077	0.143275
GOTERM_BP_FAT	GO:0071593~lymphocyte aggregation	9	15.5172	8.76364e-05	55824, 3127, 5880, 6363, 11119, 914, 916, 3683, 3123	54	251	9145	6.07238	0.135698	0.00338573	0.147336
GOTERM_CC_FAT	GO:0005887~integral component of plasma membrane	13	22.4138	8.78701e-05	55824, 419, 8645, 914, 10507, 3106, 916, 5420, 6890, 3683, 362, 3123, 489	47	630	8545	3.7516	0.0154334	0.00774668	0.107877
GOTERM_MF_FAT	GO:0015433~peptide antigen-transporting ATPase activity	3	5.17241	9.02692e-05	6891, 6892, 6890	48	3	8462	176.292	0.0256636	0.00862879	0.119809
GOTERM_MF_FAT	GO:0015440~peptide-transporting ATPase activity	3	5.17241	9.02692e-05	6891, 6892, 6890	48	3	8462	176.292	0.0256636	0.00862879	0.119809
GOTERM_BP_FAT	GO:0006954~inflammatory response	10	17.2414	9.45112e-05	9435, 115362, 3127, 4283, 3627, 6363, 4261, 7852, 3683, 3123	54	327	9145	5.17896	0.14553	0.00356803	0.158885
KEGG_PATHWAY	hsa05168:Herpes simplex infection	8	13.7931	0.000104848	3127, 64135, 6891, 3106, 6890, 7185, 3123, 4940	35	136	4044	6.79664	0.00928855	0.00310582	0.113757
GOTERM_MF_FAT	GO:0003823~antigen binding	5	8.62069	0.000105354	3127, 3106, 6892, 6890, 3123	48	45	8462	19.588	0.0298877	0.00755715	0.139817
GOTERM_BP_FAT	GO:0002764~immune response-regulating signaling pathway	10	17.2414	0.000106157	55824, 3127, 64135, 11119, 916, 3123, 2533, 3635, 5698, 5696	54	332	9145	5.10096	0.16193	0.00391795	0.178447
GOTERM_BP_FAT	GO:0046651~lymphocyte proliferation	7	12.069	0.000110745	3127, 5880, 6363, 11119, 916, 3123, 3635	54	133	9145	8.91326	0.168305	0.00399827	0.186152
GOTERM_BP_FAT	GO:0002478~antigen processing and presentation of exogenous peptide antigen	7	12.069	0.000115425	3127, 6891, 3106, 6890, 3123, 5698, 5696	54	134	9145	8.84674	0.174758	0.00407843	0.194012
GOTERM_BP_FAT	GO:0002253~activation of immune response	10	17.2414	0.000116322	55824, 3127, 64135, 11119, 916, 3123, 2533, 3635, 5698, 5696	54	336	9145	5.04023	0.175989	0.00402461	0.195518
GOTERM_BP_FAT	GO:0032943~mononuclear cell proliferation	7	12.069	0.000120261	3127, 5880, 6363, 11119, 916, 3123, 3635	54	135	9145	8.78121	0.181373	0.00407589	0.202133
GOTERM_BP_FAT	GO:0019884~antigen processing and presentation of exogenous antigen	7	12.069	0.000125258	3127, 6891, 3106, 6890, 3123, 5698, 5696	54	136	9145	8.71664	0.188152	0.00416015	0.210523
GOTERM_BP_FAT	GO:0016337~single organismal cell-cell adhesion	11	18.9655	0.0001419	55824, 3127, 5880, 6363, 11119, 914, 10507, 916, 5420, 3683, 3123	54	427	9145	4.36269	0.210328	0.00461946	0.238462
GOTERM_CC_FAT	GO:0031226~intrinsic component of plasma membrane	13	22.4138	0.000145466	55824, 419, 8645, 914, 10507, 3106, 916, 5420, 6890, 3683, 362, 3123, 489	47	664	8545	3.5595	0.0254207	0.0085464	0.178528
GOTERM_BP_FAT	GO:0070661~leukocyte proliferation	7	12.069	0.000158808	3127, 5880, 6363, 11119, 916, 3123, 3635	54	142	9145	8.34833	0.23224	0.00506938	0.266841
GOTERM_CC_FAT	GO:0042824~MHC class I peptide loading complex	3	5.17241	0.000168951	6891, 6892, 6890	47	4	8545	136.356	0.0294641	0.00744884	0.207323
GOTERM_BP_FAT	GO:0046649~lymphocyte activation	10	17.2414	0.000172794	55824, 3127, 5880, 6363, 11119, 914, 916, 3683, 3123, 3635	54	354	9145	4.78395	0.249903	0.00541084	0.290308
GOTERM_MF_FAT	GO:0046978~TAP1 binding	3	5.17241	0.000179898	6891, 6892, 6890	48	4	8462	132.219	0.0504959	0.0103096	0.238638
GOTERM_BP_FAT	GO:0051607~defense response to virus	7	12.069	0.000222102	64135, 4283, 10475, 3627, 3669, 84166, 4940	54	151	9145	7.85075	0.309002	0.00682142	0.373005
GOTERM_BP_FAT	GO:0022407~regulation of cell-cell adhesion	8	13.7931	0.000254938	55824, 3127, 5880, 6363, 914, 916, 5420, 3123	54	220	9145	6.15825	0.345753	0.00768433	0.428039
GOTERM_BP_FAT	GO:0051249~regulation of lymphocyte activation	8	13.7931	0.000262113	55824, 3127, 5880, 6363, 914, 916, 3123, 3635	54	221	9145	6.13038	0.35352	0.00775925	0.440061
GOTERM_CC_FAT	GO:0098553~lumenal side of endoplasmic reticulum membrane	4	6.89655	0.000273028	3127, 3106, 6892, 3123	47	24	8545	30.3014	0.0471832	0.00961995	0.334842
GOTERM_CC_FAT	GO:0071556~integral component of lumenal side of endoplasmic reticulum membrane	4	6.89655	0.000273028	3127, 3106, 6892, 3123	47	24	8545	30.3014	0.0471832	0.00961995	0.334842
GOTERM_CC_FAT	GO:0009986~cell surface	10	17.2414	0.000274106	3127, 4283, 3627, 4261, 914, 7852, 3106, 916, 3683, 3123	47	409	8545	4.4452	0.0473649	0.00805462	0.336161
GOTERM_BP_FAT	GO:0060337~type I interferon signaling pathway	5	8.62069	0.000275567	3106, 3669, 84166, 4940, 5696	54	55	9145	15.3956	0.367836	0.00801344	0.4626
GOTERM_BP_FAT	GO:0071357~cellular response to type I interferon	5	8.62069	0.000275567	3106, 3669, 84166, 4940, 5696	54	55	9145	15.3956	0.367836	0.00801344	0.4626
GOTERM_BP_FAT	GO:0050670~regulation of lymphocyte proliferation	6	10.3448	0.00030722	3127, 5880, 6363, 916, 3123, 3635	54	103	9145	9.86516	0.40028	0.00877665	0.515608
GOTERM_CC_FAT	GO:0098552~side of membrane	8	13.7931	0.000308558	3127, 4283, 3627, 914, 3106, 6892, 916, 3123	47	246	8545	5.91247	0.0531582	0.00777295	0.37834
GOTERM_BP_FAT	GO:0032944~regulation of mononuclear cell proliferation	6	10.3448	0.000321329	3127, 5880, 6363, 916, 3123, 3635	54	104	9145	9.7703	0.4142	0.00902307	0.539227
GOTERM_BP_FAT	GO:0002484~antigen processing and presentation of endogenous peptide antigen via MHC class I via ER pathway	3	5.17241	0.000325917	6891, 3106, 6890	54	5	9145	101.611	0.418657	0.0089995	0.546906
GOTERM_CC_FAT	GO:0009897~external side of plasma membrane	6	10.3448	0.00032924	3127, 4283, 3627, 914, 916, 3123	47	113	8545	9.65355	0.056619	0.00725916	0.403652
GOTERM_BP_FAT	GO:0098602~single organism cell adhesion	11	18.9655	0.000348522	55824, 3127, 5880, 6363, 11119, 914, 10507, 916, 5420, 3683, 3123	54	477	9145	3.90539	0.440125	0.00946381	0.584734
GOTERM_BP_FAT	GO:0050863~regulation of T cell activation	7	12.069	0.00035851	55824, 3127, 5880, 6363, 914, 916, 3123	54	165	9145	7.18462	0.449357	0.00957752	0.601444
GOTERM_BP_FAT	GO:0034340~response to type I interferon	5	8.62069	0.000361497	3106, 3669, 84166, 4940, 5696	54	59	9145	14.3519	0.452088	0.00950439	0.606441
GOTERM_BP_FAT	GO:0070663~regulation of leukocyte proliferation	6	10.3448	0.000382741	3127, 5880, 6363, 916, 3123, 3635	54	108	9145	9.40844	0.471125	0.00990381	0.641972
KEGG_PATHWAY	hsa05416:Viral myocarditis	5	8.62069	0.000407785	3127, 5880, 3106, 3683, 3123	35	43	4044	13.4352	0.0356493	0.009034	0.441774
GOTERM_CC_FAT	GO:0030176~integral component of endoplasmic reticulum membrane	6	10.3448	0.000418239	3127, 6891, 3106, 6892, 6890, 3123	47	119	8545	9.16682	0.0713689	0.00819333	0.512508
GOTERM_CC_FAT	GO:0031227~intrinsic component of endoplasmic reticulum membrane	6	10.3448	0.000451608	3127, 6891, 3106, 6892, 6890, 3123	47	121	8545	9.0153	0.07684	0.00796339	0.553295
GOTERM_BP_FAT	GO:1903037~regulation of leukocyte cell-cell adhesion	7	12.069	0.000476134	55824, 3127, 5880, 6363, 914, 916, 3123	54	174	9145	6.81301	0.547277	0.0121179	0.79803
GOTERM_BP_FAT	GO:0070098~chemokine-mediated signaling pathway	4	6.89655	0.000487324	4283, 3627, 6363, 7852	54	27	9145	25.0892	0.555633	0.0122143	0.816712
GOTERM_BP_FAT	GO:0002460~adaptive immune response based on somatic recombination of immune receptors built from immunoglobulin superfamily domains	6	10.3448	0.000491028	3127, 6363, 11118, 3106, 3123, 3635	54	114	9145	8.91326	0.558365	0.012124	0.822897
GOTERM_BP_FAT	GO:0045321~leukocyte activation	10	17.2414	0.000522195	55824, 3127, 5880, 6363, 11119, 914, 916, 3683, 3123, 3635	54	411	9145	4.12048	0.580696	0.0127004	0.874913
GOTERM_BP_FAT	GO:0050920~regulation of chemotaxis	6	10.3448	0.000553128	4283, 5880, 3627, 6363, 10507, 7852	54	117	9145	8.68471	0.601744	0.0132543	0.926513
GOTERM_BP_FAT	GO:0030155~regulation of cell adhesion	10	17.2414	0.000560236	55824, 3127, 5880, 6363, 9806, 914, 10507, 916, 5420, 3123	54	415	9145	4.08077	0.606429	0.013233	0.938366
GOTERM_MF_FAT	GO:0042626~ATPase activity, coupled to transmembrane movement of substances	5	8.62069	0.000585775	6891, 6892, 6890, 489, 10396	48	70	8462	12.5923	0.155282	0.0277336	0.775106
GOTERM_BP_FAT	GO:0002694~regulation of leukocyte activation	8	13.7931	0.000607454	55824, 3127, 5880, 6363, 914, 916, 3123, 3635	54	254	9145	5.33392	0.636185	0.0141401	1.01707
GOTERM_BP_FAT	GO:0001775~cell activation	11	18.9655	0.000610351	55824, 3127, 5880, 3627, 6363, 11119, 914, 916, 3683, 3123, 3635	54	512	9145	3.63842	0.637936	0.0140111	1.0219
GOTERM_MF_FAT	GO:0016820~hydrolase activity, acting on acid anhydrides, catalyzing transmembrane movement of substances	5	8.62069	0.000618235	6891, 6892, 6890, 489, 10396	48	71	8462	12.4149	0.163147	0.0251228	0.817895
GOTERM_BP_FAT	GO:0002579~positive regulation of antigen processing and presentation	3	5.17241	0.000679352	6363, 6891, 6890	54	7	9145	72.5794	0.677233	0.0153714	1.13681
GOTERM_MF_FAT	GO:0015399~primary active transmembrane transporter activity	5	8.62069	0.000840379	6891, 6892, 6890, 489, 10396	48	77	8462	11.4475	0.215047	0.0298129	1.11027
GOTERM_MF_FAT	GO:0015405~P-P-bond-hydrolysis-driven transmembrane transporter activity	5	8.62069	0.000840379	6891, 6892, 6890, 489, 10396	48	77	8462	11.4475	0.215047	0.0298129	1.11027
GOTERM_BP_FAT	GO:0016045~detection of bacterium	3	5.17241	0.000902441	3127, 3106, 3123	54	8	9145	63.5069	0.777391	0.0200972	1.50746
GOTERM_MF_FAT	GO:0005102~receptor binding	13	22.4138	0.00094351	3627, 914, 6891, 10507, 6892, 916, 6890, 55824, 4283, 6363, 3106, 7185, 2533	48	787	8462	2.91206	0.238038	0.0297549	1.24573
GOTERM_MF_FAT	GO:0043492~ATPase activity, coupled to movement of substances	5	8.62069	0.00101657	6891, 6892, 6890, 489, 10396	48	81	8462	10.8822	0.253919	0.0288672	1.34159
GOTERM_BP_FAT	GO:0050865~regulation of cell activation	8	13.7931	0.00103498	55824, 3127, 5880, 6363, 914, 916, 3123, 3635	54	278	9145	4.87343	0.821489	0.0227128	1.72705
GOTERM_BP_FAT	GO:0050792~regulation of viral process	7	12.069	0.00104275	9830, 10475, 6891, 3669, 6890, 27074, 4940	54	202	9145	5.86863	0.823783	0.0225837	1.73991
GOTERM_BP_FAT	GO:0042129~regulation of T cell proliferation	5	8.62069	0.00104467	3127, 5880, 6363, 916, 3123	54	78	9145	10.8559	0.824346	0.0223343	1.74308
GOTERM_BP_FAT	GO:0072643~interferon-gamma secretion	3	5.17241	0.00115598	11118, 11119, 914	54	9	9145	56.4506	0.854074	0.0243731	1.92711
GOTERM_BP_FAT	GO:0098543~detection of other organism	3	5.17241	0.00115598	3127, 3106, 3123	54	9	9145	56.4506	0.854074	0.0243731	1.92711
GOTERM_BP_FAT	GO:2000147~positive regulation of cell motility	8	13.7931	0.00124597	4283, 5880, 3627, 6363, 9806, 10507, 5420, 10396	54	287	9145	4.72061	0.874392	0.0259188	2.07567
GOTERM_BP_FAT	GO:0032649~regulation of interferon-gamma production	4	6.89655	0.0013437	3127, 914, 916, 3123	54	38	9145	17.8265	0.893266	0.0275802	2.23674
GOTERM_BP_FAT	GO:0040017~positive regulation of locomotion	8	13.7931	0.00134998	4283, 5880, 3627, 6363, 9806, 10507, 5420, 10396	54	291	9145	4.65572	0.894377	0.0273701	2.24709
GOTERM_BP_FAT	GO:0019058~viral life cycle	9	15.5172	0.00139495	9830, 10475, 6231, 6891, 7852, 3669, 6890, 27074, 4940	54	379	9145	4.02155	0.902004	0.0279297	2.32113
GOTERM_BP_FAT	GO:0051272~positive regulation of cellular component movement	8	13.7931	0.00143237	4283, 5880, 3627, 6363, 9806, 10507, 5420, 10396	54	294	9145	4.60821	0.907927	0.0283281	2.38268
GOTERM_BP_FAT	GO:0043903~regulation of symbiosis, encompassing mutualism through parasitism	7	12.069	0.00143809	9830, 10475, 6891, 3669, 6890, 27074, 4940	54	215	9145	5.51378	0.9088	0.0281058	2.39209
GOTERM_BP_FAT	GO:0002577~regulation of antigen processing and presentation	3	5.17241	0.00143961	6363, 6891, 6890	54	10	9145	50.8056	0.909031	0.0278088	2.39459
GOTERM_BP_FAT	GO:0002443~leukocyte mediated immunity	6	10.3448	0.00150059	3127, 5880, 11118, 3106, 3123, 3635	54	146	9145	6.95967	0.917821	0.0286384	2.49482
GOTERM_BP_FAT	GO:0009605~response to external stimulus	16	27.5862	0.00160904	3127, 64135, 5880, 3627, 10507, 916, 115362, 4283, 10475, 6363, 7852, 3106, 3669, 84166, 3123, 4940	54	1144	9145	2.36856	0.931409	0.0303304	2.67283
GOTERM_BP_FAT	GO:0098581~detection of external biotic stimulus	3	5.17241	0.001753	3127, 3106, 3123	54	11	9145	46.1869	0.946042	0.0326324	2.90867
GOTERM_BP_FAT	GO:0002683~negative regulation of immune system process	7	12.069	0.0018133	55824, 3127, 10475, 3106, 84166, 3123, 3635	54	225	9145	5.26872	0.951202	0.0333641	3.00729
GOTERM_BP_FAT	GO:0098542~defense response to other organism	7	12.069	0.00198263	64135, 4283, 10475, 3627, 3669, 84166, 4940	54	229	9145	5.17669	0.963204	0.036028	3.28374
GOTERM_BP_FAT	GO:0042098~T cell proliferation	5	8.62069	0.00200585	3127, 6363, 11119, 916, 3123	54	93	9145	9.10494	0.964602	0.0360495	3.32159
GOTERM_BP_FAT	GO:0031294~lymphocyte costimulation	4	6.89655	0.0020585	3127, 6363, 916, 3123	54	44	9145	15.3956	0.967577	0.0365844	3.40736
GOTERM_BP_FAT	GO:0031295~T cell costimulation	4	6.89655	0.0020585	3127, 6363, 916, 3123	54	44	9145	15.3956	0.967577	0.0365844	3.40736
GOTERM_BP_FAT	GO:0009595~detection of biotic stimulus	3	5.17241	0.00209581	3127, 3106, 3123	54	12	9145	42.338	0.969532	0.0368427	3.46809
GOTERM_BP_FAT	GO:0002696~positive regulation of leukocyte activation	6	10.3448	0.00263543	3127, 6363, 914, 916, 3123, 3635	54	166	9145	6.12115	0.987613	0.04564	4.34255
GOTERM_BP_FAT	GO:0098609~cell-cell adhesion	12	20.6897	0.00271657	55824, 3127, 5880, 6363, 11119, 914, 6231, 10507, 916, 5420, 3683, 3123	54	732	9145	2.77626	0.989182	0.0465304	4.4734
GOTERM_BP_FAT	GO:0002690~positive regulation of leukocyte chemotaxis	4	6.89655	0.00280586	4283, 5880, 3627, 6363	54	49	9145	13.8246	0.990679	0.0475362	4.61718
GOTERM_BP_FAT	GO:0032673~regulation of interleukin-4 production	3	5.17241	0.00286831	3127, 916, 3123	54	14	9145	36.2897	0.991602	0.0480812	4.71762
GOTERM_BP_FAT	GO:0048870~cell motility	13	22.4138	0.00288848	4283, 5880, 3627, 6363, 4312, 9806, 914, 10507, 7852, 5420, 3683, 3635, 10396	54	851	9145	2.58704	0.99188	0.0479295	4.75005
GOTERM_BP_FAT	GO:0051674~localization of cell	13	22.4138	0.00288848	4283, 5880, 3627, 6363, 4312, 9806, 914, 10507, 7852, 5420, 3683, 3635, 10396	54	851	9145	2.58704	0.99188	0.0479295	4.75005
KEGG_PATHWAY	hsa04640:Hematopoietic cell lineage	4	6.89655	0.00295798	3127, 914, 916, 3123	35	35	4044	13.2049	0.231758	0.051364	3.16458
GOTERM_CC_FAT	GO:0044421~extracellular region part	23	39.6552	0.00310108	3127, 5880, 3627, 4312, 9806, 6231, 10507, 3683, 145864, 362, 10396, 5696, 4283, 6363, 419, 7852, 3106, 5420, 11272, 10940, 3123, 4940, 5698	47	2384	8545	1.75403	0.422902	0.0487484	3.74309
GOTERM_CC_FAT	GO:0005576~extracellular region	24	41.3793	0.00326713	3127, 5880, 3627, 4312, 9806, 6231, 914, 10507, 3683, 145864, 362, 10396, 5696, 4283, 6363, 419, 7852, 3106, 5420, 11272, 10940, 3123, 4940, 5698	47	2556	8545	1.70712	0.439669	0.0471226	3.93984
KEGG_PATHWAY	hsa05164:Influenza A	6	10.3448	0.00329005	3127, 64135, 3627, 4261, 3123, 4940	35	123	4044	5.63624	0.2542	0.0477073	3.51411
KEGG_PATHWAY	hsa04514:Cell adhesion molecules (CAMs)	5	8.62069	0.00419513	3127, 914, 3106, 3683, 3123	35	80	4044	7.22143	0.312128	0.0520469	4.46096
Downregulated
Category	Term	Count	%	Pvalue	Genes	List Total	Pop Hits	Pop Total	Fold Enrichment	Bonferroni	Benjamini	FDR
-	-	-	-	-	-	-	-	-	-	-	-	-
Wh-TNBC compared to Wh-Normal
Upregulated
Category	Term	Count	%	Pvalue	Genes	List Total	Pop Hits	Pop Total	Fold Enrichment	Bonferroni	Benjamini	FDR
GOTERM_MF_FAT	GO:0003723~RNA binding	791	18.6074	2.87816e-36	80742, 23658, 10992, 26608, 6499, 79080, 84284, 84285, 55226, 63931, 6875, 7343, 7341, 8243, 55920, 140576, 51493, 84294, 84295, 51491, 84298, 8761, 22919, 7329, 6895, 8241, 55922, 6894, 7332, 2971, 7334, 2972, 85441, 8446, 328, 284695, 7317, 10075, 5339, 6897, 10073, 1832, 22913, 908, 2961, 22916, 51282, 64794, 988, 27161, 10952, 339230, 984, 55272, 708, 705, 10056, 10963, 55269, 10969, 8449, 51…	3557	1378	8462	1.36558	7.66454e-33	7.66454e-33	5.11384e-33
GOTERM_MF_FAT	GO:0044822~poly(A) RNA binding	628	14.773	1.53154e-31	8880, 7205, 80742, 8886, 27067, 23518, 10992, 10898, 51377, 8125, 26608, 55379, 1729, 11097, 2011, 79080, 6780, 84284, 55226, 63931, 1719, 51163, 7343, 7341, 2023, 7203, 5216, 55920, 8243, 84294, 140576, 51493, 84295, 51491, 84298, 55110, 7329, 22919, 8761, 51191, 8106, 821, 55922, 8241, 7332, 7334, 6749, 85441, 8446, 811, 10885, 328, 226, 10884, 284695, 7317, 51388, 10075, 5339, 88745, 1832, 229…	3557	1072	8462	1.39365	4.07848e-28	2.03924e-28	2.7212e-28
GOTERM_CC_FAT	GO:1990904~ribonucleoprotein complex	405	9.52717	3.67567e-20	23658, 8220, 51373, 55239, 10992, 740, 79080, 10713, 6780, 55226, 23644, 63931, 3297, 10625, 84991, 7341, 10728, 23636, 84294, 78988, 8761, 8106, 55110, 6895, 821, 10084, 2975, 79622, 8445, 811, 10885, 328, 10884, 284695, 51388, 51182, 1302, 88745, 22913, 10607, 203068, 122704, 988, 27161, 55132, 28977, 28973, 84967, 55272, 55131, 55127, 3396, 96764, 10969, 28985, 8449, 60488, 8458, 51264, 84950,…	3699	673	8545	1.39017	4.84086e-17	4.84086e-17	6.01112e-17
GOTERM_CC_FAT	GO:0030529~intracellular ribonucleoprotein complex	404	9.50365	5.27215e-20	23658, 8220, 51373, 55239, 10992, 740, 79080, 10713, 6780, 55226, 23644, 63931, 3297, 10625, 84991, 7341, 10728, 23636, 84294, 78988, 8761, 8106, 55110, 6895, 821, 10084, 2975, 79622, 8445, 811, 10885, 328, 10884, 284695, 51388, 51182, 1302, 88745, 22913, 10607, 203068, 122704, 988, 27161, 55132, 28977, 28973, 84967, 55272, 55131, 55127, 3396, 96764, 10969, 28985, 8449, 60488, 8458, 51264, 84950,…	3699	672	8545	1.3888	6.94342e-17	3.47171e-17	8.62197e-17
GOTERM_BP_FAT	GO:0007005~mitochondrion organization	325	7.64526	3.30872e-19	51373, 55744, 51081, 10899, 23277, 374291, 56910, 740, 2011, 85465, 2017, 54998, 3091, 63931, 207, 80222, 409, 11338, 1981, 9868, 92609, 11331, 23788, 211, 78988, 51499, 81858, 118424, 10730, 7332, 55669, 55737, 401505, 10884, 5245, 10075, 134266, 57602, 617, 51287, 55486, 122704, 84300, 51537, 11222, 10245, 55278, 10953, 92667, 28976, 27166, 28977, 8834, 28973, 30968, 125988, 10651, 137682, 5326…	3840	536	9145	1.44401	3.34313e-15	3.34313e-15	6.7628e-16
GOTERM_CC_FAT	GO:0005743~mitochondrial inner membrane	254	5.97506	8.88167e-18	51373, 55744, 51081, 374291, 118980, 94097, 740, 54998, 204, 1329, 63933, 1327, 63931, 1593, 10476, 10478, 203427, 92609, 11331, 23788, 23787, 119559, 55210, 27089, 513, 10730, 622, 6472, 518, 516, 515, 514, 1468, 55735, 9997, 10884, 5245, 94081, 522, 521, 134266, 56901, 617, 55486, 23380, 122704, 84300, 51537, 11222, 10245, 28976, 28977, 8834, 28973, 57380, 6390, 125988, 6391, 30968, 137682, 104…	3699	395	8545	1.48547	1.16972e-14	3.89905e-15	1.45249e-14
GOTERM_CC_FAT	GO:0019866~organelle inner membrane	271	6.37497	1.85932e-16	51373, 55744, 51081, 10204, 374291, 118980, 94097, 740, 2010, 54998, 204, 221496, 1329, 63933, 1327, 63931, 1593, 10476, 10478, 203427, 92609, 11331, 23788, 23787, 11335, 119559, 55210, 27089, 513, 10730, 622, 6472, 518, 516, 515, 514, 1468, 55735, 9997, 10884, 5245, 94081, 522, 521, 134266, 56901, 3930, 617, 55486, 23380, 122704, 84300, 51537, 11222, 10245, 28976, 28977, 8834, 28973, 57380, 6390…	3699	432	8545	1.44915	2.92433e-13	7.30527e-14	3.66374e-13
GOTERM_BP_FAT	GO:0034660~ncRNA metabolic process	286	6.72783	2.49843e-16	1478, 6621, 6204, 10200, 10898, 6619, 56915, 79080, 3921, 2958, 55644, 6618, 55759, 55226, 6217, 6882, 80222, 51096, 6223, 6878, 55651, 83707, 55656, 54881, 51493, 84294, 55726, 51593, 11340, 112495, 1453, 16, 54888, 55720, 6895, 115939, 6894, 2975, 9191, 2976, 2971, 23016, 2972, 4234, 55661, 83732, 10885, 3735, 90121, 65123, 81875, 88745, 6897, 6201, 25917, 2963, 10607, 54487, 2961, 22916, 2960,…	3840	474	9145	1.43695	2.24354e-12	1.12177e-12	4.55191e-13
GOTERM_BP_FAT	GO:0006259~DNA metabolic process	388	9.12726	4.7738e-16	79703, 8882, 23514, 54107, 63922, 5371, 54108, 51377, 7353, 29128, 2956, 10714, 23649, 55226, 207, 3297, 409, 7341, 84893, 7203, 8208, 10728, 5216, 8243, 55215, 84296, 348654, 7329, 7334, 7335, 7336, 6749, 811, 328, 5245, 7319, 10075, 55388, 908, 222229, 2968, 988, 6598, 6596, 10856, 983, 55270, 7398, 78996, 63979, 5928, 581, 836, 56897, 9212, 7247, 29803, 8451, 55120, 57461, 9319, 3265, 10973, 5…	3840	682	9145	1.35488	4.48708e-12	1.49569e-12	9.10383e-13
GOTERM_CC_FAT	GO:0000313~organellar ribosome	69	1.62315	7.17215e-16	122704, 26164, 11222, 51373, 51081, 28977, 9553, 90480, 28973, 740, 54148, 64983, 128308, 118487, 64981, 55052, 6150, 3396, 63931, 60488, 64975, 54460, 51264, 64928, 64976, 64979, 65005, 64978, 57129, 10573, 65003, 29074, 79590, 9801, 6182, 51650, 78988, 387338, 6183, 51021, 56945, 51069, 54534, 4701, 28957, 64969, 28998, 55168, 64968, 64965, 64963, 51253, 64960, 51258, 29088, 63875, 51116, 64949…	3699	78	8545	2.04354	8.77298e-13	1.75415e-13	1.08802e-12
GOTERM_CC_FAT	GO:0005761~mitochondrial ribosome	69	1.62315	7.17215e-16	122704, 26164, 11222, 51373, 51081, 28977, 9553, 90480, 28973, 740, 54148, 64983, 128308, 118487, 64981, 55052, 6150, 3396, 63931, 60488, 64975, 54460, 51264, 64928, 64976, 64979, 65005, 64978, 57129, 10573, 65003, 29074, 79590, 9801, 6182, 51650, 78988, 387338, 6183, 51021, 56945, 51069, 54534, 4701, 28957, 64969, 28998, 55168, 64968, 64965, 64963, 51253, 64960, 51258, 29088, 63875, 51116, 64949…	3699	78	8545	2.04354	8.77298e-13	1.75415e-13	1.08802e-12
GOTERM_BP_FAT	GO:0070125~mitochondrial translational elongation	72	1.69372	2.76021e-15	122704, 11222, 51373, 51081, 28977, 9553, 90480, 28973, 740, 54148, 64983, 128308, 118487, 64981, 54998, 55052, 6150, 7284, 3396, 63931, 60488, 64975, 54460, 51264, 64928, 64976, 10102, 64979, 65005, 64978, 57129, 10573, 65003, 29074, 79590, 65008, 55037, 9801, 6182, 51650, 6183, 65080, 56945, 51021, 51069, 54534, 28957, 64969, 28998, 55168, 64968, 64965, 64963, 51253, 64960, 51258, 29088, 63875,…	3840	85	9145	2.01728	2.80442e-11	7.01106e-12	5.67324e-12
GOTERM_BP_FAT	GO:0032543~mitochondrial translation	90	2.11715	2.91486e-15	84300, 122704, 11222, 51001, 55278, 51373, 51081, 28977, 9553, 28973, 90480, 57038, 740, 54148, 64983, 708, 128308, 118487, 64981, 54998, 55052, 6150, 7284, 3396, 63931, 80222, 60488, 64975, 54460, 51264, 64928, 64976, 10102, 64979, 65005, 64978, 57129, 10573, 65003, 29074, 79590, 65008, 55037, 9801, 55157, 6182, 51650, 78988, 6183, 387338, 65080, 56945, 51021, 51069, 54534, 4701, 51067, 28957, 5…	3840	114	9145	1.88014	2.9166e-11	5.83322e-12	5.89528e-12
GOTERM_BP_FAT	GO:0006396~RNA processing	421	9.90355	4.09804e-15	8882, 23658, 8220, 10992, 10898, 79084, 79080, 10713, 55226, 8732, 3297, 51163, 10625, 84991, 51493, 84294, 8761, 8106, 55110, 6895, 8241, 6894, 10084, 79622, 8446, 10885, 90121, 284695, 88745, 10073, 22913, 2963, 10607, 22916, 2968, 988, 27161, 25896, 84967, 55272, 55131, 10656, 708, 10657, 705, 27037, 55127, 96764, 55269, 10969, 8449, 8458, 25888, 84950, 162989, 8634, 57461, 27043, 27042, 38733…	3840	757	9145	1.32446	4.15055e-11	6.91758e-12	8.39329e-12
GOTERM_CC_FAT	GO:0005654~nucleoplasm	1191	28.0169	7.65457e-15	23658, 63922, 54107, 332, 6873, 6874, 3281, 29028, 330, 63925, 5371, 10992, 7353, 79084, 6499, 2956, 6498, 10714, 10713, 2958, 23649, 84285, 55226, 8732, 6882, 6883, 23644, 6885, 3297, 6881, 50626, 7345, 79096, 8726, 7343, 8725, 6875, 1810, 6878, 7341, 149603, 8208, 10728, 10726, 8243, 55215, 8242, 51493, 84295, 84296, 1434, 51497, 84299, 7329, 57228, 8038, 25776, 57223, 55922, 8241, 10084, 10730…	3699	2383	8545	1.15456	1.00889e-11	1.68154e-12	1.25233e-11
GOTERM_BP_FAT	GO:0070126~mitochondrial translational termination	70	1.64667	1.13174e-14	122704, 11222, 51373, 51081, 28977, 9553, 90480, 28973, 740, 54148, 64983, 128308, 118487, 64981, 54998, 55052, 6150, 3396, 63931, 60488, 64975, 54460, 51264, 64928, 64976, 64979, 65005, 64978, 57129, 10573, 65003, 29074, 79590, 65008, 55037, 9801, 6182, 51650, 6183, 65080, 51021, 56945, 51069, 54534, 28957, 64969, 28998, 55168, 64968, 64965, 64963, 51253, 64960, 51258, 29088, 63875, 10884, 65993…	3840	83	9145	2.0085	1.1442e-10	1.63458e-11	2.31482e-11
GOTERM_BP_FAT	GO:0006415~translational termination	75	1.76429	1.25246e-14	122704, 11222, 51373, 51081, 28977, 9553, 90480, 143244, 28973, 740, 54148, 64983, 128308, 118487, 64981, 54998, 55052, 6150, 3396, 63931, 60488, 64975, 54460, 6059, 51264, 64928, 64976, 64979, 65005, 64978, 57129, 1984, 10573, 65003, 29074, 79590, 65008, 55037, 9801, 6182, 51650, 6183, 65080, 56945, 51021, 2935, 51069, 54534, 28957, 64969, 28998, 55168, 64968, 64965, 64963, 51253, 64960, 29088, …	3840	91	9145	1.96278	1.2676e-10	1.5845e-11	2.56462e-11
GOTERM_CC_FAT	GO:0098800~inner mitochondrial membrane protein complex	85	1.99953	2.8835e-14	1351, 29796, 4697, 10245, 9556, 9551, 26519, 374291, 6390, 125988, 6391, 10440, 1329, 509, 1327, 80273, 10105, 7381, 54927, 10476, 4695, 92609, 4696, 1337, 7388, 4694, 7386, 7384, 54539, 4709, 4707, 4708, 4706, 4704, 10939, 440574, 4701, 4702, 4700, 4731, 27089, 513, 10632, 126328, 518, 93974, 516, 515, 514, 9377, 4728, 4716, 4717, 4718, 4729, 4712, 4723, 4713, 55572, 4726, 4714, 790955, 51079, 4…	3699	106	8545	1.85243	3.80163e-11	5.43088e-12	4.72067e-11
GOTERM_CC_FAT	GO:0005694~chromosome	379	8.91555	2.37877e-13	79703, 4796, 55746, 6772, 8886, 23514, 63922, 54107, 332, 6874, 2332, 54108, 5371, 10609, 51377, 23279, 79902, 10615, 29128, 6612, 2956, 56915, 10714, 65057, 23649, 55226, 79711, 3297, 10473, 9869, 4605, 114799, 8726, 7175, 7341, 4221, 55651, 6603, 84893, 8208, 23126, 10728, 11335, 1457, 8243, 55920, 10320, 55723, 84295, 84296, 7227, 84298, 9984, 23397, 7329, 55869, 348235, 387893, 25909, 5347, 6…	3699	666	8545	1.3146	3.13342e-10	3.91677e-11	3.89089e-10
GOTERM_BP_FAT	GO:0006281~DNA repair	227	5.33992	2.67615e-13	4796, 23514, 5371, 51377, 7353, 6612, 29128, 2956, 10714, 6613, 51567, 56647, 7341, 4221, 84893, 8208, 8243, 55215, 84296, 1453, 348654, 7329, 7334, 1069, 7335, 7336, 6749, 9978, 55666, 328, 10213, 65123, 51588, 3835, 2305, 7319, 10075, 286257, 79447, 2968, 83932, 4350, 988, 6598, 10856, 6596, 286053, 92667, 983, 86, 10445, 7398, 78996, 63979, 4841, 84444, 7979, 56897, 55611, 8451, 23028, 55120, …	3840	375	9145	1.44161	2.70346e-09	3.00385e-10	5.46885e-10
KEGG_PATHWAY	hsa03050:Proteasome	41	0.964479	3.42073e-13	5717, 5718, 5719, 5682, 5710, 51371, 9861, 5686, 5713, 5685, 5714, 5684, 5683, 9491, 23198, 10197, 5699, 5698, 5708, 5709, 5706, 5707, 5691, 5704, 5690, 5705, 10213, 5693, 5702, 5720, 5692, 5721, 5695, 7979, 5700, 5694, 5701, 5696, 5687, 5688, 5689	1836	41	4044	2.20261	9.91973e-11	9.91973e-11	4.54736e-10
GOTERM_BP_FAT	GO:0006414~translational elongation	94	2.21124	6.67395e-13	1936, 122704, 60678, 6726, 11222, 57176, 51373, 51081, 9553, 28977, 54952, 28973, 143244, 90480, 55272, 740, 54148, 64983, 128308, 118487, 64981, 54998, 55052, 6150, 7284, 7407, 3396, 63931, 60488, 64975, 54460, 51264, 64928, 10767, 64976, 10102, 79693, 64979, 65005, 64978, 57129, 10573, 1984, 65003, 29074, 79590, 65008, 55037, 9801, 6182, 51650, 6183, 65080, 51714, 56945, 51021, 51069, 54534, 16…	3840	127	9145	1.76269	6.74296e-09	6.74296e-10	1.36403e-09
GOTERM_BP_FAT	GO:0031145~anaphase-promoting complex-dependent catabolic process	62	1.45848	8.60553e-13	5682, 9861, 5686, 5685, 5684, 5683, 983, 9491, 27338, 10197, 701, 51529, 5708, 5709, 5706, 5707, 5691, 5704, 5690, 5705, 5693, 5702, 5692, 5700, 7314, 5695, 5701, 5694, 7311, 5696, 5687, 5688, 5689, 9212, 51434, 51433, 4085, 5717, 5718, 5719, 5710, 5713, 5714, 5715, 6790, 5716, 25906, 23198, 51343, 5347, 5699, 5698, 11065, 10213, 5720, 5721, 9232, 7321, 7324, 9184, 991, 891	3840	74	9145	1.99532	8.69483e-09	7.90439e-10	1.75887e-09
GOTERM_BP_FAT	GO:1904667~negative regulation of ubiquitin protein ligase activity	58	1.36438	1.20939e-12	5682, 9861, 5686, 5685, 5684, 5683, 983, 9491, 10197, 701, 51529, 5708, 5709, 5706, 5707, 5704, 5691, 5705, 5690, 5702, 5693, 5692, 5700, 7314, 5695, 5701, 5694, 7311, 5696, 5687, 5688, 5689, 51434, 51433, 4085, 5717, 5718, 5719, 5710, 5713, 5714, 5715, 5716, 25906, 51343, 5699, 5698, 11065, 1017, 10213, 5720, 5721, 7321, 7324, 10459, 9184, 991, 891	3840	68	9145	2.03129	1.22194e-08	1.01829e-09	2.47187e-09
GOTERM_BP_FAT	GO:0051439~regulation of ubiquitin-protein ligase activity involved in mitotic cell cycle	58	1.36438	1.20939e-12	5682, 9861, 5686, 5685, 5684, 5683, 983, 9491, 10197, 701, 51529, 5708, 5709, 5706, 5707, 5704, 5691, 5705, 5690, 5702, 5693, 5692, 5700, 7314, 5695, 5701, 5694, 7311, 5696, 5687, 5688, 5689, 51434, 51433, 4085, 5717, 5718, 5719, 5710, 5713, 5714, 5715, 5716, 25906, 51343, 5347, 5699, 5698, 11065, 1017, 10213, 5720, 5721, 7321, 7324, 9184, 991, 891	3840	68	9145	2.03129	1.22194e-08	1.01829e-09	2.47187e-09
GOTERM_CC_FAT	GO:0098798~mitochondrial protein complex	102	2.39944	1.45485e-12	29796, 4697, 5163, 9556, 10295, 9551, 374291, 87178, 56993, 84134, 1329, 1327, 54927, 9868, 10476, 4695, 4696, 92609, 4694, 54539, 9804, 10939, 440574, 27089, 513, 518, 516, 93974, 515, 514, 5428, 401505, 9377, 440567, 522, 29090, 521, 134266, 79135, 56901, 55013, 617, 26517, 55139, 1351, 10245, 26519, 6390, 6391, 125988, 10440, 509, 26521, 581, 80273, 6832, 10105, 7381, 1337, 7388, 7386, 7384, 4…	3699	139	8545	1.69517	1.91602e-09	2.12891e-10	2.37921e-09
GOTERM_BP_FAT	GO:0043487~regulation of RNA stability	95	2.23477	1.74565e-12	1869, 8570, 5682, 2332, 9861, 5686, 5685, 8125, 5684, 54512, 5683, 55544, 9491, 4615, 10197, 6418, 23404, 56915, 3192, 3304, 51010, 5708, 55795, 5709, 5706, 3303, 51013, 10236, 5707, 5691, 5704, 5690, 5705, 1797, 5693, 5702, 5692, 5695, 55095, 7314, 1660, 5700, 5694, 207, 5701, 5073, 7311, 5696, 5687, 5688, 5689, 1981, 57060, 3183, 3184, 5976, 26986, 5717, 5718, 11340, 5719, 7514, 9261, 5710, 988…	3840	130	9145	1.74033	1.76376e-08	1.35674e-09	3.5679e-09
GOTERM_BP_FAT	GO:0051436~negative regulation of ubiquitin-protein ligase activity involved in mitotic cell cycle	57	1.34086	2.43917e-12	5682, 9861, 5686, 5685, 5684, 5683, 983, 9491, 10197, 701, 51529, 5708, 5709, 5706, 5707, 5704, 5691, 5705, 5690, 5702, 5693, 5692, 5700, 7314, 5695, 5701, 5694, 7311, 5696, 5687, 5688, 5689, 51434, 51433, 4085, 5717, 5718, 5719, 5710, 5713, 5714, 5715, 5716, 25906, 51343, 5699, 5698, 11065, 1017, 10213, 5720, 5721, 7321, 7324, 9184, 991, 891	3840	67	9145	2.02606	2.46453e-08	1.76038e-09	4.98549e-09
GOTERM_MF_FAT	GO:0003676~nucleic acid binding	1228	28.8873	2.44635e-12	80742, 23658, 63922, 54107, 6873, 6874, 63925, 54108, 5371, 10992, 26608, 79084, 6499, 2956, 6498, 79080, 85460, 84284, 23649, 84285, 55226, 6882, 6883, 63931, 3298, 3297, 5359, 7343, 6875, 1810, 6878, 7341, 84893, 55920, 8243, 55215, 84294, 8242, 140576, 51493, 84295, 51491, 84298, 7329, 8761, 22919, 6895, 55922, 8241, 6894, 10084, 2975, 10732, 7332, 2976, 2971, 7334, 2972, 85441, 8446, 8427, 32…	3557	2574	8462	1.13496	6.5147e-09	2.17157e-09	4.34666e-09
GOTERM_BP_FAT	GO:0002478~antigen processing and presentation of exogenous peptide antigen	97	2.28182	2.50526e-12	22872, 29127, 5682, 9861, 5686, 24137, 5685, 5684, 5683, 9491, 10197, 1520, 9493, 3107, 2207, 6396, 3106, 3109, 3105, 5708, 3136, 5709, 4688, 5706, 5707, 5691, 5704, 5705, 5690, 9871, 5702, 5693, 5692, 5700, 5695, 972, 5701, 5694, 7879, 5696, 1514, 5687, 162, 5688, 10437, 5689, 11004, 375, 160, 64837, 10053, 1515, 5717, 3127, 5718, 5719, 6891, 5710, 1785, 6890, 5713, 821, 5714, 5715, 8655, 5716, …	3840	134	9145	1.72393	2.53127e-08	1.68752e-09	5.1205e-09
GOTERM_CC_FAT	GO:0031975~envelope	483	11.362	2.92526e-12	23511, 51373, 5371, 51374, 374291, 55379, 118980, 94097, 11097, 740, 2010, 204, 1329, 63933, 1327, 63931, 79711, 1717, 7341, 23788, 23787, 119559, 23636, 51493, 23534, 1434, 55210, 7329, 51499, 55219, 27089, 513, 10730, 1841, 622, 6472, 518, 516, 515, 514, 401505, 10885, 10884, 5245, 128866, 94081, 522, 521, 10073, 203068, 51287, 617, 2000, 55486, 55139, 122704, 10953, 192111, 28976, 27166, 28977…	3699	889	8545	1.25508	3.85251e-09	3.85251e-10	4.78384e-09
GOTERM_BP_FAT	GO:0019884~antigen processing and presentation of exogenous antigen	98	2.30534	2.97061e-12	22872, 29127, 5682, 9861, 5686, 24137, 5685, 5684, 5683, 9491, 10197, 1520, 9493, 3107, 2207, 6396, 3106, 3109, 3105, 5708, 3136, 5709, 4688, 5706, 5707, 5691, 5704, 5705, 5690, 9871, 5702, 5693, 5692, 5700, 5695, 972, 5701, 5694, 7879, 5696, 1514, 5687, 162, 5688, 10437, 5689, 11004, 375, 160, 64837, 10053, 1515, 5717, 3127, 5718, 5719, 6891, 5710, 1785, 8943, 6890, 5713, 821, 5714, 5715, 8655, …	3840	136	9145	1.71609	3.00152e-08	1.87595e-09	6.07177e-09
GOTERM_CC_FAT	GO:0031967~organelle envelope	482	11.3385	2.99491e-12	23511, 51373, 5371, 51374, 374291, 55379, 118980, 94097, 11097, 740, 2010, 204, 1329, 63933, 1327, 63931, 79711, 1717, 7341, 23788, 23787, 119559, 23636, 51493, 23534, 1434, 55210, 7329, 51499, 55219, 27089, 513, 10730, 1841, 622, 6472, 518, 516, 515, 514, 401505, 10885, 10884, 5245, 128866, 94081, 522, 521, 10073, 203068, 51287, 617, 2000, 55486, 55139, 122704, 10953, 192111, 28976, 27166, 28977…	3699	887	8545	1.25531	3.94433e-09	3.58576e-10	4.89786e-09
GOTERM_BP_FAT	GO:0006521~regulation of cellular amino acid metabolic process	45	1.05857	3.12447e-12	5717, 5718, 5719, 5682, 5710, 9861, 5686, 5713, 5685, 5714, 5684, 5715, 5683, 5716, 9491, 23198, 10197, 4946, 5699, 5698, 51582, 5708, 5709, 5706, 5707, 5691, 5704, 5690, 5705, 10213, 5693, 5702, 5720, 5692, 5721, 5695, 5700, 5694, 5701, 5696, 5687, 5688, 5689, 9056, 4953	3840	49	9145	2.1871	3.157e-08	1.85706e-09	6.38628e-09
GOTERM_BP_FAT	GO:0042590~antigen processing and presentation of exogenous peptide antigen via MHC class I	51	1.19972	3.3953e-12	5682, 9861, 5686, 5685, 5684, 5683, 9491, 10197, 2207, 3107, 3106, 3105, 5708, 3136, 5709, 4688, 5706, 5707, 5704, 5691, 5705, 5690, 5702, 5693, 5692, 5700, 5695, 5701, 5694, 5696, 5687, 10437, 5688, 5689, 5717, 5718, 5719, 5710, 5713, 5714, 5715, 5716, 23198, 3134, 5699, 5698, 10213, 5720, 5721, 567, 1535	3840	58	9145	2.09409	3.43059e-08	1.90589e-09	6.93974e-09
GOTERM_BP_FAT	GO:0002479~antigen processing and presentation of exogenous peptide antigen via MHC class I, TAP-dependent	49	1.15267	3.50621e-12	5682, 9861, 5686, 5685, 5684, 5683, 9491, 10197, 3107, 3106, 3105, 5708, 3136, 5709, 4688, 5706, 5707, 5704, 5691, 5705, 5690, 5702, 5693, 5692, 5700, 5695, 5701, 5694, 5696, 5687, 5688, 5689, 5717, 5718, 5719, 5710, 5713, 5714, 5715, 5716, 23198, 3134, 5699, 5698, 10213, 5720, 5721, 567, 1535	3840	55	9145	2.12171	3.54266e-08	1.86456e-09	7.16643e-09
GOTERM_BP_FAT	GO:0043488~regulation of mRNA stability	91	2.14067	3.66226e-12	1869, 8570, 5682, 2332, 9861, 5686, 5685, 8125, 5684, 54512, 5683, 55544, 9491, 4615, 10197, 6418, 23404, 56915, 3192, 3304, 51010, 5708, 55795, 5709, 5706, 3303, 51013, 10236, 5707, 5691, 5704, 5690, 5705, 5693, 5702, 5692, 5695, 55095, 7314, 1660, 5700, 5694, 207, 5701, 5073, 7311, 5696, 5687, 5688, 5689, 1981, 57060, 3183, 3184, 5976, 26986, 5717, 5718, 11340, 5719, 7514, 9261, 5710, 3312, 118…	3840	124	9145	1.74772	3.70038e-08	1.85019e-09	7.48549e-09
GOTERM_BP_FAT	GO:1904666~regulation of ubiquitin protein ligase activity	63	1.482	4.21255e-12	84930, 5682, 9861, 5686, 5685, 5684, 5683, 983, 9491, 27338, 10197, 701, 51529, 5708, 5709, 5706, 5707, 5691, 5704, 5690, 5705, 5693, 5702, 5692, 5700, 7314, 5695, 5701, 5694, 7311, 5696, 5687, 5688, 5689, 8454, 51434, 51433, 4085, 5717, 5718, 5719, 5710, 5713, 5714, 5715, 5716, 25906, 23198, 51343, 5347, 5699, 5698, 11065, 1017, 10213, 5720, 5721, 7321, 7324, 10459, 9184, 991, 891	3840	77	9145	1.94851	4.25633e-08	2.02682e-09	8.61011e-09
GOTERM_CC_FAT	GO:0005740~mitochondrial envelope	329	7.73936	4.6205e-12	51373, 55744, 55847, 51081, 374291, 118980, 7064, 94097, 740, 54998, 3098, 204, 1329, 63933, 1327, 63931, 55750, 1593, 9868, 10476, 10478, 203427, 92609, 11331, 23788, 23787, 119559, 55210, 51499, 27089, 513, 10730, 1841, 56616, 55669, 622, 6472, 518, 516, 388753, 515, 514, 401505, 1468, 55735, 64083, 9997, 10884, 5245, 94081, 522, 521, 134266, 56901, 65260, 617, 51287, 55486, 23380, 55139, 84300…	3699	575	8545	1.32177	6.08523e-09	5.07103e-10	7.55632e-09
GOTERM_BP_FAT	GO:0051437~positive regulation of ubiquitin-protein ligase activity involved in regulation of mitotic cell cycle transition	59	1.38791	6.66504e-12	5682, 9861, 5686, 5685, 5684, 5683, 983, 9491, 10197, 701, 51529, 5708, 5709, 5706, 5707, 5704, 5691, 5705, 5690, 5702, 5693, 5692, 5700, 7314, 5695, 5701, 5694, 7311, 5696, 5687, 5688, 5689, 8454, 51434, 51433, 4085, 5717, 5718, 5719, 5710, 5713, 5714, 5715, 5716, 25906, 23198, 51343, 5347, 5699, 5698, 11065, 10213, 5720, 5721, 7321, 7324, 9184, 991, 891	3840	71	9145	1.979	6.73432e-08	3.06105e-09	1.36228e-08
GOTERM_BP_FAT	GO:0000278~mitotic cell cycle	413	9.71536	6.96833e-12	51379, 8882, 8883, 805, 23511, 29127, 23513, 332, 6873, 330, 5371, 10899, 10617, 6491, 6868, 10615, 11097, 8877, 2010, 23649, 207, 1719, 10726, 23636, 55920, 8243, 55215, 126731, 348654, 7329, 22919, 51499, 387893, 5347, 79621, 85444, 8428, 328, 128866, 7321, 55388, 7324, 203068, 808, 64793, 136647, 988, 10950, 6597, 8636, 984, 983, 9491, 55270, 84967, 9493, 701, 10657, 5116, 5119, 581, 3398, 744…	3840	768	9145	1.28068	7.04079e-08	3.06121e-09	1.42428e-08
GOTERM_BP_FAT	GO:0006403~RNA localization	122	2.86991	8.33452e-12	2091, 55746, 23511, 2332, 23279, 10204, 10694, 79902, 4927, 51634, 143244, 10921, 51637, 87178, 220988, 1977, 11097, 3921, 51010, 4686, 100101267, 4116, 8683, 7884, 11338, 7175, 1984, 4600, 55651, 7203, 23636, 65083, 9804, 79023, 54680, 26993, 9984, 7514, 8106, 55110, 6950, 9887, 51692, 9883, 84324, 25909, 9775, 81608, 84321, 9631, 7528, 8563, 10212, 10211, 51602, 10073, 10128, 399664, 908, 22916…	3840	181	9145	1.60522	8.42123e-08	3.50885e-09	1.70353e-08
GOTERM_BP_FAT	GO:0048002~antigen processing and presentation of peptide antigen	102	2.39944	1.07546e-11	22872, 29127, 9861, 1520, 2207, 10134, 4688, 3136, 9871, 7879, 1514, 162, 11004, 160, 1515, 3127, 6891, 6892, 6890, 1785, 821, 8655, 23198, 9632, 3797, 1509, 3134, 22920, 84516, 5699, 5698, 811, 3115, 3117, 3118, 3119, 3832, 10213, 3835, 1062, 10121, 3123, 3122, 5682, 24137, 5686, 5685, 5684, 5683, 9491, 9493, 10197, 3107, 6396, 3106, 3109, 3105, 5708, 5709, 5706, 5707, 5704, 5691, 5705, 5690, 57…	3840	145	9145	1.67527	1.08665e-07	4.34659e-09	2.19817e-08
GOTERM_BP_FAT	GO:0002474~antigen processing and presentation of peptide antigen via MHC class I	63	1.482	1.21443e-11	22872, 5682, 9861, 5686, 5685, 5684, 5683, 9491, 10197, 3107, 2207, 6396, 3106, 3105, 10134, 5708, 5709, 3136, 4688, 5706, 5707, 5691, 5704, 5705, 5690, 5702, 9871, 5693, 5692, 5700, 5695, 5701, 5694, 5696, 5687, 5688, 10437, 5689, 5717, 5718, 5719, 6891, 6892, 5710, 6890, 5713, 5714, 821, 5715, 5716, 23198, 9632, 3134, 5699, 5698, 811, 2923, 3119, 10213, 5720, 5721, 567, 1535	3840	78	9145	1.92353	1.22706e-07	4.71946e-09	2.48221e-08
GOTERM_BP_FAT	GO:0051444~negative regulation of ubiquitin-protein transferase activity	61	1.43496	1.57883e-11	5682, 9861, 5686, 5685, 5684, 5683, 983, 9491, 10197, 701, 51529, 5708, 5709, 5706, 5707, 5691, 5704, 5705, 5690, 5702, 5693, 5692, 5700, 7314, 5695, 5701, 5694, 7311, 5696, 5687, 5688, 5689, 51434, 51433, 4085, 5717, 5718, 5719, 5710, 1029, 5713, 5714, 5715, 5716, 3984, 25906, 51343, 5699, 5698, 11065, 1017, 10213, 5720, 5721, 11315, 7321, 7324, 10459, 9184, 991, 891	3840	75	9145	1.93696	1.59525e-07	5.90832e-09	3.22702e-08
GOTERM_BP_FAT	GO:1904668~positive regulation of ubiquitin protein ligase activity	61	1.43496	1.57883e-11	84930, 5682, 9861, 5686, 5685, 5684, 5683, 983, 9491, 27338, 10197, 701, 51529, 5708, 5709, 5706, 5707, 5691, 5704, 5705, 5690, 5702, 5693, 5692, 5700, 7314, 5695, 5701, 5694, 7311, 5696, 5687, 5688, 5689, 8454, 51434, 51433, 4085, 5717, 5718, 5719, 5710, 5713, 5714, 5715, 5716, 25906, 23198, 51343, 5347, 5699, 5698, 11065, 10213, 5720, 5721, 7321, 7324, 9184, 991, 891	3840	75	9145	1.93696	1.59525e-07	5.90832e-09	3.22702e-08
GOTERM_BP_FAT	GO:0006399~tRNA metabolic process	100	2.35239	1.58447e-11	79587, 2091, 51002, 54517, 1478, 57176, 64118, 10898, 54913, 51637, 57038, 11157, 55644, 51010, 55226, 7407, 80222, 79897, 79691, 79693, 55039, 83707, 51493, 112495, 11340, 116461, 16, 339175, 54888, 3028, 6894, 2975, 54931, 2976, 54938, 2972, 23016, 84705, 26995, 4234, 81605, 10940, 8565, 3735, 6897, 51605, 283989, 25917, 51504, 124454, 54802, 5917, 10248, 55687, 113802, 55278, 79042, 7453, 2193…	3840	142	9145	1.67712	1.60094e-07	5.71766e-09	3.23854e-08
KEGG_PATHWAY	hsa00190:Oxidative phosphorylation	82	1.92896	1.78235e-11	1352, 1351, 29796, 9550, 4697, 9551, 374291, 533, 6390, 6391, 1349, 537, 1347, 1345, 10063, 1340, 1329, 509, 1327, 9296, 7381, 9114, 10476, 4695, 4696, 1337, 7388, 4694, 7386, 7384, 54539, 4709, 4707, 4708, 4706, 155066, 4704, 4701, 4702, 10975, 4700, 4731, 27089, 513, 5464, 10632, 64077, 9167, 8992, 126328, 518, 516, 515, 514, 9377, 4728, 4716, 4717, 10312, 4718, 4729, 4712, 4723, 4713, 4726, 47…	1836	105	4044	1.72014	5.16882e-09	2.58441e-09	2.36944e-08
GOTERM_BP_FAT	GO:1903047~mitotic cell cycle process	385	9.05669	1.98248e-11	51379, 8882, 8883, 805, 55746, 23511, 29127, 332, 6873, 330, 5371, 55743, 9861, 23279, 10899, 79902, 10617, 55544, 6491, 6868, 10615, 3925, 7164, 1977, 11097, 1978, 2010, 4218, 54998, 23649, 54892, 100101267, 207, 4605, 1719, 1981, 10474, 80218, 7175, 84687, 11331, 23126, 10726, 1457, 55215, 23636, 8243, 55920, 126731, 55726, 1453, 23399, 23397, 128239, 348654, 7329, 22919, 51499, 54888, 9883, 34…	3840	713	9145	1.28595	2.0031e-07	6.90724e-09	4.05206e-08
GOTERM_BP_FAT	GO:0006119~oxidative phosphorylation	68	1.59962	2.52468e-11	1352, 1351, 29796, 4697, 374291, 90480, 6391, 1349, 1345, 1340, 509, 1329, 1327, 10105, 7381, 4695, 4696, 1337, 4694, 7388, 7386, 7384, 54539, 4709, 4707, 4708, 4706, 7415, 4704, 4701, 4702, 10975, 4700, 4731, 27089, 513, 6901, 9167, 126328, 57017, 388753, 9377, 2631, 4728, 4716, 4717, 4718, 4729, 4712, 4436, 4723, 4713, 4726, 790955, 4714, 51079, 4725, 4715, 4720, 440567, 4722, 4710, 4711, 11315…	3840	87	9145	1.86141	2.55094e-07	8.50312e-09	5.16028e-08
GOTERM_BP_FAT	GO:0051276~chromosome organization	440	10.3505	2.61726e-11	29127, 54107, 332, 29028, 63925, 54108, 5371, 10609, 8125, 10615, 29128, 2956, 10714, 11091, 23649, 55226, 79718, 6883, 6885, 79711, 6881, 8726, 10626, 1810, 84893, 7203, 8208, 10728, 10726, 55920, 8243, 8242, 84296, 348654, 22919, 387893, 7334, 5347, 23523, 328, 55201, 5245, 128866, 27097, 7319, 10075, 84875, 908, 7324, 222229, 85236, 2968, 85453, 6599, 26039, 6598, 6597, 6596, 10856, 983, 9493,…	3840	831	9145	1.26097	2.64448e-07	8.53059e-09	5.34951e-08
GOTERM_BP_FAT	GO:0034470~ncRNA processing	207	4.86944	3.36553e-11	1478, 6204, 10200, 10898, 56915, 3921, 79080, 55644, 55759, 55226, 6217, 51096, 6223, 55651, 83707, 55656, 54881, 51493, 84294, 11340, 51593, 1453, 54888, 16, 6895, 55720, 115939, 6894, 23016, 4234, 55661, 83732, 10885, 3735, 90121, 65123, 81875, 88745, 6201, 25917, 54487, 10607, 56902, 9188, 11224, 27161, 10248, 113802, 92856, 25896, 55505, 55272, 81887, 113000, 705, 55798, 55127, 23160, 10969, …	3840	348	9145	1.41659	3.40053e-07	1.06267e-08	6.87893e-08
GOTERM_BP_FAT	GO:0009123~nucleoside monophosphate metabolic process	147	3.45801	3.90373e-11	22978, 29796, 5230, 4697, 7298, 159, 158, 5634, 9551, 374291, 7167, 481, 3098, 204, 5223, 1329, 3091, 1327, 3692, 271, 10476, 471, 1716, 4695, 4696, 2023, 4694, 5214, 29789, 10165, 54539, 7415, 3312, 27089, 513, 1841, 7040, 2597, 64077, 55526, 9167, 518, 516, 388753, 515, 514, 9377, 2631, 53343, 10312, 226, 10591, 4436, 54541, 440567, 522, 790, 5631, 521, 54205, 523, 3939, 10606, 54949, 1633, 526…	3840	231	9145	1.51551	3.94433e-07	1.19525e-08	7.97898e-08
GOTERM_CC_FAT	GO:0098803~respiratory chain complex	55	1.29381	4.00581e-11	1351, 29796, 4697, 374291, 6390, 6391, 1349, 1329, 1327, 7381, 4695, 4696, 1337, 4694, 7388, 7386, 7384, 54539, 4709, 4707, 4708, 4706, 4704, 4701, 4702, 4700, 4731, 27089, 126328, 9377, 4728, 4716, 4717, 4718, 4729, 4712, 55572, 4713, 4723, 790955, 4714, 4726, 51079, 4725, 4715, 440567, 4720, 4710, 4722, 4711, 11315, 55967, 1537, 56901, 617	3699	65	8545	1.95469	5.27565e-08	4.05819e-09	6.55102e-08
GOTERM_BP_FAT	GO:0042773~ATP synthesis coupled electron transport	61	1.43496	4.4363e-11	1352, 1351, 29796, 4697, 374291, 6391, 1349, 1345, 1340, 1329, 1327, 7381, 4695, 4696, 1337, 4694, 7388, 7386, 7384, 54539, 4709, 4707, 4708, 4706, 4704, 4701, 4702, 4700, 10975, 4731, 27089, 9167, 6901, 126328, 57017, 388753, 9377, 4728, 4716, 4717, 4718, 4729, 4712, 4723, 4713, 4726, 790955, 4714, 51079, 4725, 4715, 4720, 440567, 4722, 4710, 4711, 11315, 55967, 54205, 1537, 54949	3840	76	9145	1.91148	4.48243e-07	1.31836e-08	9.0675e-08
GOTERM_BP_FAT	GO:0033238~regulation of cellular amine metabolic process	49	1.15267	5.4552e-11	5682, 9861, 1312, 5686, 5685, 5684, 5683, 9491, 10197, 3251, 5708, 5709, 5706, 5707, 5704, 5691, 5705, 5690, 5702, 5693, 5692, 5700, 5695, 5701, 5694, 5696, 5687, 5688, 9056, 5689, 5717, 5718, 5719, 5710, 5713, 5714, 5715, 5716, 23198, 4946, 5699, 5698, 51582, 25953, 10213, 5720, 5721, 11315, 4953	3840	57	9145	2.04726	5.51192e-07	1.57484e-08	1.11501e-07
GOTERM_BP_FAT	GO:0009126~purine nucleoside monophosphate metabolic process	137	3.22277	6.49541e-11	22978, 29796, 4697, 5230, 159, 158, 5634, 9551, 374291, 7167, 481, 3098, 204, 5223, 1329, 3091, 1327, 3692, 271, 10476, 471, 4695, 4696, 2023, 4694, 5214, 29789, 10165, 54539, 7415, 3312, 27089, 513, 7040, 2597, 64077, 55526, 9167, 518, 516, 388753, 515, 514, 9377, 2631, 53343, 10312, 226, 4436, 54541, 440567, 522, 521, 5631, 54205, 523, 3939, 10606, 54949, 526, 2821, 1352, 84300, 1351, 2584, 834…	3840	213	9145	1.53177	6.56297e-07	1.82305e-08	1.32762e-07
GOTERM_BP_FAT	GO:0009167~purine ribonucleoside monophosphate metabolic process	137	3.22277	6.49541e-11	22978, 29796, 4697, 5230, 159, 158, 5634, 9551, 374291, 7167, 481, 3098, 204, 5223, 1329, 3091, 1327, 3692, 271, 10476, 471, 4695, 4696, 2023, 4694, 5214, 29789, 10165, 54539, 7415, 3312, 27089, 513, 7040, 2597, 64077, 55526, 9167, 518, 516, 388753, 515, 514, 9377, 2631, 53343, 10312, 226, 4436, 54541, 440567, 522, 521, 5631, 54205, 523, 3939, 10606, 54949, 526, 2821, 1352, 84300, 1351, 2584, 834…	3840	213	9145	1.53177	6.56297e-07	1.82305e-08	1.32762e-07
GOTERM_BP_FAT	GO:0044770~cell cycle phase transition	254	5.97506	6.90754e-11	51379, 8882, 8883, 805, 6873, 332, 5371, 9861, 55544, 6868, 7164, 1977, 1978, 4218, 23649, 207, 1719, 1981, 7175, 84687, 4221, 11331, 1457, 55920, 55215, 1453, 128239, 348654, 22919, 51499, 25906, 7040, 7332, 1069, 25904, 5347, 79621, 328, 128866, 10213, 2305, 1063, 1062, 9183, 10498, 7321, 55388, 7324, 9184, 203068, 808, 79447, 988, 6597, 8636, 286053, 9700, 983, 10383, 9491, 84967, 701, 51529, …	3840	445	9145	1.35933	6.97938e-07	1.88632e-08	1.41186e-07
GOTERM_BP_FAT	GO:0009161~ribonucleoside monophosphate metabolic process	141	3.31687	7.79281e-11	22978, 29796, 5230, 4697, 159, 158, 5634, 9551, 374291, 7167, 481, 3098, 204, 5223, 1329, 3091, 1327, 3692, 271, 10476, 471, 4695, 4696, 2023, 4694, 5214, 29789, 10165, 54539, 7415, 3312, 27089, 513, 7040, 2597, 64077, 55526, 9167, 518, 516, 388753, 515, 514, 9377, 2631, 53343, 10312, 226, 4436, 54541, 440567, 522, 790, 5631, 521, 54205, 523, 3939, 10606, 54949, 526, 2821, 1352, 84300, 1351, 2584…	3840	221	9145	1.51943	7.87385e-07	2.07207e-08	1.5928e-07
GOTERM_BP_FAT	GO:0042775~mitochondrial ATP synthesis coupled electron transport	60	1.41143	8.43523e-11	1352, 1351, 29796, 4697, 374291, 6391, 1349, 1345, 1340, 1329, 1327, 7381, 4695, 4696, 1337, 4694, 7388, 7386, 7384, 54539, 4709, 4707, 4708, 4706, 4704, 4701, 4702, 4700, 10975, 4731, 27089, 9167, 6901, 126328, 57017, 9377, 4728, 4716, 4717, 4718, 4729, 4712, 4723, 4713, 4726, 790955, 4714, 51079, 4725, 4715, 4720, 440567, 4722, 4710, 4711, 11315, 55967, 54205, 1537, 54949	3840	75	9145	1.90521	8.52295e-07	2.18537e-08	1.72411e-07
GOTERM_BP_FAT	GO:0071166~ribonucleoprotein complex localization	84	1.97601	8.56788e-11	55746, 23511, 26121, 23279, 79902, 4927, 51634, 80145, 84248, 10921, 11097, 1977, 3921, 29894, 53981, 23225, 84946, 55795, 23212, 4686, 9818, 100101267, 4116, 79228, 7979, 96764, 3692, 57122, 23165, 8683, 6059, 7307, 7884, 11338, 7175, 1984, 9688, 5976, 3181, 10762, 65109, 55706, 23636, 65083, 79023, 26993, 7514, 9984, 26019, 8106, 56943, 9887, 51692, 9883, 84324, 9775, 29107, 348995, 81608, 8480…	3840	116	9145	1.72454	8.65698e-07	2.16425e-08	1.75122e-07
GOTERM_BP_FAT	GO:0009199~ribonucleoside triphosphate metabolic process	133	3.12868	8.68002e-11	29796, 4697, 5230, 9551, 374291, 7167, 481, 3098, 204, 5223, 1329, 3091, 1327, 3692, 271, 4833, 4830, 10476, 4831, 4832, 4695, 4696, 2023, 4694, 55034, 5214, 9054, 29789, 10165, 54539, 7415, 3312, 27089, 513, 7040, 2597, 1503, 55526, 9167, 518, 516, 388753, 515, 514, 9377, 2631, 10312, 226, 4436, 54541, 440567, 2773, 522, 790, 521, 54205, 523, 3939, 54949, 526, 2821, 1352, 84300, 1351, 2584, 8344…	3840	206	9145	1.53758	8.77028e-07	2.13909e-08	1.77414e-07
GOTERM_CC_FAT	GO:0044455~mitochondrial membrane part	112	2.63467	9.61116e-11	29796, 4697, 9556, 55744, 9551, 374291, 89941, 56993, 84134, 1329, 63933, 1327, 23456, 9868, 54927, 10476, 4695, 4696, 92609, 4694, 54539, 9804, 10939, 440574, 27089, 513, 622, 9167, 518, 93974, 516, 515, 514, 401505, 9377, 440567, 3329, 522, 521, 29090, 134266, 79135, 56901, 55013, 617, 55139, 1351, 10245, 26519, 8834, 6390, 6391, 125988, 1349, 1347, 10440, 578, 509, 637, 10058, 80273, 10105, 73…	3699	163	8545	1.5873	1.26579e-07	9.04135e-09	1.57179e-07
KEGG_PATHWAY	hsa05012:Parkinson's disease	82	1.92896	9.81429e-11	1351, 29796, 4697, 9246, 374291, 6390, 6391, 1349, 1347, 51465, 1345, 1340, 1329, 509, 1327, 7314, 836, 10105, 7381, 7345, 10476, 4695, 4696, 1337, 7388, 4694, 7386, 7384, 54539, 4709, 4707, 4708, 4706, 5413, 4704, 7416, 4701, 7417, 4702, 118424, 10975, 7419, 27429, 4700, 4731, 27089, 513, 7332, 9167, 126328, 518, 516, 515, 514, 9377, 4728, 4716, 4717, 4718, 4729, 4712, 4723, 4713, 7317, 4726, 47…	1836	107	4044	1.68798	2.84615e-08	9.48715e-09	1.3047e-07
GOTERM_CC_FAT	GO:0044427~chromosomal part	325	7.64526	1.12306e-10	4796, 55746, 6772, 63922, 54107, 332, 6874, 2332, 54108, 5371, 10609, 51377, 23279, 79902, 10615, 6612, 29128, 56915, 2956, 65057, 10714, 23649, 55226, 79711, 3297, 10473, 4605, 114799, 8726, 7175, 7341, 4221, 55651, 6603, 84893, 8208, 23126, 10728, 11335, 1457, 8243, 55920, 10320, 55723, 84295, 84296, 7227, 9984, 23397, 7329, 348235, 25909, 5347, 328, 10592, 7317, 3835, 1063, 1062, 53615, 9894, …	3699	578	8545	1.29892	1.47907e-07	9.86046e-09	1.83663e-07
GOTERM_MF_FAT	GO:1901363~heterocyclic compound binding	1711	40.2494	1.16189e-10	10999, 23658, 80742, 63922, 6873, 6874, 29028, 5371, 63925, 10992, 26608, 6499, 2956, 537, 6498, 23649, 6882, 6883, 6885, 63931, 3298, 3297, 5359, 10097, 10096, 6875, 1810, 6878, 547, 84893, 8243, 51493, 8242, 140576, 51491, 6891, 22919, 6890, 6895, 8241, 6894, 10084, 513, 2975, 1841, 2976, 2971, 22928, 5347, 2972, 388228, 1445, 79837, 5339, 10075, 115362, 6897, 84875, 10073, 1832, 523, 2963, 229…	3557	3728	8462	1.09185	3.0941e-07	7.73526e-08	2.06441e-07
GOTERM_CC_FAT	GO:0000502~proteasome complex	53	1.24677	1.5015e-10	5682, 9861, 51377, 5686, 5685, 5684, 5683, 9491, 10197, 5886, 9690, 5708, 5709, 5706, 5707, 9352, 5704, 5691, 5705, 5690, 5702, 5693, 5692, 5700, 7979, 5695, 5701, 5694, 5696, 5687, 5688, 5689, 56893, 11047, 5717, 5718, 56984, 5719, 9097, 7415, 5710, 5713, 5714, 5715, 3315, 5716, 23198, 5699, 5698, 84262, 10213, 5720, 5721	3699	63	8545	1.9434	1.97747e-07	1.23592e-08	2.45552e-07
GOTERM_BP_FAT	GO:0019882~antigen processing and presentation	111	2.61115	1.69196e-10	10890, 22872, 29127, 83871, 9861, 1520, 2207, 10134, 4688, 3136, 9871, 7879, 1514, 162, 1512, 11004, 160, 1515, 3127, 5971, 6891, 6892, 6890, 8943, 1785, 821, 8655, 23198, 9632, 3797, 1509, 3134, 22920, 84516, 5699, 5698, 811, 3115, 3117, 3118, 3119, 3832, 10213, 3835, 1062, 11021, 10121, 3123, 3122, 5682, 24137, 5686, 5685, 5684, 3383, 5683, 9491, 9493, 10197, 3107, 6396, 3106, 3109, 3105, 5708,…	3840	166	9145	1.59246	1.70955e-06	4.07037e-08	3.45825e-07
GOTERM_CC_FAT	GO:0031966~mitochondrial membrane	306	7.19831	1.74826e-10	51373, 55744, 55847, 51081, 374291, 118980, 94097, 740, 54998, 3098, 204, 1329, 63933, 1327, 63931, 55750, 1593, 9868, 10476, 10478, 203427, 92609, 11331, 23788, 23787, 119559, 55210, 27089, 513, 10730, 622, 55669, 6472, 518, 516, 515, 514, 401505, 1468, 55735, 9997, 10884, 5245, 94081, 522, 521, 134266, 56901, 617, 55486, 23380, 55139, 122704, 84300, 51537, 11222, 10245, 10953, 192111, 28976, 28…	3699	541	8545	1.30663	2.30246e-07	1.35439e-08	2.85907e-07
GOTERM_BP_FAT	GO:0009141~nucleoside triphosphate metabolic process	140	3.29334	1.90399e-10	29796, 5230, 4697, 7298, 9551, 374291, 7167, 481, 3098, 204, 5223, 1329, 3091, 1327, 3692, 271, 4833, 4830, 10476, 4831, 4832, 1716, 4695, 4696, 2023, 55034, 4694, 5214, 9054, 29789, 10165, 54539, 7415, 3312, 27089, 513, 1841, 7040, 2597, 1503, 55526, 9167, 518, 516, 388753, 515, 514, 9377, 2631, 10312, 226, 4436, 54541, 440567, 2773, 522, 790, 521, 129607, 54205, 523, 3939, 54949, 526, 2821, 135…	3840	221	9145	1.50865	1.92379e-06	4.47393e-08	3.89163e-07
GOTERM_CC_FAT	GO:0044429~mitochondrial part	415	9.76241	2.83881e-10	51373, 374291, 55379, 118980, 94097, 740, 204, 1329, 63933, 1327, 63931, 1716, 23788, 23787, 119559, 211, 78988, 55210, 219, 51499, 27089, 513, 10730, 1841, 622, 6472, 518, 516, 515, 514, 401505, 10884, 5245, 94081, 522, 521, 51287, 617, 55486, 122704, 55139, 10953, 192111, 28976, 27166, 8050, 28977, 8834, 28973, 57380, 6390, 6391, 10651, 57486, 572, 647087, 10061, 578, 708, 10063, 706, 79751, 10…	3699	767	8545	1.24991	3.73871e-07	2.07706e-08	4.64253e-07
GOTERM_BP_FAT	GO:0071426~ribonucleoprotein complex export from nucleus	79	1.85839	3.15116e-10	55746, 23511, 23279, 79902, 4927, 51634, 80145, 84248, 10921, 11097, 1977, 3921, 29894, 53981, 23225, 84946, 55795, 23212, 4686, 9818, 100101267, 4116, 79228, 7979, 3692, 57122, 23165, 8683, 6059, 7307, 7884, 11338, 7175, 1984, 9688, 5976, 3181, 10762, 65109, 55706, 23636, 65083, 79023, 7514, 9984, 26019, 8106, 56943, 9887, 51692, 9883, 84324, 9775, 29107, 348995, 81608, 8480, 84321, 10772, 9631,…	3840	109	9145	1.72605	3.18393e-06	7.23621e-08	6.44077e-07
GOTERM_MF_FAT	GO:0097159~organic cyclic compound binding	1719	40.4375	3.60634e-10	10999, 23658, 80742, 63922, 6873, 6874, 29028, 5371, 63925, 10992, 26608, 6499, 2956, 537, 6498, 23649, 6882, 6883, 6885, 63931, 3298, 3297, 5359, 10097, 10096, 6875, 1810, 6878, 547, 84893, 8243, 51493, 8242, 140576, 51491, 6891, 22919, 6890, 6895, 8241, 6894, 10084, 513, 2975, 1841, 2976, 2971, 22928, 5347, 2972, 388228, 1445, 79837, 5339, 10075, 115362, 6897, 84875, 10073, 1832, 523, 2963, 229…	3557	3756	8462	1.08878	9.60367e-07	1.92073e-07	6.40765e-07
GOTERM_BP_FAT	GO:0051443~positive regulation of ubiquitin-protein transferase activity	69	1.62315	4.35511e-10	84930, 5682, 9861, 5686, 5685, 5684, 5683, 983, 9491, 27338, 10197, 701, 51529, 57761, 5708, 5709, 5706, 5707, 5691, 5704, 5690, 5705, 5693, 5702, 5692, 5695, 5700, 7314, 5694, 5701, 7311, 5696, 5687, 5688, 5689, 8454, 8312, 51434, 51433, 4085, 5717, 5718, 5719, 10273, 5710, 5713, 5714, 5715, 5716, 25906, 23198, 7332, 51343, 7334, 54165, 5347, 5699, 5698, 5300, 11065, 10213, 5720, 5721, 7321, 732…	3840	92	9145	1.78613	4.4004e-06	9.77868e-08	8.90157e-07
GOTERM_BP_FAT	GO:0022411~cellular component disassembly	232	5.45754	4.40599e-10	55746, 23511, 51373, 2335, 55239, 51081, 23279, 2339, 79902, 59341, 3925, 740, 11097, 2011, 2010, 2201, 54998, 5747, 3091, 100101267, 63931, 3297, 51765, 7175, 8312, 1984, 84687, 6603, 7076, 23636, 126731, 822, 823, 23399, 829, 826, 176, 81858, 9883, 1072, 7040, 5347, 11344, 8428, 3837, 3836, 10884, 8751, 5341, 10211, 3936, 9181, 4241, 122704, 6599, 10247, 6598, 51534, 6597, 11222, 83442, 84305, …	3840	406	9145	1.36086	4.4518e-06	9.67785e-08	9.00556e-07
GOTERM_BP_FAT	GO:0009205~purine ribonucleoside triphosphate metabolic process	128	3.01106	4.74509e-10	29796, 4697, 5230, 9551, 374291, 7167, 481, 3098, 204, 5223, 1329, 3091, 1327, 3692, 271, 4833, 4830, 10476, 4831, 4832, 4695, 4696, 2023, 4694, 55034, 5214, 9054, 29789, 10165, 54539, 7415, 3312, 27089, 513, 7040, 2597, 55526, 9167, 518, 516, 388753, 515, 514, 9377, 2631, 10312, 226, 4436, 54541, 440567, 2773, 522, 521, 54205, 523, 3939, 54949, 526, 2821, 1352, 84300, 1351, 2584, 83440, 90480, 6…	3840	200	9145	1.52417	4.79443e-06	1.02009e-07	9.69865e-07
GOTERM_BP_FAT	GO:0006457~protein folding	114	2.68172	6.09672e-10	10130, 7295, 10549, 59345, 131474, 3338, 3336, 10694, 2288, 79087, 9141, 9049, 8877, 10131, 23071, 64215, 26973, 10808, 11140, 9352, 10471, 23640, 7411, 23065, 7203, 10728, 10726, 1457, 3998, 3313, 16, 3312, 6950, 56886, 821, 2783, 83460, 51303, 4802, 121506, 3320, 23193, 81567, 1460, 7184, 811, 79031, 51182, 3326, 2773, 3329, 2280, 23184, 2782, 134266, 2286, 908, 2287, 27000, 81572, 9601, 10856,…	3840	174	9145	1.5603	6.16011e-06	1.28336e-07	1.24613e-06
GOTERM_BP_FAT	GO:0006405~RNA export from nucleus	79	1.85839	6.40151e-10	55746, 23511, 23279, 79902, 4927, 51634, 80145, 84248, 10921, 11097, 1977, 3921, 10657, 29894, 53981, 23225, 55795, 4686, 9818, 100101267, 4116, 79228, 7979, 57122, 23165, 8683, 7307, 7884, 11338, 7175, 1984, 9688, 5976, 3181, 10762, 65109, 55706, 23636, 65083, 79023, 26993, 9984, 26019, 8106, 57510, 56943, 9887, 51692, 9883, 84324, 9775, 29107, 348995, 81608, 8480, 84321, 10772, 9631, 9939, 6432…	3840	110	9145	1.71036	6.46807e-06	1.32002e-07	1.30843e-06
GOTERM_BP_FAT	GO:0046034~ATP metabolic process	119	2.79934	8.1082e-10	29796, 4697, 5230, 9551, 374291, 7167, 481, 3098, 204, 5223, 1329, 3091, 1327, 3692, 271, 10476, 4695, 4696, 2023, 4694, 5214, 29789, 10165, 54539, 7415, 3312, 27089, 513, 7040, 2597, 55526, 9167, 518, 516, 388753, 515, 514, 9377, 2631, 10312, 226, 4436, 54541, 440567, 522, 521, 54205, 523, 3939, 54949, 526, 2821, 1352, 84300, 1351, 2584, 83440, 90480, 6391, 30968, 1349, 572, 1345, 706, 3304, 639…	3840	184	9145	1.54022	8.19249e-06	1.6385e-07	1.65726e-06
GOTERM_BP_FAT	GO:0009144~purine nucleoside triphosphate metabolic process	130	3.0581	8.23577e-10	29796, 4697, 5230, 9551, 374291, 7167, 481, 3098, 204, 5223, 1329, 3091, 1327, 3692, 271, 4833, 4830, 10476, 4831, 4832, 1716, 4695, 4696, 2023, 4694, 55034, 5214, 9054, 29789, 10165, 54539, 7415, 3312, 27089, 513, 7040, 2597, 55526, 9167, 518, 516, 388753, 515, 514, 9377, 2631, 10312, 226, 4436, 54541, 440567, 2773, 522, 521, 54205, 523, 3939, 54949, 526, 2821, 1352, 84300, 1351, 2584, 83440, 55…	3840	205	9145	1.51023	8.32139e-06	1.63165e-07	1.68334e-06
GOTERM_BP_FAT	GO:0008380~RNA splicing	198	4.65773	8.2873e-10	55749, 8882, 1477, 23658, 1479, 8220, 1478, 2332, 10992, 10898, 55544, 79084, 10713, 4116, 51163, 11338, 7072, 10625, 84991, 84687, 6607, 83707, 51493, 51593, 9984, 8106, 55110, 51690, 8241, 51692, 51691, 10084, 1994, 79622, 55660, 9991, 284695, 10212, 10492, 10073, 22913, 2963, 22916, 55677, 988, 83443, 84967, 55131, 10656, 708, 10657, 4841, 10236, 79228, 96764, 55269, 8449, 8458, 84950, 23028, …	3840	339	9145	1.39097	8.37345e-06	1.61029e-07	1.69387e-06
GOTERM_CC_FAT	GO:0070469~respiratory chain	60	1.41143	9.29782e-10	1351, 29796, 4697, 374291, 6390, 6391, 1349, 1347, 1329, 1327, 7381, 4695, 4696, 1337, 4694, 7388, 7386, 7384, 54539, 4709, 4707, 4708, 4706, 4704, 4701, 4702, 10975, 4700, 4731, 27089, 9167, 126328, 9377, 4728, 4716, 4717, 4718, 4729, 4712, 4723, 55572, 4713, 4726, 790955, 4714, 51079, 4725, 4715, 4720, 440567, 4722, 4710, 4711, 11315, 54205, 55967, 1537, 56901, 617, 192286	3699	76	8545	1.82375	1.22452e-06	6.44486e-08	1.52055e-06
GOTERM_BP_FAT	GO:0044772~mitotic cell cycle phase transition	238	5.59868	1.01574e-09	51379, 8882, 8883, 805, 6873, 332, 9861, 5371, 55544, 6868, 7164, 1977, 1978, 4218, 23649, 207, 1719, 1981, 7175, 84687, 11331, 1457, 55920, 55215, 1453, 128239, 348654, 22919, 51499, 25906, 7040, 1069, 25904, 5347, 79621, 328, 128866, 10213, 2305, 1063, 1062, 9183, 10498, 7321, 55388, 7324, 9184, 203068, 808, 6597, 8636, 286053, 9700, 983, 10383, 9491, 84967, 701, 51529, 10657, 5116, 5708, 55795…	3840	421	9145	1.34632	1.02629e-05	1.93641e-07	2.0761e-06
GOTERM_BP_FAT	GO:0038061~NIK/NF-kappaB signaling	66	1.55258	1.11129e-09	3146, 5682, 330, 9861, 5686, 5685, 5684, 5683, 9491, 10197, 84868, 9040, 81, 5708, 5709, 5706, 5707, 5691, 5704, 5690, 5705, 5693, 5702, 6885, 5692, 5695, 51094, 5700, 7314, 5694, 5701, 7311, 5696, 5687, 5688, 5689, 8454, 9641, 4791, 5717, 5718, 5719, 5971, 5970, 5710, 5713, 5714, 5610, 5715, 6188, 5716, 7186, 23198, 8904, 3654, 5699, 5698, 9770, 811, 9618, 10213, 5720, 5721, 5531, 1116, 9039	3840	88	9145	1.78613	1.12284e-05	2.07934e-07	2.2714e-06
GOTERM_BP_FAT	GO:2000060~positive regulation of protein ubiquitination involved in ubiquitin-dependent protein catabolic process	63	1.482	1.25514e-09	5682, 26263, 9861, 5686, 5685, 5684, 5683, 983, 9491, 10197, 701, 51529, 5747, 5708, 5709, 5706, 5707, 5691, 5704, 5690, 5705, 5693, 5702, 5692, 5700, 7314, 5695, 5701, 5694, 7311, 5696, 5687, 5688, 5689, 8454, 8312, 51434, 51433, 4085, 5717, 5718, 5719, 28952, 5710, 5713, 5714, 5715, 5716, 25906, 23198, 51343, 5347, 5699, 5698, 11065, 10213, 5720, 5721, 7321, 7324, 9184, 991, 891	3840	83	9145	1.80765	1.26818e-05	2.3058e-07	2.56542e-06
GOTERM_BP_FAT	GO:0071103~DNA conformation change	106	2.49353	1.73655e-09	7290, 3148, 3149, 1108, 3146, 3005, 9555, 3006, 29855, 9557, 79903, 8125, 10541, 387103, 79682, 6418, 26155, 54623, 29781, 54892, 9918, 79711, 1616, 8940, 7175, 23310, 84893, 10146, 8208, 201254, 5931, 55723, 84296, 81611, 26993, 23397, 113130, 51203, 2068, 23198, 1069, 7520, 9978, 1642, 54069, 4173, 4172, 4175, 23523, 4174, 4176, 10592, 8370, 3014, 4171, 3020, 891, 85236, 2968, 85453, 64151, 108…	3840	161	9145	1.56795	1.7546e-05	3.13324e-07	3.5494e-06
GOTERM_CC_FAT	GO:0005746~mitochondrial respiratory chain	57	1.34086	2.20598e-09	1351, 29796, 4697, 374291, 6390, 6391, 1349, 1347, 1329, 1327, 7381, 4695, 4696, 1337, 4694, 7388, 7386, 7384, 54539, 4709, 4707, 4708, 4706, 4704, 4701, 4702, 4700, 4731, 27089, 9167, 126328, 9377, 4728, 4716, 4717, 4718, 4729, 4712, 55572, 4713, 4723, 4726, 790955, 4714, 51079, 4725, 4715, 4720, 440567, 4710, 4722, 4711, 11315, 55967, 1537, 56901, 617	3699	72	8545	1.82882	2.90527e-06	1.45264e-07	3.60761e-06
GOTERM_BP_FAT	GO:0006974~cellular response to DNA damage stimulus	320	7.52764	2.29251e-09	4796, 23514, 2332, 5371, 51377, 55544, 7353, 6612, 29128, 2956, 65057, 6498, 10714, 6613, 602, 51567, 207, 56647, 7341, 4221, 84893, 8208, 55215, 8243, 84296, 1453, 9984, 348654, 7329, 51499, 387893, 7334, 7335, 1069, 25904, 5347, 7336, 6749, 9978, 55666, 79621, 8445, 328, 10212, 221927, 10213, 7317, 65123, 2305, 3835, 51588, 7319, 10075, 10498, 55388, 286257, 79447, 2968, 83932, 4350, 988, 6598,…	3840	595	9145	1.28081	2.31633e-05	4.06377e-07	4.68574e-06
GOTERM_BP_FAT	GO:0031123~RNA 3'-end processing	74	1.74077	2.35244e-09	11052, 1477, 2091, 1479, 6829, 1478, 10898, 54512, 80145, 25896, 10921, 87178, 23404, 56915, 3921, 29894, 53981, 54623, 51010, 4686, 4116, 79228, 8683, 3297, 6832, 7307, 7884, 25888, 11338, 10914, 7936, 79650, 26986, 65109, 11340, 9984, 8106, 90459, 118460, 51692, 10978, 29101, 84324, 9775, 23016, 81608, 8189, 84321, 26173, 9810, 6626, 9939, 6432, 8563, 79033, 55149, 79577, 2926, 10212, 1736, 260…	3840	103	9145	1.71099	2.37687e-05	4.09811e-07	4.80823e-06
GOTERM_BP_FAT	GO:0071427~mRNA-containing ribonucleoprotein complex export from nucleus	70	1.64667	2.4584e-09	55746, 23511, 23279, 79902, 51634, 4927, 80145, 84248, 10921, 11097, 1977, 29894, 23225, 53981, 55795, 4686, 9818, 100101267, 4116, 79228, 7979, 57122, 23165, 8683, 7307, 7884, 11338, 7175, 1984, 9688, 5976, 3181, 10762, 65109, 55706, 23636, 79023, 9984, 26019, 8106, 56943, 9887, 51692, 9883, 84324, 9775, 29107, 348995, 81608, 8480, 84321, 10772, 9631, 9939, 6432, 8563, 10212, 26097, 23144, 22916…	3840	96	9145	1.73652	2.48394e-05	4.21012e-07	5.02481e-06
GOTERM_BP_FAT	GO:0006406~mRNA export from nucleus	70	1.64667	2.4584e-09	55746, 23511, 23279, 79902, 51634, 4927, 80145, 84248, 10921, 11097, 1977, 29894, 23225, 53981, 55795, 4686, 9818, 100101267, 4116, 79228, 7979, 57122, 23165, 8683, 7307, 7884, 11338, 7175, 1984, 9688, 5976, 3181, 10762, 65109, 55706, 23636, 79023, 9984, 26019, 8106, 56943, 9887, 51692, 9883, 84324, 9775, 29107, 348995, 81608, 8480, 84321, 10772, 9631, 9939, 6432, 8563, 10212, 26097, 23144, 22916…	3840	96	9145	1.73652	2.48394e-05	4.21012e-07	5.02481e-06
GOTERM_BP_FAT	GO:0009116~nucleoside metabolic process	174	4.09315	2.49039e-09	22978, 29796, 5230, 4697, 7298, 159, 5635, 158, 5634, 5636, 9551, 374291, 7167, 481, 79717, 3098, 204, 5223, 1329, 3091, 1327, 3692, 271, 4833, 79691, 4830, 10476, 4831, 471, 4832, 1716, 11332, 4695, 4696, 2023, 55034, 4694, 5214, 9054, 29789, 10165, 54539, 347734, 7415, 3312, 1788, 27089, 513, 7040, 2597, 1503, 55526, 9167, 518, 93974, 516, 388753, 515, 514, 9377, 2631, 53343, 10312, 79031, 226,…	3840	294	9145	1.40947	2.51625e-05	4.19381e-07	5.09019e-06
GOTERM_BP_FAT	GO:0031397~negative regulation of protein ubiquitination	81	1.90543	3.20313e-09	54552, 6659, 5682, 23551, 10196, 5371, 9861, 5686, 5685, 5684, 5683, 983, 9491, 10197, 64359, 701, 51529, 706, 3304, 9636, 5708, 3301, 5709, 5706, 3303, 5707, 5691, 5704, 5690, 5705, 5693, 5702, 5692, 5695, 7314, 5700, 5694, 5701, 51160, 7311, 5696, 5687, 409, 5688, 5689, 55611, 51434, 374969, 51433, 4085, 5717, 5718, 5719, 1029, 5710, 5713, 5714, 5715, 6188, 55869, 5716, 3984, 25906, 51343, 5699…	3840	116	9145	1.66295	3.23639e-05	5.30564e-07	6.54699e-06
GOTERM_CC_FAT	GO:0030684~preribosome	56	1.31734	4.00951e-09	56342, 2091, 92856, 9790, 54663, 90441, 10199, 55813, 55272, 23076, 3921, 79080, 81887, 26155, 55127, 55759, 84946, 23212, 51018, 3692, 79050, 22984, 10969, 10436, 25879, 51096, 84549, 10813, 54881, 65083, 84294, 117246, 27042, 10528, 55720, 23481, 14, 25983, 5822, 51154, 5303, 4809, 8568, 23246, 27341, 10885, 9277, 51388, 51118, 6176, 9136, 88745, 51602, 6201, 10607, 84319	3699	71	8545	1.82204	5.28052e-06	2.51454e-07	6.55708e-06
GOTERM_BP_FAT	GO:0042254~ribosome biogenesis	177	4.16373	5.01175e-09	56342, 26168, 2091, 26164, 51001, 6204, 10200, 51081, 54512, 6169, 4927, 54913, 90441, 56915, 23076, 11157, 79080, 3921, 64216, 55027, 26155, 51010, 55759, 84946, 55052, 51013, 55226, 6217, 51018, 3692, 22984, 6158, 6157, 5036, 79697, 6156, 79897, 51096, 6223, 55651, 84549, 10813, 4931, 26354, 4839, 54881, 65083, 84294, 117246, 11340, 51491, 1453, 10528, 7514, 54680, 51202, 84128, 90459, 26284, 5…	3840	302	9145	1.39579	5.06374e-05	8.16753e-07	1.02437e-05
GOTERM_BP_FAT	GO:0022900~electron transport chain	66	1.55258	5.19242e-09	1352, 1351, 29796, 4697, 374291, 6390, 6391, 1349, 1345, 1340, 1329, 1327, 7381, 4695, 4696, 1337, 4694, 7388, 7386, 10165, 7384, 54539, 4709, 4707, 4708, 4706, 4704, 4701, 4702, 10975, 4700, 4731, 27089, 6901, 9167, 126328, 57017, 388753, 9377, 10514, 4728, 4716, 4717, 9997, 4718, 4729, 4712, 4723, 4713, 4726, 790955, 4714, 51079, 4725, 4715, 4720, 440567, 4722, 4710, 4711, 11315, 1537, 54205, 5…	3840	90	9145	1.74644	5.24629e-05	8.32765e-07	1.0613e-05
GOTERM_CC_FAT	GO:0098687~chromosomal region	154	3.62268	5.60882e-09	55746, 332, 9555, 10403, 2332, 5371, 23279, 54908, 79902, 387103, 79682, 10615, 6612, 65057, 55226, 9918, 9735, 79980, 1616, 11004, 7175, 54820, 10910, 55055, 55651, 4221, 23310, 10728, 201254, 11335, 55920, 8243, 10320, 11130, 84295, 170506, 79023, 7514, 9984, 113130, 1786, 25983, 1788, 10428, 8655, 348235, 25909, 9025, 5347, 7520, 84516, 1642, 84321, 54069, 9770, 4173, 8379, 4172, 4175, 4174, 5…	3699	250	8545	1.42301	7.38678e-06	3.35764e-07	9.17255e-06
GOTERM_BP_FAT	GO:0007059~chromosome segregation	144	3.38744	6.36607e-09	55746, 29127, 332, 9555, 10403, 1104, 10609, 79903, 23279, 54908, 79902, 6421, 10919, 387103, 79682, 11011, 10615, 1894, 221496, 672, 79892, 56852, 9918, 9735, 79980, 8940, 11004, 114799, 80218, 10097, 7175, 10096, 54820, 55055, 23310, 11331, 23126, 9055, 201254, 10726, 1457, 55920, 8243, 56984, 81610, 11130, 79023, 7514, 26993, 23397, 51203, 113130, 84191, 348654, 7329, 22919, 55869, 6188, 2068,…	3840	237	9145	1.44699	6.43207e-05	1.00504e-06	1.30118e-05
GOTERM_CC_FAT	GO:0005762~mitochondrial large ribosomal subunit	40	0.940955	6.95608e-09	122704, 6182, 9801, 387338, 11222, 51069, 54534, 9553, 28977, 28998, 51253, 740, 29088, 51258, 54148, 64983, 128308, 64981, 63875, 55052, 6150, 3396, 84769, 51073, 64975, 51264, 64928, 29093, 64979, 65005, 64978, 57129, 54948, 10573, 65003, 51318, 116540, 219927, 29074, 79590	3699	46	8545	2.00877	9.16112e-06	3.98311e-07	1.13758e-05
GOTERM_CC_FAT	GO:0000315~organellar large ribosomal subunit	40	0.940955	6.95608e-09	122704, 6182, 9801, 387338, 11222, 51069, 54534, 9553, 28977, 28998, 51253, 740, 29088, 51258, 54148, 64983, 128308, 64981, 63875, 55052, 6150, 3396, 84769, 51073, 64975, 51264, 64928, 29093, 64979, 65005, 64978, 57129, 54948, 10573, 65003, 51318, 116540, 219927, 29074, 79590	3699	46	8545	2.00877	9.16112e-06	3.98311e-07	1.13758e-05
GOTERM_BP_FAT	GO:0022613~ribonucleoprotein complex biogenesis	239	5.62221	7.55344e-09	56342, 6204, 10200, 55239, 51081, 10480, 79084, 56915, 79080, 10713, 3921, 8872, 55759, 55226, 6217, 51096, 6223, 55651, 6607, 54881, 84294, 11340, 51491, 1453, 54680, 6895, 55720, 14, 115939, 10084, 23016, 55661, 83732, 10885, 90121, 51388, 81875, 88745, 10073, 6201, 10607, 56902, 9188, 64794, 11224, 27161, 10856, 113802, 92856, 54663, 55505, 55272, 81887, 708, 705, 55127, 55794, 23160, 96764, 1…	3840	430	9145	1.32368	7.6317e-05	1.17415e-06	1.54387e-05
GOTERM_CC_FAT	GO:0000228~nuclear chromosome	214	5.03411	8.4619e-09	4796, 6772, 23514, 54107, 332, 6874, 54108, 5371, 51377, 10609, 29128, 2956, 65057, 10714, 23649, 55226, 79711, 8726, 6603, 55651, 4221, 8208, 23126, 11335, 1457, 10320, 8243, 55723, 84296, 7227, 9984, 7329, 55869, 5347, 22920, 328, 10592, 53615, 7319, 55388, 222229, 85236, 988, 6599, 26039, 6598, 6597, 10856, 10951, 983, 55506, 94239, 701, 10445, 86, 63979, 8349, 3619, 5119, 5928, 79228, 56897, …	3699	369	8545	1.33972	1.11443e-05	4.64347e-07	1.38384e-05
GOTERM_BP_FAT	GO:0022904~respiratory electron transport chain	65	1.52905	9.04587e-09	1352, 1351, 29796, 4697, 374291, 6390, 6391, 1349, 1345, 1340, 1329, 1327, 7381, 4695, 4696, 1337, 4694, 7388, 7386, 10165, 7384, 54539, 4709, 4707, 4708, 4706, 4704, 4701, 4702, 10975, 4700, 4731, 27089, 6901, 9167, 126328, 57017, 388753, 9377, 10514, 4728, 4716, 4717, 9997, 4718, 4729, 4712, 4723, 4713, 4726, 790955, 4714, 51079, 4725, 4715, 4720, 440567, 4722, 4710, 4711, 11315, 54205, 55967, …	3840	89	9145	1.73931	9.13952e-05	1.38484e-06	1.84892e-05
GOTERM_BP_FAT	GO:0051438~regulation of ubiquitin-protein transferase activity	74	1.74077	9.05403e-09	84930, 5682, 9861, 5686, 5685, 5684, 5683, 983, 9491, 27338, 10197, 701, 51529, 57761, 5708, 5709, 5706, 5707, 5691, 5704, 5690, 5705, 5693, 5702, 5692, 5695, 5700, 7314, 5694, 5701, 7311, 5696, 5687, 5688, 5689, 8454, 8312, 51434, 51433, 4085, 5717, 5718, 5719, 10273, 5710, 1029, 5713, 5714, 5715, 5716, 3984, 25906, 23198, 7332, 51343, 7334, 54165, 5347, 5699, 5698, 5300, 11065, 1017, 10213, 572…	3840	105	9145	1.6784	9.14777e-05	1.3654e-06	1.85058e-05
GOTERM_CC_FAT	GO:0005730~nucleolus	386	9.08022	9.1376e-09	56342, 79706, 8882, 1476, 6772, 8886, 6204, 10200, 27067, 2332, 5371, 10609, 39, 51082, 55646, 84678, 56915, 79080, 57761, 4218, 55759, 55854, 55226, 3710, 23641, 51567, 5359, 51096, 8726, 7343, 5653, 6875, 6223, 7341, 55651, 55920, 54881, 84294, 140576, 84295, 11340, 822, 51491, 84298, 51290, 92344, 205564, 54888, 55720, 55922, 92140, 2975, 9191, 7334, 5347, 23016, 6749, 4234, 55661, 8428, 10885…	3699	722	8545	1.23503	1.20341e-05	4.81368e-07	1.49434e-05
GOTERM_BP_FAT	GO:0031398~positive regulation of protein ubiquitination	101	2.37591	9.97028e-09	22976, 84930, 26263, 330, 55743, 9861, 79142, 27338, 144165, 8877, 57761, 5747, 672, 23640, 409, 8312, 51434, 51433, 201254, 55215, 10273, 25906, 7332, 23198, 7334, 54165, 5347, 139285, 5699, 5698, 9810, 10213, 7321, 79139, 2280, 7324, 9184, 991, 891, 83932, 85453, 148022, 8767, 5682, 5686, 5685, 5684, 5683, 983, 9491, 10197, 701, 51529, 5708, 150684, 3300, 5709, 5706, 5707, 5704, 5691, 5705, 569…	3840	155	9145	1.55182	0.000100735	1.48147e-06	2.03786e-05
GOTERM_BP_FAT	GO:2000058~regulation of protein ubiquitination involved in ubiquitin-dependent protein catabolic process	66	1.55258	1.07533e-08	5682, 26263, 5371, 9861, 5686, 5685, 5684, 5683, 983, 9491, 10197, 701, 51529, 5747, 5708, 5709, 5706, 5707, 5691, 5704, 5690, 5705, 5693, 5702, 5692, 5695, 5700, 7314, 5694, 5701, 7311, 5696, 5687, 5688, 5689, 8454, 8312, 51434, 51433, 4085, 5717, 5718, 5719, 28952, 5710, 1029, 5713, 5714, 5715, 5716, 25906, 23198, 51343, 5347, 5699, 5698, 11065, 79031, 10213, 5720, 5721, 7321, 7324, 9184, 991, …	3840	91	9145	1.72725	0.000108646	1.57466e-06	2.19791e-05
GOTERM_BP_FAT	GO:0050852~T cell receptor signaling pathway	87	2.04658	1.08166e-08	6461, 784, 5682, 8767, 3783, 9861, 5686, 5062, 5685, 5684, 5683, 9491, 25865, 10197, 30968, 5777, 5795, 5708, 5709, 5706, 5707, 5691, 5704, 5690, 634, 5705, 5693, 5702, 6885, 5692, 5695, 7314, 5700, 5694, 5701, 7311, 5696, 5687, 5688, 5689, 7070, 8454, 5788, 5717, 3127, 5718, 920, 3265, 8517, 5719, 5970, 5710, 6794, 5713, 5714, 5715, 5716, 9473, 23198, 7334, 7335, 5699, 5698, 1445, 3115, 3117, 26…	3840	129	9145	1.60613	0.000109285	1.5613e-06	2.21085e-05
GOTERM_CC_FAT	GO:0000793~condensed chromosome	98	2.30534	1.08958e-08	55746, 3148, 26039, 64151, 3146, 332, 9555, 10403, 1104, 286053, 10609, 54908, 79902, 387103, 79682, 1051, 1663, 10615, 5885, 701, 134492, 9793, 5889, 3619, 5119, 23212, 672, 7283, 6839, 11243, 23219, 9918, 57122, 79980, 9735, 8940, 9212, 11004, 23476, 54820, 4751, 55055, 23310, 4085, 201254, 11335, 10051, 8243, 65083, 11130, 84295, 79023, 11073, 23397, 113130, 7329, 23481, 3364, 10428, 6790, 881…	3699	146	8545	1.5506	1.43497e-05	5.51916e-07	1.78188e-05
GOTERM_BP_FAT	GO:0002429~immune response-activating cell surface receptor signaling pathway	129	3.03458	1.11301e-08	55845, 9861, 2207, 5747, 6885, 10093, 10092, 7410, 4893, 7070, 10097, 10006, 10096, 10095, 10094, 2212, 2214, 3127, 920, 5971, 5970, 3845, 23198, 3320, 7334, 7335, 26999, 5699, 5698, 1445, 3115, 3117, 2633, 3118, 3119, 55072, 7525, 10213, 9564, 5058, 916, 3326, 7430, 7321, 3937, 7322, 3123, 5771, 3122, 6461, 784, 5894, 3783, 8767, 5682, 3385, 5062, 64581, 5686, 5685, 5684, 5683, 9491, 25865, 1019…	3840	209	9145	1.46993	0.000112452	1.58392e-06	2.27492e-05
GOTERM_BP_FAT	GO:0010608~posttranscriptional regulation of gene expression	223	5.24582	1.36497e-08	55239, 2332, 9861, 5371, 8125, 10480, 55544, 4615, 6352, 1973, 1977, 1978, 56915, 602, 8872, 23, 4116, 207, 1982, 1981, 7175, 7072, 1984, 11340, 51593, 9887, 16, 6895, 5610, 8241, 7040, 2597, 1994, 25904, 23016, 8440, 811, 328, 10213, 10492, 54487, 22916, 10605, 23381, 84300, 27161, 10247, 84305, 23173, 9491, 55272, 708, 4076, 10657, 5605, 5708, 55795, 5709, 5706, 10236, 5707, 5704, 5705, 23367, …	3840	399	9145	1.33102	0.000137908	1.91551e-06	2.78992e-05
GOTERM_BP_FAT	GO:0050658~RNA transport	98	2.30534	1.38985e-08	55746, 23511, 8570, 2332, 23279, 10204, 79902, 51634, 4927, 80145, 143244, 84248, 51637, 10921, 87178, 220988, 1977, 11097, 6396, 3921, 10657, 9793, 29894, 23225, 53981, 55795, 55916, 4686, 9818, 100101267, 4116, 79228, 7979, 57122, 8683, 23165, 7307, 7884, 11338, 7175, 9688, 1984, 4600, 5976, 29074, 3181, 10762, 65109, 55706, 23636, 65083, 9804, 79023, 7514, 9984, 26993, 26019, 55110, 57510, 810…	3840	150	9145	1.55592	0.00014042	1.9237e-06	2.84075e-05
GOTERM_BP_FAT	GO:0050657~nucleic acid transport	98	2.30534	1.38985e-08	55746, 23511, 8570, 2332, 23279, 10204, 79902, 51634, 4927, 80145, 143244, 84248, 51637, 10921, 87178, 220988, 1977, 11097, 6396, 3921, 10657, 9793, 29894, 23225, 53981, 55795, 55916, 4686, 9818, 100101267, 4116, 79228, 7979, 57122, 8683, 23165, 7307, 7884, 11338, 7175, 9688, 1984, 4600, 5976, 29074, 3181, 10762, 65109, 55706, 23636, 65083, 9804, 79023, 7514, 9984, 26993, 26019, 55110, 57510, 810…	3840	150	9145	1.55592	0.00014042	1.9237e-06	2.84075e-05
GOTERM_BP_FAT	GO:0043933~macromolecular complex subunit organization	847	19.9247	1.45873e-08	54107, 6873, 6874, 55239, 330, 29028, 63925, 54108, 5371, 949, 374291, 79084, 740, 6498, 2958, 10713, 84079, 6882, 341, 6883, 8733, 6885, 63931, 3297, 6881, 348, 10093, 10092, 8726, 10097, 6875, 10096, 1810, 10095, 10094, 7341, 79090, 8208, 23636, 8242, 126731, 6892, 22919, 6895, 10084, 22921, 7334, 8440, 6472, 22920, 55201, 128866, 916, 5341, 7319, 115362, 10075, 84875, 10073, 2963, 7324, 85236,…	3840	1767	9145	1.14156	0.00014738	1.99176e-06	2.98156e-05
GOTERM_BP_FAT	GO:1903321~negative regulation of protein modification by small protein conjugation or removal	84	1.97601	1.46729e-08	54552, 6659, 10401, 5682, 23551, 10196, 5371, 9861, 5686, 5685, 5684, 5683, 983, 9491, 10197, 64359, 701, 51529, 706, 3304, 9636, 5708, 3301, 5709, 3300, 5706, 3303, 5707, 5691, 5704, 5690, 5705, 5693, 5702, 5692, 5695, 7314, 5700, 5694, 5701, 51160, 7311, 5696, 5687, 409, 5688, 5689, 55611, 51434, 374969, 51433, 4085, 5717, 5718, 5719, 1029, 5710, 10362, 5713, 5714, 5715, 6188, 55869, 5716, 3984…	3840	124	9145	1.61328	0.000148244	1.97673e-06	2.99904e-05
KEGG_PATHWAY	hsa03040:Spliceosome	89	2.09363	1.52366e-08	988, 9343, 23658, 83443, 9410, 26121, 10992, 27339, 51729, 220988, 56259, 3192, 11157, 3190, 10713, 3304, 3303, 4686, 4116, 23450, 10907, 24148, 8683, 8449, 10915, 7307, 84950, 11338, 3183, 84991, 3310, 57461, 6637, 6635, 9984, 6636, 6633, 6634, 151903, 55110, 3312, 51690, 9092, 10523, 51691, 10084, 25804, 9775, 10946, 9129, 9128, 27258, 10262, 10465, 84844, 55660, 8896, 84321, 10772, 4809, 6626,…	1836	126	4044	1.55581	4.41859e-06	1.10465e-06	2.02554e-05
GOTERM_BP_FAT	GO:0090305~nucleic acid phosphodiester bond hydrolysis	127	2.98753	1.61863e-08	79703, 1477, 1479, 3148, 1478, 3146, 3005, 9557, 10898, 54512, 54913, 87178, 79008, 56915, 10714, 3921, 51010, 10535, 4686, 1797, 51567, 3297, 79897, 11284, 51163, 55651, 84893, 10146, 84294, 11340, 65080, 348654, 116461, 90459, 9887, 55720, 51692, 2068, 23016, 5422, 9978, 29777, 79621, 10940, 1642, 5428, 3837, 51110, 5424, 3836, 328, 5425, 5426, 79033, 1777, 27301, 25996, 81875, 88745, 283989, 8…	3840	206	9145	1.46821	0.000163533	2.15192e-06	3.30837e-05
GOTERM_BP_FAT	GO:0097031~mitochondrial respiratory chain complex I biogenesis	44	1.03505	1.64272e-08	54539, 4709, 4707, 4708, 4706, 4704, 4701, 55744, 4702, 4700, 4731, 28976, 374291, 137682, 6901, 126328, 284184, 51300, 4728, 4716, 4717, 4718, 4729, 4712, 55572, 4723, 4713, 4726, 4714, 51079, 4725, 4715, 4720, 4722, 4710, 4711, 29090, 55967, 29078, 4695, 4696, 4694, 9131, 617	3840	54	9145	1.94049	0.000165967	2.15559e-06	3.35761e-05
GOTERM_BP_FAT	GO:0032981~mitochondrial respiratory chain complex I assembly	44	1.03505	1.64272e-08	54539, 4709, 4707, 4708, 4706, 4704, 4701, 55744, 4702, 4700, 4731, 28976, 374291, 137682, 6901, 126328, 284184, 51300, 4728, 4716, 4717, 4718, 4729, 4712, 55572, 4723, 4713, 4726, 4714, 51079, 4725, 4715, 4720, 4722, 4710, 4711, 29090, 55967, 29078, 4695, 4696, 4694, 9131, 617	3840	54	9145	1.94049	0.000165967	2.15559e-06	3.35761e-05
GOTERM_BP_FAT	GO:0010257~NADH dehydrogenase complex assembly	44	1.03505	1.64272e-08	54539, 4709, 4707, 4708, 4706, 4704, 4701, 55744, 4702, 4700, 4731, 28976, 374291, 137682, 6901, 126328, 284184, 51300, 4728, 4716, 4717, 4718, 4729, 4712, 55572, 4723, 4713, 4726, 4714, 51079, 4725, 4715, 4720, 4722, 4710, 4711, 29090, 55967, 29078, 4695, 4696, 4694, 9131, 617	3840	54	9145	1.94049	0.000165967	2.15559e-06	3.35761e-05
GOTERM_BP_FAT	GO:1901987~regulation of cell cycle phase transition	160	3.76382	2.09443e-08	2146, 22976, 8883, 332, 9555, 10403, 9861, 5371, 55544, 27339, 6868, 8525, 207, 9735, 1981, 23476, 7175, 51434, 84687, 4221, 51433, 11331, 1457, 55920, 55215, 56984, 81610, 113130, 348654, 51499, 2068, 25906, 7040, 23198, 4582, 25904, 5347, 79621, 1642, 5699, 5698, 8379, 890, 699, 328, 79577, 10213, 1063, 1062, 9183, 60561, 10498, 7321, 7324, 990, 991, 9184, 891, 79447, 988, 2810, 1869, 7027, 665…	3840	272	9145	1.40089	0.000211599	2.71309e-06	4.28088e-05
GOTERM_BP_FAT	GO:1903322~positive regulation of protein modification by small protein conjugation or removal	108	2.54058	2.24653e-08	22976, 84930, 10401, 26263, 330, 55743, 9861, 79142, 27338, 144165, 8877, 57761, 5747, 672, 23640, 409, 8312, 51434, 51433, 26354, 201254, 55215, 10273, 7415, 7329, 25906, 7332, 23198, 7334, 54165, 5347, 139285, 5699, 5698, 9810, 10213, 51588, 79139, 7321, 2280, 7324, 991, 9184, 891, 83932, 85453, 148022, 8767, 5682, 23551, 5686, 5685, 5684, 983, 5683, 9491, 10197, 701, 51529, 150684, 5708, 3300,…	3840	170	9145	1.51296	0.000226964	2.87328e-06	4.59177e-05
GOTERM_BP_FAT	GO:0043624~cellular protein complex disassembly	101	2.37591	2.6692e-08	51373, 51081, 9553, 143244, 59341, 3925, 740, 128308, 118487, 54998, 55052, 6150, 63931, 64928, 11004, 1984, 84687, 79590, 9645, 55037, 9801, 6182, 126731, 822, 6183, 65080, 829, 51021, 54534, 3312, 1072, 55168, 28998, 6683, 29088, 11344, 63875, 10519, 10884, 55173, 5341, 29093, 9181, 7818, 54948, 51318, 219927, 51504, 88, 122704, 11222, 83442, 28977, 90480, 28973, 8775, 10300, 55604, 54148, 6498…	3840	157	9145	1.53205	0.00026966	3.37119e-06	5.45567e-05
GOTERM_MF_FAT	GO:0050136~NADH dehydrogenase (quinone) activity	33	0.776288	2.68291e-08	4709, 4707, 4697, 4708, 4706, 4704, 4701, 4702, 4700, 4731, 374291, 4728, 4716, 4717, 4718, 4729, 4712, 4723, 4713, 4726, 4714, 51079, 4725, 4715, 4720, 4722, 4710, 4711, 55967, 4695, 4696, 56901, 4694	3557	37	8462	2.12178	7.14433e-05	1.19076e-05	4.76692e-05
GOTERM_MF_FAT	GO:0003954~NADH dehydrogenase activity	33	0.776288	2.68291e-08	4709, 4707, 4697, 4708, 4706, 4704, 4701, 4702, 4700, 4731, 374291, 4728, 4716, 4717, 4718, 4729, 4712, 4723, 4713, 4726, 4714, 51079, 4725, 4715, 4720, 4722, 4710, 4711, 55967, 4695, 4696, 56901, 4694	3557	37	8462	2.12178	7.14433e-05	1.19076e-05	4.76692e-05
GOTERM_MF_FAT	GO:0008137~NADH dehydrogenase (ubiquinone) activity	33	0.776288	2.68291e-08	4709, 4707, 4697, 4708, 4706, 4704, 4701, 4702, 4700, 4731, 374291, 4728, 4716, 4717, 4718, 4729, 4712, 4723, 4713, 4726, 4714, 51079, 4725, 4715, 4720, 4722, 4710, 4711, 55967, 4695, 4696, 56901, 4694	3557	37	8462	2.12178	7.14433e-05	1.19076e-05	4.76692e-05
GOTERM_BP_FAT	GO:0006397~mRNA processing	217	5.10468	2.69298e-08	55749, 8882, 1477, 23658, 1479, 8220, 1478, 2332, 10992, 10898, 55544, 79084, 10713, 54998, 8732, 4116, 3297, 7884, 51163, 11338, 7072, 84991, 6607, 51593, 9984, 8106, 55110, 51690, 8241, 51692, 51691, 10084, 1994, 79622, 55660, 9991, 10212, 284695, 10492, 10073, 22913, 2963, 22916, 55677, 2968, 988, 83443, 84967, 55131, 10656, 708, 10657, 4841, 10236, 79228, 96764, 55269, 8449, 8458, 25888, 8495…	3840	389	9145	1.3285	0.000272061	3.35923e-06	5.50426e-05
GOTERM_BP_FAT	GO:0009119~ribonucleoside metabolic process	160	3.76382	2.96098e-08	22978, 29796, 5230, 4697, 159, 158, 5634, 9551, 374291, 7167, 481, 79717, 3098, 204, 5223, 1329, 3091, 1327, 3692, 271, 4833, 79691, 4830, 10476, 4831, 4832, 1716, 11332, 4695, 4696, 2023, 55034, 4694, 5214, 9054, 29789, 10165, 54539, 347734, 7415, 3312, 1788, 27089, 513, 7040, 2597, 1503, 55526, 9167, 518, 516, 388753, 515, 514, 9377, 2631, 53343, 10312, 79031, 226, 4436, 54541, 440567, 2773, 52…	3840	273	9145	1.39576	0.000299132	3.64849e-06	6.05204e-05
GOTERM_CC_FAT	GO:0045271~respiratory chain complex I	36	0.84686	2.96194e-08	54539, 4709, 4707, 4697, 4708, 4706, 4704, 4701, 4702, 4700, 4731, 374291, 126328, 4728, 4716, 4717, 4718, 4729, 4712, 55572, 4723, 4713, 4726, 4714, 51079, 4725, 4715, 4720, 4722, 4710, 4711, 11315, 55967, 4695, 4696, 4694	3699	41	8545	2.02837	3.9008e-05	1.44477e-06	4.8439e-05
GOTERM_CC_FAT	GO:0030964~NADH dehydrogenase complex	36	0.84686	2.96194e-08	54539, 4709, 4707, 4697, 4708, 4706, 4704, 4701, 4702, 4700, 4731, 374291, 126328, 4728, 4716, 4717, 4718, 4729, 4712, 55572, 4723, 4713, 4726, 4714, 51079, 4725, 4715, 4720, 4722, 4710, 4711, 11315, 55967, 4695, 4696, 4694	3699	41	8545	2.02837	3.9008e-05	1.44477e-06	4.8439e-05
GOTERM_CC_FAT	GO:0005747~mitochondrial respiratory chain complex I	36	0.84686	2.96194e-08	54539, 4709, 4707, 4697, 4708, 4706, 4704, 4701, 4702, 4700, 4731, 374291, 126328, 4728, 4716, 4717, 4718, 4729, 4712, 55572, 4723, 4713, 4726, 4714, 51079, 4725, 4715, 4720, 4722, 4710, 4711, 11315, 55967, 4695, 4696, 4694	3699	41	8545	2.02837	3.9008e-05	1.44477e-06	4.8439e-05
GOTERM_BP_FAT	GO:0051168~nuclear export	104	2.44648	3.04693e-08	23511, 55746, 7295, 84934, 23279, 10204, 79902, 10541, 4927, 51634, 10921, 11097, 1977, 2010, 3921, 84946, 4686, 4116, 100101267, 3692, 8683, 8498, 7884, 11338, 7175, 1984, 23636, 65083, 1434, 79023, 26993, 9984, 7514, 54535, 3313, 8106, 9887, 51692, 9883, 84324, 7040, 9775, 81608, 103, 84321, 9631, 811, 8563, 10212, 22916, 55677, 129401, 5433, 10189, 23381, 2810, 6659, 80145, 84248, 10657, 29894…	3840	163	9145	1.51949	0.000307814	3.70917e-06	6.22773e-05
GOTERM_BP_FAT	GO:0006323~DNA packaging	69	1.62315	3.30683e-08	7290, 3148, 64151, 3146, 3005, 3006, 9555, 29855, 79903, 8125, 10541, 983, 387103, 79682, 8260, 55506, 6418, 84629, 8971, 6662, 26155, 54623, 8349, 6732, 29781, 5119, 5928, 54892, 9918, 79711, 1616, 7175, 23310, 8208, 201254, 11044, 10051, 5931, 440093, 55723, 81611, 26993, 23397, 51203, 113130, 1029, 25842, 23198, 55839, 55355, 4678, 8520, 4676, 54069, 23523, 10036, 4869, 10592, 8370, 7153, 8607…	3840	98	9145	1.67678	0.000334066	3.97763e-06	6.75894e-05
GOTERM_BP_FAT	GO:0022402~cell cycle process	496	11.6678	3.68967e-08	79703, 51379, 8882, 8883, 805, 23511, 29127, 332, 6873, 330, 5371, 10609, 10899, 10617, 6491, 6868, 10615, 11097, 2956, 2010, 6498, 8872, 23649, 207, 3297, 1719, 10097, 10096, 10726, 55215, 23636, 55920, 8243, 126731, 348654, 7329, 22919, 51499, 387893, 7332, 5347, 79621, 85444, 811, 328, 128866, 7321, 55388, 7324, 203068, 808, 64793, 136647, 988, 6597, 8636, 984, 983, 10755, 9491, 25896, 84967, …	3840	989	9145	1.19437	0.000372735	4.38593e-06	7.54145e-05
GOTERM_BP_FAT	GO:1901657~glycosyl compound metabolic process	176	4.1402	3.69738e-08	22978, 29796, 5230, 4697, 7298, 159, 5635, 158, 5634, 5636, 9551, 374291, 7167, 481, 79717, 3098, 204, 5223, 1329, 3091, 1327, 3692, 271, 4833, 79691, 4830, 10476, 4831, 471, 4832, 1716, 11332, 4695, 4696, 2023, 55034, 4694, 5214, 9054, 29789, 10165, 54539, 347734, 7415, 3312, 1788, 27089, 513, 7040, 2597, 1503, 55526, 9167, 518, 93974, 516, 388753, 515, 514, 9377, 2631, 53343, 10312, 79031, 226,…	3840	306	9145	1.36976	0.000373514	4.34398e-06	7.5572e-05
GOTERM_BP_FAT	GO:0031396~regulation of protein ubiquitination	130	3.0581	3.81315e-08	22976, 84930, 26263, 330, 9861, 55743, 5371, 79142, 27338, 144165, 8877, 57761, 5747, 9636, 672, 51160, 23640, 409, 1616, 8312, 51434, 51433, 201254, 55215, 10273, 55869, 6188, 25906, 7332, 23198, 3320, 7334, 54165, 5347, 139285, 6478, 5699, 5698, 9810, 79031, 10213, 3326, 84875, 79139, 7321, 2280, 7324, 991, 9184, 891, 83932, 85453, 54552, 148022, 6659, 8767, 5682, 23551, 10196, 5686, 5685, 5684…	3840	214	9145	1.44671	0.000385207	4.42851e-06	7.79383e-05
KEGG_PATHWAY	hsa05016:Huntington's disease	102	2.39944	4.68091e-08	5436, 5437, 29796, 5435, 4697, 5438, 5439, 6874, 90993, 374291, 10488, 5440, 1329, 1327, 6875, 10476, 160, 4695, 4696, 4694, 54539, 7416, 7417, 7419, 27089, 513, 9167, 518, 516, 515, 514, 9377, 440567, 292, 522, 54205, 7052, 5431, 5433, 56901, 5432, 10126, 1351, 5331, 148327, 6390, 6391, 7019, 1349, 1347, 1345, 6647, 1340, 509, 581, 836, 10105, 7381, 548644, 1337, 7388, 7386, 7384, 4709, 4707, 47…	1836	151	4044	1.48786	1.35746e-05	2.71493e-06	6.22277e-05
GOTERM_CC_FAT	GO:0005739~mitochondrion	639	15.0318	5.3648e-08	23659, 2002, 51373, 158, 1312, 10899, 374291, 55379, 118980, 2950, 94097, 740, 2011, 10714, 157378, 204, 1329, 63933, 1327, 63931, 207, 8725, 1716, 23788, 23787, 211, 119559, 78988, 823, 215, 55210, 57226, 219, 6890, 51499, 8038, 27089, 10730, 513, 1841, 22921, 622, 6472, 8443, 518, 516, 515, 411, 514, 401505, 328, 5245, 10884, 7317, 94081, 10743, 522, 521, 129607, 523, 51287, 617, 55486, 55139, …	3699	1272	8545	1.16049	7.06519e-05	2.52337e-06	8.77348e-05
GOTERM_BP_FAT	GO:0051236~establishment of RNA localization	98	2.30534	6.05046e-08	55746, 23511, 8570, 2332, 23279, 10204, 79902, 51634, 4927, 80145, 143244, 84248, 51637, 10921, 87178, 220988, 1977, 11097, 6396, 3921, 10657, 9793, 29894, 23225, 53981, 55795, 55916, 4686, 9818, 100101267, 4116, 79228, 7979, 57122, 8683, 23165, 7307, 7884, 11338, 7175, 9688, 1984, 4600, 5976, 29074, 3181, 10762, 65109, 55706, 23636, 65083, 9804, 79023, 7514, 9984, 26993, 26019, 55110, 57510, 810…	3840	153	9145	1.52541	0.000611152	6.947e-06	0.000123667
[truncated: 1,695 more rows]

## Sheet: S3.Wh-Normal
Supplementary Table S3.1: Correlation pairs in Wh-Normal
Note: The extra columns in the mRNA-mRNA pair section indicate whether the mRNA pair can be attributed to each respective factor.
Positive Correlations
mRNA-mRNA pairs											isomiR-mRNA pairs			tRNA fragment-mRNA pairs
mRNA_1	mRNA_2	PPI	Pathway	CellCompartment	DNA_motif	TF	Immune_Cell	isomiR	tRF		isomiR	mRNA		tRNA_fragment	mRNA
[truncated: 10,003 more rows]

## Sheet: S3.Wh-TNBC
Supplementary Table S3.2: Correlation pairs in Wh-TNBC
[truncated: 10,007 more rows]

## Sheet: S3.B.Aa-TNBC
Supplementary Table S3.3: Correlation pairs in B/Aa-TNBC
[truncated: 10,007 more rows]

[truncated: 4 more sheets: S4, S5, S6, S7]
